# Supplementary material for: Particulate matter resuspension from simulated urban green floors using a wind tunnel-mounted closed chamber
Source: PeerJ. 2023 Feb 8;11:e14674. doi: 10.7717/peerj.14674 (PMC9921991; doi:10.7717/peerj.14674)
Supplement: Supplemental Information 1 [file peerj-11-14674-s001.xlsx]

## Sheet: sand Blank
ug/m^3	4ms	1/8
PM	10	2.5	1	10	2.5	1	10	2.5	1	10	2.5	1		Total	PM10	1106
	0	0	0	0	0	0	0	0	0	0	0	0		4.2	5.2	3.5	35.9
	0	0	0	0	0	0	0	0	0	0	0	0
	0	0	0	0	0	0	0	0	0	0	0	0		12.2	7.9077
	0	0	0	0	0	0	0	0	0	0	0	0
	0	0	0	0	0	0	0	0	0	0	0	0
	0	0	0	0	0	0	0	0	0	0	0	0
	0	0	0	0	0	0	0	0	0	0	0	0
	0	0	0	0.1	0.1	0.1	0	0	0	0	0	0
	0	0	0	0	0	0	0	0	0	0	0	0
	0	0	0	0	0	0	0	0	0	0	0	0
	0	0	0	0	0	0	0	0	0	0	0	0
	0	0	0	0	0	0	0	0	0	0.1	0.1	0.1
	0	0	0	0	0	0	0	0	0	0	0	0
	0	0	0	0	0	0	0	0	0	0	0	0
	0	0	0	0.1	0.1	0.1	0	0	0	0	0	0
	0	0	0	0	0	0	0	0	0	0	0	0
	0	0	0	0	0	0	0	0	0	0	0	0
	0	0	0	0.1	0.1	0.1	0	0	0	0	0	0
	0	0	0	0	0	0	0	0	0	0	0	0
	0	0	0	0	0	0	0	0	0	0	0	0
	0	0	0	0	0	0	0	0	0	0	0	0
	0	0	0	0	0	0	0	0	0	0	0	0
	0	0	0	0	0	0	0	0	0	0	0	0
	0	0	0	0	0	0	0	0	0	0	0	0
	0	0	0	0	0	0	0	0	0	0	0	0
	0	0	0	0	0	0	0	0	0	0	0	0
	0	0	0	0.1	0.1	0.1	0	0	0	0	0	0
	0	0	0	0	0	0	0	0	0	0	0	0
	0	0	0	0	0	0	0	0	0	0	0	0
	0	0	0	0	0	0	0	0	0	0	0	0
	0	0	0	0	0	0	0	0	0	0	0	0
	0	0	0	0	0	0	0	0	0	0	0	0
	0	0	0	0	0	0	0	0	0	0	0	0
	0	0	0	0	0	0	0	0	0	0	0	0
	0	0	0	0	0	0	0	0	0	0	0	0
	0	0	0	0	0	0	0	0	0	0	0	0
	0	0	0	0	0	0	0	0	0	0	0	0
	0	0	0	0	0	0	0	0	0	0	0	0
	0	0	0	0	0	0	0	0	0	0	0	0
	0	0	0	0	0	0	0	0	0	0	0	0
	0	0	0	0	0	0	0	0	0	0	0	0
	0	0	0	0	0	0	0	0	0	0	0	0
	0	0	0	0	0	0	0	0	0	0	0	0
	0	0	0	0	0	0	0	0	0	0	0	0
	0	0	0	0	0	0	0	0	0	0	0	0
	0	0	0	0	0	0	0	0	0	0	0	0
	0	0	0	0	0	0	0	0	0	0	0	0
	0	0	0	0	0	0	0	0	0	0	0	0
	0	0	0	0	0	0	0	0	0	0	0	0
	0	0	0	0	0	0	0	0	0	0	0	0
	0	0	0	0	0	0	0	0	0	0	0	0
	0	0	0	0	0	0	0	0	0	0	0	0
	0	0	0	0	0	0	0	0	0	0	0	0
	0	0	0	0	0	0	0	0	0	0	0	0
	0	0	0	0	0	0	0	0	0	0	0	0
	0.1	0.1	0	0	0	0	0	0	0	0	0	0
	0	0	0	0	0	0	0	0	0	0	0	0
	0	0	0	0	0	0	0	0	0	0	0	0
	0	0	0	0	0	0	0	0	0	0	0	0
	0	0	0	0.1	0.1	0.1	0	0	0	0	0	0
	0	0	0	0	0	0	0	0	0	0	0	0
	0	0	0	0	0	0	0.1	0.1	0.1	0	0	0
	0	0	0	0	0	0	0	0	0	0	0	0
	0	0	0	0	0	0	0	0	0	0	0	0
	0	0	0	0	0	0	0	0	0	0	0	0
	0	0	0	0	0	0	0	0	0	0	0	0
	0	0	0	0	0	0	0	0	0	0	0	0
	0	0	0	0	0	0	0	0	0	0	0	0
	0	0	0	0	0	0	0	0	0	0	0	0
	0	0	0	0.1	0.1	0.1	0	0	0	0	0	0
	0	0	0	0	0	0	0	0	0	0	0	0
	0	0	0	0	0	0	0	0	0	0	0	0
	0	0	0	0	0	0	0	0	0	0	0	0
	0	0	0	0.1	0.1	0.1	0	0	0	0	0	0
	0	0	0	0	0	0	0	0	0	0	0	0
	0	0	0	0	0	0	0	0	0	0	0	0
	0	0	0	0	0	0	0	0	0	0	0	0
	0	0	0	0	0	0	0	0	0	0	0	0
	0	0	0	0	0	0	0	0	0	0	0	0
	0	0	0	0	0	0	0	0	0	0	0	0
	0	0	0	0	0	0	0	0	0	0	0	0
	0	0	0	0	0	0	0	0	0	0	0	0
	0	0	0	0	0	0	0	0	0	0	0	0
	0	0	0	0	0	0	0	0	0	0	0	0
	0	0	0	0	0	0	0.1	0.1	0.1	0	0	0
	0	0	0	0	0	0	0	0	0	0	0	0
	0	0	0	0	0	0	0	0	0	0	0	0
	0	0	0	0	0	0	0	0	0	0	0	0
	0	0	0	0	0	0	0	0	0	0	0	0
	0	0	0	0	0	0	0	0	0	0	0	0
	0	0	0	0	0	0	0	0	0	0	0	0
	0.1	0.1	0	0	0	0	0	0	0	0	0	0
	0	0	0	0	0	0	0	0	0	0	0	0
	0	0	0	0	0	0	0	0	0	0	0	0
	0	0	0	0	0	0	0	0	0	0	0	0
	0	0	0	0	0	0	0	0	0	0	0	0
	0	0	0	0	0	0	0	0	0	0	0	0
	0	0	0	0	0	0	0	0	0	0	0	0
	0	0	0	0	0	0	0	0	0	0	0	0
	0	0	0	0	0	0	0	0	0	0	0	0
	0	0	0	0	0	0	0.1	0.1	0.1	0	0	0
	0	0	0	0	0	0	0	0	0	0	0	0
	0	0	0	0	0	0	0	0	0	0	0	0
	0	0	0	0	0	0	0	0	0	0	0	0
	0	0	0	0	0	0	0.1	0.1	0.1	0	0	0
	0	0	0	0	0	0	0	0	0	0	0	0
	0	0	0	0	0	0	0	0	0	0	0	0
	0	0	0	0	0	0	0	0	0	0	0	0
	0	0	0	0	0	0	0	0	0	0	0	0
	0	0	0	0.7	0.5	0	0	0	0	0	0	0
	0	0	0	0	0	0	0.1	0.1	0.1	0	0	0
	0	0	0	0	0	0	0	0	0	0	0	0
	0	0	0	0	0	0	0	0	0	0	0	0
	0	0	0	0	0	0	0	0	0	0	0	0
	0	0	0	0	0	0	0	0	0	0	0	0
	0	0	0	0	0	0	0	0	0	0	0	0
	0	0	0	0	0	0	0	0	0	0	0	0
	0	0	0	0.1	0.1	0.1	0	0	0	0	0	0
	0	0	0	0	0	0	0	0	0	0	0	0
	0	0	0	0	0	0	0	0	0	0	0	0
	0	0	0	0	0	0	0	0	0	0	0	0
	0	0	0	0	0	0	0	0	0	0	0	0
	0	0	0	0	0	0	0	0	0	0	0	0
	0	0	0	0	0	0	0.2	0.2	0.1	0	0	0
	0	0	0	0	0	0	0	0	0	0	0	0
	0	0	0	0	0	0	0	0	0	0	0	0
	0	0	0	0	0	0	0	0	0	0	0	0
	0	0	0	0	0	0	0	0	0	0	0	0
	0	0	0	0.1	0.1	0.1	0	0	0	0	0	0
	0	0	0	0	0	0	1	0.6	0.1	0	0	0
	0	0	0	0	0	0	0	0	0	0	0	0
	0	0	0	0	0	0	0	0	0	0	0	0
	0	0	0	0	0	0	0	0	0	0	0	0
	0	0	0	0	0	0	0	0	0	0	0	0
	0	0	0	0	0	0	0	0	0	0	0	0
	0	0	0	0	0	0	0	0	0	0	0	0
	0	0	0	0	0	0	0	0	0	0	0	0
	0	0	0	0	0	0	0	0	0	0	0	0
	0	0	0	0	0	0	0	0	0	0	0	0
	0	0	0	0	0	0	0	0	0	0	0	0
	0	0	0	0	0	0	0	0	0	0	0	0
	0	0	0	0	0	0	0	0	0	0	0	0
	0	0	0	0	0	0	0	0	0	0	0	0
	0	0	0	0	0	0	0	0	0	0	0	0
	0	0	0	0	0	0	0	0	0	0	0	0
	0	0	0	0	0	0	0	0	0	0	0	0
	0	0	0	0	0	0	0	0	0	0	0	0
	0	0	0	0	0	0	0	0	0	0	0	0
	0	0	0	0	0	0	0.1	0.1	0.1	0	0	0
	0	0	0	0	0	0	0	0	0	0	0	0
	0	0	0	0	0	0	0	0	0	0	0	0
	0	0	0	0	0	0	0	0	0	0	0	0
	0	0	0	0	0	0	0	0	0	0	0	0
	0	0	0	0	0	0	0	0	0	0	0	0
	0	0	0	0	0	0	0	0	0	0	0	0
	0	0	0	0	0	0	0	0	0	0	0	0
	0	0	0	0	0	0	0	0	0	0	0	0
	0	0	0	0	0	0	0	0	0	0	0	0
	0	0	0	0	0	0	0	0	0	0	0	0
	0	0	0	0	0	0	0	0	0	0	0	0
	0	0	0	0	0	0	0.1	0.1	0.1	0	0	0
	0	0	0	0	0	0	0	0	0	0	0	0
	0	0	0	0	0	0	0	0	0	0	0	0
	0	0	0	0	0	0	0	0	0	0	0	0
	0	0	0	0	0	0	0	0	0	0	0	0
	0	0	0	0	0	0	0	0	0	0	0	0
	0	0	0	0	0	0	0	0	0	0	0	0
	0	0	0	0	0	0	0	0	0	0.1	0.1	0.1
	0	0	0	0	0	0	0.1	0.1	0.1	0	0	0
	0	0	0	0	0	0	0	0	0	0	0	0
	0	0	0	0	0	0	0	0	0	0	0	0
	0	0	0	0	0	0	0	0	0	0	0	0
	0	0	0	0	0	0	0	0	0	0	0	0
	0	0	0	0	0	0	0.1	0.1	0.1	0	0	0
	0	0	0	0.1	0.1	0.1	0	0	0	0	0	0
	0	0	0	0	0	0	0	0	0	0	0	0
	0	0	0	0	0	0	0	0	0	0	0	0
	0	0	0	0	0	0	0	0	0	0	0	0
	0	0	0	0	0	0	0	0	0	0	0	0
	0	0	0	0	0	0	0	0	0	0	0	0
	0	0	0	0	0	0	0	0	0	0	0	0
	0	0	0	0	0	0	0	0	0	0	0	0
	0	0	0	0	0	0	0	0	0	0	0	0
	0	0	0	0	0	0	0	0	0	0	0	0
	0	0	0	0	0	0	0	0	0	0	0	0
	0	0	0	0	0	0	0	0	0	0	0	0
	0	0	0	0	0	0	0.1	0.1	0.1	0	0	0
	0	0	0	0	0	0	0	0	0	0	0	0
	0	0	0	0	0	0	0	0	0	0	0	0
	0	0	0	0	0	0	0	0	0	0	0	0
	0	0	0	0	0	0	0	0	0	0	0	0
	0	0	0	0	0	0	0	0	0	0	0	0
	0	0	0	0	0	0	0	0	0	0	0	0
	0	0	0	0	0	0	0	0	0	0	0	0
	0	0	0	0	0	0	0	0	0	0	0	0
	0	0	0	0	0	0	0	0	0	0	0	0
	0	0	0	0	0	0	0	0	0	0	0	0
	0	0	0	0	0	0	0.1	0.1	0.1	0	0	0
	0	0	0	0	0	0	0	0	0	0.1	0.1	0.1
	0	0	0	0	0	0	0	0	0	0	0	0
	0	0	0	0	0	0	0	0	0	0	0	0
	0	0	0	0	0	0	0	0	0	0	0	0
	0	0	0	0	0	0	0	0	0	0	0	0
	0	0	0	0.1	0.1	0.1	0	0	0	0	0	0
	0	0	0	0.1	0.1	0.1	0	0	0	0	0	0
	0	0	0	0	0	0	0	0	0	0	0	0
	0	0	0	0	0	0	0	0	0	0	0	0
	0	0	0	0	0	0	0	0	0	0	0	0
	0	0	0	0	0	0	0	0	0	0	0	0
	0	0	0	0	0	0	0	0	0	0	0	0
	0	0	0	0	0	0	0	0	0	0	0	0
	0	0	0	0	0	0	0	0	0	0	0	0
	0	0	0	0	0	0	0	0	0	0	0	0
	0	0	0	0	0	0	0	0	0	0	0	0
	0	0	0	0	0	0	0.1	0.1	0.1	0	0	0
	0	0	0	0	0	0	0	0	0	0	0	0
	0	0	0	0	0	0	0	0	0	0	0	0
	0	0	0	0	0	0	0	0	0	0	0	0
	0	0	0	0	0	0	0	0	0	0	0	0
	0	0	0	0	0	0	0	0	0	0	0	0
	0	0	0	0	0	0	0	0	0	0	0	0
	0	0	0	0	0	0	0	0	0	0	0	0
	0	0	0	0	0	0	0.1	0.1	0.1	0	0	0
	0	0	0	0	0	0	0	0	0	0	0	0
	0.1	0.1	0.1	0.1	0.1	0.1	0.1	0.1	0	0.1	0.1	0.1
	0	0	0	0	0	0	0	0	0	0	0	0
	0	0	0	0	0	0	0	0	0	0	0	0
	0	0	0	0	0	0	0	0	0	0.1	0.1	0.1
	0	0	0	0.1	0.1	0.1	0	0	0	0	0	0
	0	0	0	0	0	0	0	0	0	0	0	0
	0	0	0	0	0	0	0	0	0	0.1	0.1	0.1
	0	0	0	0	0	0	0	0	0	0	0	0
	0	0	0	0.1	0.1	0.1	0	0	0	0	0	0
	0	0	0	0	0	0	0	0	0	0	0	0
	0	0	0	0	0	0	0	0	0	0.1	0.1	0.1
	0	0	0	0	0	0	0	0	0	0	0	0
	0	0	0	0	0	0	0	0	0	0	0	0
	0	0	0	0.1	0.1	0.1	0	0	0	0	0	0
	0	0	0	0	0	0	0	0	0	0	0	0
	0	0	0	0	0	0	0	0	0	0	0	0
	0	0	0	0	0	0	0.2	0.2	0.1	0	0	0
	0	0	0	0	0	0	0	0	0	0	0	0
	0	0	0	0	0	0	0	0	0	0	0	0
	0	0	0	0	0	0	0	0	0	0	0	0
	0	0	0	0	0	0	0	0	0	0	0	0
	0	0	0	0	0	0	0	0	0	0	0	0
	0	0	0	0	0	0	0	0	0	0	0	0
	0	0	0	0	0	0	0	0	0	0	0	0
	0	0	0	0	0	0	0	0	0	0	0	0
	0	0	0	0	0	0	0	0	0	0	0	0
	0	0	0	0	0	0	0	0	0	0	0	0
	0	0	0	0	0	0	0	0	0	0.1	0.1	0.1
	0	0	0	0	0	0	0	0	0	0	0	0
	0	0	0	0	0	0	0	0	0	0	0	0
	0	0	0	0	0	0	0	0	0	0	0	0
	0	0	0	0	0	0	0	0	0	0.1	0.1	0.1
	0	0	0	0	0	0	0	0	0	0	0	0
	0	0	0	0	0	0	0	0	0	0	0	0
	0	0	0	0	0	0	0	0	0	0	0	0
	0	0	0	0	0	0	0.1	0.1	0.1	0.1	0.1	0.1
	0	0	0	0	0	0	0	0	0	0.1	0.1	0.1
	0	0	0	0.1	0.1	0.1	0	0	0	0	0	0
	0	0	0	0	0	0	0	0	0	0	0	0
	0	0	0	0	0	0	0	0	0	0	0	0
	0	0	0	0	0	0	0	0	0	0	0	0
	0	0	0	0	0	0	0	0	0	0	0	0
	0	0	0	0	0	0	0	0	0	0.1	0.1	0.1
	0	0	0	0	0	0	0	0	0	0	0	0
	0	0	0	0	0	0	0	0	0	0.1	0.1	0.1
	0	0	0	0	0	0	0	0	0	0	0	0
	0	0	0	0	0	0	0	0	0	0	0	0
	0	0	0	0	0	0	0	0	0	0	0	0
	0	0	0	0	0	0	0	0	0	0	0	0
	0	0	0	0	0	0	0	0	0	0	0	0
	0	0	0	0	0	0	0	0	0	0	0	0
	0	0	0	0	0	0	0	0	0	0	0	0
	0	0	0	0	0	0	0	0	0	0	0	0
	0	0	0	0	0	0	0	0	0	0.1	0.1	0.1
	0	0	0	0	0	0	0	0	0	0	0	0
	0	0	0	0	0	0	0	0	0	0	0	0
	0	0	0	0	0	0	0.1	0.1	0	0.1	0.1	0.1
	0	0	0	0	0	0	0	0	0	0.1	0.1	0.1
	0	0	0	0	0	0	0	0	0	0	0	0
	0	0	0	0	0	0	0	0	0	0	0	0
	0	0	0	0	0	0	0	0	0	0	0	0
	0	0	0	0.1	0.1	0.1	0	0	0	0	0	0
	0	0	0	0	0	0	0	0	0	0	0	0
	0	0	0	0	0	0	0	0	0	0	0	0
	0	0	0	0	0	0	0.1	0.1	0.1	0	0	0
	0	0	0	0	0	0	0	0	0	0	0	0
	0	0	0	0	0	0	0	0	0	0	0	0
	0	0	0	0	0	0	0	0	0	0.1	0.1	0.1
	0	0	0	0	0	0	0	0	0	0	0	0
	0	0	0	0	0	0	0	0	0	0	0	0
	0	0	0	0	0	0	0	0	0	0	0	0
	0	0	0	0	0	0	0	0	0	0.1	0.1	0.1
	0	0	0	0	0	0	0	0	0	0	0	0
	0	0	0	0	0	0	0	0	0	0	0	0
	0	0	0	0	0	0	0	0	0	0	0	0
	0	0	0	0	0	0	0	0	0	0	0	0
	0	0	0	0	0	0	0	0	0	0	0	0
	0	0	0	0	0	0	0	0	0	0	0	0
	0	0	0	0.1	0.1	0.1	0	0	0	0	0	0
	0	0	0	0	0	0	0	0	0	0	0	0
	0	0	0	0	0	0	0	0	0	0	0	0
	0	0	0	0	0	0	0.1	0.1	0.1	0	0	0
	0	0	0	0	0	0	0	0	0	0	0	0
	0	0	0	0	0	0	0	0	0	0	0	0
	0	0	0	0	0	0	0	0	0	0	0	0
	0	0	0	0	0	0	0	0	0	0	0	0
	0	0	0	0	0	0	0	0	0	0.1	0.1	0.1
	0	0	0	0	0	0	0	0	0	0	0	0
	0	0	0	0	0	0	0	0	0	0	0	0
	0	0	0	0	0	0	0	0	0	0	0	0
	0	0	0	0	0	0	0	0	0	0	0	0
	0	0	0	0	0	0	0	0	0	0	0	0
	0	0	0	0	0	0	0	0	0	0	0	0
	0	0	0	0	0	0	0	0	0	0.1	0.1	0.1
	0	0	0	0	0	0	0	0	0	0	0	0
	0	0	0	0	0	0	0	0	0	0	0	0
	0	0	0	0	0	0	0	0	0	0	0	0
	0	0	0	0	0	0	0	0	0	0	0	0
	0	0	0	0	0	0	0	0	0	0	0	0
	0	0	0	0	0	0	0	0	0	0.1	0.1	0.1
	0	0	0	0	0	0	0	0	0	0	0	0
	0	0	0	0	0	0	0	0	0	0	0	0
	0	0	0	0	0	0	0	0	0	0	0	0
	0	0	0	0	0	0	0	0	0	0	0	0
	0.1	0.1	0	0	0	0	0	0	0	0	0	0
	0	0	0	0	0	0	0	0	0	0	0	0
	0	0	0	0	0	0	0	0	0	0	0	0
	0	0	0	0	0	0	0	0	0	0.1	0.1	0.1
	0	0	0	0	0	0	0	0	0	0	0	0
	0	0	0	0	0	0	0	0	0	0	0	0
	0	0	0	0	0	0	0	0	0	0	0	0
	0	0	0	0	0	0	0	0	0	0.1	0.1	0.1
	0	0	0	0	0	0	0	0	0	0	0	0
	0	0	0	0	0	0	0	0	0	0	0	0
	0	0	0	0	0	0	0	0	0	0	0	0
	0	0	0	0.1	0.1	0.1	0	0	0	0	0	0
	0	0	0	0	0	0	0	0	0	0	0	0
	0	0	0	0	0	0	0	0	0	0.1	0.1	0
	0	0	0	0.1	0.1	0.1	0	0	0	0	0	0
	0	0	0	0	0	0	0	0	0	0	0	0
	0	0	0	0	0	0	0	0	0	0	0	0
	0	0	0	0	0	0	0	0	0	0	0	0
	0	0	0	0	0	0	0	0	0	0	0	0
	0	0	0	0	0	0	0	0	0	0	0	0
	0	0	0	0	0	0	0	0	0	0	0	0
	0	0	0	0	0	0	0	0	0	0	0	0
	0	0	0	0	0	0	0	0	0	0.1	0.1	0.1
	0.1	0.1	0	0	0	0	0	0	0	0.1	0.1	0.1
	0	0	0	0	0	0	0	0	0	0	0	0
	0	0	0	0	0	0	0	0	0	0	0	0
	0	0	0	0	0	0	0	0	0	0	0	0
	0	0	0	0	0	0	0	0	0	0	0	0
	0	0	0	0	0	0	0	0	0	0	0	0
	0	0	0	0	0	0	0	0	0	0	0	0
	0	0	0	0	0	0	0	0	0	0.1	0.1	0.1
	0	0	0	0	0	0	0.1	0.1	0.1	0	0	0
	0	0	0	0	0	0	0	0	0	0	0	0
	0	0	0	0	0	0	0	0	0	0	0	0
	0	0	0	0	0	0	0	0	0	0	0	0
	0	0	0	0	0	0	0	0	0	0	0	0
	0	0	0	0	0	0	0	0	0	0	0	0
	0	0	0	0	0	0	0	0	0	0	0	0
	0	0	0	0	0	0	0	0	0	0.1	0.1	0.1
	0	0	0	0	0	0	0	0	0	0.1	0.1	0.1
	0	0	0	0	0	0	0	0	0	0.1	0.1	0.1
	0	0	0	0	0	0	0	0	0	0	0	0
	0	0	0	0	0	0	0	0	0	0	0	0
	0	0	0	0	0	0	0	0	0	0	0	0
	0	0	0	0	0	0	0	0	0	0	0	0
	0	0	0	0	0	0	0	0	0	0	0	0
	0	0	0	0	0	0	0	0	0	0	0	0
	0	0	0	0	0	0	0	0	0	0	0	0
	0	0	0	0	0	0	0	0	0	0	0	0
	0	0	0	0	0	0	0	0	0	0	0	0
	0	0	0	0	0	0	0	0	0	0	0	0
	0	0	0	0	0	0	0	0	0	0	0	0
	0	0	0	0	0	0	0	0	0	0	0	0
	0	0	0	0	0	0	0	0	0	0	0	0
	0	0	0	0	0	0	0	0	0	0	0	0
	0	0	0	0	0	0	0	0	0	0	0	0
	0.1	0.1	0	0	0	0	0	0	0	0	0	0
	0.1	0.1	0.1	0	0	0	0	0	0	0	0	0
	0	0	0	0	0	0	0	0	0	0	0	0
	0	0	0	0	0	0	0	0	0	0.1	0.1	0.1
	0	0	0	0	0	0	0	0	0	0	0	0
	0	0	0	0	0	0	0	0	0	0	0	0
	0	0	0	0	0	0	0	0	0	0	0	0
	0	0	0	0	0	0	0	0	0	0	0	0
	0	0	0	0	0	0	0	0	0	0	0	0
	0	0	0	0	0	0	0	0	0	0.1	0.1	0.1
	0	0	0	0	0	0	0	0	0	0	0	0
	0	0	0	0	0	0	0	0	0	0	0	0
	0	0	0	0	0	0	0	0	0	0	0	0
	0	0	0	0	0	0	0	0	0	0	0	0
	0	0	0	0	0	0	0	0	0	0	0	0
	0	0	0	0	0	0	0	0	0	0	0	0
	0	0	0	0	0	0	0	0	0	0	0	0
	0	0	0	0	0	0	0	0	0	0	0	0
	0	0	0	0	0	0	0	0	0	0	0	0
	0	0	0	0	0	0	0	0	0	0.1	0.1	0.1
	0	0	0	0	0	0	0	0	0	0	0	0
	0	0	0	0	0	0	0	0	0	0	0	0
	0	0	0	0	0	0	0	0	0	0	0	0
	0	0	0	0	0	0	0	0	0	0	0	0
	0	0	0	0	0	0	0	0	0	0	0	0
	0	0	0	0	0	0	0	0	0	0.1	0.1	0.1
	0	0	0	0	0	0	0	0	0	0.1	0.1	0.1
	0	0	0	0	0	0	0	0	0	0	0	0
	0	0	0	0	0	0	0	0	0	0	0	0
	0	0	0	0	0	0	0.1	0.1	0.1	0	0	0
	0	0	0	0	0	0	0.1	0.1	0.1	0	0	0
	0	0	0	0	0	0	0	0	0	0	0	0
	0	0	0	0	0	0	0	0	0	0	0	0
	0	0	0	0	0	0	0	0	0	0	0	0
	0	0	0	0.1	0.1	0.1	0	0	0	0	0	0
	0	0	0	0	0	0	0	0	0	0.1	0.1	0.1
	0	0	0	0	0	0	0	0	0	0.1	0.1	0.1
	0	0	0	0	0	0	0	0	0	0	0	0
	0	0	0	0	0	0	0	0	0	0	0	0
	0	0	0	0	0	0	0	0	0	0	0	0
	0	0	0	0	0	0	0	0	0	0	0	0
	0	0	0	0	0	0	0	0	0	0	0	0
	0	0	0	0	0	0	0	0	0	0	0	0
	0.1	0.1	0.1	0	0	0	0	0	0	0	0	0
	0	0	0	0	0	0				0	0	0
	0	0	0	0	0	0				0	0	0
	0	0	0	0	0	0				0	0	0
	0	0	0	0	0	0				0	0	0
	0	0	0	0	0	0				0	0	0
	0	0	0	0	0	0				0.1	0.1	0.1
	0	0	0	0	0	0				0	0	0
	0	0	0	0	0	0				0	0	0
	0	0	0	0.1	0.1	0.1				0.1	0.1	0.1
	0	0	0	0	0	0				0.1	0.1	0.1
	0	0	0	0	0	0				0	0	0
	0	0	0	0	0	0				0	0	0
	0	0	0	0	0	0				0	0	0
	0	0	0	0.1	0.1	0.1				0	0	0
	0	0	0	0	0	0				0	0	0
	0	0	0	0	0	0				0.1	0.1	0.1
	0	0	0	0	0	0				0	0	0
	0	0	0	0	0	0				0	0	0
	0	0	0	0	0	0				0	0	0
	0	0	0	0	0	0				0	0	0
	0	0	0	0	0	0				0	0	0
	0	0	0	0	0	0				0.1	0.1	0.1
	0	0	0	0	0	0				0	0	0
	0	0	0	0	0	0				0	0	0
	0	0	0	0	0	0				0	0	0
	0.1	0.1	0.1	0	0	0				0	0	0
	0	0	0	0	0	0				0.1	0.1	0.1
	0	0	0	0	0	0				0	0	0
	0	0	0	0	0	0				0.1	0.1	0.1
	0	0	0	0	0	0				0	0	0
	0	0	0	0	0	0				0	0	0
	0.1	0.1	0.1	0	0	0				0	0	0
	0	0	0	0	0	0				0	0	0
	0	0	0	0.1	0.1	0.1				0	0	0
	0	0	0	0	0	0				0	0	0
	0	0	0	0	0	0				0.1	0.1	0.1
	0	0	0	0	0	0				0	0	0
	0	0	0	0	0	0				0	0	0
	0	0	0	0	0	0				0	0	0
	0	0	0	0	0	0				0	0	0
	0	0	0	0	0	0				0	0	0
	0	0	0	0	0	0				0	0	0
	0	0	0	0	0	0				0	0	0
	0	0	0	0	0	0				0	0	0
	0	0	0	0	0	0				0	0	0
	0	0	0	0	0	0				0.1	0.1	0.1
	0	0	0	0	0	0				0	0	0
	0	0	0	0	0	0				0	0	0
	0	0	0	0	0	0				0	0	0
	0.1	0.1	0.1	0	0	0				0	0	0
	0	0	0	0	0	0				0.1	0.1	0.1
	0	0	0	0	0	0				0.1	0.1	0.1
	0	0	0	0	0	0				0	0	0
	0	0	0	0	0	0				0.1	0.1	0.1
	0	0	0	0	0	0				0	0	0
	0	0	0	0	0	0				0	0	0
	0	0	0	0	0	0				0	0	0
	0	0	0	0	0	0				0	0	0
	0	0	0	0	0	0				0	0	0
	0	0	0	0	0	0				0	0	0
	0	0	0	0	0	0				0.1	0.1	0.1
	0	0	0	0	0	0				0.1	0.1	0.1
	0	0	0	0	0	0				0.1	0.1	0.1
	0	0	0	0	0	0				0	0	0
	0	0	0	0.1	0.1	0.1				0	0	0
	0	0	0	0	0	0				0	0	0
	0	0	0	0	0	0				0	0	0
	0	0	0	0	0	0				0	0	0
	0	0	0	0	0	0				0	0	0
	0	0	0	0	0	0				0	0	0
	0	0	0	0	0	0				0.1	0.1	0.1
	0	0	0	0	0	0				0	0	0
	0	0	0	0.1	0.1	0				0.1	0.1	0.1
	0	0	0	0	0	0				0	0	0
	0	0	0	0	0	0				0	0	0
	0	0	0	0	0	0				0	0	0
	0	0	0	0	0	0				0	0	0
	0	0	0	0	0	0				0.1	0.1	0.1
	0	0	0	0	0	0				0	0	0
	0	0	0	0	0	0				0	0	0
	0	0	0	0.1	0.1	0.1				0	0	0
	0	0	0	0	0	0				0	0	0
	0	0	0	0	0	0				0.1	0.1	0.1
	0	0	0	0	0	0				0	0	0
	0	0	0	0	0	0				0.1	0.1	0.1
	0.1	0.1	0.1	0	0	0				0.1	0.1	0.1
	0	0	0	0	0	0				0.1	0.1	0.1
	0	0	0	0	0	0				0	0	0
	0	0	0	0.4	0.3	0				0	0	0
	0	0	0	0	0	0				0	0	0
	0	0	0	0	0	0				0	0	0
	0	0	0	0	0	0				0	0	0
	0	0	0	0	0	0				0	0	0
	0	0	0	0	0	0				0.1	0.1	0.1
	0	0	0	0	0	0				0	0	0
	0	0	0	0	0	0				0.1	0.1	0.1
	0	0	0	0	0	0				0	0	0
	0	0	0	0	0	0				0	0	0
	0	0	0	0	0	0				0.1	0.1	0.1
	0	0	0	0.2	0.2	0.1				0	0	0
	0.1	0.1	0.1	0	0	0				0	0	0
	0	0	0	0	0	0				0.1	0.1	0.1
	0	0	0	0	0	0				0	0	0
	0	0	0	0	0	0				0.1	0.1	0.1
	0	0	0	0	0	0				0	0	0
	0	0	0	0	0	0				0.1	0.1	0.1
	0	0	0	0.1	0.1	0.1				0	0	0
	0.1	0.1	0.1	0	0	0				0.1	0.1	0.1
	0	0	0	0	0	0				0	0	0
	0	0	0	0	0	0				0.1	0.1	0.1
	0	0	0	0	0	0				0	0	0
	0	0	0	0	0	0				0	0	0
	0	0	0	0	0	0				0	0	0
	0	0	0	0	0	0				0.1	0.1	0.1
	0	0	0	0	0	0				0	0	0
	0	0	0	0	0	0				0	0	0
	0	0	0	0	0	0				0	0	0
	0	0	0	0	0	0				0.1	0.1	0.1
	0	0	0	0	0	0				0	0	0
	0	0	0	0	0	0				0	0	0
	0	0	0	0	0	0				0	0	0
	0	0	0	0	0	0				0.1	0.1	0.1
	0	0	0	0	0	0				0	0	0
	0	0	0	0	0	0				0	0	0
	0	0	0	0	0	0				0	0	0
	0	0	0	0	0	0				0.1	0.1	0.1
	0	0	0	0.1	0.1	0.1				0	0	0
	0	0	0	0	0	0				0.1	0.1	0.1
	0	0	0	0	0	0				0.1	0.1	0.1
	0	0	0	0	0	0				0	0	0
	0	0	0	0	0	0				0.1	0.1	0.1
	0.1	0.1	0.1	0	0	0				0.1	0.1	0.1
	0	0	0	0	0	0				0.1	0.1	0.1
	0	0	0	0	0	0				0	0	0
	0	0	0	0	0	0				0.1	0.1	0.1
	0	0	0	0.1	0.1	0.1				0.1	0.1	0.1
	0	0	0	0	0	0				0.1	0.1	0.1
	0	0	0	0	0	0				0	0	0
	0	0	0	0	0	0				0	0	0
	0	0	0	0	0	0				0.1	0.1	0.1
	0	0	0	0	0	0				0	0	0
	0	0	0	0.1	0.1	0.1				0.1	0.1	0.1
	0	0	0	0	0	0				0	0	0
	0	0	0	0	0	0				0	0	0
	0	0	0	0	0	0				0.1	0.1	0.1
	0	0	0	0	0	0				0	0	0
	0	0	0	0	0	0				0	0	0
	0.1	0.1	0.1	0	0	0				0	0	0
	0	0	0	0	0	0				0	0	0
	0	0	0	0	0	0				0	0	0
	0	0	0	0	0	0				0	0	0
	0	0	0	0	0	0				0	0	0
	0	0	0	0	0	0				0.1	0.1	0.1
	0	0	0	0	0	0				0	0	0
	0	0	0	0.1	0.1	0.1				0	0	0
	0	0	0	0	0	0				0	0	0
	0.1	0.1	0	0	0	0				0	0	0
	0	0	0	0	0	0				0.1	0.1	0.1
	0	0	0	0	0	0				0	0	0
	0	0	0	0	0	0				0	0	0
	0	0	0	0	0	0				0	0	0
	0	0	0	0	0	0				0.1	0.1	0.1
	0	0	0	0	0	0				0	0	0
	0	0	0	0	0	0				0.1	0.1	0.1
	0	0	0	0	0	0				0.1	0.1	0.1
	0	0	0	0	0	0				0.1	0.1	0.1
	0	0	0	0	0	0				0	0	0
	0	0	0	0	0	0				0	0	0
	0	0	0	0.1	0.1	0.1				0.1	0.1	0.1
	0	0	0	0	0	0				0	0	0
	0	0	0	0	0	0				0.1	0.1	0.1
	0	0	0	0	0	0				0	0	0
	0	0	0	0	0	0				0	0	0
	0	0	0	0	0	0				0.1	0.1	0.1
	0	0	0	0	0	0				0.1	0.1	0.1
	0	0	0	0	0	0				0	0	0
	0	0	0	0	0	0				0.1	0.1	0.1
	0	0	0	0	0	0				0.1	0.1	0.1
	0	0	0	0.1	0.1	0.1				0.1	0.1	0.1
	0	0	0	0	0	0				0	0	0
	0	0	0	0	0	0				0	0	0
	0	0	0	0	0	0				0	0	0
	0	0	0	0	0	0				0	0	0
	0	0	0	0.1	0.1	0.1				0	0	0
	0	0	0	0	0	0				0.1	0.1	0.1
	0	0	0	0.1	0.1	0.1				0.1	0.1	0.1
	0	0	0	0	0	0				0	0	0
	0	0	0	0	0	0				0.1	0.1	0.1
	0	0	0	0	0	0				0	0	0
	0	0	0	0	0	0				0	0	0
	0	0	0	0	0	0				0.1	0.1	0.1
	0	0	0	0	0	0				0.1	0.1	0.1
	0	0	0	0	0	0				0	0	0
	0	0	0	0	0	0				0	0	0
	0	0	0	0	0	0				0	0	0
	0	0	0	0	0	0				0	0	0
	0	0	0	0.1	0.1	0.1				0.1	0.1	0.1
	0	0	0	0	0	0				0.1	0.1	0.1
	0	0	0	0.1	0.1	0.1				0.1	0.1	0.1
	0	0	0	0	0	0				0.1	0.1	0.1
	0	0	0	0	0	0				0.1	0.1	0.1
	0	0	0	0	0	0				0.1	0.1	0.1
	0	0	0	0	0	0				0	0	0
	0	0	0	0	0	0				0.1	0.1	0.1
	0	0	0							0	0	0
	0	0	0							0.1	0.1	0.1
	0	0	0							0.1	0.1	0.1
	0	0	0							0	0	0
	0	0	0							0	0	0
	0	0	0							0	0	0
	0	0	0							0	0	0
	0	0	0							0.1	0.1	0.1
	0	0	0							0	0	0
	0	0	0							0.1	0.1	0.1
	0	0	0							0	0	0
	0	0	0							0.1	0.1	0.1
	0	0	0							0	0	0
	0	0	0							0.1	0.1	0.1
	0	0	0							0	0	0
	0	0	0							0.1	0.1	0.1
	0	0	0							0	0	0
	0	0	0							0	0	0
	0	0	0							0.1	0.1	0.1
	0	0	0							0.1	0.1	0.1
	0	0	0							0	0	0
	0	0	0							0	0	0
	0	0	0							0.1	0.1	0.1
	0	0	0							0	0	0
	0	0	0							0	0	0
	0	0	0							0	0	0
	0	0	0							0	0	0
	0.1	0.1	0.1							0	0	0
	0	0	0							0.1	0.1	0.1
	0	0	0							0	0	0
	0	0	0							0	0	0
	0	0	0							0.1	0.1	0.1
	0	0	0							0.1	0.1	0.1
	0	0	0							0	0	0
	0	0	0							0.1	0.1	0.1
	0.1	0.1	0.1							0	0	0
	0	0	0							0.1	0.1	0.1
	0	0	0							0	0	0
	0	0	0							0.1	0.1	0.1
	0	0	0							0.1	0.1	0.1
	0	0	0							0.1	0.1	0.1
	0	0	0							0	0	0
	0	0	0							0	0	0
	0	0	0							0	0	0
	0	0	0							0.1	0.1	0.1
	0	0	0							0.1	0.1	0.1
	0	0	0							0.1	0.1	0.1
	0	0	0							0	0	0
	0	0	0							0	0	0
	0	0	0							0.1	0.1	0.1
	0	0	0							0	0	0
	0	0	0							0	0	0
	0	0	0							0.1	0.1	0.1
	0	0	0							0	0	0
	0	0	0							0.1	0.1	0.1
	0	0	0							0	0	0
	0	0	0							0	0	0
	0	0	0							0.1	0.1	0.1
	0	0	0							0.1	0.1	0.1
	0	0	0							0	0	0
	0	0	0							0.1	0.1	0.1
	0	0	0							0	0	0
	0	0	0							0	0	0
	0	0	0							0	0	0
	0	0	0							0	0	0
	0	0	0							0	0	0
	0	0	0							0	0	0
	0	0	0							0.1	0.1	0.1
	0	0	0							0	0	0
	0	0	0							0	0	0
	0	0	0							0.1	0.1	0.1
	0	0	0							0	0	0
	0	0	0							0	0	0
	0	0	0							0	0	0
	0.1	0.1	0							0.1	0.1	0.1
	0	0	0							0.1	0.1	0.1
	0	0	0							0	0	0
	0	0	0							0	0	0
	0	0	0							0	0	0
	0.1	0.1	0.1							0	0	0
	0	0	0							0	0	0
	0	0	0							0	0	0
	0	0	0							0	0	0
	0	0	0							0	0	0
	0	0	0							0	0	0
	0	0	0							0	0	0
	0	0	0							0.1	0.1	0.1
	0.1	0.1	0.1							0	0	0
	0	0	0							0	0	0
	0	0	0							0	0	0
	0	0	0							0	0	0
	0	0	0							0.1	0.1	0.1
	0	0	0							0.1	0.1	0.1
	0	0	0							0	0	0
	0	0	0							0.1	0.1	0.1
	0	0	0							0.1	0.1	0.1
	0	0	0							0.1	0.1	0.1
	0	0	0							0	0	0
	0	0	0							0.1	0.1	0.1
	0.1	0.1	0.1							0	0	0
	0	0	0							0	0	0
	0	0	0							0.1	0.1	0.1
	0	0	0							0	0	0
	0	0	0							0	0	0
	0	0	0							0	0	0
	0	0	0							0.1	0.1	0.1
	0	0	0							0	0	0
	0	0	0							0.1	0.1	0.1
	0	0	0							0.1	0.1	0.1
	0	0	0							0.1	0.1	0.1
	0	0	0							0	0	0
	0	0	0							0	0	0
	0	0	0							0	0	0
	0	0	0							0.1	0.1	0.1
	0	0	0							0.1	0.1	0.1
	0	0	0							0	0	0
	0	0	0							0	0	0
	0	0	0							0.1	0.1	0.1
	0	0	0							0.1	0.1	0.1
	0	0	0							0	0	0
	0	0	0							0	0	0
	0	0	0							0	0	0
	0	0	0							0	0	0
	0	0	0							0	0	0
	0	0	0							0	0	0
	0	0	0							0.1	0.1	0.1
	0	0	0							0.1	0.1	0.1
	0	0	0							0.1	0.1	0.1
	0.1	0.1	0.1							0.1	0.1	0.1
	0	0	0							0	0	0
	0	0	0							0.1	0.1	0.1
	0	0	0							0.1	0.1	0.1
	0	0	0							0	0	0
	0	0	0							0.1	0.1	0.1
	0	0	0							0	0	0
	0	0	0							0	0	0
	0	0	0							0	0	0
	0	0	0							0.1	0.1	0.1
	0.1	0.1	0.1							0	0	0
	0	0	0							0	0	0
	0	0	0							0	0	0
	0	0	0							0.1	0.1	0.1
	0	0	0							0.1	0.1	0.1
	0	0	0							0	0	0
	0	0	0							0	0	0
	0	0	0							0.1	0.1	0.1
	0	0	0							0.1	0.1	0.1
	0	0	0							0.1	0.1	0.1
	0	0	0							0	0	0
	0	0	0							0	0	0
	0	0	0							0	0	0
	0	0	0							0	0	0
	0	0	0							0	0	0
	0	0	0							0	0	0
	0	0	0							0.1	0.1	0.1
	0	0	0							0.1	0.1	0.1
	0	0	0							0	0	0
	0.1	0.1	0.1							0.1	0.1	0.1
	0	0	0							0	0	0
	0.1	0.1	0.1							0.1	0.1	0.1
	0	0	0							0.1	0.1	0.1
	0	0	0							0	0	0
	0.1	0.1	0.1							0.1	0.1	0.1
	0	0	0							0.1	0.1	0.1
	0	0	0							0.1	0.1	0.1
	0	0	0							0.1	0.1	0.1
	0	0	0							0.1	0.1	0.1
	0	0	0							0	0	0
	0	0	0							0.1	0.1	0.1
	0.1	0.1	0.1							0.1	0.1	0.1
	0	0	0							0	0	0
	0	0	0							0.1	0.1	0.1
	0	0	0							0	0	0
	0	0	0							0	0	0
	0	0	0							0	0	0
	0	0	0							0	0	0
	0.1	0.1	0.1							0.1	0.1	0.1
	0	0	0							0.1	0.1	0.1
	0	0	0							0.1	0.1	0.1
	0	0	0							0	0	0
	0	0	0							0.1	0.1	0.1
	0	0	0							0.1	0.1	0.1
	0	0	0							0.1	0.1	0.1
	0	0	0							0	0	0
	0	0	0							0.1	0.1	0.1
	0	0	0							0	0	0
	0	0	0							0.1	0.1	0.1
	0	0	0							0.1	0.1	0.1
	0	0	0							0	0	0
	0	0	0							0	0	0
	0	0	0							0.1	0.1	0.1
	0	0	0							0.1	0.1	0.1
	0	0	0							0.1	0.1	0.1
	0	0	0							0	0	0
	0	0	0							0	0	0
	0	0	0							0.1	0.1	0.1
	0	0	0							0	0	0
	0	0	0							0.1	0.1	0.1
	0	0	0							0	0	0
	0	0	0							0	0	0
	0	0	0							0	0	0
	0	0	0							0	0	0
	0	0	0							0.1	0.1	0.1
	0	0	0							0	0	0
	0	0	0							0.1	0.1	0.1
	0	0	0							0.1	0.1	0.1
	0	0	0							0.1	0.1	0.1
	0	0	0							0	0	0
	0	0	0							0	0	0
	0	0	0							0	0	0
	0.1	0.1	0.1							0.1	0.1	0.1
	0	0	0							0.1	0.1	0.1
	0	0	0							0.1	0.1	0.1
	0	0	0							0	0	0
	0	0	0							0.1	0.1	0.1
	0	0	0							0.1	0.1	0.1
	0	0	0							0.1	0.1	0.1
	0	0	0							0	0	0
	0	0	0							0	0	0
	0	0	0							0	0	0
	0	0	0							0.1	0.1	0.1
	0.1	0.1	0.1							0	0	0
	0	0	0							0.1	0.1	0.1
	0	0	0							0.1	0.1	0.1
	0.4	0.3	0							0	0	0
	0	0	0							0.1	0.1	0.1
	0	0	0							0.1	0.1	0.1
	0	0	0							0	0	0
	0	0	0							0.1	0.1	0.1
	0	0	0							0.1	0.1	0.1
	0	0	0							0	0	0
	0	0	0							0.1	0.1	0.1
	0	0	0							0	0	0
	0.1	0.1	0.1							0.1	0.1	0.1
	0	0	0							0.1	0.1	0.1
	0	0	0							0.1	0.1	0.1
	0	0	0							0	0	0
	0	0	0							0.1	0.1	0.1
	0	0	0							0	0	0
	0	0	0							0	0	0
	0	0	0							0	0	0
	0	0	0							0.1	0.1	0.1
	0	0	0							0.1	0.1	0.1
	0	0	0							0	0	0
	0	0	0							0	0	0
	0	0	0							0.1	0.1	0.1
	0	0	0							0.1	0.1	0.1
	0	0	0							0	0	0
	0.1	0.1	0.1							0	0	0
	0	0	0							0.1	0.1	0.1
	0	0	0							0	0	0
	0	0	0							0	0	0
	0	0	0							0.1	0.1	0.1
	0.1	0.1	0.1							0.1	0.1	0.1
	0	0	0							0.1	0.1	0.1
	0	0	0							0.1	0.1	0.1
	0	0	0							0	0	0
	0.1	0.1	0.1							0	0	0
	0	0	0							0.1	0.1	0.1
	0	0	0							0	0	0
	0	0	0							0	0	0
	0	0	0							0.1	0.1	0.1
	0	0	0							0	0	0
	0	0	0							0.1	0.1	0.1
	0	0	0							0.1	0.1	0.1
	0	0	0							0.1	0.1	0.1
	0	0	0							0.1	0.1	0.1
	0	0	0							0.1	0.1	0.1
	0	0	0							0.1	0.1	0.1
	0	0	0							0.1	0.1	0.1
	0	0	0							0	0	0
	0	0	0							0.1	0.1	0.1
	0	0	0							0.1	0.1	0.1
	0	0	0							0.1	0.1	0.1
	0	0	0							0.1	0.1	0.1
	0	0	0							0.1	0.1	0.1
	0	0	0							0.1	0.1	0.1
	0	0	0							0.1	0.1	0.1
	0	0	0							0	0	0
	0	0	0							0	0	0
	0	0	0							0	0	0
	0	0	0							0.1	0.1	0.1
	0	0	0							0.1	0.1	0.1
	0	0	0							0.1	0.1	0.1
	0	0	0							0.1	0.1	0.1
	0.1	0.1	0.1							0	0	0
	0	0	0							0	0	0
	0	0	0							0.1	0.1	0.1
	0	0	0							0.1	0.1	0.1
	0	0	0							0.1	0.1	0.1
	0	0	0							0	0	0
	0	0	0							0	0	0
	0	0	0							0	0	0
	0	0	0							0	0	0
	0	0	0							0.1	0.1	0.1
	0	0	0							0	0	0
	0	0	0							0.1	0.1	0.1
	0	0	0							0.1	0.1	0.1
	0	0	0							0	0	0
	0	0	0							0	0	0
	0	0	0							0	0	0
	0	0	0							0	0	0
	0	0	0							0	0	0
	0	0	0							0	0	0
	0	0	0							0.1	0.1	0.1
	0	0	0							0.1	0.1	0.1
	0	0	0							0	0	0
	0	0	0							0	0	0
	0	0	0							0.1	0.1	0.1
	0	0	0							0.1	0.1	0.1
	0	0	0							0	0	0
	0.1	0.1	0.1							0.1	0.1	0.1
	0	0	0							0.1	0.1	0.1
	0	0	0							0.1	0.1	0.1
	0	0	0							0	0	0
	0	0	0							0	0	0
	0	0	0							0.1	0.1	0.1
	0	0	0							0	0	0
	0	0	0							0.1	0.1	0.1
										0	0	0
										0	0	0
										0	0	0
										0	0	0
										0.1	0.1	0.1
										0	0	0
										0.1	0.1	0.1
										0	0	0
										0.1	0.1	0.1
										0.1	0.1	0.1
										0.1	0.1	0.1
										0	0	0
										0.1	0.1	0.1
										0	0	0
										0.1	0.1	0.1
										0.1	0.1	0.1
										0.1	0.1	0.1
										0	0	0
										0.1	0.1	0.1
										0.1	0.1	0.1
										0.1	0.1	0.1
										0.1	0.1	0.1
										0.1	0.1	0.1
										0.1	0.1	0.1
										0.1	0.1	0.1
										0.1	0.1	0.1
										0.1	0.1	0.1
										0	0	0
										0	0	0
										0	0	0
										0.1	0.1	0.1
										0	0	0
										0	0	0
										0	0	0
										0.1	0.1	0.1
										0	0	0
										0	0	0
										0	0	0
										0.1	0.1	0.1
										0.1	0.1	0.1
										0.1	0.1	0.1
										0.1	0.1	0.1
										0.1	0.1	0.1
										0.1	0.1	0.1
										0.1	0.1	0.1
										0	0	0
										0.1	0.1	0.1
										0.1	0.1	0.1
										0.1	0.1	0.1
										0	0	0
										0.1	0.1	0.1
										0.1	0.1	0.1
										0.1	0.1	0.1
										0	0	0
										0	0	0
										0	0	0
										0.1	0.1	0.1
										0.1	0.1	0.1
										0.1	0.1	0.1
										0.1	0.1	0.1
										0	0	0
										0.1	0.1	0.1
										0.1	0.1	0.1
										0	0	0
										0.1	0.1	0.1
										0.1	0.1	0.1
										0.1	0.1	0.1
										0.1	0.1	0.1
										0.1	0.1	0.1
										0.1	0.1	0.1
										0	0	0
										0	0	0
										0	0	0
										0	0	0
										0	0	0
										0.1	0.1	0.1
										0.1	0.1	0.1
										0.1	0.1	0.1
										0.1	0.1	0.1
										0	0	0
										0.1	0.1	0.1
										0.1	0.1	0.1
										0.1	0.1	0.1
										0	0	0
										0.1	0.1	0.1
										0	0	0
										0.1	0.1	0.1
										0.1	0.1	0.1
										0.1	0.1	0.1
										0	0	0
										0.1	0.1	0.1
										0.1	0.1	0.1
										0.1	0.1	0.1
										0.1	0.1	0.1
										0	0	0
										0.1	0.1	0.1
										0.1	0.1	0.1
										0	0	0
										0.1	0.1	0.1
										0	0	0
										0.1	0.1	0.1
										0.1	0.1	0.1
										0.1	0.1	0.1
										0.1	0.1	0.1
										0	0	0
										0.1	0.1	0.1
										0.1	0.1	0.1
										0.1	0.1	0.1
										0.1	0.1	0.1
										0	0	0
										0.1	0.1	0.1
										0.1	0.1	0.1
										0	0	0
										0.1	0.1	0.1
										0.1	0.1	0.1
										0.1	0.1	0.1
										0.1	0.1	0.1
										0.1	0.1	0.1
										0.1	0.1	0.1
										0.1	0.1	0.1
										0	0	0
										0.1	0.1	0.1
										0.1	0.1	0.1
										0	0	0
										0.1	0.1	0.1
										0.1	0.1	0.1
										0	0	0
										0.1	0.1	0.1
										0.1	0.1	0.1
										0.1	0.1	0.1
										0	0	0
										0	0	0
										0.1	0.1	0.1
										0.1	0.1	0.1
										0	0	0
										0.1	0.1	0.1
										0	0	0
										0	0	0
										0.1	0.1	0.1
										0.1	0.1	0.1
										0.1	0.1	0.1
										0.1	0.1	0.1
										0.1	0.1	0.1
										0	0	0
										0	0	0
										0.1	0.1	0.1
										0	0	0
										0.1	0.1	0.1
										0	0	0
										0.1	0.1	0.1
										0	0	0
										0.1	0.1	0.1
										0	0	0
	0	0	0	0	0	0	0	0	0	0	0	0
	0	0	0	0	0	0	0	0	0	0	0	0
	0	0	0	0	0	0	0	0	0	0	0	0
	0	0	0	0	0	0	0	0	0	0	0	0
	0	0	0	0	0	0	0	0	0	0	0	0
	0	0	0	0	0	0	0	0	0	0	0	0
	0	0	0	0	0	0	0	0	0	0	0	0
	0	0	0	0	0	0.1	0	0	0	0	0	0
	0	0	0	0	0	0	0	0	0	0	0	0
	0	0	0	0	0	0	0	0	0	0	0	0
	0	0	0	0	0	0	0	0	0	0	0	0
	0	0	0	0	0	0	0	0	0	0	0	0.1
	0	0	0	0	0	0	0	0	0	0	0	0
	0	0	0	0	0	0	0	0	0	0	0	0
	0	0	0	0	0	0.1	0	0	0	0	0	0
	0	0	0	0	0	0	0	0	0	0	0	0
	0	0	0	0	0	0	0	0	0	0	0	0
	0	0	0	0	0	0.1	0	0	0	0	0	0
	0	0	0	0	0	0	0	0	0	0	0	0
	0	0	0	0	0	0	0	0	0	0	0	0
	0	0	0	0	0	0	0	0	0	0	0	0
	0	0	0	0	0	0	0	0	0	0	0	0
	0	0	0	0	0	0	0	0	0	0	0	0
	0	0	0	0	0	0	0	0	0	0	0	0
	0	0	0	0	0	0	0	0	0	0	0	0
	0	0	0	0	0	0	0	0	0	0	0	0
	0	0	0	0	0	0.1	0	0	0	0	0	0
	0	0	0	0	0	0	0	0	0	0	0	0
	0	0	0	0	0	0	0	0	0	0	0	0
	0	0	0	0	0	0	0	0	0	0	0	0
	0	0	0	0	0	0	0	0	0	0	0	0
	0	0	0	0	0	0	0	0	0	0	0	0
	0	0	0	0	0	0	0	0	0	0	0	0
	0	0	0	0	0	0	0	0	0	0	0	0
	0	0	0	0	0	0	0	0	0	0	0	0
	0	0	0	0	0	0	0	0	0	0	0	0
	0	0	0	0	0	0	0	0	0	0	0	0
	0	0	0	0	0	0	0	0	0	0	0	0
	0	0	0	0	0	0	0	0	0	0	0	0
	0	0	0	0	0	0	0	0	0	0	0	0
	0	0	0	0	0	0	0	0	0	0	0	0
	0	0	0	0	0	0	0	0	0	0	0	0
	0	0	0	0	0	0	0	0	0	0	0	0
	0	0	0	0	0	0	0	0	0	0	0	0
	0	0	0	0	0	0	0	0	0	0	0	0
	0	0	0	0	0	0	0	0	0	0	0	0
	0	0	0	0	0	0	0	0	0	0	0	0
	0	0	0	0	0	0	0	0	0	0	0	0
	0	0	0	0	0	0	0	0	0	0	0	0
	0	0	0	0	0	0	0	0	0	0	0	0
	0	0	0	0	0	0	0	0	0	0	0	0
	0	0	0	0	0	0	0	0	0	0	0	0
	0	0	0	0	0	0	0	0	0	0	0	0
	0	0	0	0	0	0	0	0	0	0	0	0
	0	0	0	0	0	0	0	0	0	0	0	0
	0	0.1	0	0	0	0	0	0	0	0	0	0
	0	0	0	0	0	0	0	0	0	0	0	0
	0	0	0	0	0	0	0	0	0	0	0	0
	0	0	0	0	0	0	0	0	0	0	0	0
	0	0	0	0	0	0.1	0	0	0	0	0	0
	0	0	0	0	0	0	0	0	0	0	0	0
	0	0	0	0	0	0	0	0	0.1	0	0	0
	0	0	0	0	0	0	0	0	0	0	0	0
	0	0	0	0	0	0	0	0	0	0	0	0
	0	0	0	0	0	0	0	0	0	0	0	0
	0	0	0	0	0	0	0	0	0	0	0	0
	0	0	0	0	0	0	0	0	0	0	0	0
	0	0	0	0	0	0	0	0	0	0	0	0
	0	0	0	0	0	0	0	0	0	0	0	0
	0	0	0	0	0	0.1	0	0	0	0	0	0
	0	0	0	0	0	0	0	0	0	0	0	0
	0	0	0	0	0	0	0	0	0	0	0	0
	0	0	0	0	0	0	0	0	0	0	0	0
	0	0	0	0	0	0.1	0	0	0	0	0	0
	0	0	0	0	0	0	0	0	0	0	0	0
	0	0	0	0	0	0	0	0	0	0	0	0
	0	0	0	0	0	0	0	0	0	0	0	0
	0	0	0	0	0	0	0	0	0	0	0	0
	0	0	0	0	0	0	0	0	0	0	0	0
	0	0	0	0	0	0	0	0	0	0	0	0
	0	0	0	0	0	0	0	0	0	0	0	0
	0	0	0	0	0	0	0	0	0	0	0	0
	0	0	0	0	0	0	0	0	0	0	0	0
	0	0	0	0	0	0	0	0	0	0	0	0
	0	0	0	0	0	0	0	0	0.1	0	0	0
	0	0	0	0	0	0	0	0	0	0	0	0
	0	0	0	0	0	0	0	0	0	0	0	0
	0	0	0	0	0	0	0	0	0	0	0	0
	0	0	0	0	0	0	0	0	0	0	0	0
	0	0	0	0	0	0	0	0	0	0	0	0
	0	0	0	0	0	0	0	0	0	0	0	0
	0	0.1	0	0	0	0	0	0	0	0	0	0
	0	0	0	0	0	0	0	0	0	0	0	0
	0	0	0	0	0	0	0	0	0	0	0	0
	0	0	0	0	0	0	0	0	0	0	0	0
	0	0	0	0	0	0	0	0	0	0	0	0
	0	0	0	0	0	0	0	0	0	0	0	0
	0	0	0	0	0	0	0	0	0	0	0	0
	0	0	0	0	0	0	0	0	0	0	0	0
	0	0	0	0	0	0	0	0	0	0	0	0
	0	0	0	0	0	0	0	0	0.1	0	0	0
	0	0	0	0	0	0	0	0	0	0	0	0
	0	0	0	0	0	0	0	0	0	0	0	0
	0	0	0	0	0	0	0	0	0	0	0	0
	0	0	0	0	0	0	0	0	0.1	0	0	0
	0	0	0	0	0	0	0	0	0	0	0	0
	0	0	0	0	0	0	0	0	0	0	0	0
	0	0	0	0	0	0	0	0	0	0	0	0
	0	0	0	0	0	0	0	0	0	0	0	0
	0	0	0	0.2	0.5	0	0	0	0	0	0	0
	0	0	0	0	0	0	0	0	0.1	0	0	0
	0	0	0	0	0	0	0	0	0	0	0	0
	0	0	0	0	0	0	0	0	0	0	0	0
	0	0	0	0	0	0	0	0	0	0	0	0
	0	0	0	0	0	0	0	0	0	0	0	0
	0	0	0	0	0	0	0	0	0	0	0	0
	0	0	0	0	0	0	0	0	0	0	0	0
	0	0	0	0	0	0.1	0	0	0	0	0	0
	0	0	0	0	0	0	0	0	0	0	0	0
	0	0	0	0	0	0	0	0	0	0	0	0
	0	0	0	0	0	0	0	0	0	0	0	0
	0	0	0	0	0	0	0	0	0	0	0	0
	0	0	0	0	0	0	0	0	0	0	0	0
	0	0	0	0	0	0	0	0.1	0.1	0	0	0
	0	0	0	0	0	0	0	0	0	0	0	0
	0	0	0	0	0	0	0	0	0	0	0	0
	0	0	0	0	0	0	0	0	0	0	0	0
	0	0	0	0	0	0	0	0	0	0	0	0
	0	0	0	0	0	0.1	0	0	0	0	0	0
	0	0	0	0	0	0	0.4	0.5	0.1	0	0	0
	0	0	0	0	0	0	0	0	0	0	0	0
	0	0	0	0	0	0	0	0	0	0	0	0
	0	0	0	0	0	0	0	0	0	0	0	0
	0	0	0	0	0	0	0	0	0	0	0	0
	0	0	0	0	0	0	0	0	0	0	0	0
	0	0	0	0	0	0	0	0	0	0	0	0
	0	0	0	0	0	0	0	0	0	0	0	0
	0	0	0	0	0	0	0	0	0	0	0	0
	0	0	0	0	0	0	0	0	0	0	0	0
	0	0	0	0	0	0	0	0	0	0	0	0
	0	0	0	0	0	0	0	0	0	0	0	0
	0	0	0	0	0	0	0	0	0	0	0	0
	0	0	0	0	0	0	0	0	0	0	0	0
	0	0	0	0	0	0	0	0	0	0	0	0
	0	0	0	0	0	0	0	0	0	0	0	0
	0	0	0	0	0	0	0	0	0	0	0	0
	0	0	0	0	0	0	0	0	0	0	0	0
	0	0	0	0	0	0	0	0	0	0	0	0
	0	0	0	0	0	0	0	0	0.1	0	0	0
	0	0	0	0	0	0	0	0	0	0	0	0
	0	0	0	0	0	0	0	0	0	0	0	0
	0	0	0	0	0	0	0	0	0	0	0	0
	0	0	0	0	0	0	0	0	0	0	0	0
	0	0	0	0	0	0	0	0	0	0	0	0
	0	0	0	0	0	0	0	0	0	0	0	0
	0	0	0	0	0	0	0	0	0	0	0	0
	0	0	0	0	0	0	0	0	0	0	0	0
	0	0	0	0	0	0	0	0	0	0	0	0
	0	0	0	0	0	0	0	0	0	0	0	0
	0	0	0	0	0	0	0	0	0	0	0	0
	0	0	0	0	0	0	0	0	0.1	0	0	0
	0	0	0	0	0	0	0	0	0	0	0	0
	0	0	0	0	0	0	0	0	0	0	0	0
	0	0	0	0	0	0	0	0	0	0	0	0
	0	0	0	0	0	0	0	0	0	0	0	0
	0	0	0	0	0	0	0	0	0	0	0	0
	0	0	0	0	0	0	0	0	0	0	0	0
	0	0	0	0	0	0	0	0	0	0	0	0.1
	0	0	0	0	0	0	0	0	0.1	0	0	0
	0	0	0	0	0	0	0	0	0	0	0	0
	0	0	0	0	0	0	0	0	0	0	0	0
	0	0	0	0	0	0	0	0	0	0	0	0
	0	0	0	0	0	0	0	0	0	0	0	0
	0	0	0	0	0	0	0	0	0.1	0	0	0
	0	0	0	0	0	0.1	0	0	0	0	0	0
	0	0	0	0	0	0	0	0	0	0	0	0
	0	0	0	0	0	0	0	0	0	0	0	0
	0	0	0	0	0	0	0	0	0	0	0	0
	0	0	0	0	0	0	0	0	0	0	0	0
	0	0	0	0	0	0	0	0	0	0	0	0
	0	0	0	0	0	0	0	0	0	0	0	0
	0	0	0	0	0	0	0	0	0	0	0	0
	0	0	0	0	0	0	0	0	0	0	0	0
	0	0	0	0	0	0	0	0	0	0	0	0
	0	0	0	0	0	0	0	0	0	0	0	0
	0	0	0	0	0	0	0	0	0	0	0	0
	0	0	0	0	0	0	0	0	0.1	0	0	0
	0	0	0	0	0	0	0	0	0	0	0	0
	0	0	0	0	0	0	0	0	0	0	0	0
	0	0	0	0	0	0	0	0	0	0	0	0
	0	0	0	0	0	0	0	0	0	0	0	0
	0	0	0	0	0	0	0	0	0	0	0	0
	0	0	0	0	0	0	0	0	0	0	0	0
	0	0	0	0	0	0	0	0	0	0	0	0
	0	0	0	0	0	0	0	0	0	0	0	0
	0	0	0	0	0	0	0	0	0	0	0	0
	0	0	0	0	0	0	0	0	0	0	0	0
	0	0	0	0	0	0	0	0	0.1	0	0	0
	0	0	0	0	0	0	0	0	0	0	0	0.1
	0	0	0	0	0	0	0	0	0	0	0	0
	0	0	0	0	0	0	0	0	0	0	0	0
	0	0	0	0	0	0	0	0	0	0	0	0
	0	0	0	0	0	0	0	0	0	0	0	0
	0	0	0	0	0	0.1	0	0	0	0	0	0
	0	0	0	0	0	0.1	0	0	0	0	0	0
	0	0	0	0	0	0	0	0	0	0	0	0
	0	0	0	0	0	0	0	0	0	0	0	0
	0	0	0	0	0	0	0	0	0	0	0	0
	0	0	0	0	0	0	0	0	0	0	0	0
	0	0	0	0	0	0	0	0	0	0	0	0
	0	0	0	0	0	0	0	0	0	0	0	0
	0	0	0	0	0	0	0	0	0	0	0	0
	0	0	0	0	0	0	0	0	0	0	0	0
	0	0	0	0	0	0	0	0	0	0	0	0
	0	0	0	0	0	0	0	0	0.1	0	0	0
	0	0	0	0	0	0	0	0	0	0	0	0
	0	0	0	0	0	0	0	0	0	0	0	0
	0	0	0	0	0	0	0	0	0	0	0	0
	0	0	0	0	0	0	0	0	0	0	0	0
	0	0	0	0	0	0	0	0	0	0	0	0
	0	0	0	0	0	0	0	0	0	0	0	0
	0	0	0	0	0	0	0	0	0	0	0	0
	0	0	0	0	0	0	0	0	0.1	0	0	0
	0	0	0	0	0	0	0	0	0	0	0	0
	0	0	0.1	0	0	0.1	0	0.1	0	0	0	0.1
	0	0	0	0	0	0	0	0	0	0	0	0
	0	0	0	0	0	0	0	0	0	0	0	0
	0	0	0	0	0	0	0	0	0	0	0	0.1
	0	0	0	0	0	0.1	0	0	0	0	0	0
	0	0	0	0	0	0	0	0	0	0	0	0
	0	0	0	0	0	0	0	0	0	0	0	0.1
	0	0	0	0	0	0	0	0	0	0	0	0
	0	0	0	0	0	0.1	0	0	0	0	0	0
	0	0	0	0	0	0	0	0	0	0	0	0
	0	0	0	0	0	0	0	0	0	0	0	0.1
	0	0	0	0	0	0	0	0	0	0	0	0
	0	0	0	0	0	0	0	0	0	0	0	0
	0	0	0	0	0	0.1	0	0	0	0	0	0
	0	0	0	0	0	0	0	0	0	0	0	0
	0	0	0	0	0	0	0	0	0	0	0	0
	0	0	0	0	0	0	0	0.1	0.1	0	0	0
	0	0	0	0	0	0	0	0	0	0	0	0
	0	0	0	0	0	0	0	0	0	0	0	0
	0	0	0	0	0	0	0	0	0	0	0	0
	0	0	0	0	0	0	0	0	0	0	0	0
	0	0	0	0	0	0	0	0	0	0	0	0
	0	0	0	0	0	0	0	0	0	0	0	0
	0	0	0	0	0	0	0	0	0	0	0	0
	0	0	0	0	0	0	0	0	0	0	0	0
	0	0	0	0	0	0	0	0	0	0	0	0
	0	0	0	0	0	0	0	0	0	0	0	0
	0	0	0	0	0	0	0	0	0	0	0	0.1
	0	0	0	0	0	0	0	0	0	0	0	0
	0	0	0	0	0	0	0	0	0	0	0	0
	0	0	0	0	0	0	0	0	0	0	0	0
	0	0	0	0	0	0	0	0	0	0	0	0.1
	0	0	0	0	0	0	0	0	0	0	0	0
	0	0	0	0	0	0	0	0	0	0	0	0
	0	0	0	0	0	0	0	0	0	0	0	0
	0	0	0	0	0	0	0	0	0.1	0	0	0.1
	0	0	0	0	0	0	0	0	0	0	0	0.1
	0	0	0	0	0	0.1	0	0	0	0	0	0
	0	0	0	0	0	0	0	0	0	0	0	0
	0	0	0	0	0	0	0	0	0	0	0	0
	0	0	0	0	0	0	0	0	0	0	0	0
	0	0	0	0	0	0	0	0	0	0	0	0
	0	0	0	0	0	0	0	0	0	0	0	0.1
	0	0	0	0	0	0	0	0	0	0	0	0
	0	0	0	0	0	0	0	0	0	0	0	0.1
	0	0	0	0	0	0	0	0	0	0	0	0
	0	0	0	0	0	0	0	0	0	0	0	0
	0	0	0	0	0	0	0	0	0	0	0	0
	0	0	0	0	0	0	0	0	0	0	0	0
	0	0	0	0	0	0	0	0	0	0	0	0
	0	0	0	0	0	0	0	0	0	0	0	0
	0	0	0	0	0	0	0	0	0	0	0	0
	0	0	0	0	0	0	0	0	0	0	0	0
	0	0	0	0	0	0	0	0	0	0	0	0.1
	0	0	0	0	0	0	0	0	0	0	0	0
	0	0	0	0	0	0	0	0	0	0	0	0
	0	0	0	0	0	0	0	0.1	0	0	0	0.1
	0	0	0	0	0	0	0	0	0	0	0	0.1
	0	0	0	0	0	0	0	0	0	0	0	0
	0	0	0	0	0	0	0	0	0	0	0	0
	0	0	0	0	0	0	0	0	0	0	0	0
	0	0	0	0	0	0.1	0	0	0	0	0	0
	0	0	0	0	0	0	0	0	0	0	0	0
	0	0	0	0	0	0	0	0	0	0	0	0
	0	0	0	0	0	0	0	0	0.1	0	0	0
	0	0	0	0	0	0	0	0	0	0	0	0
	0	0	0	0	0	0	0	0	0	0	0	0
	0	0	0	0	0	0	0	0	0	0	0	0.1
	0	0	0	0	0	0	0	0	0	0	0	0
	0	0	0	0	0	0	0	0	0	0	0	0
	0	0	0	0	0	0	0	0	0	0	0	0
	0	0	0	0	0	0	0	0	0	0	0	0.1
	0	0	0	0	0	0	0	0	0	0	0	0
	0	0	0	0	0	0	0	0	0	0	0	0
	0	0	0	0	0	0	0	0	0	0	0	0
	0	0	0	0	0	0	0	0	0	0	0	0
	0	0	0	0	0	0	0	0	0	0	0	0
	0	0	0	0	0	0	0	0	0	0	0	0
	0	0	0	0	0	0.1	0	0	0	0	0	0
	0	0	0	0	0	0	0	0	0	0	0	0
	0	0	0	0	0	0	0	0	0	0	0	0
	0	0	0	0	0	0	0	0	0.1	0	0	0
	0	0	0	0	0	0	0	0	0	0	0	0
	0	0	0	0	0	0	0	0	0	0	0	0
	0	0	0	0	0	0	0	0	0	0	0	0
	0	0	0	0	0	0	0	0	0	0	0	0
	0	0	0	0	0	0	0	0	0	0	0	0.1
	0	0	0	0	0	0	0	0	0	0	0	0
	0	0	0	0	0	0	0	0	0	0	0	0
	0	0	0	0	0	0	0	0	0	0	0	0
	0	0	0	0	0	0	0	0	0	0	0	0
	0	0	0	0	0	0	0	0	0	0	0	0
	0	0	0	0	0	0	0	0	0	0	0	0
	0	0	0	0	0	0	0	0	0	0	0	0.1
	0	0	0	0	0	0	0	0	0	0	0	0
	0	0	0	0	0	0	0	0	0	0	0	0
	0	0	0	0	0	0	0	0	0	0	0	0
	0	0	0	0	0	0	0	0	0	0	0	0
	0	0	0	0	0	0	0	0	0	0	0	0
	0	0	0	0	0	0	0	0	0	0	0	0.1
	0	0	0	0	0	0	0	0	0	0	0	0
	0	0	0	0	0	0	0	0	0	0	0	0
	0	0	0	0	0	0	0	0	0	0	0	0
	0	0	0	0	0	0	0	0	0	0	0	0
	0	0.1	0	0	0	0	0	0	0	0	0	0
	0	0	0	0	0	0	0	0	0	0	0	0
	0	0	0	0	0	0	0	0	0	0	0	0
	0	0	0	0	0	0	0	0	0	0	0	0.1
	0	0	0	0	0	0	0	0	0	0	0	0
	0	0	0	0	0	0	0	0	0	0	0	0
	0	0	0	0	0	0	0	0	0	0	0	0
	0	0	0	0	0	0	0	0	0	0	0	0.1
	0	0	0	0	0	0	0	0	0	0	0	0
	0	0	0	0	0	0	0	0	0	0	0	0
	0	0	0	0	0	0	0	0	0	0	0	0
	0	0	0	0	0	0.1	0	0	0	0	0	0
	0	0	0	0	0	0	0	0	0	0	0	0
	0	0	0	0	0	0	0	0	0	0	0.1	0
	0	0	0	0	0	0.1	0	0	0	0	0	0
	0	0	0	0	0	0	0	0	0	0	0	0
	0	0	0	0	0	0	0	0	0	0	0	0
	0	0	0	0	0	0	0	0	0	0	0	0
	0	0	0	0	0	0	0	0	0	0	0	0
	0	0	0	0	0	0	0	0	0	0	0	0
	0	0	0	0	0	0	0	0	0	0	0	0
	0	0	0	0	0	0	0	0	0	0	0	0
	0	0	0	0	0	0	0	0	0	0	0	0.1
	0	0.1	0	0	0	0	0	0	0	0	0	0.1
	0	0	0	0	0	0	0	0	0	0	0	0
	0	0	0	0	0	0	0	0	0	0	0	0
	0	0	0	0	0	0	0	0	0	0	0	0
	0	0	0	0	0	0	0	0	0	0	0	0
	0	0	0	0	0	0	0	0	0	0	0	0
	0	0	0	0	0	0	0	0	0	0	0	0
	0	0	0	0	0	0	0	0	0	0	0	0.1
	0	0	0	0	0	0	0	0	0.1	0	0	0
	0	0	0	0	0	0	0	0	0	0	0	0
	0	0	0	0	0	0	0	0	0	0	0	0
	0	0	0	0	0	0	0	0	0	0	0	0
	0	0	0	0	0	0	0	0	0	0	0	0
	0	0	0	0	0	0	0	0	0	0	0	0
	0	0	0	0	0	0	0	0	0	0	0	0
	0	0	0	0	0	0	0	0	0	0	0	0.1
	0	0	0	0	0	0	0	0	0	0	0	0.1
	0	0	0	0	0	0	0	0	0	0	0	0.1
	0	0	0	0	0	0	0	0	0	0	0	0
	0	0	0	0	0	0	0	0	0	0	0	0
	0	0	0	0	0	0	0	0	0	0	0	0
	0	0	0	0	0	0	0	0	0	0	0	0
	0	0	0	0	0	0	0	0	0	0	0	0
	0	0	0	0	0	0	0	0	0	0	0	0
	0	0	0	0	0	0	0	0	0	0	0	0
	0	0	0	0	0	0	0	0	0	0	0	0
	0	0	0	0	0	0	0	0	0	0	0	0
	0	0	0	0	0	0	0	0	0	0	0	0
	0	0	0	0	0	0	0	0	0	0	0	0
	0	0	0	0	0	0	0	0	0	0	0	0
	0	0	0	0	0	0	0	0	0	0	0	0
	0	0	0	0	0	0	0	0	0	0	0	0
	0	0	0	0	0	0	0	0	0	0	0	0
	0	0.1	0	0	0	0	0	0	0	0	0	0
	0	0	0.1	0	0	0	0	0	0	0	0	0
	0	0	0	0	0	0	0	0	0	0	0	0
	0	0	0	0	0	0	0	0	0	0	0	0.1
	0	0	0	0	0	0	0	0	0	0	0	0
	0	0	0	0	0	0	0	0	0	0	0	0
	0	0	0	0	0	0	0	0	0	0	0	0
	0	0	0	0	0	0	0	0	0	0	0	0
	0	0	0	0	0	0	0	0	0	0	0	0
	0	0	0	0	0	0	0	0	0	0	0	0.1
	0	0	0	0	0	0	0	0	0	0	0	0
	0	0	0	0	0	0	0	0	0	0	0	0
	0	0	0	0	0	0	0	0	0	0	0	0
	0	0	0	0	0	0	0	0	0	0	0	0
	0	0	0	0	0	0	0	0	0	0	0	0
	0	0	0	0	0	0	0	0	0	0	0	0
	0	0	0	0	0	0	0	0	0	0	0	0
	0	0	0	0	0	0	0	0	0	0	0	0
	0	0	0	0	0	0	0	0	0	0	0	0
	0	0	0	0	0	0	0	0	0	0	0	0.1
	0	0	0	0	0	0	0	0	0	0	0	0
	0	0	0	0	0	0	0	0	0	0	0	0
	0	0	0	0	0	0	0	0	0	0	0	0
	0	0	0	0	0	0	0	0	0	0	0	0
	0	0	0	0	0	0	0	0	0	0	0	0
	0	0	0	0	0	0	0	0	0	0	0	0.1
	0	0	0	0	0	0	0	0	0	0	0	0.1
	0	0	0	0	0	0	0	0	0	0	0	0
	0	0	0	0	0	0	0	0	0	0	0	0
	0	0	0	0	0	0	0	0	0.1	0	0	0
	0	0	0	0	0	0	0	0	0.1	0	0	0
	0	0	0	0	0	0	0	0	0	0	0	0
	0	0	0	0	0	0	0	0	0	0	0	0
	0	0	0	0	0	0	0	0	0	0	0	0
	0	0	0	0	0	0.1	0	0	0	0	0	0
	0	0	0	0	0	0	0	0	0	0	0	0.1
	0	0	0	0	0	0	0	0	0	0	0	0.1
	0	0	0	0	0	0	0	0	0	0	0	0
	0	0	0	0	0	0	0	0	0	0	0	0
	0	0	0	0	0	0	0	0	0	0	0	0
	0	0	0	0	0	0	0	0	0	0	0	0
	0	0	0	0	0	0	0	0	0	0	0	0
	0	0	0	0	0	0	0	0	0	0	0	0
	0	0	0.1	0	0	0	0	0	0	0	0	0
	0	0	0	0	0	0	0	0	0	0	0	0
	0	0	0	0	0	0	0	0	0	0	0	0
	0	0	0	0	0	0	0	0	0	0	0	0
	0	0	0	0	0	0	0	0	0	0	0	0
	0	0	0	0	0	0	0	0	0	0	0	0
	0	0	0	0	0	0	0	0	0	0	0	0.1
	0	0	0	0	0	0	0	0	0	0	0	0
	0	0	0	0	0	0	0	0	0	0	0	0
	0	0	0	0	0	0.1	0	0	0	0	0	0.1
	0	0	0	0	0	0	0	0	0	0	0	0.1
	0	0	0	0	0	0	0	0	0	0	0	0
	0	0	0	0	0	0	0	0	0	0	0	0
	0	0	0	0	0	0	0	0	0	0	0	0
	0	0	0	0	0	0.1	0	0	0	0	0	0
	0	0	0	0	0	0	0	0	0	0	0	0
	0	0	0	0	0	0	0	0	0	0	0	0.1
	0	0	0	0	0	0	0	0	0	0	0	0
	0	0	0	0	0	0	0	0	0	0	0	0
	0	0	0	0	0	0	0	0	0	0	0	0
	0	0	0	0	0	0	0	0	0	0	0	0
	0	0	0	0	0	0	0	0	0	0	0	0
	0	0	0	0	0	0	0	0	0	0	0	0.1
	0	0	0	0	0	0	0	0	0	0	0	0
	0	0	0	0	0	0	0	0	0	0	0	0
	0	0	0	0	0	0	0	0	0	0	0	0
	0	0	0.1	0	0	0	0	0	0	0	0	0
	0	0	0	0	0	0	0	0	0	0	0	0.1
	0	0	0	0	0	0	0	0	0	0	0	0
	0	0	0	0	0	0	0	0	0	0	0	0.1
	0	0	0	0	0	0	0	0	0	0	0	0
	0	0	0	0	0	0	0	0	0	0	0	0
	0	0	0.1	0	0	0	0	0	0	0	0	0
	0	0	0	0	0	0	0	0	0	0	0	0
	0	0	0	0	0	0.1	0	0	0	0	0	0
	0	0	0	0	0	0	0	0	0	0	0	0
	0	0	0	0	0	0	0	0	0	0	0	0.1
	0	0	0	0	0	0	0	0	0	0	0	0
	0	0	0	0	0	0	0	0	0	0	0	0
	0	0	0	0	0	0	0	0	0	0	0	0
	0	0	0	0	0	0	0	0	0	0	0	0
	0	0	0	0	0	0	0	0	0	0	0	0
	0	0	0	0	0	0	0	0	0	0	0	0
	0	0	0	0	0	0	0	0	0	0	0	0
	0	0	0	0	0	0	0	0	0	0	0	0
	0	0	0	0	0	0	0	0	0	0	0	0
	0	0	0	0	0	0	0	0	0	0	0	0.1
	0	0	0	0	0	0	0	0	0	0	0	0
	0	0	0	0	0	0	0	0	0	0	0	0
	0	0	0	0	0	0	0	0	0	0	0	0
	0	0	0.1	0	0	0	0	0	0	0	0	0
	0	0	0	0	0	0	0	0	0	0	0	0.1
	0	0	0	0	0	0	0	0	0	0	0	0.1
	0	0	0	0	0	0	0	0	0	0	0	0
	0	0	0	0	0	0	0	0	0	0	0	0.1
	0	0	0	0	0	0	0	0	0	0	0	0
	0	0	0	0	0	0	0	0	0	0	0	0
	0	0	0	0	0	0	0	0	0	0	0	0
	0	0	0	0	0	0	0	0	0	0	0	0
	0	0	0	0	0	0	0	0	0	0	0	0
	0	0	0	0	0	0	0	0	0	0	0	0
	0	0	0	0	0	0	0	0	0	0	0	0.1
	0	0	0	0	0	0	0	0	0	0	0	0.1
	0	0	0	0	0	0	0	0	0	0	0	0.1
	0	0	0	0	0	0	0	0	0	0	0	0
	0	0	0	0	0	0.1	0	0	0	0	0	0
	0	0	0	0	0	0	0	0	0	0	0	0
	0	0	0	0	0	0	0	0	0	0	0	0
	0	0	0	0	0	0	0	0	0	0	0	0
	0	0	0	0	0	0	0	0	0	0	0	0
	0	0	0	0	0	0	0	0	0	0	0	0
	0	0	0	0	0	0	0	0	0	0	0	0.1
	0	0	0	0	0	0	0	0	0	0	0	0
	0	0	0	0	0.1	0	0	0	0	0	0	0.1
	0	0	0	0	0	0	0	0	0	0	0	0
	0	0	0	0	0	0	0	0	0	0	0	0
	0	0	0	0	0	0	0	0	0	0	0	0
	0	0	0	0	0	0	0	0	0	0	0	0
	0	0	0	0	0	0	0	0	0	0	0	0.1
	0	0	0	0	0	0	0	0	0	0	0	0
	0	0	0	0	0	0	0	0	0	0	0	0
	0	0	0	0	0	0.1	0	0	0	0	0	0
	0	0	0	0	0	0	0	0	0	0	0	0
	0	0	0	0	0	0	0	0	0	0	0	0.1
	0	0	0	0	0	0	0	0	0	0	0	0
	0	0	0	0	0	0	0	0	0	0	0	0.1
	0	0	0.1	0	0	0	0	0	0	0	0	0.1
	0	0	0	0	0	0	0	0	0	0	0	0.1
	0	0	0	0	0	0	0	0	0	0	0	0
	0	0	0	0.1	0.3	0	0	0	0	0	0	0
	0	0	0	0	0	0	0	0	0	0	0	0
	0	0	0	0	0	0	0	0	0	0	0	0
	0	0	0	0	0	0	0	0	0	0	0	0
	0	0	0	0	0	0	0	0	0	0	0	0
	0	0	0	0	0	0	0	0	0	0	0	0.1
	0	0	0	0	0	0	0	0	0	0	0	0
	0	0	0	0	0	0	0	0	0	0	0	0.1
	0	0	0	0	0	0	0	0	0	0	0	0
	0	0	0	0	0	0	0	0	0	0	0	0
	0	0	0	0	0	0	0	0	0	0	0	0.1
	0	0	0	0	0.1	0.1	0	0	0	0	0	0
	0	0	0.1	0	0	0	0	0	0	0	0	0
	0	0	0	0	0	0	0	0	0	0	0	0.1
	0	0	0	0	0	0	0	0	0	0	0	0
	0	0	0	0	0	0	0	0	0	0	0	0.1
	0	0	0	0	0	0	0	0	0	0	0	0
	0	0	0	0	0	0	0	0	0	0	0	0.1
	0	0	0	0	0	0.1	0	0	0	0	0	0
	0	0	0.1	0	0	0	0	0	0	0	0	0.1
	0	0	0	0	0	0	0	0	0	0	0	0
	0	0	0	0	0	0	0	0	0	0	0	0.1
	0	0	0	0	0	0	0	0	0	0	0	0
	0	0	0	0	0	0	0	0	0	0	0	0
	0	0	0	0	0	0	0	0	0	0	0	0
	0	0	0	0	0	0	0	0	0	0	0	0.1
	0	0	0	0	0	0	0	0	0	0	0	0
	0	0	0	0	0	0	0	0	0	0	0	0
	0	0	0	0	0	0	0	0	0	0	0	0
	0	0	0	0	0	0	0	0	0	0	0	0.1
	0	0	0	0	0	0	0	0	0	0	0	0
	0	0	0	0	0	0	0	0	0	0	0	0
	0	0	0	0	0	0	0	0	0	0	0	0
	0	0	0	0	0	0	0	0	0	0	0	0.1
	0	0	0	0	0	0	0	0	0	0	0	0
	0	0	0	0	0	0	0	0	0	0	0	0
	0	0	0	0	0	0	0	0	0	0	0	0
	0	0	0	0	0	0	0	0	0	0	0	0.1
	0	0	0	0	0	0.1	0	0	0	0	0	0
	0	0	0	0	0	0	0	0	0	0	0	0.1
	0	0	0	0	0	0	0	0	0	0	0	0.1
	0	0	0	0	0	0	0	0	0	0	0	0
	0	0	0	0	0	0	0	0	0	0	0	0.1
	0	0	0.1	0	0	0	0	0	0	0	0	0.1
	0	0	0	0	0	0	0	0	0	0	0	0.1
	0	0	0	0	0	0	0	0	0	0	0	0
	0	0	0	0	0	0	0	0	0	0	0	0.1
	0	0	0	0	0	0.1	0	0	0	0	0	0.1
	0	0	0	0	0	0	0	0	0	0	0	0.1
	0	0	0	0	0	0	0	0	0	0	0	0
	0	0	0	0	0	0	0	0	0	0	0	0
	0	0	0	0	0	0	0	0	0	0	0	0.1
	0	0	0	0	0	0	0	0	0	0	0	0
	0	0	0	0	0	0.1	0	0	0	0	0	0.1
	0	0	0	0	0	0	0	0	0	0	0	0
	0	0	0	0	0	0	0	0	0	0	0	0
	0	0	0	0	0	0	0	0	0	0	0	0.1
	0	0	0	0	0	0	0	0	0	0	0	0
	0	0	0	0	0	0	0	0	0	0	0	0
	0	0	0.1	0	0	0	0	0	0	0	0	0
	0	0	0	0	0	0	0	0	0	0	0	0
	0	0	0	0	0	0	0	0	0	0	0	0
	0	0	0	0	0	0	0	0	0	0	0	0
	0	0	0	0	0	0	0	0	0	0	0	0
	0	0	0	0	0	0	0	0	0	0	0	0.1
	0	0	0	0	0	0	0	0	0	0	0	0
	0	0	0	0	0	0.1	0	0	0	0	0	0
	0	0	0	0	0	0	0	0	0	0	0	0
	0	0.1	0	0	0	0	0	0	0	0	0	0
	0	0	0	0	0	0	0	0	0	0	0	0.1
	0	0	0	0	0	0	0	0	0	0	0	0
	0	0	0	0	0	0	0	0	0	0	0	0
	0	0	0	0	0	0	0	0	0	0	0	0
	0	0	0	0	0	0	0	0	0	0	0	0.1
	0	0	0	0	0	0	0	0	0	0	0	0
	0	0	0	0	0	0	0	0	0	0	0	0.1
	0	0	0	0	0	0	0	0	0	0	0	0.1
	0	0	0	0	0	0	0	0	0	0	0	0.1
	0	0	0	0	0	0	0	0	0	0	0	0
	0	0	0	0	0	0	0	0	0	0	0	0
	0	0	0	0	0	0.1	0	0	0	0	0	0.1
	0	0	0	0	0	0	0	0	0	0	0	0
	0	0	0	0	0	0	0	0	0	0	0	0.1
	0	0	0	0	0	0	0	0	0	0	0	0
	0	0	0	0	0	0	0	0	0	0	0	0
	0	0	0	0	0	0	0	0	0	0	0	0.1
	0	0	0	0	0	0	0	0	0	0	0	0.1
	0	0	0	0	0	0	0	0	0	0	0	0
	0	0	0	0	0	0	0	0	0	0	0	0.1
	0	0	0	0	0	0	0	0	0	0	0	0.1
	0	0	0	0	0	0.1	0	0	0	0	0	0.1
	0	0	0	0	0	0	0	0	0	0	0	0
	0	0	0	0	0	0	0	0	0	0	0	0
	0	0	0	0	0	0	0	0	0	0	0	0
	0	0	0	0	0	0	0	0	0	0	0	0
	0	0	0	0	0	0.1	0	0	0	0	0	0
	0	0	0	0	0	0	0	0	0	0	0	0.1
	0	0	0	0	0	0.1	0	0	0	0	0	0.1
	0	0	0	0	0	0	0	0	0	0	0	0
	0	0	0	0	0	0	0	0	0	0	0	0.1
	0	0	0	0	0	0	0	0	0	0	0	0
	0	0	0	0	0	0	0	0	0	0	0	0
	0	0	0	0	0	0	0	0	0	0	0	0.1
	0	0	0	0	0	0	0	0	0	0	0	0.1
	0	0	0	0	0	0	0	0	0	0	0	0
	0	0	0	0	0	0	0	0	0	0	0	0
	0	0	0	0	0	0	0	0	0	0	0	0
	0	0	0	0	0	0	0	0	0	0	0	0
	0	0	0	0	0	0.1	0	0	0	0	0	0.1
	0	0	0	0	0	0	0	0	0	0	0	0.1
	0	0	0	0	0	0.1	0	0	0	0	0	0.1
	0	0	0	0	0	0	0	0	0	0	0	0.1
	0	0	0	0	0	0	0	0	0	0	0	0.1
	0	0	0	0	0	0	0	0	0	0	0	0.1
	0	0	0	0	0	0	0	0	0	0	0	0
	0	0	0	0	0	0	0	0	0	0	0	0.1
	0	0	0	0	0	0	0	0	0	0	0	0
	0	0	0	0	0	0	0	0	0	0	0	0.1
	0	0	0	0	0	0	0	0	0	0	0	0.1
	0	0	0	0	0	0	0	0	0	0	0	0
	0	0	0	0	0	0	0	0	0	0	0	0
	0	0	0	0	0	0	0	0	0	0	0	0
	0	0	0	0	0	0	0	0	0	0	0	0
	0	0	0	0	0	0	0	0	0	0	0	0.1
	0	0	0	0	0	0	0	0	0	0	0	0
	0	0	0	0	0	0	0	0	0	0	0	0.1
	0	0	0	0	0	0	0	0	0	0	0	0
	0	0	0	0	0	0	0	0	0	0	0	0.1
	0	0	0	0	0	0	0	0	0	0	0	0
	0	0	0	0	0	0	0	0	0	0	0	0.1
	0	0	0	0	0	0	0	0	0	0	0	0
	0	0	0	0	0	0	0	0	0	0	0	0.1
	0	0	0	0	0	0	0	0	0	0	0	0
	0	0	0	0	0	0	0	0	0	0	0	0
	0	0	0	0	0	0	0	0	0	0	0	0.1
	0	0	0	0	0	0	0	0	0	0	0	0.1
	0	0	0	0	0	0	0	0	0	0	0	0
	0	0	0	0	0	0	0	0	0	0	0	0
	0	0	0	0	0	0	0	0	0	0	0	0.1
	0	0	0	0	0	0	0	0	0	0	0	0
	0	0	0	0	0	0	0	0	0	0	0	0
	0	0	0	0	0	0	0	0	0	0	0	0
	0	0	0	0	0	0	0	0	0	0	0	0
	0	0	0.1	0	0	0	0	0	0	0	0	0
	0	0	0	0	0	0	0	0	0	0	0	0.1
	0	0	0	0	0	0	0	0	0	0	0	0
	0	0	0	0	0	0	0	0	0	0	0	0
	0	0	0	0	0	0	0	0	0	0	0	0.1
	0	0	0	0	0	0	0	0	0	0	0	0.1
	0	0	0	0	0	0	0	0	0	0	0	0
	0	0	0	0	0	0	0	0	0	0	0	0.1
	0	0	0.1	0	0	0	0	0	0	0	0	0
	0	0	0	0	0	0	0	0	0	0	0	0.1
	0	0	0	0	0	0	0	0	0	0	0	0
	0	0	0	0	0	0	0	0	0	0	0	0.1
	0	0	0	0	0	0	0	0	0	0	0	0.1
	0	0	0	0	0	0	0	0	0	0	0	0.1
	0	0	0	0	0	0	0	0	0	0	0	0
	0	0	0	0	0	0	0	0	0	0	0	0
	0	0	0	0	0	0	0	0	0	0	0	0
	0	0	0	0	0	0	0	0	0	0	0	0.1
	0	0	0	0	0	0	0	0	0	0	0	0.1
	0	0	0	0	0	0	0	0	0	0	0	0.1
	0	0	0	0	0	0	0	0	0	0	0	0
	0	0	0	0	0	0	0	0	0	0	0	0
	0	0	0	0	0	0	0	0	0	0	0	0.1
	0	0	0	0	0	0	0	0	0	0	0	0
	0	0	0	0	0	0	0	0	0	0	0	0
	0	0	0	0	0	0	0	0	0	0	0	0.1
	0	0	0	0	0	0	0	0	0	0	0	0
	0	0	0	0	0	0	0	0	0	0	0	0.1
	0	0	0	0	0	0	0	0	0	0	0	0
	0	0	0	0	0	0	0	0	0	0	0	0
	0	0	0	0	0	0	0	0	0	0	0	0.1
	0	0	0	0	0	0	0	0	0	0	0	0.1
	0	0	0	0	0	0	0	0	0	0	0	0
	0	0	0	0	0	0	0	0	0	0	0	0.1
	0	0	0	0	0	0	0	0	0	0	0	0
	0	0	0	0	0	0	0	0	0	0	0	0
	0	0	0	0	0	0	0	0	0	0	0	0
	0	0	0	0	0	0	0	0	0	0	0	0
	0	0	0	0	0	0	0	0	0	0	0	0
	0	0	0	0	0	0	0	0	0	0	0	0
	0	0	0	0	0	0	0	0	0	0	0	0.1
	0	0	0	0	0	0	0	0	0	0	0	0
	0	0	0	0	0	0	0	0	0	0	0	0
	0	0	0	0	0	0	0	0	0	0	0	0.1
	0	0	0	0	0	0	0	0	0	0	0	0
	0	0	0	0	0	0	0	0	0	0	0	0
	0	0	0	0	0	0	0	0	0	0	0	0
	0	0.1	0	0	0	0	0	0	0	0	0	0.1
	0	0	0	0	0	0	0	0	0	0	0	0.1
	0	0	0	0	0	0	0	0	0	0	0	0
	0	0	0	0	0	0	0	0	0	0	0	0
	0	0	0	0	0	0	0	0	0	0	0	0
	0	0	0.1	0	0	0	0	0	0	0	0	0
	0	0	0	0	0	0	0	0	0	0	0	0
	0	0	0	0	0	0	0	0	0	0	0	0
	0	0	0	0	0	0	0	0	0	0	0	0
	0	0	0	0	0	0	0	0	0	0	0	0
	0	0	0	0	0	0	0	0	0	0	0	0
	0	0	0	0	0	0	0	0	0	0	0	0
	0	0	0	0	0	0	0	0	0	0	0	0.1
	0	0	0.1	0	0	0	0	0	0	0	0	0
	0	0	0	0	0	0	0	0	0	0	0	0
	0	0	0	0	0	0	0	0	0	0	0	0
	0	0	0	0	0	0	0	0	0	0	0	0
	0	0	0	0	0	0	0	0	0	0	0	0.1
	0	0	0	0	0	0	0	0	0	0	0	0.1
	0	0	0	0	0	0	0	0	0	0	0	0
	0	0	0	0	0	0	0	0	0	0	0	0.1
	0	0	0	0	0	0	0	0	0	0	0	0.1
	0	0	0	0	0	0	0	0	0	0	0	0.1
	0	0	0	0	0	0	0	0	0	0	0	0
	0	0	0	0	0	0	0	0	0	0	0	0.1
	0	0	0.1	0	0	0	0	0	0	0	0	0
	0	0	0	0	0	0	0	0	0	0	0	0
	0	0	0	0	0	0	0	0	0	0	0	0.1
	0	0	0	0	0	0	0	0	0	0	0	0
	0	0	0	0	0	0	0	0	0	0	0	0
	0	0	0	0	0	0	0	0	0	0	0	0
	0	0	0	0	0	0	0	0	0	0	0	0.1
	0	0	0	0	0	0	0	0	0	0	0	0
	0	0	0	0	0	0	0	0	0	0	0	0.1
	0	0	0	0	0	0	0	0	0	0	0	0.1
	0	0	0	0	0	0	0	0	0	0	0	0.1
	0	0	0	0	0	0	0	0	0	0	0	0
	0	0	0	0	0	0	0	0	0	0	0	0
	0	0	0	0	0	0	0	0	0	0	0	0
	0	0	0	0	0	0	0	0	0	0	0	0.1
	0	0	0	0	0	0	0	0	0	0	0	0.1
	0	0	0	0	0	0	0	0	0	0	0	0
	0	0	0	0	0	0	0	0	0	0	0	0
	0	0	0	0	0	0	0	0	0	0	0	0.1
	0	0	0	0	0	0	0	0	0	0	0	0.1
	0	0	0	0	0	0	0	0	0	0	0	0
	0	0	0	0	0	0	0	0	0	0	0	0
	0	0	0	0	0	0	0	0	0	0	0	0
	0	0	0	0	0	0	0	0	0	0	0	0
	0	0	0	0	0	0	0	0	0	0	0	0
	0	0	0	0	0	0	0	0	0	0	0	0
	0	0	0	0	0	0	0	0	0	0	0	0.1
	0	0	0	0	0	0	0	0	0	0	0	0.1
	0	0	0	0	0	0	0	0	0	0	0	0.1
	0	0	0.1	0	0	0	0	0	0	0	0	0.1
	0	0	0	0	0	0	0	0	0	0	0	0
	0	0	0	0	0	0	0	0	0	0	0	0.1
	0	0	0	0	0	0	0	0	0	0	0	0.1
	0	0	0	0	0	0	0	0	0	0	0	0
	0	0	0	0	0	0	0	0	0	0	0	0.1
	0	0	0	0	0	0	0	0	0	0	0	0
	0	0	0	0	0	0	0	0	0	0	0	0
	0	0	0	0	0	0	0	0	0	0	0	0
	0	0	0	0	0	0	0	0	0	0	0	0.1
	0	0	0.1	0	0	0	0	0	0	0	0	0
	0	0	0	0	0	0	0	0	0	0	0	0
	0	0	0	0	0	0	0	0	0	0	0	0
	0	0	0	0	0	0	0	0	0	0	0	0.1
	0	0	0	0	0	0	0	0	0	0	0	0.1
	0	0	0	0	0	0	0	0	0	0	0	0
	0	0	0	0	0	0	0	0	0	0	0	0
	0	0	0	0	0	0	0	0	0	0	0	0.1
	0	0	0	0	0	0	0	0	0	0	0	0.1
	0	0	0	0	0	0	0	0	0	0	0	0.1
	0	0	0	0	0	0	0	0	0	0	0	0
	0	0	0	0	0	0	0	0	0	0	0	0
	0	0	0	0	0	0	0	0	0	0	0	0
	0	0	0	0	0	0	0	0	0	0	0	0
	0	0	0	0	0	0	0	0	0	0	0	0
	0	0	0	0	0	0	0	0	0	0	0	0
	0	0	0	0	0	0	0	0	0	0	0	0.1
	0	0	0	0	0	0	0	0	0	0	0	0.1
	0	0	0	0	0	0	0	0	0	0	0	0
	0	0	0.1	0	0	0	0	0	0	0	0	0.1
	0	0	0	0	0	0	0	0	0	0	0	0
	0	0	0.1	0	0	0	0	0	0	0	0	0.1
	0	0	0	0	0	0	0	0	0	0	0	0.1
	0	0	0	0	0	0	0	0	0	0	0	0
	0	0	0.1	0	0	0	0	0	0	0	0	0.1
	0	0	0	0	0	0	0	0	0	0	0	0.1
	0	0	0	0	0	0	0	0	0	0	0	0.1
	0	0	0	0	0	0	0	0	0	0	0	0.1
	0	0	0	0	0	0	0	0	0	0	0	0.1
	0	0	0	0	0	0	0	0	0	0	0	0
	0	0	0	0	0	0	0	0	0	0	0	0.1
	0	0	0.1	0	0	0	0	0	0	0	0	0.1
	0	0	0	0	0	0	0	0	0	0	0	0
	0	0	0	0	0	0	0	0	0	0	0	0.1
	0	0	0	0	0	0	0	0	0	0	0	0
	0	0	0	0	0	0	0	0	0	0	0	0
	0	0	0	0	0	0	0	0	0	0	0	0
	0	0	0	0	0	0	0	0	0	0	0	0
	0	0	0.1	0	0	0	0	0	0	0	0	0.1
	0	0	0	0	0	0	0	0	0	0	0	0.1
	0	0	0	0	0	0	0	0	0	0	0	0.1
	0	0	0	0	0	0	0	0	0	0	0	0
	0	0	0	0	0	0	0	0	0	0	0	0.1
	0	0	0	0	0	0	0	0	0	0	0	0.1
	0	0	0	0	0	0	0	0	0	0	0	0.1
	0	0	0	0	0	0	0	0	0	0	0	0
	0	0	0	0	0	0	0	0	0	0	0	0.1
	0	0	0	0	0	0	0	0	0	0	0	0
	0	0	0	0	0	0	0	0	0	0	0	0.1
	0	0	0	0	0	0	0	0	0	0	0	0.1
	0	0	0	0	0	0	0	0	0	0	0	0
	0	0	0	0	0	0	0	0	0	0	0	0
	0	0	0	0	0	0	0	0	0	0	0	0.1
	0	0	0	0	0	0	0	0	0	0	0	0.1
	0	0	0	0	0	0	0	0	0	0	0	0.1
	0	0	0	0	0	0	0	0	0	0	0	0
	0	0	0	0	0	0	0	0	0	0	0	0
	0	0	0	0	0	0	0	0	0	0	0	0.1
	0	0	0	0	0	0	0	0	0	0	0	0
	0	0	0	0	0	0	0	0	0	0	0	0.1
	0	0	0	0	0	0	0	0	0	0	0	0
	0	0	0	0	0	0	0	0	0	0	0	0
	0	0	0	0	0	0	0	0	0	0	0	0
	0	0	0	0	0	0	0	0	0	0	0	0
	0	0	0	0	0	0	0	0	0	0	0	0.1
	0	0	0	0	0	0	0	0	0	0	0	0
	0	0	0	0	0	0	0	0	0	0	0	0.1
	0	0	0	0	0	0	0	0	0	0	0	0.1
	0	0	0	0	0	0	0	0	0	0	0	0.1
	0	0	0	0	0	0	0	0	0	0	0	0
	0	0	0	0	0	0	0	0	0	0	0	0
	0	0	0	0	0	0	0	0	0	0	0	0
	0	0	0.1	0	0	0	0	0	0	0	0	0.1
	0	0	0	0	0	0	0	0	0	0	0	0.1
	0	0	0	0	0	0	0	0	0	0	0	0.1
	0	0	0	0	0	0	0	0	0	0	0	0
	0	0	0	0	0	0	0	0	0	0	0	0.1
	0	0	0	0	0	0	0	0	0	0	0	0.1
	0	0	0	0	0	0	0	0	0	0	0	0.1
	0	0	0	0	0	0	0	0	0	0	0	0
	0	0	0	0	0	0	0	0	0	0	0	0
	0	0	0	0	0	0	0	0	0	0	0	0
	0	0	0	0	0	0	0	0	0	0	0	0.1
	0	0	0.1	0	0	0	0	0	0	0	0	0
	0	0	0	0	0	0	0	0	0	0	0	0.1
	0	0	0	0	0	0	0	0	0	0	0	0.1
	0.1	0.3	0	0	0	0	0	0	0	0	0	0
	0	0	0	0	0	0	0	0	0	0	0	0.1
	0	0	0	0	0	0	0	0	0	0	0	0.1
	0	0	0	0	0	0	0	0	0	0	0	0
	0	0	0	0	0	0	0	0	0	0	0	0.1
	0	0	0	0	0	0	0	0	0	0	0	0.1
	0	0	0	0	0	0	0	0	0	0	0	0
	0	0	0	0	0	0	0	0	0	0	0	0.1
	0	0	0	0	0	0	0	0	0	0	0	0
	0	0	0.1	0	0	0	0	0	0	0	0	0.1
	0	0	0	0	0	0	0	0	0	0	0	0.1
	0	0	0	0	0	0	0	0	0	0	0	0.1
	0	0	0	0	0	0	0	0	0	0	0	0
	0	0	0	0	0	0	0	0	0	0	0	0.1
	0	0	0	0	0	0	0	0	0	0	0	0
	0	0	0	0	0	0	0	0	0	0	0	0
	0	0	0	0	0	0	0	0	0	0	0	0
	0	0	0	0	0	0	0	0	0	0	0	0.1
	0	0	0	0	0	0	0	0	0	0	0	0.1
	0	0	0	0	0	0	0	0	0	0	0	0
	0	0	0	0	0	0	0	0	0	0	0	0
	0	0	0	0	0	0	0	0	0	0	0	0.1
	0	0	0	0	0	0	0	0	0	0	0	0.1
	0	0	0	0	0	0	0	0	0	0	0	0
	0	0	0.1	0	0	0	0	0	0	0	0	0
	0	0	0	0	0	0	0	0	0	0	0	0.1
	0	0	0	0	0	0	0	0	0	0	0	0
	0	0	0	0	0	0	0	0	0	0	0	0
	0	0	0	0	0	0	0	0	0	0	0	0.1
	0	0	0.1	0	0	0	0	0	0	0	0	0.1
	0	0	0	0	0	0	0	0	0	0	0	0.1
	0	0	0	0	0	0	0	0	0	0	0	0.1
	0	0	0	0	0	0	0	0	0	0	0	0
	0	0	0.1	0	0	0	0	0	0	0	0	0
	0	0	0	0	0	0	0	0	0	0	0	0.1
	0	0	0	0	0	0	0	0	0	0	0	0
	0	0	0	0	0	0	0	0	0	0	0	0
	0	0	0	0	0	0	0	0	0	0	0	0.1
[truncated: 217 more rows]

## Sheet: gravel Blank
ug/m^3	4ms	1/8
PM	10	2.5	1	10	2.5	1	10	2.5	1	10	2.5	1
	0	0	0	0	0	0	0	0	0	0	0	0
	0	0	0	0	0	0	0	0	0	0	0	0
	0	0	0	0	0	0	0	0	0	0	0	0
	0	0	0	0.1	0.1	0.1	0	0	0	0	0	0
	0	0	0	0	0	0	0	0	0	0.3	0.3	0
	0	0	0	0	0	0	0	0	0	0	0	0
	0	0	0	0	0	0	0	0	0	0	0	0
	0	0	0	0.1	0.1	0	0	0	0	0	0	0
	0	0	0	0	0	0	0	0	0	0	0	0
	0	0	0	0	0	0	0	0	0	0.1	0.1	0.1
	0	0	0	0	0	0	0	0	0	0	0	0
	0	0	0	0	0	0	0	0	0	0	0	0
	0	0	0	0.9	0.6	0	0	0	0	0	0	0
	0	0	0	0	0	0	0	0	0	0	0	0
	0	0	0	0	0	0	0	0	0	0	0	0
	0	0	0	0	0	0	0	0	0	0	0	0
	0	0	0	0	0	0	0	0	0	0	0	0
	0	0	0	0.4	0.3	0	0	0	0	0	0	0
	0	0	0	0	0	0	0	0	0	0	0	0
	0	0	0	0	0	0	0	0	0	0	0	0
	0	0	0	0.1	0.1	0.1	0	0	0	0	0	0
	0	0	0	0	0	0	0	0	0	0	0	0
	0	0	0	0	0	0	0	0	0	0	0	0
	0	0	0	0	0	0	0	0	0	0	0	0
	0.1	0.1	0	0	0	0	0	0	0	0	0	0
	0	0	0	0	0	0	0	0	0	0	0	0
	0.1	0.1	0.1	0	0	0	0	0	0	0	0	0
	0	0	0	0	0	0	0	0	0	0	0	0
	0	0	0	0	0	0	0	0	0	0	0	0
	0.9	0.6	0	0	0	0	0	0	0	0	0	0
	0.1	0.1	0.1	0	0	0	0	0	0	0	0	0
	0	0	0	0	0	0	0	0	0	0	0	0
	0	0	0	0	0	0	0	0	0	0	0	0
	0	0	0	0	0	0	0.2	0.2	0.1	0	0	0
	0	0	0	0	0	0	0	0	0	0	0	0
	0	0	0	0	0	0	0	0	0	0	0	0
	0	0	0	0	0	0	0	0	0	0	0	0
	0	0	0	0.1	0.1	0.1	0	0	0	0	0	0
	0	0	0	0	0	0	0.4	0.3	0	0	0	0
	0	0	0	0	0	0	0	0	0	0	0	0
	0	0	0	0	0	0	0	0	0	0	0	0
	0	0	0	0	0	0	0	0	0	0	0	0
	0	0	0	0	0	0	0	0	0	0	0	0
	0	0	0	0	0	0	0	0	0	0	0	0
	0	0	0	0	0	0	0	0	0	0	0	0
	0.9	0.6	0	0	0	0	0	0	0	0	0	0
	0	0	0	0	0	0	0	0	0	0	0	0
	0	0	0	0	0	0	0	0	0	0	0	0
	0	0	0	0	0	0	0	0	0	0	0	0
	1	0.6	0.1	0	0	0	0	0	0	0	0	0
	0	0	0	0	0	0	0.1	0.1	0.1	0	0	0
	0.1	0.1	0.1	0	0	0	0	0	0	0	0	0
	0	0	0	0	0	0	0	0	0	0	0	0
	0	0	0	0	0	0	0	0	0	0	0	0
	0.7	0.6	0.1	0	0	0	0	0	0	0	0	0
	0	0	0	0	0	0	0	0	0	0	0	0
	0	0	0	0	0	0	0	0	0	0	0	0
	0	0	0	0	0	0	0	0	0	0	0	0
	0	0	0	0	0	0	0	0	0	0	0	0
	0	0	0	0	0	0	0	0	0	0	0	0
	0	0	0	0	0	0	0	0	0	0	0	0
	0	0	0	0	0	0	0	0	0	0	0	0
	0.1	0.1	0.1	0	0	0	0	0	0	0	0	0
	0	0	0	0	0	0	0	0	0	0	0	0
	0	0	0	0	0	0	0	0	0	0	0	0
	0	0	0	0	0	0	0	0	0	0.1	0.1	0.1
	0	0	0	0	0	0	0	0	0	0	0	0
	0.1	0.1	0.1	0	0	0	0	0	0	0	0	0
	0	0	0	0	0	0	0	0	0	0	0	0
	0	0	0	0	0	0	0	0	0	0.1	0.1	0.1
	0	0	0	0	0	0	0.1	0.1	0.1	0	0	0
	0	0	0	0.1	0.1	0.1	0	0	0	0	0	0
	0	0	0	0	0	0	0	0	0	0	0	0
	0	0	0	0	0	0	0	0	0	0.1	0.1	0.1
	0	0	0	0	0	0	0.4	0.3	0	0	0	0
	0	0	0	0	0	0	0	0	0	0	0	0
	0	0	0	0	0	0	0	0	0	0	0	0
	0	0	0	0	0	0	0	0	0	0	0	0
	0	0	0	0	0	0	0.1	0.1	0.1	0	0	0
	0	0	0	0	0	0	0	0	0	0	0	0
	0	0	0	0	0	0	0	0	0	0	0	0
	0	0	0	0	0	0	0.1	0.1	0.1	0	0	0
	0	0	0	0	0	0	0	0	0	0	0	0
	0.1	0.1	0.1	0	0	0	0.1	0.1	0.1	0	0	0
	0	0	0	0	0	0	0	0	0	0	0	0
	0.9	0.6	0	0	0	0	0	0	0	0	0	0
	0	0	0	0	0	0	0	0	0	0	0	0
	0.1	0.1	0.1	0	0	0	0	0	0	0	0	0
	0	0	0	0	0	0	0	0	0	0	0	0
	0	0	0	0	0	0	0	0	0	0	0	0
	0	0	0	0	0	0	0	0	0	0.1	0.1	0.1
	0	0	0	0	0	0	0	0	0	0	0	0
	0	0	0	0	0	0	0	0	0	0	0	0
	0	0	0	0	0	0	0	0	0	0	0	0
	0	0	0	0	0	0	0	0	0	0	0	0
	0	0	0	0	0	0	0	0	0	0	0	0
	0	0	0	0.1	0.1	0.1	0	0	0	0	0	0
	0	0	0	0	0	0	0	0	0	0	0	0
	0	0	0	0	0	0	0	0	0	0	0	0
	0	0	0	0	0	0	0	0	0	0	0	0
	0	0	0	0	0	0	0	0	0	0	0	0
	0	0	0	0.1	0.1	0	0.1	0.1	0.1	0	0	0
	0.1	0.1	0.1	0	0	0	0.1	0.1	0	0	0	0
	0.1	0.1	0.1	0	0	0	0	0	0	0	0	0
	0	0	0	0	0	0	0	0	0	0	0	0
	0	0	0	0	0	0	0	0	0	0	0	0
	0	0	0	0	0	0	0	0	0	0	0	0
	0	0	0	0	0	0	0	0	0	0	0	0
	0	0	0	0	0	0	0	0	0	0	0	0
	0	0	0	0	0	0	0	0	0	0	0	0
	0.1	0.1	0.1	0	0	0	0	0	0	0	0	0
	0	0	0	0	0	0	0	0	0	0	0	0
	0	0	0	0	0	0	0	0	0	0	0	0
	0	0	0	0.7	0.5	0	0	0	0	0	0	0
	0	0	0	0	0	0	0	0	0	0	0	0
	0	0	0	0	0	0	0	0	0	0	0	0
	0	0	0	0	0	0	0	0	0	0	0	0
	0	0	0	0	0	0	0	0	0	0	0	0
	0	0	0	0	0	0	0	0	0	0	0	0
	0	0	0	0	0	0	0	0	0	0	0	0
	0	0	0	0.1	0.1	0.1	0	0	0	0	0	0
	0	0	0	0	0	0	0	0	0	0	0	0
	0	0	0	0	0	0	0	0	0	0	0	0
	0	0	0	0	0	0	0	0	0	0	0	0
	0	0	0	0	0	0	0	0	0	0	0	0
	0	0	0	0	0	0	0	0	0	0	0	0
	0	0	0	0	0	0	0	0	0	0	0	0
	0	0	0	0.1	0.1	0.1	0	0	0	0	0	0
	0	0	0	0	0	0	0.1	0.1	0.1	0	0	0
	0	0	0	0	0	0	0	0	0	0	0	0
	0	0	0	0	0	0	0	0	0	0	0	0
	0	0	0	0	0	0	0	0	0	0	0	0
	0	0	0	0	0	0	0	0	0	0	0	0
	0	0	0	0	0	0	0	0	0	0	0	0
	0	0	0	0	0	0	0	0	0	0	0	0
	0.1	0.1	0.1	0	0	0	0	0	0	0	0	0
	0.1	0.1	0.1	0.1	0.1	0.1	0.1	0.1	0.1	0	0	0
	0	0	0	0	0	0	0	0	0	0	0	0
	0	0	0	0	0	0	0	0	0	0	0	0
	0	0	0	0	0	0	0	0	0	0	0	0
	0	0	0	0	0	0	0	0	0	0	0	0
	0	0	0	0	0	0	0	0	0	0	0	0
	0.1	0.1	0.1	0	0	0	0	0	0	0	0	0
	0	0	0	0	0	0	0	0	0	0	0	0
	0	0	0	0	0	0	0	0	0	0	0	0
	0	0	0	0	0	0	0	0	0	0	0	0
	0	0	0	0	0	0	0	0	0	0.1	0.1	0.1
	0	0	0	0	0	0	0	0	0	0	0	0
	0	0	0	0	0	0	0	0	0	0	0	0
	0	0	0	0	0	0	0	0	0	0	0	0
	0	0	0	0	0	0	0	0	0	0	0	0
	0	0	0	0.1	0.1	0.1	0	0	0	0	0	0
	0	0	0	0	0	0	0	0	0	0	0	0
	0	0	0	0	0	0	0	0	0	0	0	0
	0	0	0	0	0	0	0	0	0	0	0	0
	0	0	0	0	0	0	0	0	0	0	0	0
	0	0	0	0.1	0.1	0.1	0	0	0	0	0	0
	0	0	0	0	0	0	0	0	0	0	0	0
	0	0	0	0	0	0	0	0	0	0	0	0
	0.4	0.3	0	0	0	0	0	0	0	0	0	0
	0	0	0	0	0	0	0.1	0.1	0.1	0	0	0
	0	0	0	0	0	0	0	0	0	0	0	0
	0.1	0.1	0.1	0	0	0	0.1	0.1	0	0	0	0
	0	0	0	0	0	0	0	0	0	0	0	0
	0	0	0	0	0	0	0	0	0	0	0	0
	0.1	0.1	0.1	0	0	0	0	0	0	0.1	0.1	0.1
	0	0	0	0	0	0	0	0	0	0	0	0
	0.1	0.1	0.1	0.1	0.1	0.1	0	0	0	0	0	0
	0	0	0	0	0	0	0	0	0	0	0	0
	0	0	0	0	0	0	0	0	0	0	0	0
	0	0	0	0.1	0.1	0.1	0	0	0	0.1	0.1	0.1
	0.1	0.1	0.1	0	0	0	0	0	0	0	0	0
	0	0	0	0.1	0.1	0.1	0	0	0	0	0	0
	0.1	0.1	0.1	0	0	0	0.1	0.1	0.1	0	0	0
	0.2	0.2	0.1	0	0	0	0	0	0	0.1	0.1	0.1
	0	0	0	0	0	0	0.1	0.1	0.1	0	0	0
	0.1	0.1	0.1	0.1	0.1	0.1	0	0	0	0	0	0
	0	0	0	0.1	0.1	0.1	0	0	0	0	0	0
	0	0	0	0.1	0.1	0.1	0	0	0	0.1	0.1	0.1
	0	0	0	0	0	0	0	0	0	0	0	0
	0	0	0	0	0	0	0	0	0	0.1	0.1	0.1
	0	0	0	0.7	0.6	0.1	0	0	0	0	0	0
	0	0	0	0.1	0.1	0.1	0	0	0	0	0	0
	0	0	0	0	0	0	0.1	0.1	0.1	0	0	0
	0	0	0	0.1	0.1	0.1	0	0	0	0	0	0
	0	0	0	0.1	0.1	0.1	0	0	0	0	0	0
	0	0	0	0	0	0	0	0	0	0	0	0
	0	0	0	0	0	0	0	0	0	0	0	0
	0	0	0	0	0	0	0	0	0	0	0	0
	0.1	0.1	0.1	0	0	0	0	0	0	0	0	0
	0	0	0	0	0	0	0	0	0	0.1	0.1	0.1
	0	0	0	0.1	0.1	0.1	0	0	0	0	0	0
	0	0	0	0	0	0	0	0	0	0	0	0
	0	0	0	0.1	0.1	0.1	0	0	0	0	0	0
	0.1	0.1	0.1	0.1	0.1	0.1	0	0	0	0	0	0
	0	0	0	0	0	0	0	0	0	0	0	0
	0.1	0.1	0.1	0	0	0	0	0	0	0.1	0.1	0.1
	0	0	0	0	0	0	0	0	0	0	0	0
	0	0	0	0.1	0.1	0.1	0	0	0	0	0	0
	0	0	0	0	0	0	0.1	0.1	0.1	0.1	0.1	0.1
	0	0	0	0	0	0	0	0	0	0	0	0
	0	0	0	0	0	0	0.1	0.1	0.1	0	0	0
	0	0	0	0	0	0	0	0	0	0	0	0
	0	0	0	0.1	0.1	0.1	0	0	0	0	0	0
	0	0	0	0	0	0	0	0	0	0	0	0
	0	0	0	0	0	0	0	0	0	0	0	0
	0	0	0	0	0	0	0	0	0	0	0	0
	0	0	0	0	0	0	0	0	0	0	0	0
	0	0	0	0.1	0.1	0.1	0	0	0	0	0	0
	0	0	0	0	0	0	0.1	0.1	0.1	0	0	0
	0	0	0	0	0	0	0	0	0	0	0	0
	0	0	0	0.1	0.1	0.1	0	0	0	0	0	0
	0	0	0	0	0	0	0	0	0	0	0	0
	0	0	0	0	0	0	0	0	0	0.1	0.1	0.1
	0.1	0.1	0.1	0.1	0.1	0.1	0	0	0	0	0	0
	0	0	0	0	0	0	0	0	0	0	0	0
	0.1	0.1	0.1	0.1	0.1	0.1	0	0	0	0	0	0
	0	0	0	0	0	0	0	0	0	0	0	0
	0	0	0	0.1	0.1	0.1	0	0	0	0.1	0.1	0.1
	0	0	0	0.1	0.1	0.1	0	0	0	0	0	0
	0	0	0	0	0	0	0	0	0	0	0	0
	0	0	0	0	0	0	0	0	0	0	0	0
	0	0	0	0.1	0.1	0.1	0	0	0	0	0	0
	0	0	0	0	0	0	0	0	0	0	0	0
	0	0	0	0	0	0	0.2	0.2	0.1	0	0	0
	0	0	0	0	0	0	0.1	0.1	0.1	0	0	0
	0	0	0	0.1	0.1	0.1	0	0	0	0	0	0
	0	0	0	0	0	0	0.1	0.1	0	0	0	0
	0	0	0	0	0	0	0.1	0.1	0.1	0	0	0
	0	0	0	0	0	0	0	0	0	0	0	0
	0	0	0	0	0	0	0.1	0.1	0.1	0	0	0
	0	0	0	0.1	0.1	0.1	0	0	0	0	0	0
	0	0	0	0.1	0.1	0.1	0	0	0	0	0	0
	0.1	0.1	0.1	0	0	0	0	0	0	0	0	0
	0.1	0.1	0.1	0.1	0.1	0.1	0	0	0	0	0	0
	0	0	0	0	0	0	0	0	0	0	0	0
	0.1	0.1	0.1	0.1	0.1	0.1	0	0	0	0	0	0
	0	0	0	0	0	0	0	0	0	0	0	0
	0	0	0	0.1	0.1	0.1	0	0	0	0	0	0
	0	0	0	0	0	0	0	0	0	0	0	0
	0	0	0	0	0	0	0	0	0	0	0	0
	0	0	0	0.1	0.1	0.1	0	0	0	0	0	0
	0.1	0.1	0.1	0	0	0	0	0	0	0	0	0
	0	0	0	0	0	0	0.1	0.1	0	0	0	0
	0	0	0	0.1	0.1	0.1	0	0	0	0	0	0
	0	0	0	0.1	0.1	0.1	0	0	0	0	0	0
	0.4	0.4	0.1	0	0	0	0	0	0	0	0	0
	0	0	0	0.1	0.1	0.1	0.1	0.1	0.1	0	0	0
	0	0	0	0	0	0	0.1	0.1	0.1	0	0	0
	0	0	0	0.1	0.1	0.1	0	0	0	0	0	0
	0	0	0	0.1	0.1	0.1	0	0	0	0	0	0
	0	0	0	0	0	0	0	0	0	0	0	0
	0.1	0.1	0.1	0.1	0.1	0.1	0	0	0	0	0	0
	0.1	0.1	0.1	0.1	0.1	0.1	0	0	0	0	0	0
	0	0	0	0	0	0	0	0	0	0	0	0
	0	0	0	0.1	0.1	0.1	0	0	0	0	0	0
	0	0	0	0	0	0	0	0	0	0	0	0
	0	0	0	0.1	0.1	0.1	0	0	0	0	0	0
	0	0	0	0.1	0.1	0.1	0	0	0	0	0	0
	0	0	0	0.1	0.1	0.1	0.1	0.1	0.1	0	0	0
	0	0	0	0.1	0.1	0.1	0	0	0	0	0	0
	0.1	0.1	0.1	0	0	0	0	0	0	0	0	0
	0	0	0	0.1	0.1	0.1	0	0	0	0	0	0
	0	0	0	0	0	0	0	0	0	0	0	0
	0	0	0	0.1	0.1	0.1	0	0	0	0	0	0
	0	0	0	0.1	0.1	0.1	0.1	0.1	0.1	0	0	0
	0	0	0	0.1	0.1	0.1	0	0	0	0	0	0
	0	0	0	0.1	0.1	0.1	0	0	0	0	0	0
	0	0	0	0.1	0.1	0.1	0	0	0	0	0	0
	0	0	0	0.1	0.1	0.1	0.4	0.3	0	0	0	0
	0.1	0.1	0.1	0	0	0	0	0	0	0	0	0
	0.1	0.1	0.1	0.1	0.1	0.1	0	0	0	0	0	0
	0.1	0.1	0.1	0.1	0.1	0.1	0	0	0	0	0	0
	0	0	0	0	0	0	0	0	0	0	0	0
	0.2	0.2	0.1	0.1	0.1	0.1	0	0	0	0	0	0
	0	0	0	0.1	0.1	0.1	0	0	0	0	0	0
	0	0	0	0	0	0	0	0	0	0	0	0
	0	0	0	0	0	0	0	0	0	0	0	0
	0	0	0	0.7	0.6	0.1	0	0	0	0	0	0
	0.1	0.1	0.1	0.1	0.1	0.1	0	0	0	0	0	0
	0	0	0	0	0	0	0	0	0	0	0	0
	0	0	0	0	0	0	0	0	0	0	0	0
	0	0	0	0.1	0.1	0.1	0	0	0	0	0	0
	0	0	0	0.1	0.1	0.1	0	0	0	0	0	0
	0	0	0	0	0	0	0	0	0	0	0	0
	0	0	0	0	0	0	0	0	0	0	0	0
	0.1	0.1	0.1	0.1	0.1	0.1	0	0	0	0	0	0
	0	0	0	0.1	0.1	0.1	0	0	0	0	0	0
	0	0	0	0.1	0.1	0.1	0	0	0	0	0	0
	0.1	0.1	0.1	0	0	0	0	0	0	0.1	0.1	0.1
	0	0	0	0.1	0.1	0.1	0.1	0.1	0.1	0	0	0
	0	0	0	0.1	0.1	0.1	0	0	0	0	0	0
	0	0	0	0.1	0.1	0.1	0	0	0	0	0	0
	0	0	0	0	0	0	0	0	0	0	0	0
	0	0	0	0.1	0.1	0.1	0.1	0.1	0.1	0	0	0
	0	0	0	0	0	0	0	0	0	0	0	0
	0	0	0	0	0	0	0	0	0	0	0	0
	0	0	0	0.1	0.1	0.1	0	0	0	0	0	0
	0	0	0	0	0	0	0	0	0	0	0	0
	0.1	0.1	0.1	0.1	0.1	0.1	0.1	0.1	0.1	0	0	0
	0.1	0.1	0.1	0.1	0.1	0.1	0	0	0	0	0	0
	0	0	0	0.2	0.2	0.1	0.1	0.1	0.1	0	0	0
	0	0	0	0.1	0.1	0.1	0	0	0	0.1	0.1	0.1
	0	0	0	0.1	0.1	0.1	0	0	0	0	0	0
	0.1	0.1	0.1	0	0	0	0	0	0	0.1	0.1	0.1
	0	0	0	0.1	0.1	0.1	0	0	0	0	0	0
	0	0	0	0.1	0.1	0.1	0.1	0.1	0.1	0	0	0
	0.1	0.1	0.1	0	0	0	0	0	0	0	0	0
	0	0	0	0.1	0.1	0.1	0	0	0	0	0	0
	0	0	0	0.1	0.1	0.1	0	0	0	0	0	0
	0	0	0	0.1	0.1	0.1	0	0	0	0	0	0
	0	0	0	0	0	0	0.1	0.1	0.1	0	0	0
	0.1	0.1	0.1	0	0	0	0	0	0	0	0	0
	0	0	0	0	0	0	0	0	0	0	0	0
	0.1	0.1	0.1	0.1	0.1	0.1	0.1	0.1	0.1	0	0	0
	0	0	0	0.1	0.1	0.1	0	0	0	0	0	0
	0	0	0	0.1	0.1	0.1	0	0	0	0	0	0
	0	0	0	0	0	0	0	0	0	0	0	0
	0	0	0	0.1	0.1	0.1	0	0	0	0.1	0.1	0.1
	0.1	0.1	0.1	0	0	0	0	0	0	0	0	0
	0	0	0	0	0	0	0.1	0.1	0.1	0	0	0
	0	0	0	0.1	0.1	0.1	0.1	0.1	0.1	0	0	0
	0	0	0	0.1	0.1	0.1	0	0	0	0	0	0
	0	0	0	0.1	0.1	0.1	0	0	0	0	0	0
	0	0	0	0	0	0	0	0	0	0.1	0.1	0.1
	0	0	0	0	0	0	0.1	0.1	0.1	0	0	0
	0	0	0	0.1	0.1	0.1	0	0	0	0	0	0
	0.1	0.1	0.1	0.1	0.1	0.1	0	0	0	0	0	0
	0	0	0	0	0	0	0	0	0	0.1	0.1	0.1
	0	0	0	0.1	0.1	0.1	0	0	0	0	0	0
	0	0	0	0	0	0	0	0	0	0	0	0
	0	0	0	0	0	0	0.1	0.1	0.1	0.1	0.1	0.1
	0	0	0	0.1	0.1	0.1	0	0	0	0	0	0
	0	0	0	0.1	0.1	0.1	0	0	0	0	0	0
	0.1	0.1	0.1	0.1	0.1	0.1	0.1	0.1	0.1	0	0	0
	0	0	0	0.1	0.1	0.1	0	0	0	0	0	0
	0	0	0	0.1	0.1	0.1	0	0	0	0	0	0
	0	0	0	0.1	0.1	0.1	0	0	0	0	0	0
	0	0	0	0	0	0	0	0	0	0.1	0.1	0.1
	0	0	0	0.1	0.1	0.1	0	0	0	0.1	0.1	0.1
	0	0	0	0	0	0	0	0	0	0	0	0
	0	0	0	0	0	0	0	0	0	0.1	0.1	0.1
	0.1	0.1	0.1	0.1	0.1	0.1	0	0	0	0.1	0.1	0.1
	0	0	0	0	0	0	0.1	0.1	0.1	0	0	0
	0.1	0.1	0.1	0.1	0.1	0.1	0.1	0.1	0.1	0	0	0
	0	0	0	0.1	0.1	0.1	0	0	0	0.1	0.1	0.1
	0	0	0	0.1	0.1	0.1	0	0	0	0	0	0
	0	0	0	0.1	0.1	0.1	0	0	0	0	0	0
	0	0	0	0.1	0.1	0.1	0	0	0	0	0	0
	0	0	0	0	0	0	0	0	0	0	0	0
	0.1	0.1	0.1	0.1	0.1	0.1	0	0	0	0.1	0.1	0.1
	0.1	0.1	0.1	0.1	0.1	0.1	0	0	0	0	0	0
	0	0	0	0.1	0.1	0.1	0	0	0	0.1	0.1	0.1
	0	0	0	0	0	0	0	0	0	0.1	0.1	0.1
	0	0	0	0.1	0.1	0.1	0.1	0.1	0.1	0	0	0
	0.1	0.1	0.1	0.1	0.1	0.1	0.1	0.1	0.1	0	0	0
	0	0	0	0.1	0.1	0.1	0	0	0	0.1	0.1	0.1
	0	0	0	0	0	0	0	0	0	0.1	0.1	0.1
	0	0	0	0.1	0.1	0.1	0	0	0	0	0	0
	0	0	0	0.1	0.1	0.1	0	0	0	0.1	0.1	0.1
	0	0	0	0	0	0	0	0	0	0	0	0
	0	0	0	0.1	0.1	0.1	0	0	0	0.1	0.1	0.1
	0	0	0	0.1	0.1	0.1	0	0	0	0	0	0
	0	0	0	0.1	0.1	0.1	0	0	0	0	0	0
	0.1	0.1	0.1	0.1	0.1	0.1	0	0	0	0	0	0
	0	0	0	0	0	0	0	0	0	0	0	0
	0.1	0.1	0	0.1	0.1	0.1	0	0	0	0	0	0
	0	0	0	0	0	0	0	0	0	0	0	0
	0.1	0.1	0.1	0.1	0.1	0.1	0	0	0	0	0	0
	0	0	0	0	0	0	0	0	0	0	0	0
	0.1	0.1	0.1	0.1	0.1	0.1	0	0	0	0	0	0
	0.1	0.1	0.1	0.1	0.1	0.1	0	0	0	0	0	0
	0	0	0	0.1	0.1	0.1	0	0	0	0.1	0.1	0.1
	0	0	0	0	0	0	0	0	0	0.4	0.3	0
	0.1	0.1	0.1	0.1	0.1	0.1	0	0	0	0	0	0
	0	0	0	0	0	0	0	0	0	0	0	0
	0	0	0	0.1	0.1	0.1	0	0	0	0	0	0
	0	0	0	0.1	0.1	0.1	0.1	0.1	0.1	0	0	0
	0	0	0	0.1	0.1	0.1	0	0	0	0	0	0
	0	0	0	0.1	0.1	0.1	0	0	0	0	0	0
	0	0	0	0	0	0	0	0	0	0	0	0
	0.1	0.1	0.1	0.1	0.1	0.1	0	0	0	0.9	0.6	0
	0	0	0	0.1	0.1	0.1	0	0	0	0	0	0
	0.1	0.1	0.1	0.1	0.1	0.1	0	0	0	0	0	0
	0	0	0	0.1	0.1	0.1	0	0	0	0.1	0.1	0.1
	0	0	0	0.1	0.1	0.1	0	0	0	0.1	0.1	0.1
	0	0	0	0	0	0	0	0	0	0	0	0
	0	0	0	0.1	0.1	0.1	0	0	0	0	0	0
	0	0	0	0.1	0.1	0.1	0	0	0	0	0	0
	0.1	0.1	0.1	0.1	0.1	0.1	0	0	0	0	0	0
	0.1	0.1	0.1	0	0	0	0	0	0	0.2	0.2	0.1
	0.1	0.1	0.1	0.1	0.1	0.1	0	0	0	0.1	0.1	0.1
	0	0	0	0.1	0.1	0.1	0.1	0.1	0.1	0	0	0
	0.1	0.1	0.1	0.1	0.1	0.1	0	0	0	0	0	0
	0	0	0	0.1	0.1	0.1	0	0	0	0	0	0
	0	0	0	0.1	0.1	0.1	0	0	0	0.1	0.1	0.1
	0.1	0.1	0.1	0	0	0	0	0	0	0	0	0
	0.1	0.1	0.1	0	0	0	0	0	0	0	0	0
	0.1	0.1	0.1	0	0	0	0	0	0	0	0	0
	0.1	0.1	0.1	0	0	0	0	0	0	0	0	0
	0	0	0	0.1	0.1	0.1	0	0	0	0	0	0
	0	0	0	0.1	0.1	0.1	0	0	0	0	0	0
	0	0	0	0.1	0.1	0.1	0	0	0	0	0	0
	0	0	0	0.1	0.1	0.1	0.1	0.1	0.1	0	0	0
	0.1	0.1	0.1	0.1	0.1	0.1	0.1	0.1	0	0	0	0
	0	0	0	0	0	0	0	0	0	0	0	0
	0	0	0	0	0	0	0	0	0	0	0	0
	0.1	0.1	0.1	0.1	0.1	0.1	0	0	0	0.1	0.1	0.1
	0	0	0	0	0	0	0	0	0	0.1	0.1	0.1
	0.1	0.1	0.1	0	0	0	0	0	0	0.1	0.1	0.1
	0	0	0	0.1	0.1	0.1	0	0	0	0	0	0
	0.1	0.1	0.1	0.1	0.1	0.1	0	0	0	0	0	0
	0.1	0.1	0.1	0	0	0	0	0	0	0	0	0
	0.1	0.1	0.1	0.1	0.1	0.1	0	0	0	0	0	0
	0.1	0.1	0.1	0.1	0.1	0.1	0	0	0	0	0	0
	0.1	0.1	0.1	0.1	0.1	0.1	0	0	0	0	0	0
	0	0	0	0.1	0.1	0.1	0	0	0	0	0	0
	0.1	0.1	0.1	0.1	0.1	0.1	0	0	0	0	0	0
	0	0	0	0	0	0	0.1	0.1	0.1	0	0	0
	0.1	0.1	0.1	0.1	0.1	0.1	0.1	0.1	0.1	0	0	0
	0.1	0.1	0.1	0.1	0.1	0.1	0.1	0.1	0.1	0	0	0
	0.1	0.1	0.1	0.1	0.1	0.1	0.1	0.1	0.1	0	0	0
	0	0	0	0.1	0.1	0.1	0	0	0	0	0	0
	0.1	0.1	0.1	0	0	0	0	0	0	0	0	0
	0.1	0.1	0.1	0.1	0.1	0.1	0.4	0.3	0.1	0.1	0.1	0
	0.1	0.1	0.1	0.1	0.1	0.1	0	0	0	0	0	0
	0.1	0.1	0.1	0.1	0.1	0.1	0	0	0	0	0	0
	0	0	0	0.1	0.1	0.1	0	0	0	0	0	0
	0.1	0.1	0.1	0	0	0	0	0	0	0	0	0
	0.1	0.1	0.1	0.1	0.1	0.1	0.1	0.1	0.1	0.1	0.1	0.1
	0	0	0	0.1	0.1	0.1	0	0	0	0	0	0
	0.1	0.1	0.1	0	0	0	0	0	0	0	0	0
	0	0	0	0	0	0	0	0	0	0.1	0.1	0.1
	0.1	0.1	0.1	0	0	0	0	0	0	0.1	0.1	0.1
	0	0	0	0	0	0	0	0	0	0	0	0
	0	0	0	0.1	0.1	0.1	0	0	0	0	0	0
	0	0	0	0	0	0	0	0	0	0	0	0
	0	0	0	0.1	0.1	0.1	0.1	0.1	0.1	0.1	0.1	0.1
	0	0	0	0	0	0	0.1	0.1	0.1	0	0	0
	0	0	0	0.1	0.1	0.1	0.1	0.1	0.1	0.1	0.1	0.1
	0.1	0.1	0.1	0.1	0.1	0.1	0	0	0	0	0	0
	0	0	0	0.1	0.1	0.1	0	0	0	0	0	0
	0	0	0	0.1	0.1	0.1	0	0	0	0.1	0.1	0.1
	0	0	0	0	0	0	0	0	0	0	0	0
	0	0	0	0.1	0.1	0.1	0	0	0	0.1	0.1	0.1
	0	0	0	0.1	0.1	0.1	0	0	0	0	0	0
	0.1	0.1	0.1	0.1	0.1	0.1	0	0	0	0	0	0
	0.1	0.1	0.1	0.1	0.1	0.1	0	0	0	0	0	0
	0.1	0.1	0.1	0.1	0.1	0.1	0	0	0	0	0	0
	0	0	0	0.1	0.1	0.1	0	0	0	0	0	0
	0.1	0.1	0.1	0.1	0.1	0.1	0	0	0	0	0	0
	0.1	0.1	0.1	0.1	0.1	0.1	0	0	0	0	0	0
	0.1	0.1	0.1	0	0	0	0	0	0	0	0	0
	0.1	0.1	0.1	0.1	0.1	0.1	0.1	0.1	0.1	0	0	0
	0	0	0	0.1	0.1	0.1	0	0	0	0	0	0
	0.1	0.1	0.1	0.1	0.1	0.1	0	0	0	0	0	0
	0	0	0	0	0	0	0	0	0	0	0	0
	0.1	0.1	0.1	0.1	0.1	0.1	0	0	0	0	0	0
	0.1	0.1	0.1	0.1	0.1	0.1	0	0	0	0.1	0.1	0.1
	0	0	0	0.1	0.1	0.1	0.1	0.1	0.1	0.1	0.1	0.1
	0	0	0	0.1	0.1	0.1	0	0	0	0	0	0
	0	0	0	0.1	0.1	0.1	0	0	0	0.1	0.1	0.1
	0	0	0	0.1	0.1	0.1	0	0	0	0	0	0
	0	0	0	0	0	0	0	0	0	0	0	0
	0	0	0	0.1	0.1	0.1	0	0	0	0	0	0
	0	0	0	0.1	0.1	0.1	0	0	0	0	0	0
	0.1	0.1	0.1	0.1	0.1	0.1	0	0	0	0	0	0
	0	0	0	0.1	0.1	0.1	0	0	0	0	0	0
	0	0	0	0	0	0	0	0	0	0	0	0
	0.1	0.1	0.1	0.1	0.1	0.1	0	0	0	0	0	0
	0	0	0	0.1	0.1	0.1	0	0	0	0	0	0
	0	0	0	0.1	0.1	0.1	0	0	0	0.1	0.1	0.1
	0	0	0	0.1	0.1	0.1	0	0	0	0	0	0
	0.1	0.1	0.1	0.1	0.1	0.1	0.1	0.1	0.1	0	0	0
	0	0	0	0.1	0.1	0.1	0	0	0	0	0	0
	0.1	0.1	0.1	0.1	0.1	0.1	0	0	0	0	0	0
	0.1	0.1	0.1	0.1	0.1	0.1	0.1	0.1	0.1	0	0	0
	0	0	0	0.1	0.1	0.1	0	0	0	0	0	0
	0	0	0	0.1	0.1	0.1	0	0	0	0.1	0.1	0.1
	0	0	0	0.1	0.1	0.1	0.1	0.1	0.1	0	0	0
	0	0	0	0.1	0.1	0.1	0	0	0	0	0	0
	0.1	0.1	0.1	0.1	0.1	0.1	0	0	0	0	0	0
	0.1	0.1	0.1	0	0	0	0	0	0	0	0	0
	0.1	0.1	0.1	0.1	0.1	0.1	0	0	0	0	0	0
	0	0	0	0.1	0.1	0.1	0	0	0	0.1	0.1	0.1
	0.1	0.1	0.1	0.1	0.1	0.1	0	0	0	0.1	0.1	0.1
	0.1	0.1	0.1	0.1	0.1	0.1	0	0	0	0	0	0
	0	0	0	0	0	0	0	0	0	0.1	0.1	0.1
	0.1	0.1	0.1	0.1	0.1	0.1	0	0	0	0.1	0.1	0.1
	0	0	0	0.1	0.1	0.1	0	0	0	0	0	0
	0	0	0	0	0	0	0	0	0	0	0	0
	0	0	0	0.1	0.1	0.1	0	0	0	0	0	0
	0.1	0.1	0.1	0.1	0.1	0.1	0	0	0	0	0	0
	0	0	0	0.1	0.1	0.1	0	0	0	0	0	0
	0	0	0	0.1	0.1	0.1	0	0	0	0	0	0
	0.1	0.1	0.1	0.1	0.1	0.1	0	0	0	0	0	0
	0	0	0	0.1	0.1	0.1	0	0	0	0.1	0.1	0.1
	0.1	0.1	0.1	0	0	0	0	0	0	0	0	0
	0	0	0	0	0	0	0	0	0	0	0	0
	0	0	0	0.1	0.1	0.1	0	0	0	0	0	0
	0	0	0	0.1	0.1	0.1	0	0	0	0	0	0
	0.1	0.1	0.1	0.1	0.1	0.1	0	0	0	0	0	0
	0	0	0	0.1	0.1	0.1	0.1	0.1	0.1	0	0	0
	0.1	0.1	0.1	0.1	0.1	0.1	0	0	0	0	0	0
	0.2	0.2	0.1	0.1	0.1	0.1	0	0	0	0	0	0
	0	0	0	0.1	0.1	0.1	0.1	0.1	0.1	0	0	0
	0.1	0.1	0.1	0.1	0.1	0.1	0	0	0	0	0	0
	0.1	0.1	0.1	0.1	0.1	0.1	0	0	0	0	0	0
	0	0	0	0.1	0.1	0.1	0	0	0	0.1	0.1	0.1
	0.1	0.1	0.1	0.1	0.1	0.1	0	0	0	0	0	0
	0.1	0.1	0.1	0.1	0.1	0.1	0	0	0	0	0	0
	0.1	0.1	0.1	0.1	0.1	0.1	0	0	0	0	0	0
	0	0	0	0.1	0.1	0.1	0	0	0	0	0	0
	0.1	0.1	0.1	0.1	0.1	0.1	0	0	0	0	0	0
	0.1	0.1	0.1	0.1	0.1	0.1	0	0	0	0	0	0
	0	0	0	0	0	0	0	0	0	0	0	0
	0	0	0	0.1	0.1	0.1	0	0	0	0	0	0
	0.1	0.1	0.1	0.1	0.1	0.1	0	0	0	0	0	0
	0	0	0	0.1	0.1	0.1	0	0	0	0	0	0
	0.1	0.1	0.1	0.1	0.1	0.1	0	0	0	0	0	0
	0.1	0.1	0.1	0.1	0.1	0.1	0	0	0	0	0	0
	0.1	0.1	0.1	0.1	0.1	0.1	0	0	0	0	0	0
	0.1	0.1	0.1	0.1	0.1	0.1	0	0	0	0	0	0
	0	0	0	0.2	0.2	0.2	0	0	0	0	0	0
	0.1	0.1	0.1	0.1	0.1	0.1	0	0	0	0	0	0
	0	0	0	0.1	0.1	0.1	0	0	0	0	0	0
	0.1	0.1	0.1	0	0	0	0	0	0	0	0	0
	0	0	0	0.1	0.1	0.1	0	0	0	0	0	0
	0	0	0	0.1	0.1	0.1	0	0	0	0	0	0
	0.1	0.1	0.1	0	0	0	0	0	0	0	0	0
	0	0	0	0.1	0.1	0.1	0	0	0	0	0	0
	0.1	0.1	0.1	0.1	0.1	0.1	0	0	0	0	0	0
	0	0	0	0.1	0.1	0.1	0.1	0.1	0.1	0	0	0
	0.1	0.1	0.1	0.1	0.1	0.1	0	0	0	0	0	0
	0.1	0.1	0.1	0.1	0.1	0.1	0	0	0	0	0	0
	0	0	0	0.1	0.1	0.1	0.1	0.1	0.1	0	0	0
	0	0	0	0.1	0.1	0.1	0	0	0	0	0	0
	0.1	0.1	0.1	0.1	0.1	0.1	0	0	0	0	0	0
	0.1	0.1	0.1	0.1	0.1	0.1	0	0	0	0.1	0.1	0.1
	0	0	0	0.1	0.1	0.1	0	0	0	0	0	0
	0.1	0.1	0.1	0.1	0.1	0.1	0	0	0	0	0	0
	0	0	0	0.1	0.1	0.1	0.1	0.1	0.1	0.1	0.1	0.1
	0	0	0	0	0	0	0	0	0	0	0	0
	0	0	0	0	0	0	0	0	0	0	0	0
	0	0	0	0.1	0.1	0.1	0	0	0	0	0	0
	0	0	0	0.1	0.1	0.1	0	0	0	0	0	0
	0.1	0.1	0.1	0.1	0.1	0.1	0	0	0	0	0	0
	0	0	0	0.1	0.1	0.1	0	0	0	0	0	0
	0	0	0	0.1	0.1	0.1	0	0	0	0	0	0
	0	0	0	0	0	0	0	0	0	0	0	0
	0	0	0	0.1	0.1	0.1	0	0	0	0.1	0.1	0.1
	0	0	0	0.1	0.1	0.1	0.1	0.1	0.1	0	0	0
	0	0	0	0.1	0.1	0.1	0.1	0.1	0.1	0.1	0.1	0.1
	0	0	0	0	0	0	0	0	0	0	0	0
	0.1	0.1	0.1	0.1	0.1	0.1	0	0	0	0.1	0.1	0.1
	0	0	0	0.1	0.1	0.1	0.1	0.1	0.1	0.1	0.1	0.1
	0.1	0.1	0.1	0.1	0.1	0.1	0	0	0	0	0	0
	0.1	0.1	0.1	0.1	0.1	0.1	0.1	0.1	0.1	0.1	0.1	0.1
	0.1	0.1	0.1	0.1	0.1	0.1	0	0	0	0	0	0
	0	0	0	0.1	0.1	0.1	0	0	0	0	0	0
	0.1	0.1	0.1	0.1	0.1	0.1	0	0	0	0	0	0
	0	0	0	0.1	0.1	0.1	0	0	0	0	0	0
	0	0	0	0.1	0.1	0.1	0	0	0	0	0	0
	0.1	0.1	0.1	0	0	0	0	0	0	0	0	0
	0	0	0	0	0	0	0	0	0	0	0	0
	0.1	0.1	0.1	0.1	0.1	0.1	0	0	0	0.1	0.1	0.1
	0.1	0.1	0.1	0.1	0.1	0.1	0	0	0	0	0	0
	0.2	0.2	0.1	0	0	0	0	0	0	0	0	0
	0.1	0.1	0.1	0.1	0.1	0.1	0	0	0	0	0	0
	0	0	0	0.1	0.1	0.1	0	0	0	0.1	0.1	0.1
	0.1	0.1	0.1	0.1	0.1	0.1	0	0	0	0	0	0
	0.1	0.1	0.1	0.1	0.1	0.1	0.1	0.1	0.1	0	0	0
	0	0	0	0.1	0.1	0.1	0.1	0.1	0.1	0	0	0
	0.1	0.1	0.1	0	0	0	0	0	0	0.1	0.1	0.1
	0	0	0	0	0	0	0.1	0.1	0.1	0	0	0
	0	0	0	0.1	0.1	0.1	0	0	0	0	0	0
	0	0	0	0.1	0.1	0.1	0	0	0	0	0	0
	0	0	0	0.1	0.1	0.1	0	0	0	0.1	0.1	0.1
	0.1	0.1	0.1	0.1	0.1	0.1	0.1	0.1	0.1	0.1	0.1	0.1
	0.1	0.1	0.1	0.1	0.1	0.1	0	0	0	0	0	0
	0.1	0.1	0.1	0.1	0.1	0.1	0.1	0.1	0.1	0	0	0
	0	0	0	0.1	0.1	0.1	0	0	0	0	0	0
	0.1	0.1	0.1	0	0	0	0	0	0	0	0	0
	0	0	0	0.1	0.1	0.1	0	0	0	0	0	0
	0	0	0	0.1	0.1	0.1	0	0	0	0	0	0
	0.1	0.1	0.1	0.1	0.1	0.1	0	0	0	0	0	0
	0	0	0	0.1	0.1	0.1	0.1	0.1	0.1	0	0	0
	0	0	0	0.1	0.1	0.1	0	0	0	0	0	0
	0	0	0	0.1	0.1	0.1	0	0	0	0.1	0.1	0.1
	0	0	0	0.1	0.1	0.1	0	0	0	0	0	0
	0.1	0.1	0.1	0.1	0.1	0.1	0	0	0	0.1	0.1	0.1
	0	0	0	0.1	0.1	0.1	0	0	0	0	0	0
	0.1	0.1	0.1	0.1	0.1	0.1	0	0	0	0	0	0
	0.1	0.1	0.1	0.1	0.1	0.1	0.1	0.1	0.1	0.1	0.1	0.1
	0	0	0	0.1	0.1	0.1	0	0	0	0	0	0
	0	0	0	0.1	0.1	0.1	0	0	0	0.1	0.1	0.1
	0.1	0.1	0.1	0.1	0.1	0.1	0.1	0.1	0.1	0	0	0
	0.1	0.1	0.1	0.1	0.1	0.1	0.1	0.1	0.1	0.2	0.2	0.1
	0.1	0.1	0.1	0.1	0.1	0.1	0.1	0.1	0.1	0	0	0
	0	0	0	0.1	0.1	0.1	0	0	0	0	0	0
	0	0	0	0.2	0.2	0.1	0	0	0	0	0	0
	0.1	0.1	0.1	0.1	0.1	0.1	0	0	0	0	0	0
	0	0	0	0.1	0.1	0.1	0	0	0	0	0	0
	0.1	0.1	0.1	0.1	0.1	0.1	0.1	0.1	0.1	0	0	0
	0.1	0.1	0.1	0	0	0	0	0	0	0.1	0.1	0.1
	0	0	0	0.1	0.1	0.1	0	0	0	0	0	0
	0.1	0.1	0.1	0.1	0.1	0.1	0	0	0	0.1	0.1	0.1
	0	0	0	0.1	0.1	0.1	0	0	0	0	0	0
	0.1	0.1	0.1	0.1	0.1	0.1	0	0	0	0	0	0
	0.1	0.1	0.1	0.1	0.1	0.1	0	0	0	0	0	0
	0	0	0	0.1	0.1	0.1	0	0	0	0	0	0
	0	0	0	0.1	0.1	0.1	0	0	0	0	0	0
	0	0	0	0.1	0.1	0.1	0.1	0.1	0.1	0	0	0
	0.1	0.1	0.1	0.1	0.1	0.1	0	0	0	0	0	0
	0.1	0.1	0.1	0.1	0.1	0.1	0	0	0	0	0	0
	0	0	0	0.1	0.1	0.1	0	0	0	0	0	0
	0.1	0.1	0.1	0.1	0.1	0.1	0.1	0.1	0.1	0.3	0.3	0.1
	0	0	0	0.1	0.1	0.1	0	0	0	0	0	0
	0.1	0.1	0.1	0.1	0.1	0.1	0.1	0.1	0.1	0	0	0
	0.1	0.1	0.1	0.1	0.1	0.1	0	0	0	0	0	0
	0	0	0	0.1	0.1	0.1	0	0	0	0.1	0.1	0.1
	0.1	0.1	0.1	0.1	0.1	0.1	0	0	0	0	0	0
	0.1	0.1	0.1	0	0	0	0	0	0	0	0	0
	0	0	0	0.1	0.1	0.1	0	0	0	0	0	0
	0	0	0	0.1	0.1	0.1	0	0	0	0	0	0
	0	0	0	0	0	0	0	0	0	0	0	0
	0.1	0.1	0.1	0.1	0.1	0.1	0	0	0	0	0	0
	0.1	0.1	0.1	0	0	0	0	0	0	0	0	0
	0	0	0	0	0	0	0	0	0	0	0	0
	0	0	0	0.1	0.1	0.1	0	0	0	0	0	0
	0.1	0.1	0.1	0.1	0.1	0.1	0	0	0	0	0	0
	0.1	0.1	0.1	0.1	0.1	0.1	0.1	0.1	0.1	0	0	0
	0	0	0	0.1	0.1	0.1	0	0	0	0.1	0.1	0.1
	0	0	0	0.1	0.1	0.1	0	0	0	0	0	0
	0.1	0.1	0.1	0.1	0.1	0.1	0	0	0	0	0	0
	0.1	0.1	0.1	0.1	0.1	0.1	0	0	0	0	0	0
	0	0	0	0.1	0.1	0.1	0	0	0	0	0	0
	0.1	0.1	0.1	0.1	0.1	0.1	0.1	0.1	0.1	0.1	0.1	0.1
	0	0	0	0.1	0.1	0.1	0.1	0.1	0.1	0	0	0
	0.1	0.1	0.1	0.1	0.1	0.1	0	0	0	0	0	0
	0.1	0.1	0.1	0.1	0.1	0.1	0	0	0	0	0	0
	0	0	0	0.1	0.1	0.1	0	0	0	0.1	0.1	0.1
	0.1	0.1	0.1	0.1	0.1	0.1	0	0	0	0	0	0
	0	0	0	0.1	0.1	0.1	0	0	0	0	0	0
	0.1	0.1	0.1	0	0	0	0	0	0	0	0	0
	0	0	0	0.1	0.1	0.1	0	0	0	0	0	0
	0	0	0	0.1	0.1	0.1	0.1	0.1	0.1	0	0	0
	0	0	0	0.1	0.1	0.1	0	0	0	0.1	0.1	0.1
	0.1	0.1	0.1	0.1	0.1	0.1	0	0	0	0.1	0.1	0.1
	0.1	0.1	0.1	0.1	0.1	0.1	0	0	0	0.1	0.1	0.1
	0.1	0.1	0.1	0.1	0.1	0.1	0	0	0	0.1	0.1	0.1
	0	0	0	0.1	0.1	0.1	0	0	0	0	0	0
	0.1	0.1	0.1	0.1	0.1	0.1	0	0	0	0.1	0.1	0.1
	0.1	0.1	0.1	0	0	0	0	0	0	0.1	0.1	0.1
	0.1	0.1	0.1	0.1	0.1	0.1	0	0	0	0	0	0
	0	0	0	0.1	0.1	0.1	0	0	0	0	0	0
	0	0	0	0.1	0.1	0.1	0	0	0	0	0	0
	0.1	0.1	0.1	0.1	0.1	0.1	0	0	0	0	0	0
	0.1	0.1	0.1	0.1	0.1	0.1	0.1	0.1	0.1	0	0	0
	0.1	0.1	0.1	0.1	0.1	0.1	0	0	0	0	0	0
	0	0	0	0.1	0.1	0.1	0	0	0	0	0	0
	0	0	0	0.1	0.1	0.1	0	0	0	0	0	0
	0.1	0.1	0.1	0.1	0.1	0.1	0	0	0	0	0	0
	0	0	0	0.1	0.1	0.1	0.1	0.1	0.1	0	0	0
	0.1	0.1	0.1	0.1	0.1	0.1	0	0	0	0.1	0.1	0.1
	0.1	0.1	0.1	0.1	0.1	0.1	0	0	0	0.1	0.1	0.1
	0.1	0.1	0.1	0.1	0.1	0.1	0	0	0	0.1	0.1	0.1
	0.1	0.1	0.1	0.1	0.1	0.1	0	0	0	0.1	0.1	0.1
	0.1	0.1	0.1	0.1	0.1	0.1	0	0	0	0	0	0
	0	0	0	0.1	0.1	0.1	0	0	0	0	0	0
	0.1	0.1	0.1	0.1	0.1	0.1	0	0	0	0	0	0
	0	0	0	0.1	0.1	0.1	0	0	0	0.1	0.1	0.1
	0	0	0	0.1	0.1	0.1	0	0	0	0	0	0
	0.1	0.1	0.1	0.1	0.1	0.1	0	0	0	0	0	0
	0.1	0.1	0.1	0.1	0.1	0.1	0	0	0	0	0	0
	0	0	0	0.1	0.1	0.1	0	0	0	0.1	0.1	0.1
	0.1	0.1	0.1	0.1	0.1	0.1	0	0	0	0	0	0
	0	0	0	0.1	0.1	0.1	0	0	0	0	0	0
	0	0	0	0.1	0.1	0.1	0	0	0	0	0	0
	0	0	0	0.1	0.1	0.1	0	0	0	0	0	0
	0.1	0.1	0.1	0.1	0.1	0.1	0	0	0	0.1	0.1	0.1
	0.1	0.1	0.1	0.1	0.1	0.1	0	0	0	0.1	0.1	0.1
	0	0	0	0.1	0.1	0.1	0	0	0	0	0	0
	0.1	0.1	0.1	0.1	0.1	0.1	0	0	0	0	0	0
	0.1	0.1	0.1	0.1	0.1	0.1	0	0	0	0	0	0
	0.1	0.1	0.1	0.1	0.1	0.1	0.1	0.1	0.1	0	0	0
	0	0	0	0.1	0.1	0.1	0	0	0	0	0	0
	0	0	0	0.1	0.1	0.1	0.1	0.1	0.1	0	0	0
	0.1	0.1	0.1	0.1	0.1	0.1	0	0	0	0.1	0.1	0.1
	0	0	0	0.1	0.1	0.1	0.1	0.1	0.1	0	0	0
	0	0	0	0.1	0.1	0.1	0.1	0.1	0.1	0	0	0
	0	0	0	0.1	0.1	0.1	0	0	0	0	0	0
	0.1	0.1	0.1	0.1	0.1	0.1	0.1	0.1	0.1	0	0	0
	0.1	0.1	0.1	0.1	0.1	0.1	0	0	0	0	0	0
	0	0	0	0.1	0.1	0.1	0	0	0	0	0	0
	0	0	0	0.1	0.1	0.1	0	0	0	0	0	0
	0.1	0.1	0.1	0.1	0.1	0.1	0	0	0	0.1	0.1	0.1
	0.1	0.1	0.1	0.1	0.1	0.1	0	0	0	0	0	0
	0.1	0.1	0.1	0.1	0.1	0.1	0	0	0	0	0	0
	0.1	0.1	0.1	0	0	0	0	0	0	0	0	0
	0	0	0	0.2	0.2	0.2	0	0	0	0	0	0
	0	0	0	0.1	0.1	0.1	0	0	0	0.1	0.1	0.1
	0.2	0.2	0.1	0.1	0.1	0.1	0	0	0	0.1	0.1	0.1
	0.1	0.1	0.1	0.1	0.1	0.1	0.1	0.1	0.1	0	0	0
	0.1	0.1	0.1	0.1	0.1	0.1	0	0	0	0	0	0
	0	0	0	0.1	0.1	0.1	0	0	0	0	0	0
	0.1	0.1	0.1	0.1	0.1	0.1	0	0	0	0	0	0
	0	0	0	0.1	0.1	0.1	0.1	0.1	0.1	0.1	0.1	0.1
	0.1	0.1	0.1	0	0	0	0	0	0	0	0	0
	0.1	0.1	0.1	0.1	0.1	0.1	0	0	0	0.4	0.3	0
	0.1	0.1	0.1	0.1	0.1	0.1	0.1	0.1	0.1	0	0	0
	0	0	0	0.1	0.1	0.1	0	0	0	0	0	0
	0	0	0	0.1	0.1	0.1	0	0	0	0	0	0
	0.1	0.1	0.1	0.1	0.1	0.1	0	0	0	0	0	0
	0	0	0	0.1	0.1	0.1	0	0	0	0	0	0
	0.1	0.1	0.1	0.1	0.1	0.1	0	0	0	0	0	0
	0.1	0.1	0.1	0.1	0.1	0.1	0	0	0	0	0	0
	0.1	0.1	0.1	0	0	0	0	0	0	0.1	0.1	0.1
	0.1	0.1	0.1	0.1	0.1	0.1	0	0	0	0	0	0
	0.1	0.1	0.1	0.1	0.1	0.1	0	0	0	0	0	0
	0.1	0.1	0.1	0.1	0.1	0.1	0	0	0	0	0	0
	0.1	0.1	0.1	0.1	0.1	0.1	0	0	0	0	0	0
	0	0	0	0.1	0.1	0.1	0	0	0	0	0	0
	0.1	0.1	0.1	0.1	0.1	0.1	0	0	0	0	0	0
	0	0	0	0.1	0.1	0.1	0.1	0.1	0.1	0	0	0
	0.1	0.1	0.1	0.1	0.1	0.1	0.1	0.1	0.1	0	0	0
	0.1	0.1	0.1	0.1	0.1	0.1	0	0	0	0	0	0
	0.1	0.1	0.1	0	0	0	0	0	0	0	0	0
	0.2	0.2	0.1	0.1	0.1	0.1	0	0	0	0.1	0.1	0.1
	0	0	0	0	0	0	0	0	0	0	0	0
	0	0	0	0.1	0.1	0.1	0	0	0	0	0	0
	0.1	0.1	0.1	0.1	0.1	0.1	0	0	0	0	0	0
	0.1	0.1	0.1	0.1	0.1	0.1	0	0	0	0	0	0
	0.1	0.1	0.1	0.1	0.1	0.1	0	0	0	0	0	0
	0.2	0.2	0.1	0.2	0.2	0.2	0	0	0	0	0	0
	0	0	0	0.1	0.1	0.1	0	0	0	0	0	0
	0.1	0.1	0.1	0.1	0.1	0.1	0	0	0	0.1	0.1	0.1
	0.1	0.1	0.1	0.1	0.1	0.1	0	0	0	0.1	0.1	0.1
	0.1	0.1	0.1	0.1	0.1	0.1	0	0	0	0.1	0.1	0.1
	0	0	0	0.1	0.1	0.1	0	0	0	0	0	0
	0.1	0.1	0.1	0	0	0	0	0	0	0	0	0
	0	0	0	0.1	0.1	0.1	0	0	0	0	0	0
	0.1	0.1	0.1	0.1	0.1	0.1	0	0	0	0	0	0
	0.1	0.1	0.1	0.1	0.1	0.1	0	0	0	0	0	0
	0.1	0.1	0.1	0.1	0.1	0.1	0	0	0	0.1	0.1	0.1
	0	0	0	0.1	0.1	0.1	0	0	0	0	0	0
	0	0	0	0.1	0.1	0.1	0	0	0	0	0	0
	0	0	0	0.1	0.1	0.1	0	0	0	0.1	0.1	0.1
	0	0	0	0.1	0.1	0.1	0.1	0.1	0.1	0	0	0
	0.1	0.1	0.1	0.1	0.1	0.1	0	0	0	0	0	0
	0.1	0.1	0.1	0.1	0.1	0.1	0	0	0	0	0	0
	0.1	0.1	0.1	0.1	0.1	0.1	0.1	0.1	0.1	0.1	0.1	0.1
	0.1	0.1	0.1	0.1	0.1	0.1	0	0	0	0	0	0
	0.1	0.1	0.1	0.1	0.1	0.1	0	0	0	0	0	0
	0	0	0	0.1	0.1	0.1	0	0	0	0	0	0
	0.1	0.1	0.1	0.1	0.1	0.1	0	0	0	0.1	0.1	0.1
	0.1	0.1	0.1	0.1	0.1	0.1	0.1	0.1	0.1	0.1	0.1	0.1
	0.1	0.1	0.1	0.2	0.2	0.2	0	0	0	0	0	0
	0.1	0.1	0.1	0.1	0.1	0.1	0	0	0	0	0	0
	0.1	0.1	0.1	0.1	0.1	0.1	0	0	0	0.1	0.1	0.1
	0.1	0.1	0.1	0.1	0.1	0.1	0	0	0	0.1	0.1	0.1
	0.1	0.1	0.1	0.1	0.1	0.1	0	0	0	0	0	0
	0	0	0	0.1	0.1	0.1	0.1	0.1	0.1	0	0	0
	0	0	0	0.1	0.1	0.1	0.1	0.1	0.1	0	0	0
	0.1	0.1	0.1	0.1	0.1	0.1	0	0	0	0.1	0.1	0.1
	0.1	0.1	0.1	0	0	0	0	0	0	0	0	0
	0.1	0.1	0.1	0.1	0.1	0.1	0	0	0	0	0	0
	0.1	0.1	0.1	0.1	0.1	0.1	0	0	0	0	0	0
	0.1	0.1	0.1	0.1	0.1	0.1	0	0	0	0	0	0
	0	0	0	0.1	0.1	0.1	0	0	0	0.1	0.1	0.1
	0.1	0.1	0.1	0	0	0	0	0	0	0	0	0
	0.1	0.1	0.1	0.1	0.1	0.1	0	0	0	0.1	0.1	0.1
	0.1	0.1	0.1	0.1	0.1	0.1	0.1	0.1	0.1	0	0	0
	0	0	0	0	0	0	0	0	0	0.1	0.1	0.1
	0.1	0.1	0.1	0	0	0	0.1	0.1	0.1	0	0	0
	0.1	0.1	0.1	0.1	0.1	0.1	0	0	0	0	0	0
	0.1	0.1	0.1	0.1	0.1	0.1	0	0	0	0	0	0
	0.1	0.1	0.1	0.1	0.1	0.1	0.1	0.1	0.1	0	0	0
	0.1	0.1	0.1	0.1	0.1	0.1	0.1	0.1	0.1	0	0	0
	0	0	0	0.1	0.1	0.1	0	0	0	0.1	0.1	0.1
	0.1	0.1	0.1	0.1	0.1	0.1	0	0	0	0.1	0.1	0.1
	0.3	0.3	0.1	0.1	0.1	0.1	0	0	0	0	0	0
	0.1	0.1	0.1	0.1	0.1	0.1	0.1	0.1	0.1	0.1	0.1	0.1
	0.1	0.1	0.1	0.1	0.1	0.1	0	0	0	0	0	0
	0.1	0.1	0.1	0.1	0.1	0.1	0	0	0	0.1	0.1	0.1
	0.1	0.1	0.1	0.1	0.1	0.1	0	0	0	0	0	0
	0.1	0.1	0.1	0.1	0.1	0.1	0	0	0	0	0	0
	0.1	0.1	0.1	0.1	0.1	0.1	0	0	0	0	0	0
	0.1	0.1	0.1	0.1	0.1	0.1	0	0	0	0	0	0
	0.1	0.1	0.1	0.1	0.1	0.1	0	0	0	0	0	0
	0	0	0	0.1	0.1	0.1	0	0	0	0	0	0
	0.1	0.1	0.1	0.1	0.1	0.1	0	0	0	0	0	0
	0.1	0.1	0.1	0.1	0.1	0.1	0	0	0	0	0	0
	0	0	0	0.1	0.1	0.1	0	0	0	0	0	0
	0.1	0.1	0.1	0.1	0.1	0.1	0	0	0	0	0	0
	0.1	0.1	0.1	0	0	0	0	0	0	0	0	0
	0	0	0	0.1	0.1	0.1	0	0	0	0.1	0.1	0.1
	0	0	0	0.1	0.1	0.1	0	0	0	0	0	0
	0.1	0.1	0.1	0.1	0.1	0.1	0	0	0	0	0	0
	0	0	0	0.1	0.1	0.1	0	0	0	0.1	0.1	0.1
	0.1	0.1	0.1	0.1	0.1	0.1	0.1	0.1	0.1	0.1	0.1	0.1
	0.1	0.1	0.1	0	0	0	0	0	0	0	0	0
	0	0	0	0.1	0.1	0.1	0	0	0	0.1	0.1	0.1
	0	0	0	0.1	0.1	0.1	0	0	0	0	0	0
	0.1	0.1	0.1	0.1	0.1	0.1	0	0	0	0	0	0
	0.1	0.1	0.1	0.1	0.1	0.1	0	0	0	0	0	0
	0.1	0.1	0.1	0.1	0.1	0.1	0	0	0	0	0	0
	0.1	0.1	0.1	0.1	0.1	0.1	0	0	0	0	0	0
	0	0	0	0.1	0.1	0.1	0	0	0	0	0	0
	0.1	0.1	0.1	0.1	0.1	0.1	0	0	0	0.1	0.1	0.1
	0.1	0.1	0.1	0.1	0.1	0.1	0	0	0	0	0	0
	0	0	0	0.1	0.1	0.1	0	0	0	0	0	0
	0	0	0	0.1	0.1	0.1	0.1	0.1	0.1	0.1	0.1	0.1
	0.2	0.2	0.1	0.1	0.1	0.1	0	0	0	0	0	0
	0.1	0.1	0.1	1	0.6	0.1	0	0	0	0	0	0
	0.1	0.1	0.1	0.1	0.1	0.1	0.1	0.1	0.1	0.1	0.1	0.1
	0.1	0.1	0.1	0.1	0.1	0.1	0	0	0	0.1	0.1	0.1
	0.1	0.1	0.1	0	0	0	0	0	0	0	0	0
	0	0	0	0.1	0.1	0.1	0	0	0	0	0	0
	0.1	0.1	0.1	0.1	0.1	0.1	0	0	0	0	0	0
	0	0	0	0	0	0	0.1	0.1	0.1	0.1	0.1	0.1
	0	0	0	0.1	0.1	0.1	0	0	0	0	0	0
	0.1	0.1	0.1	0.1	0.1	0.1	0	0	0	0.1	0.1	0.1
	0.1	0.1	0.1	0	0	0	0.1	0.1	0.1	0	0	0
	0.1	0.1	0.1	0.1	0.1	0.1	0	0	0	0.1	0.1	0.1
	0.1	0.1	0.1	0.1	0.1	0.1	0.1	0.1	0.1	0.1	0.1	0.1
	0	0	0	0.1	0.1	0.1	0	0	0	0	0	0
	0.1	0.1	0.1	0.1	0.1	0.1	0	0	0	0	0	0
	0.1	0.1	0.1	0.1	0.1	0.1	0	0	0	0	0	0
	0	0	0	0.1	0.1	0.1	0	0	0	0.1	0.1	0.1
	0.1	0.1	0.1	0.1	0.1	0.1	0.1	0.1	0.1	0.1	0.1	0.1
	0.1	0.1	0.1	0.1	0.1	0.1	0	0	0	0	0	0
	0.1	0.1	0.1	0.1	0.1	0.1	0	0	0	0	0	0
	0.1	0.1	0.1	0.1	0.1	0.1	0	0	0	0.1	0.1	0.1
	0	0	0	0.1	0.1	0.1	0	0	0	0.1	0.1	0.1
	0.1	0.1	0.1	0	0	0	0.1	0.1	0.1	0.1	0.1	0.1
	0	0	0	0.1	0.1	0.1	0	0	0	0	0	0
	0	0	0	0.1	0.1	0.1	0	0	0	0	0	0
	0.1	0.1	0.1	0.1	0.1	0.1	0.1	0.1	0.1	0.1	0.1	0.1
	0.1	0.1	0.1	0.1	0.1	0.1	0	0	0	0	0	0
	0.1	0.1	0.1	0.1	0.1	0.1	0	0	0	0.1	0.1	0.1
	0.1	0.1	0.1	0.1	0.1	0.1	0	0	0	0.1	0.1	0.1
	0.1	0.1	0.1	0.1	0.1	0.1	0	0	0	0	0	0
	0.1	0.1	0.1	0.1	0.1	0.1	0	0	0	0.1	0.1	0.1
	0.1	0.1	0.1	0.1	0.1	0.1	0	0	0	0	0	0
	0.1	0.1	0.1	0.1	0.1	0.1	0	0	0	0	0	0
	0.1	0.1	0.1	0.2	0.2	0.1	0.1	0.1	0.1	0	0	0
	0.1	0.1	0.1	0.1	0.1	0.1	0	0	0	0	0	0
	0	0	0	0.1	0.1	0.1	0	0	0	0	0	0
	0	0	0	0.1	0.1	0.1	0	0	0	0	0	0
	0	0	0	0.1	0.1	0.1	0	0	0	0	0	0
	0.1	0.1	0.1	0.1	0.1	0.1	0	0	0	0	0	0
	0	0	0	0.1	0.1	0.1	0	0	0	0	0	0
	0	0	0	0.1	0.1	0.1	0	0	0	0.1	0.1	0.1
	0	0	0	0.1	0.1	0.1	0.1	0.1	0.1	0	0	0
	0.1	0.1	0.1	0.1	0.1	0.1	0.1	0.1	0.1	0.1	0.1	0.1
	0.1	0.1	0.1	0	0	0	0.1	0.1	0.1	0	0	0
	0.1	0.1	0.1	0.1	0.1	0.1	0	0	0	0.1	0.1	0.1
	0	0	0	0.1	0.1	0.1	0	0	0	0	0	0
	0.1	0.1	0.1	0.1	0.1	0.1	0	0	0	0	0	0
	0	0	0	0.1	0.1	0.1	0	0	0	0	0	0
	0.1	0.1	0.1	0.1	0.1	0.1	0	0	0	0.1	0.1	0.1
	0	0	0	0.1	0.1	0.1	0	0	0	0	0	0
	0	0	0	0.1	0.1	0.1	0	0	0	0	0	0
	0	0	0	0.1	0.1	0.1	0.1	0.1	0.1	0.1	0.1	0.1
	0.1	0.1	0.1	0.1	0.1	0.1	0	0	0	0.1	0.1	0.1
	0.1	0.1	0.1	0.1	0.1	0.1	0	0	0	0.1	0.1	0.1
	0.1	0.1	0.1	0.1	0.1	0.1	0.1	0.1	0.1	0	0	0
	0.1	0.1	0.1	0.1	0.1	0.1	0	0	0	0	0	0
	0.1	0.1	0.1	0.1	0.1	0.1	0.1	0.1	0.1	0	0	0
	0	0	0	0.1	0.1	0.1	0.1	0.1	0.1	0	0	0
	0.1	0.1	0.1	0.1	0.1	0.1	0.1	0.1	0.1	0	0	0
	0.1	0.1	0.1	0.1	0.1	0.1	0	0	0	0	0	0
	0	0	0	0.1	0.1	0.1	0	0	0	0	0	0
	0	0	0	0.1	0.1	0.1	0	0	0	0	0	0
	0.1	0.1	0.1	0.1	0.1	0.1	0	0	0	0	0	0
	0.1	0.1	0.1	0.1	0.1	0.1	0	0	0	0.1	0.1	0.1
	0.1	0.1	0.1	0.1	0.1	0.1	0	0	0	0	0	0
	0.1	0.1	0.1	0.1	0.1	0.1	0	0	0	0	0	0
	0.1	0.1	0.1	0.1	0.1	0.1	0	0	0	0	0	0
	0.1	0.1	0.1	0.1	0.1	0.1	0	0	0	0.1	0.1	0.1
	0	0	0	0.1	0.1	0.1	0	0	0	0	0	0
	0.1	0.1	0.1	0.1	0.1	0.1	0.1	0.1	0.1	0.1	0.1	0.1
	0.1	0.1	0.1	0.1	0.1	0.1	0	0	0	0	0	0
	0.1	0.1	0.1	0.1	0.1	0.1	0	0	0	0.1	0.1	0.1
	0.1	0.1	0.1	0.1	0.1	0.1	0	0	0	0	0	0
	0.1	0.1	0.1	0.1	0.1	0.1	0.1	0.1	0.1	0	0	0
	0.1	0.1	0.1	0.1	0.1	0.1	0.1	0.1	0.1	0	0	0
	0.1	0.1	0.1	0.1	0.1	0.1	0	0	0	0	0	0
	0.1	0.1	0.1	0	0	0	0	0	0	0.1	0.1	0.1
	0	0	0	0.1	0.1	0.1	0	0	0	0	0	0
	0.1	0.1	0.1	0.1	0.1	0.1	0.1	0.1	0.1	0.1	0.1	0.1
	0.1	0.1	0.1	0.1	0.1	0.1	0	0	0	0	0	0
	0	0	0	0.1	0.1	0.1	0	0	0	0	0	0
	0.1	0.1	0.1	0	0	0	0	0	0	0	0	0
	0	0	0	0.1	0.1	0.1	0	0	0	0	0	0
	0	0	0	0.1	0.1	0.1	0.1	0.1	0.1	0	0	0
	0.1	0.1	0.1	0.1	0.1	0.1	0.1	0.1	0.1	0	0	0
	0.1	0.1	0.1	0.1	0.1	0.1	0	0	0	0.1	0.1	0.1
	0.1	0.1	0.1	0.1	0.1	0.1	0.1	0.1	0.1	0.1	0.1	0.1
	0.1	0.1	0.1	0.1	0.1	0.1	0	0	0	0	0	0
	0.1	0.1	0.1	0.1	0.1	0.1	0	0	0	0	0	0
	0	0	0	0.1	0.1	0.1	0	0	0	0.1	0.1	0.1
	0.1	0.1	0.1	0.1	0.1	0.1	0	0	0	0	0	0
	0.1	0.1	0.1	0.1	0.1	0.1	0.1	0.1	0.1	0.1	0.1	0.1
	0	0	0	0.1	0.1	0.1	0	0	0	0	0	0
	0	0	0	0.1	0.1	0.1	0	0	0	0.1	0.1	0.1
	0.1	0.1	0.1	0.1	0.1	0.1	0	0	0	0.1	0.1	0.1
	0.1	0.1	0.1	0.1	0.1	0.1	0	0	0	0	0	0
	0.1	0.1	0.1	0.1	0.1	0.1	0.1	0.1	0.1	0.1	0.1	0.1
	0.1	0.1	0.1	0.1	0.1	0.1	0	0	0	0	0	0
	0.1	0.1	0.1	0.1	0.1	0.1	0.1	0.1	0.1	0	0	0
	0	0	0	0	0	0	0	0	0	0	0	0
	0.1	0.1	0.1	0.1	0.1	0.1	0.1	0.1	0.1	0	0	0
	0.1	0.1	0.1	0	0	0	0	0	0	0	0	0
	0.1	0.1	0.1	0.1	0.1	0.1	0	0	0	0	0	0
	0	0	0	0.1	0.1	0.1	0	0	0	0	0	0
	0	0	0	0.1	0.1	0.1	0	0	0	0	0	0
	0.1	0.1	0.1	0.1	0.1	0.1	0	0	0	0	0	0
	0.1	0.1	0.1	0.1	0.1	0.1	0	0	0	0.1	0.1	0.1
	0	0	0	0.1	0.1	0.1	0	0	0	0	0	0
	0	0	0	0.1	0.1	0.1	0	0	0	0	0	0
	0.1	0.1	0.1	0.1	0.1	0.1	0.1	0.1	0.1	0	0	0
	0	0	0	0.1	0.1	0.1	0	0	0	0	0	0
	0.1	0.1	0.1	0.1	0.1	0.1	0	0	0	0	0	0
	0	0	0	0.1	0.1	0.1	0	0	0	0	0	0
	0.1	0.1	0.1	0.1	0.1	0.1	0	0	0	0	0	0
	0.1	0.1	0.1	0.1	0.1	0.1	0	0	0	0.1	0.1	0.1
	0.1	0.1	0.1	0.1	0.1	0.1	0	0	0	0	0	0
	0.1	0.1	0.1	0.1	0.1	0.1	0	0	0	0	0	0
	0	0	0	0.1	0.1	0.1	0	0	0	0.1	0.1	0.1
	0.1	0.1	0.1	0.1	0.1	0.1	0	0	0	0.1	0.1	0.1
	0.1	0.1	0.1	0.1	0.1	0.1	0	0	0	0	0	0
	0.1	0.1	0.1	0.1	0.1	0.1	0	0	0	0	0	0
	0	0	0	0.1	0.1	0.1	0	0	0	0.1	0.1	0.1
	0.1	0.1	0.1	0.1	0.1	0.1	0.1	0.1	0.1	0.1	0.1	0.1
	0.4	0.4	0.1	0.1	0.1	0.1	0	0	0	0	0	0
	0.1	0.1	0.1	0.1	0.1	0.1	0	0	0	0.1	0.1	0.1
	0.1	0.1	0.1	0.1	0.1	0.1	0.1	0.1	0.1	0.1	0.1	0.1
	0.1	0.1	0.1	0.1	0.1	0.1	0	0	0	0	0	0
	0.1	0.1	0.1	0.1	0.1	0.1	0	0	0	0	0	0
	0.1	0.1	0.1	0.1	0.1	0.1	0	0	0	0	0	0
	0.1	0.1	0.1	0.1	0.1	0.1	0.1	0.1	0.1	0	0	0
	0	0	0	0.1	0.1	0.1	0	0	0	0.1	0.1	0.1
	0.1	0.1	0.1	0.1	0.1	0.1	0	0	0	0.1	0.1	0.1
	0.1	0.1	0.1	0.1	0.1	0.1	0	0	0	0	0	0
	0.1	0.1	0.1	0.1	0.1	0.1	0	0	0	0	0	0
	0.1	0.1	0.1	0.1	0.1	0.1	0	0	0	0.1	0.1	0.1
	0.1	0.1	0.1	0.1	0.1	0.1	0	0	0	0	0	0
	0.1	0.1	0.1	0.1	0.1	0.1	0.1	0.1	0.1	0	0	0
	0.1	0.1	0.1	0.1	0.1	0.1	0	0	0	0	0	0
	0	0	0	0.1	0.1	0.1	0	0	0	0.1	0.1	0.1
	0.1	0.1	0.1	0.1	0.1	0.1	0.1	0.1	0.1	0	0	0
	0	0	0	0.1	0.1	0.1	0	0	0	0.1	0.1	0.1
	0.1	0.1	0.1	0.1	0.1	0.1	0	0	0	0	0	0
	0.1	0.1	0.1	0.1	0.1	0.1	0	0	0	0.1	0.1	0.1
	0.1	0.1	0.1	0.1	0.1	0.1	0	0	0	0	0	0
	0	0	0	0.1	0.1	0.1	0	0	0	0	0	0
	0	0	0	0.1	0.1	0.1	0	0	0	0.1	0.1	0.1
	0.1	0.1	0.1	0.1	0.1	0.1	0	0	0	0	0	0
	0.2	0.2	0.1	0.1	0.1	0.1	0	0	0	0.1	0.1	0.1
	0.1	0.1	0.1	0.1	0.1	0.1	0.1	0.1	0.1	0	0	0
	0.1	0.1	0.1	0.1	0.1	0.1	0	0	0	0	0	0
	0.1	0.1	0.1	0.1	0.1	0.1	0	0	0	0.1	0.1	0.1
	0	0	0	0.1	0.1	0.1	0	0	0	0.1	0.1	0.1
	0.1	0.1	0.1	0.1	0.1	0.1	0	0	0	0	0	0
	0.1	0.1	0.1	0.1	0.1	0.1	0	0	0	0.1	0.1	0.1
	0	0	0	0.1	0.1	0.1	0	0	0	0	0	0
	0.1	0.1	0.1	0.1	0.1	0.1	0	0	0	0.1	0.1	0.1
	0.3	0.3	0.1	0.1	0.1	0.1	0	0	0	0	0	0
	0.1	0.1	0.1	0.1	0.1	0.1	0	0	0	0	0	0
	0	0	0	0	0	0	0	0	0	0	0	0
	0	0	0	0.1	0.1	0.1	0	0	0	0	0	0
	0.1	0.1	0.1	0.1	0.1	0.1	0	0	0	0	0	0
	0.1	0.1	0.1	0.1	0.1	0.1	0	0	0	0	0	0
	0	0	0	0.1	0.1	0.1	0	0	0	0	0	0
	0.1	0.1	0.1	0.1	0.1	0.1	0	0	0	0	0	0
	0	0	0	0.1	0.1	0.1	0	0	0	0	0	0
	0	0	0	0.1	0.1	0.1	0.1	0.1	0.1	0	0	0
	0.1	0.1	0.1	0.1	0.1	0.1	0	0	0	0	0	0
	0.1	0.1	0.1	0.1	0.1	0.1	0	0	0	0	0	0
	0	0	0	0.1	0.1	0.1	0	0	0	0	0	0
	0.1	0.1	0.1	0.1	0.1	0.1	0	0	0	0	0	0
	0.1	0.1	0.1	0.1	0.1	0.1	0	0	0	0	0	0
	0.1	0.1	0.1	0.1	0.1	0.1	0	0	0	0	0	0
	0	0	0	0.1	0.1	0.1	0	0	0	0.1	0.1	0.1
	0	0	0	0.1	0.1	0.1	0	0	0	0	0	0
	0.1	0.1	0.1	0.1	0.1	0.1	0	0	0	0	0	0
	0.1	0.1	0.1	0.1	0.1	0.1	0	0	0	0.1	0.1	0.1
	0.1	0.1	0.1	0.1	0.1	0.1	0	0	0	0	0	0
	0	0	0	0.1	0.1	0.1	0	0	0	0	0	0
	0	0	0	0	0	0	0	0	0	0.1	0.1	0.1
	0.1	0.1	0.1	0	0	0	0	0	0	0.1	0.1	0.1
	0	0	0	0.1	0.1	0.1	0	0	0	0	0	0
	0	0	0	0.1	0.1	0.1	0	0	0	0	0	0
	0	0	0	0.1	0.1	0.1	0	0	0	0	0	0
	0.1	0.1	0.1	0.1	0.1	0.1	0.1	0.1	0.1	0.1	0.1	0.1
	0.1	0.1	0.1	0.1	0.1	0.1	0.1	0.1	0.1	0	0	0
	0.1	0.1	0.1	0.1	0.1	0.1	0	0	0	0	0	0
	0.1	0.1	0.1	0	0	0	0	0	0	0.1	0.1	0.1
	0.1	0.1	0.1	0.1	0.1	0.1	0	0	0	0.1	0.1	0.1
	0.2	0.2	0.1	0.1	0.1	0.1	0	0	0	0.1	0.1	0.1
	0.1	0.1	0.1	0.1	0.1	0.1	0.1	0.1	0.1	0	0	0
	0	0	0	0.1	0.1	0.1	0	0	0	0	0	0
	0.1	0.1	0.1	0.1	0.1	0.1	0	0	0	0.1	0.1	0.1
	0.1	0.1	0.1	0.1	0.1	0.1	0	0	0	0.1	0.1	0.1
	0.1	0.1	0.1	0.1	0.1	0.1	0	0	0	0.1	0.1	0.1
	0.1	0.1	0.1	0.1	0.1	0.1	0	0	0	0	0	0
	0.1	0.1	0.1	0.1	0.1	0.1	0	0	0	0	0	0
	0.1	0.1	0.1	0.2	0.2	0.2	0	0	0	0.1	0.1	0.1
	0.1	0.1	0.1	0.1	0.1	0.1	0	0	0	0.1	0.1	0.1
	0	0	0	0.1	0.1	0.1	0.1	0.1	0.1	0.1	0.1	0.1
	0.1	0.1	0.1	0.1	0.1	0.1	0	0	0	0	0	0
	0.1	0.1	0.1	0.1	0.1	0.1	0	0	0	0.1	0.1	0.1
	0.1	0.1	0.1	0.1	0.1	0.1	0.1	0.1	0.1	0	0	0
	0.1	0.1	0.1	0	0	0	0.1	0.1	0.1	0	0	0
	0.1	0.1	0.1	0.1	0.1	0.1	0.1	0.1	0.1	0.1	0.1	0.1
	0.1	0.1	0.1	0.1	0.1	0.1	0	0	0	0.1	0.1	0.1
	0.1	0.1	0.1	0.1	0.1	0.1	0	0	0	0.1	0.1	0.1
	0.1	0.1	0.1	0.1	0.1	0.1	0	0	0	0	0	0
	0.1	0.1	0.1	0.1	0.1	0.1	0	0	0	0.1	0.1	0.1
	0	0	0	0.1	0.1	0.1	0	0	0	0	0	0
	0.1	0.1	0.1	0.1	0.1	0.1	0	0	0	0.1	0.1	0.1
	0	0	0	0.1	0.1	0.1	0	0	0	0.1	0.1	0.1
	0.1	0.1	0.1	0.1	0.1	0.1	0	0	0	0.1	0.1	0.1
	0.1	0.1	0.1	0.1	0.1	0.1	0	0	0	0.1	0.1	0.1
	0.1	0.1	0.1	0.1	0.1	0.1	0.1	0.1	0.1	0	0	0
	0.1	0.1	0.1	0.1	0.1	0.1	0	0	0	0	0	0
	0.1	0.1	0.1	0.1	0.1	0.1	0	0	0	0	0	0
	0.1	0.1	0.1	0	0	0	0	0	0	0.1	0.1	0.1
	0	0	0	0.1	0.1	0.1	0	0	0	0.1	0.1	0.1
	0.1	0.1	0.1	0.1	0.1	0.1	0	0	0	0	0	0
	0.1	0.1	0.1	0.1	0.1	0.1	0.1	0.1	0.1	0	0	0
	0	0	0	0.1	0.1	0.1	0	0	0	0.1	0.1	0.1
	0.1	0.1	0.1	0.1	0.1	0.1	0	0	0	0	0	0
	0.1	0.1	0.1	0.1	0.1	0.1	0	0	0	0	0	0
	0.1	0.1	0.1	0.1	0.1	0.1	0.1	0.1	0.1	0	0	0
	0.1	0.1	0.1	0.1	0.1	0.1	0	0	0	0.1	0.1	0.1
	0.1	0.1	0.1	0.1	0.1	0.1	0.1	0.1	0.1	0.1	0.1	0.1
	0	0	0	0.1	0.1	0.1	0	0	0	0.1	0.1	0.1
	0.1	0.1	0.1	0.1	0.1	0.1	0	0	0	0	0	0
	0.1	0.1	0.1	0.1	0.1	0.1	0	0	0	0	0	0
	0	0	0	0.1	0.1	0.1	0	0	0	0	0	0
	0.1	0.1	0.1	0.1	0.1	0.1	0	0	0	0	0	0
	0	0	0	0.1	0.1	0.1	0	0	0	0.1	0.1	0.1
	0.1	0.1	0.1	0.1	0.1	0.1	0	0	0	0.1	0.1	0.1
	0.1	0.1	0.1	0	0	0	0	0	0	0	0	0
	0.1	0.1	0.1	0.1	0.1	0.1	0.1	0.1	0.1	0	0	0
	0.1	0.1	0.1	0.1	0.1	0.1	0	0	0	0	0	0
	0	0	0	0.1	0.1	0.1	0.1	0.1	0	0	0	0
	0.2	0.2	0.2	0.1	0.1	0.1	0	0	0	0.1	0.1	0.1
	0.1	0.1	0.1	0.1	0.1	0.1	0	0	0	0	0	0
	0.1	0.1	0.1	0	0	0	0	0	0	0	0	0
	0.1	0.1	0.1	0.1	0.1	0.1	0	0	0	0.1	0.1	0.1
	0	0	0	0.1	0.1	0.1	0	0	0	0.1	0.1	0.1
	0.1	0.1	0.1	0.1	0.1	0.1	0	0	0	0	0	0
	0.1	0.1	0.1	0.1	0.1	0.1	0	0	0	0.1	0.1	0.1
	0.1	0.1	0.1	0.1	0.1	0.1	0	0	0	0.1	0.1	0.1
	0.1	0.1	0.1	0.1	0.1	0.1	0	0	0	0	0	0
	0.1	0.1	0.1	0.1	0.1	0.1	0	0	0	0.1	0.1	0.1
	0	0	0	0.1	0.1	0.1	0.1	0.1	0.1	0	0	0
	0.1	0.1	0.1	0.1	0.1	0.1	0	0	0	0	0	0
	0.1	0.1	0.1	0.1	0.1	0.1	0	0	0	0.1	0.1	0.1
	0	0	0	0.1	0.1	0.1	0	0	0	0	0	0
	0.1	0.1	0.1	0.1	0.1	0.1	0	0	0	0.1	0.1	0.1
	0.2	0.2	0.1	0.1	0.1	0.1	0	0	0	0	0	0
	0.1	0.1	0.1	0.1	0.1	0.1	0	0	0	0.1	0.1	0
	0	0	0	0.1	0.1	0.1	0	0	0	0.1	0.1	0.1
	0.1	0.1	0.1	0.1	0.1	0.1	0	0	0	0.1	0.1	0.1
	0.1	0.1	0.1	0.1	0.1	0.1	0	0	0	0	0	0
	0.1	0.1	0.1	0.1	0.1	0.1	0	0	0	0.1	0.1	0.1
	0.1	0.1	0.1	0.1	0.1	0.1	0	0	0	0.1	0.1	0.1
	0	0	0	0.1	0.1	0.1	0	0	0	0	0	0
	0	0	0	0	0	0	0	0	0	0.1	0.1	0.1
	0	0	0	0	0	0	0	0	0	0.1	0.1	0.1
	0	0	0	0.1	0.1	0.1	0	0	0	0.1	0.1	0.1
	0	0	0	0.1	0.1	0.1	0	0	0	0	0	0
	0.1	0.1	0.1	0.1	0.1	0.1	0	0	0	0.1	0.1	0.1
	0	0	0	0.1	0.1	0.1	0	0	0	0.1	0.1	0.1
	0.1	0.1	0.1	0.1	0.1	0.1	0	0	0	0.1	0.1	0.1
	0.1	0.1	0.1	0.1	0.1	0.1	0.1	0.1	0.1	0	0	0
	0.1	0.1	0.1	0.1	0.1	0.1	0	0	0	0.1	0.1	0.1
	0	0	0	0.1	0.1	0.1	0	0	0	0	0	0
	0	0	0	0.1	0.1	0.1	0.1	0.1	0.1	0.1	0.1	0.1
	0.1	0.1	0.1	0.1	0.1	0.1	0	0	0	0	0	0
	0	0	0	0	0	0	0	0	0	0.1	0.1	0.1
	0.1	0.1	0.1	0.1	0.1	0.1	0	0	0	0.1	0.1	0.1
	0.1	0.1	0.1	0.1	0.1	0.1	0	0	0	0	0	0
	0.1	0.1	0.1	0.1	0.1	0.1	0	0	0	0.1	0.1	0.1
	0.1	0.1	0.1	0.1	0.1	0.1	0	0	0	0.1	0.1	0.1
	0.1	0.1	0.1	0.1	0.1	0.1	0.1	0.1	0.1	0	0	0
	0	0	0	0.1	0.1	0.1	0	0	0	0.1	0.1	0.1
	0.1	0.1	0.1	0.1	0.1	0.1	0	0	0	0	0	0
	0	0	0	0.1	0.1	0.1	0	0	0	0.1	0.1	0.1
	0.1	0.1	0.1	0.2	0.2	0.2	0	0	0	0.1	0.1	0.1
	0.1	0.1	0.1	0.1	0.1	0.1	0	0	0	0.1	0.1	0.1
	0	0	0	0.1	0.1	0.1	0	0	0	0	0	0
	0	0	0	0.1	0.1	0.1	0.1	0.1	0.1	0.1	0.1	0.1
	0.1	0.1	0.1	0	0	0	0	0	0	0	0	0
	0.1	0.1	0.1	0.1	0.1	0.1	0	0	0	0.1	0.1	0.1
	0	0	0	0.1	0.1	0.1	0	0	0	0.1	0.1	0.1
	0.1	0.1	0.1	0.1	0.1	0.1	0	0	0	0	0	0
	0.1	0.1	0.1	0.1	0.1	0.1	0	0	0	0	0	0
	0	0	0	0.1	0.1	0.1	0	0	0	0	0	0
	0.1	0.1	0.1	0.1	0.1	0.1	0	0	0	0.1	0.1	0.1
	0.1	0.1	0.1	0.1	0.1	0.1	0.1	0.1	0.1	0.1	0.1	0.1
	0.1	0.1	0.1	0.1	0.1	0.1	0	0	0	0	0	0
	0.1	0.1	0.1	0.1	0.1	0.1	0	0	0	0.1	0.1	0.1
	0.1	0.1	0.1	0.1	0.1	0.1	0.1	0.1	0.1	0	0	0
	0.1	0.1	0.1	0.1	0.1	0.1	0	0	0	0	0	0
	0	0	0	0.1	0.1	0.1	0	0	0	0	0	0
	0.1	0.1	0.1	0.1	0.1	0.1	0	0	0	0.1	0.1	0.1
	0	0	0	0.1	0.1	0.1	0	0	0	0	0	0
	0.1	0.1	0.1	0.1	0.1	0.1	0	0	0	0	0	0
	0	0	0	0.1	0.1	0.1	0	0	0	0	0	0
	0.1	0.1	0.1	0.1	0.1	0.1	0.1	0.1	0.1	0.1	0.1	0.1
	0.1	0.1	0.1	0.1	0.1	0.1	0	0	0	0.1	0.1	0.1
	0	0	0	0.1	0.1	0.1	0	0	0	0	0	0
	0.1	0.1	0.1	0.1	0.1	0.1	0	0	0	0.1	0.1	0.1
	0.1	0.1	0.1	0.1	0.1	0.1	0	0	0	0.1	0.1	0.1
	0.1	0.1	0.1	0.1	0.1	0.1	0.1	0.1	0.1	0.1	0.1	0.1
	0.1	0.1	0.1	0.1	0.1	0.1	0	0	0	0	0	0
	0	0	0	0.1	0.1	0.1	0	0	0	0.2	0.2	0.1
	0.2	0.2	0.1	0.1	0.1	0.1	0	0	0	0	0	0
	0.1	0.1	0.1	0.1	0.1	0.1	0	0	0	0.1	0.1	0.1
	0	0	0	0.1	0.1	0.1	0	0	0	0	0	0
	0.1	0.1	0.1	0.1	0.1	0.1	0.1	0.1	0.1	0.1	0.1	0.1
	0.1	0.1	0.1	0	0	0	0	0	0	0	0	0
	0.1	0.1	0.1	0.1	0.1	0.1	0	0	0	0.1	0.1	0.1
	0.1	0.1	0.1	0.1	0.1	0.1	0	0	0	0.1	0.1	0.1
	0.1	0.1	0.1	0.1	0.1	0.1	0	0	0	0.1	0.1	0.1
	0.1	0.1	0.1	0.1	0.1	0.1	0.1	0.1	0.1	0.1	0.1	0.1
	0	0	0	0.1	0.1	0.1	0	0	0	0	0	0
	0.1	0.1	0.1	0.1	0.1	0.1	0	0	0	0	0	0
	0	0	0	0.1	0.1	0.1	0	0	0	0.1	0.1	0.1
	0.1	0.1	0.1	0	0	0	0	0	0	0.1	0.1	0.1
	0.1	0.1	0.1	0.1	0.1	0.1	0.1	0.1	0.1	0	0	0
	0	0	0	0.1	0.1	0.1	0	0	0	0.1	0.1	0.1
	0	0	0	0.1	0.1	0.1	0.1	0.1	0.1	0	0	0
	0.1	0.1	0.1	0	0	0	0	0	0	0.1	0.1	0.1
	0.1	0.1	0.1				0.1	0.1	0.1	0.1	0.1	0.1
	0.1	0.1	0.1				0	0	0	0	0	0
	0.1	0.1	0.1				0.1	0.1	0.1	0.1	0.1	0.1
	0.1	0.1	0.1				0	0	0	0.1	0.1	0.1
	0.1	0.1	0.1				0	0	0	0.1	0.1	0.1
	0.1	0.1	0.1				0.7	0.6	0.1	0	0	0
	0.1	0.1	0.1				0	0	0	0	0	0
	0	0	0				0	0	0	0.1	0.1	0.1
	0.1	0.1	0.1				0.1	0.1	0.1	0.1	0.1	0.1
	0.1	0.1	0.1				0	0	0	0	0	0
	0.1	0.1	0.1				0	0	0	0	0	0
	0.1	0.1	0.1				0.1	0.1	0.1	0.1	0.1	0.1
	0.1	0.1	0.1				0	0	0	0.1	0.1	0.1
	0.1	0.1	0.1				0	0	0	0.1	0.1	0.1
	0	0	0				0	0	0	0	0	0
	0.1	0.1	0.1				0	0	0	0.1	0.1	0.1
	0.1	0.1	0.1				0	0	0	0	0	0
	0	0	0				0	0	0	0.1	0.1	0.1
	0	0	0				0	0	0	0.1	0.1	0.1
	0.1	0.1	0.1				0	0	0	0	0	0
	0	0	0				0	0	0	0.1	0.1	0.1
	0.1	0.1	0.1				0	0	0	0.1	0.1	0.1
	0.1	0.1	0.1				0.1	0.1	0.1	0.1	0.1	0.1
	0.1	0.1	0.1				0	0	0	0	0	0
	0.1	0.1	0.1				0	0	0	0	0	0
	0	0	0				0.1	0.1	0.1	0	0	0
	0.1	0.1	0.1				0.1	0.1	0.1	0	0	0
	0.1	0.1	0.1				0	0	0	0.1	0.1	0.1
	0	0	0				0.1	0.1	0.1	0	0	0
	0.1	0.1	0.1				0	0	0	0	0	0
	0.1	0.1	0.1				0	0	0	0	0	0
	0.1	0.1	0.1				0	0	0	0.1	0.1	0.1
	0	0	0				0	0	0	0	0	0
	0.1	0.1	0.1				0	0	0	0	0	0
	0.1	0.1	0.1				0	0	0	0.1	0.1	0.1
	0	0	0				0	0	0	0	0	0
	0.1	0.1	0.1				0.1	0.1	0.1	0	0	0
	0.1	0.1	0.1				0	0	0	0	0	0
	0.1	0.1	0.1				0.1	0.1	0.1	0.1	0.1	0.1
	0.1	0.1	0.1				0	0	0	0.1	0.1	0.1
	0	0	0				0	0	0	0	0	0
	0.1	0.1	0.1				0	0	0	0.1	0.1	0.1
	0.1	0.1	0.1							0	0	0
	0.1	0.1	0.1							0.1	0.1	0.1
	0.1	0.1	0.1							0	0	0
	0.1	0.1	0.1							0	0	0
	0.1	0.1	0.1							0	0	0
	0	0	0							0	0	0
	0.1	0.1	0.1							0.1	0.1	0.1
	0.1	0.1	0.1							0.1	0.1	0.1
	0	0	0							0	0	0
	0.1	0.1	0.1							0	0	0
	0.1	0.1	0.1							0.1	0.1	0.1
	0	0	0							0	0	0
	0.1	0.1	0.1							0.1	0.1	0.1
	0.1	0.1	0.1							0.1	0.1	0.1
	0.1	0.1	0.1							0	0	0
	0.1	0.1	0.1							0.1	0.1	0.1
	0.1	0.1	0.1							0	0	0
	0.1	0.1	0.1							0	0	0
	0.1	0.1	0.1							0.1	0.1	0.1
	0.1	0.1	0.1							0.1	0.1	0.1
	0.1	0.1	0.1							0.1	0.1	0.1
	0.1	0.1	0.1							0.1	0.1	0.1
	0	0	0							0.1	0.1	0.1
	0.1	0.1	0.1							0	0	0
	0.1	0.1	0.1							0.1	0.1	0.1
	0.1	0.1	0.1							0.1	0.1	0.1
	0.1	0.1	0.1							0	0	0
	0.1	0.1	0.1							0.1	0.1	0.1
	0	0	0							0	0	0
	0	0	0							0.1	0.1	0.1
	0.1	0.1	0.1							0	0	0
	0.1	0.1	0.1							0	0	0
	0	0	0							0.1	0.1	0.1
	0.1	0.1	0.1							0	0	0
	0.1	0.1	0.1							0.1	0.1	0.1
	0.1	0.1	0.1							0	0	0
	0.1	0.1	0.1							0	0	0
	0.1	0.1	0.1							0.1	0.1	0.1
	0	0	0							0	0	0
	0.1	0.1	0.1							0	0	0
	0	0	0							0.1	0.1	0.1
	0.1	0.1	0.1							0.1	0.1	0.1
	0.1	0.1	0.1							0	0	0
	0.1	0.1	0.1							0.1	0.1	0.1
	0	0	0							0.1	0.1	0.1
	0	0	0							0.1	0.1	0.1
	0.1	0.1	0.1							0	0	0
	0	0	0							0	0	0
	0	0	0							0	0	0
	0	0	0							0	0	0
	0.1	0.1	0.1							0.1	0.1	0.1
	0.1	0.1	0.1							0.1	0.1	0.1
	0	0	0							0.1	0.1	0.1
	0	0	0							0	0	0
	0	0	0							0.1	0.1	0.1
	0.1	0.1	0.1							0	0	0
	0	0	0							0	0	0
	0.1	0.1	0.1							0	0	0
	0.1	0.1	0.1							0.1	0.1	0.1
	0.1	0.1	0.1							0.1	0.1	0.1
	0.1	0.1	0.1							0.1	0.1	0.1
	0.1	0.1	0.1							0.1	0.1	0.1
	0.1	0.1	0.1							0.1	0.1	0.1
	0.1	0.1	0.1							0	0	0
	0.1	0.1	0.1							0	0	0
	0.1	0.1	0.1							0.1	0.1	0.1
	0.1	0.1	0.1							0.1	0.1	0.1
	0.1	0.1	0.1							0	0	0
	0.1	0.1	0.1							0	0	0
	0	0	0							0.1	0.1	0.1
	0.1	0.1	0.1							0	0	0
	0.1	0.1	0.1							0	0	0
	0.1	0.1	0.1							0.1	0.1	0.1
	0.1	0.1	0.1							0	0	0
	0.1	0.1	0.1							0.1	0.1	0.1
	0.1	0.1	0.1							0	0	0
	0.1	0.1	0.1							0.1	0.1	0.1
	0	0	0							0	0	0
	0	0	0							0	0	0
	0.1	0.1	0.1							0	0	0
	0.1	0.1	0.1							0.1	0.1	0.1
	0.1	0.1	0.1							0	0	0
	0.1	0.1	0.1							0	0	0
	0.1	0.1	0.1							0	0	0
	0.1	0.1	0.1							0.1	0.1	0.1
	0.1	0.1	0.1							0	0	0
	0.1	0.1	0.1							0	0	0
	0.1	0.1	0.1							0.1	0.1	0.1
	0	0	0							0	0	0
	0.1	0.1	0.1							0	0	0
	0	0	0							0.1	0.1	0.1
	0.1	0.1	0.1							0	0	0
	0.1	0.1	0.1							0.1	0.1	0.1
	0.1	0.1	0.1							0.1	0.1	0.1
	0.1	0.1	0.1							0.1	0.1	0.1
	0.1	0.1	0.1							0	0	0
	0.1	0.1	0.1							0.1	0.1	0.1
	0	0	0							0.1	0.1	0.1
	0.1	0.1	0.1							0.1	0.1	0.1
	0	0	0							0.1	0.1	0.1
	0.1	0.1	0.1							0	0	0
	0.1	0.1	0.1							0	0	0
	0.1	0.1	0.1							0	0	0
	0.1	0.1	0.1							0	0	0
	0	0	0							0.1	0.1	0.1
	0.1	0.1	0.1							0	0	0
	0.1	0.1	0.1							0.1	0.1	0.1
	0	0	0							0	0	0
	0.1	0.1	0.1							0.1	0.1	0.1
	0	0	0							0	0	0
	0.1	0.1	0.1							0.1	0.1	0.1
	0	0	0							0	0	0
	0.1	0.1	0.1							0.1	0.1	0.1
	0	0	0							0	0	0
	0.2	0.2	0.1							0.1	0.1	0.1
	0.1	0.1	0.1							0.1	0.1	0.1
	0.1	0.1	0.1							0.1	0.1	0.1
	0.1	0.1	0.1							0.1	0.1	0.1
	0.1	0.1	0.1							0	0	0
	0	0	0							0.1	0.1	0.1
	0.1	0.1	0.1							0.1	0.1	0.1
	0.1	0.1	0.1							0.1	0.1	0.1
	0.1	0.1	0.1							0.1	0.1	0.1
	0.1	0.1	0.1							0.1	0.1	0.1
	0.2	0.2	0.2							0.1	0.1	0.1
	0.2	0.2	0.1							0.1	0.1	0.1
	0	0	0							0	0	0
	0.1	0.1	0.1							0.1	0.1	0.1
	0.1	0.1	0.1							0.1	0.1	0.1
	0.1	0.1	0.1							0	0	0
	0.1	0.1	0.1							0.1	0.1	0.1
	0.1	0.1	0.1							0.1	0.1	0.1
	0	0	0							0	0	0
	0	0	0							0.1	0.1	0.1
	0.1	0.1	0.1							0.1	0.1	0.1
	0.1	0.1	0.1							0.1	0.1	0.1
	0.1	0.1	0.1							0.1	0.1	0.1
	0.1	0.1	0.1							0	0	0
	0.1	0.1	0.1							0	0	0
	0	0	0							0	0	0
	0	0	0							0.1	0.1	0.1
	0	0	0							0.1	0.1	0.1
	0.1	0.1	0.1							0	0	0
	0.1	0.1	0.1							0.1	0.1	0.1
	0	0	0							0.1	0.1	0.1
	0.1	0.1	0.1							0	0	0
	0.1	0.1	0.1							0.1	0.1	0.1
	0.1	0.1	0.1							0.1	0.1	0.1
	0	0	0							0	0	0
	0.1	0.1	0.1							0	0	0
	0.2	0.2	0.1							0.1	0.1	0.1
	0.1	0.1	0.1							0.1	0.1	0.1
	0	0	0							0.1	0.1	0.1
	0.1	0.1	0.1							0	0	0
	0	0	0							0.1	0.1	0.1
	0.1	0.1	0.1							0.1	0.1	0.1
	0.1	0.1	0.1							0.1	0.1	0.1
	0	0	0							0.1	0.1	0.1
	0.1	0.1	0.1							0	0	0
	0.1	0.1	0.1							0	0	0
	0.1	0.1	0.1							0	0	0
	0.1	0.1	0.1							0	0	0
	0	0	0							0	0	0
	0.1	0.1	0.1							0	0	0
	0.1	0.1	0.1							0	0	0
	0.1	0.1	0.1							0	0	0
	0.1	0.1	0.1
	0.1	0.1	0.1
	0.1	0.1	0.1
	0	0	0
	0.1	0.1	0.1
	0.1	0.1	0.1
	0.1	0.1	0.1
	0.1	0.1	0.1
	0.1	0.1	0.1
	0	0	0
	0.1	0.1	0.1
	0.1	0.1	0.1
	0.1	0.1	0.1
	0.1	0.1	0.1
	0	0	0
	0.1	0.1	0.1
	0	0	0
	0	0	0
	0	0	0
	0	0	0
	0	0	0
	0	0	0	0	0	0	0	0	0	0	0	0
	0	0	0	0	0	0	0	0	0	0	0	0
	0	0	0	0	0	0	0	0	0	0	0	0
	0	0	0	0	0	0.1	0	0	0	0	0	0
	0	0	0	0	0	0	0	0	0	0	0.3	0
	0	0	0	0	0	0	0	0	0	0	0	0
	0	0	0	0	0	0	0	0	0	0	0	0
	0	0	0	0	0.1	0	0	0	0	0	0	0
	0	0	0	0	0	0	0	0	0	0	0	0
	0	0	0	0	0	0	0	0	0	0	0	0.1
	0	0	0	0	0	0	0	0	0	0	0	0
	0	0	0	0	0	0	0	0	0	0	0	0
	0	0	0	0.3	0.6	0	0	0	0	0	0	0
	0	0	0	0	0	0	0	0	0	0	0	0
	0	0	0	0	0	0	0	0	0	0	0	0
	0	0	0	0	0	0	0	0	0	0	0	0
	0	0	0	0	0	0	0	0	0	0	0	0
	0	0	0	0.1	0.3	0	0	0	0	0	0	0
	0	0	0	0	0	0	0	0	0	0	0	0
	0	0	0	0	0	0	0	0	0	0	0	0
	0	0	0	0	0	0.1	0	0	0	0	0	0
	0	0	0	0	0	0	0	0	0	0	0	0
	0	0	0	0	0	0	0	0	0	0	0	0
	0	0	0	0	0	0	0	0	0	0	0	0
	0	0.1	0	0	0	0	0	0	0	0	0	0
	0	0	0	0	0	0	0	0	0	0	0	0
	0	0	0.1	0	0	0	0	0	0	0	0	0
	0	0	0	0	0	0	0	0	0	0	0	0
	0	0	0	0	0	0	0	0	0	0	0	0
	0.3	0.6	0	0	0	0	0	0	0	0	0	0
	0	0	0.1	0	0	0	0	0	0	0	0	0
	0	0	0	0	0	0	0	0	0	0	0	0
	0	0	0	0	0	0	0	0	0	0	0	0
	0	0	0	0	0	0	0	0.1	0.1	0	0	0
	0	0	0	0	0	0	0	0	0	0	0	0
	0	0	0	0	0	0	0	0	0	0	0	0
	0	0	0	0	0	0	0	0	0	0	0	0
	0	0	0	0	0	0.1	0	0	0	0	0	0
	0	0	0	0	0	0	0.1	0.3	0	0	0	0
	0	0	0	0	0	0	0	0	0	0	0	0
	0	0	0	0	0	0	0	0	0	0	0	0
	0	0	0	0	0	0	0	0	0	0	0	0
	0	0	0	0	0	0	0	0	0	0	0	0
	0	0	0	0	0	0	0	0	0	0	0	0
	0	0	0	0	0	0	0	0	0	0	0	0
	0.3	0.6	0	0	0	0	0	0	0	0	0	0
	0	0	0	0	0	0	0	0	0	0	0	0
	0	0	0	0	0	0	0	0	0	0	0	0
	0	0	0	0	0	0	0	0	0	0	0	0
	0.4	0.5	0.1	0	0	0	0	0	0	0	0	0
	0	0	0	0	0	0	0	0	0.1	0	0	0
	0	0	0.1	0	0	0	0	0	0	0	0	0
	0	0	0	0	0	0	0	0	0	0	0	0
	0	0	0	0	0	0	0	0	0	0	0	0
	0.1	0.5	0.1	0	0	0	0	0	0	0	0	0
	0	0	0	0	0	0	0	0	0	0	0	0
	0	0	0	0	0	0	0	0	0	0	0	0
	0	0	0	0	0	0	0	0	0	0	0	0
	0	0	0	0	0	0	0	0	0	0	0	0
	0	0	0	0	0	0	0	0	0	0	0	0
	0	0	0	0	0	0	0	0	0	0	0	0
	0	0	0	0	0	0	0	0	0	0	0	0
	0	0	0.1	0	0	0	0	0	0	0	0	0
	0	0	0	0	0	0	0	0	0	0	0	0
	0	0	0	0	0	0	0	0	0	0	0	0
	0	0	0	0	0	0	0	0	0	0	0	0.1
	0	0	0	0	0	0	0	0	0	0	0	0
	0	0	0.1	0	0	0	0	0	0	0	0	0
	0	0	0	0	0	0	0	0	0	0	0	0
	0	0	0	0	0	0	0	0	0	0	0	0.1
	0	0	0	0	0	0	0	0	0.1	0	0	0
	0	0	0	0	0	0.1	0	0	0	0	0	0
	0	0	0	0	0	0	0	0	0	0	0	0
	0	0	0	0	0	0	0	0	0	0	0	0.1
	0	0	0	0	0	0	0.1	0.3	0	0	0	0
	0	0	0	0	0	0	0	0	0	0	0	0
	0	0	0	0	0	0	0	0	0	0	0	0
	0	0	0	0	0	0	0	0	0	0	0	0
	0	0	0	0	0	0	0	0	0.1	0	0	0
	0	0	0	0	0	0	0	0	0	0	0	0
	0	0	0	0	0	0	0	0	0	0	0	0
	0	0	0	0	0	0	0	0	0.1	0	0	0
	0	0	0	0	0	0	0	0	0	0	0	0
	0	0	0.1	0	0	0	0	0	0.1	0	0	0
	0	0	0	0	0	0	0	0	0	0	0	0
	0.3	0.6	0	0	0	0	0	0	0	0	0	0
	0	0	0	0	0	0	0	0	0	0	0	0
	0	0	0.1	0	0	0	0	0	0	0	0	0
	0	0	0	0	0	0	0	0	0	0	0	0
	0	0	0	0	0	0	0	0	0	0	0	0
	0	0	0	0	0	0	0	0	0	0	0	0.1
	0	0	0	0	0	0	0	0	0	0	0	0
	0	0	0	0	0	0	0	0	0	0	0	0
	0	0	0	0	0	0	0	0	0	0	0	0
	0	0	0	0	0	0	0	0	0	0	0	0
	0	0	0	0	0	0	0	0	0	0	0	0
	0	0	0	0	0	0.1	0	0	0	0	0	0
	0	0	0	0	0	0	0	0	0	0	0	0
	0	0	0	0	0	0	0	0	0	0	0	0
	0	0	0	0	0	0	0	0	0	0	0	0
	0	0	0	0	0	0	0	0	0	0	0	0
	0	0	0	0	0.1	0	0	0	0.1	0	0	0
	0	0	0.1	0	0	0	0	0.1	0	0	0	0
	0	0	0.1	0	0	0	0	0	0	0	0	0
	0	0	0	0	0	0	0	0	0	0	0	0
	0	0	0	0	0	0	0	0	0	0	0	0
	0	0	0	0	0	0	0	0	0	0	0	0
	0	0	0	0	0	0	0	0	0	0	0	0
	0	0	0	0	0	0	0	0	0	0	0	0
	0	0	0	0	0	0	0	0	0	0	0	0
	0	0	0.1	0	0	0	0	0	0	0	0	0
	0	0	0	0	0	0	0	0	0	0	0	0
	0	0	0	0	0	0	0	0	0	0	0	0
	0	0	0	0.2	0.5	0	0	0	0	0	0	0
	0	0	0	0	0	0	0	0	0	0	0	0
	0	0	0	0	0	0	0	0	0	0	0	0
	0	0	0	0	0	0	0	0	0	0	0	0
	0	0	0	0	0	0	0	0	0	0	0	0
	0	0	0	0	0	0	0	0	0	0	0	0
	0	0	0	0	0	0	0	0	0	0	0	0
	0	0	0	0	0	0.1	0	0	0	0	0	0
	0	0	0	0	0	0	0	0	0	0	0	0
	0	0	0	0	0	0	0	0	0	0	0	0
	0	0	0	0	0	0	0	0	0	0	0	0
	0	0	0	0	0	0	0	0	0	0	0	0
	0	0	0	0	0	0	0	0	0	0	0	0
	0	0	0	0	0	0	0	0	0	0	0	0
	0	0	0	0	0	0.1	0	0	0	0	0	0
	0	0	0	0	0	0	0	0	0.1	0	0	0
	0	0	0	0	0	0	0	0	0	0	0	0
	0	0	0	0	0	0	0	0	0	0	0	0
	0	0	0	0	0	0	0	0	0	0	0	0
	0	0	0	0	0	0	0	0	0	0	0	0
	0	0	0	0	0	0	0	0	0	0	0	0
	0	0	0	0	0	0	0	0	0	0	0	0
	0	0	0.1	0	0	0	0	0	0	0	0	0
	0	0	0.1	0	0	0.1	0	0	0.1	0	0	0
	0	0	0	0	0	0	0	0	0	0	0	0
	0	0	0	0	0	0	0	0	0	0	0	0
	0	0	0	0	0	0	0	0	0	0	0	0
	0	0	0	0	0	0	0	0	0	0	0	0
	0	0	0	0	0	0	0	0	0	0	0	0
	0	0	0.1	0	0	0	0	0	0	0	0	0
	0	0	0	0	0	0	0	0	0	0	0	0
	0	0	0	0	0	0	0	0	0	0	0	0
	0	0	0	0	0	0	0	0	0	0	0	0
	0	0	0	0	0	0	0	0	0	0	0	0.1
	0	0	0	0	0	0	0	0	0	0	0	0
	0	0	0	0	0	0	0	0	0	0	0	0
	0	0	0	0	0	0	0	0	0	0	0	0
	0	0	0	0	0	0	0	0	0	0	0	0
	0	0	0	0	0	0.1	0	0	0	0	0	0
	0	0	0	0	0	0	0	0	0	0	0	0
	0	0	0	0	0	0	0	0	0	0	0	0
	0	0	0	0	0	0	0	0	0	0	0	0
	0	0	0	0	0	0	0	0	0	0	0	0
	0	0	0	0	0	0.1	0	0	0	0	0	0
	0	0	0	0	0	0	0	0	0	0	0	0
	0	0	0	0	0	0	0	0	0	0	0	0
	0.1	0.3	0	0	0	0	0	0	0	0	0	0
	0	0	0	0	0	0	0	0	0.1	0	0	0
	0	0	0	0	0	0	0	0	0	0	0	0
	0	0	0.1	0	0	0	0	0.1	0	0	0	0
	0	0	0	0	0	0	0	0	0	0	0	0
	0	0	0	0	0	0	0	0	0	0	0	0
	0	0	0.1	0	0	0	0	0	0	0	0	0.1
	0	0	0	0	0	0	0	0	0	0	0	0
	0	0	0.1	0	0	0.1	0	0	0	0	0	0
	0	0	0	0	0	0	0	0	0	0	0	0
	0	0	0	0	0	0	0	0	0	0	0	0
	0	0	0	0	0	0.1	0	0	0	0	0	0.1
	0	0	0.1	0	0	0	0	0	0	0	0	0
	0	0	0	0	0	0.1	0	0	0	0	0	0
	0	0	0.1	0	0	0	0	0	0.1	0	0	0
	0	0.1	0.1	0	0	0	0	0	0	0	0	0.1
	0	0	0	0	0	0	0	0	0.1	0	0	0
	0	0	0.1	0	0	0.1	0	0	0	0	0	0
	0	0	0	0	0	0.1	0	0	0	0	0	0
	0	0	0	0	0	0.1	0	0	0	0	0	0.1
	0	0	0	0	0	0	0	0	0	0	0	0
	0	0	0	0	0	0	0	0	0	0	0	0.1
	0	0	0	0.1	0.5	0.1	0	0	0	0	0	0
	0	0	0	0	0	0.1	0	0	0	0	0	0
	0	0	0	0	0	0	0	0	0.1	0	0	0
	0	0	0	0	0	0.1	0	0	0	0	0	0
	0	0	0	0	0	0.1	0	0	0	0	0	0
	0	0	0	0	0	0	0	0	0	0	0	0
	0	0	0	0	0	0	0	0	0	0	0	0
	0	0	0	0	0	0	0	0	0	0	0	0
	0	0	0.1	0	0	0	0	0	0	0	0	0
	0	0	0	0	0	0	0	0	0	0	0	0.1
	0	0	0	0	0	0.1	0	0	0	0	0	0
	0	0	0	0	0	0	0	0	0	0	0	0
	0	0	0	0	0	0.1	0	0	0	0	0	0
	0	0	0.1	0	0	0.1	0	0	0	0	0	0
	0	0	0	0	0	0	0	0	0	0	0	0
	0	0	0.1	0	0	0	0	0	0	0	0	0.1
	0	0	0	0	0	0	0	0	0	0	0	0
	0	0	0	0	0	0.1	0	0	0	0	0	0
	0	0	0	0	0	0	0	0	0.1	0	0	0.1
	0	0	0	0	0	0	0	0	0	0	0	0
	0	0	0	0	0	0	0	0	0.1	0	0	0
	0	0	0	0	0	0	0	0	0	0	0	0
	0	0	0	0	0	0.1	0	0	0	0	0	0
	0	0	0	0	0	0	0	0	0	0	0	0
	0	0	0	0	0	0	0	0	0	0	0	0
	0	0	0	0	0	0	0	0	0	0	0	0
	0	0	0	0	0	0	0	0	0	0	0	0
	0	0	0	0	0	0.1	0	0	0	0	0	0
	0	0	0	0	0	0	0	0	0.1	0	0	0
	0	0	0	0	0	0	0	0	0	0	0	0
	0	0	0	0	0	0.1	0	0	0	0	0	0
	0	0	0	0	0	0	0	0	0	0	0	0
	0	0	0	0	0	0	0	0	0	0	0	0.1
	0	0	0.1	0	0	0.1	0	0	0	0	0	0
	0	0	0	0	0	0	0	0	0	0	0	0
	0	0	0.1	0	0	0.1	0	0	0	0	0	0
	0	0	0	0	0	0	0	0	0	0	0	0
	0	0	0	0	0	0.1	0	0	0	0	0	0.1
	0	0	0	0	0	0.1	0	0	0	0	0	0
	0	0	0	0	0	0	0	0	0	0	0	0
	0	0	0	0	0	0	0	0	0	0	0	0
	0	0	0	0	0	0.1	0	0	0	0	0	0
	0	0	0	0	0	0	0	0	0	0	0	0
	0	0	0	0	0	0	0	0.1	0.1	0	0	0
	0	0	0	0	0	0	0	0	0.1	0	0	0
	0	0	0	0	0	0.1	0	0	0	0	0	0
	0	0	0	0	0	0	0	0.1	0	0	0	0
	0	0	0	0	0	0	0	0	0.1	0	0	0
	0	0	0	0	0	0	0	0	0	0	0	0
	0	0	0	0	0	0	0	0	0.1	0	0	0
	0	0	0	0	0	0.1	0	0	0	0	0	0
	0	0	0	0	0	0.1	0	0	0	0	0	0
	0	0	0.1	0	0	0	0	0	0	0	0	0
	0	0	0.1	0	0	0.1	0	0	0	0	0	0
	0	0	0	0	0	0	0	0	0	0	0	0
	0	0	0.1	0	0	0.1	0	0	0	0	0	0
	0	0	0	0	0	0	0	0	0	0	0	0
	0	0	0	0	0	0.1	0	0	0	0	0	0
	0	0	0	0	0	0	0	0	0	0	0	0
	0	0	0	0	0	0	0	0	0	0	0	0
	0	0	0	0	0	0.1	0	0	0	0	0	0
	0	0	0.1	0	0	0	0	0	0	0	0	0
	0	0	0	0	0	0	0	0.1	0	0	0	0
	0	0	0	0	0	0.1	0	0	0	0	0	0
	0	0	0	0	0	0.1	0	0	0	0	0	0
	0	0.3	0.1	0	0	0	0	0	0	0	0	0
	0	0	0	0	0	0.1	0	0	0.1	0	0	0
	0	0	0	0	0	0	0	0	0.1	0	0	0
	0	0	0	0	0	0.1	0	0	0	0	0	0
	0	0	0	0	0	0.1	0	0	0	0	0	0
	0	0	0	0	0	0	0	0	0	0	0	0
	0	0	0.1	0	0	0.1	0	0	0	0	0	0
	0	0	0.1	0	0	0.1	0	0	0	0	0	0
	0	0	0	0	0	0	0	0	0	0	0	0
	0	0	0	0	0	0.1	0	0	0	0	0	0
	0	0	0	0	0	0	0	0	0	0	0	0
	0	0	0	0	0	0.1	0	0	0	0	0	0
	0	0	0	0	0	0.1	0	0	0	0	0	0
	0	0	0	0	0	0.1	0	0	0.1	0	0	0
	0	0	0	0	0	0.1	0	0	0	0	0	0
	0	0	0.1	0	0	0	0	0	0	0	0	0
	0	0	0	0	0	0.1	0	0	0	0	0	0
	0	0	0	0	0	0	0	0	0	0	0	0
	0	0	0	0	0	0.1	0	0	0	0	0	0
	0	0	0	0	0	0.1	0	0	0.1	0	0	0
	0	0	0	0	0	0.1	0	0	0	0	0	0
	0	0	0	0	0	0.1	0	0	0	0	0	0
	0	0	0	0	0	0.1	0	0	0	0	0	0
	0	0	0	0	0	0.1	0.1	0.3	0	0	0	0
	0	0	0.1	0	0	0	0	0	0	0	0	0
	0	0	0.1	0	0	0.1	0	0	0	0	0	0
	0	0	0.1	0	0	0.1	0	0	0	0	0	0
	0	0	0	0	0	0	0	0	0	0	0	0
	0	0.1	0.1	0	0	0.1	0	0	0	0	0	0
	0	0	0	0	0	0.1	0	0	0	0	0	0
	0	0	0	0	0	0	0	0	0	0	0	0
	0	0	0	0	0	0	0	0	0	0	0	0
	0	0	0	0.1	0.5	0.1	0	0	0	0	0	0
	0	0	0.1	0	0	0.1	0	0	0	0	0	0
	0	0	0	0	0	0	0	0	0	0	0	0
	0	0	0	0	0	0	0	0	0	0	0	0
	0	0	0	0	0	0.1	0	0	0	0	0	0
	0	0	0	0	0	0.1	0	0	0	0	0	0
	0	0	0	0	0	0	0	0	0	0	0	0
	0	0	0	0	0	0	0	0	0	0	0	0
	0	0	0.1	0	0	0.1	0	0	0	0	0	0
	0	0	0	0	0	0.1	0	0	0	0	0	0
	0	0	0	0	0	0.1	0	0	0	0	0	0
	0	0	0.1	0	0	0	0	0	0	0	0	0.1
	0	0	0	0	0	0.1	0	0	0.1	0	0	0
	0	0	0	0	0	0.1	0	0	0	0	0	0
	0	0	0	0	0	0.1	0	0	0	0	0	0
	0	0	0	0	0	0	0	0	0	0	0	0
	0	0	0	0	0	0.1	0	0	0.1	0	0	0
	0	0	0	0	0	0	0	0	0	0	0	0
	0	0	0	0	0	0	0	0	0	0	0	0
	0	0	0	0	0	0.1	0	0	0	0	0	0
	0	0	0	0	0	0	0	0	0	0	0	0
	0	0	0.1	0	0	0.1	0	0	0.1	0	0	0
	0	0	0.1	0	0	0.1	0	0	0	0	0	0
	0	0	0	0	0.1	0.1	0	0	0.1	0	0	0
	0	0	0	0	0	0.1	0	0	0	0	0	0.1
	0	0	0	0	0	0.1	0	0	0	0	0	0
	0	0	0.1	0	0	0	0	0	0	0	0	0.1
	0	0	0	0	0	0.1	0	0	0	0	0	0
	0	0	0	0	0	0.1	0	0	0.1	0	0	0
	0	0	0.1	0	0	0	0	0	0	0	0	0
	0	0	0	0	0	0.1	0	0	0	0	0	0
	0	0	0	0	0	0.1	0	0	0	0	0	0
	0	0	0	0	0	0.1	0	0	0	0	0	0
	0	0	0	0	0	0	0	0	0.1	0	0	0
	0	0	0.1	0	0	0	0	0	0	0	0	0
	0	0	0	0	0	0	0	0	0	0	0	0
	0	0	0.1	0	0	0.1	0	0	0.1	0	0	0
	0	0	0	0	0	0.1	0	0	0	0	0	0
	0	0	0	0	0	0.1	0	0	0	0	0	0
	0	0	0	0	0	0	0	0	0	0	0	0
	0	0	0	0	0	0.1	0	0	0	0	0	0.1
	0	0	0.1	0	0	0	0	0	0	0	0	0
	0	0	0	0	0	0	0	0	0.1	0	0	0
	0	0	0	0	0	0.1	0	0	0.1	0	0	0
	0	0	0	0	0	0.1	0	0	0	0	0	0
	0	0	0	0	0	0.1	0	0	0	0	0	0
	0	0	0	0	0	0	0	0	0	0	0	0.1
	0	0	0	0	0	0	0	0	0.1	0	0	0
	0	0	0	0	0	0.1	0	0	0	0	0	0
	0	0	0.1	0	0	0.1	0	0	0	0	0	0
	0	0	0	0	0	0	0	0	0	0	0	0.1
	0	0	0	0	0	0.1	0	0	0	0	0	0
	0	0	0	0	0	0	0	0	0	0	0	0
	0	0	0	0	0	0	0	0	0.1	0	0	0.1
	0	0	0	0	0	0.1	0	0	0	0	0	0
	0	0	0	0	0	0.1	0	0	0	0	0	0
	0	0	0.1	0	0	0.1	0	0	0.1	0	0	0
	0	0	0	0	0	0.1	0	0	0	0	0	0
	0	0	0	0	0	0.1	0	0	0	0	0	0
	0	0	0	0	0	0.1	0	0	0	0	0	0
	0	0	0	0	0	0	0	0	0	0	0	0.1
	0	0	0	0	0	0.1	0	0	0	0	0	0.1
	0	0	0	0	0	0	0	0	0	0	0	0
	0	0	0	0	0	0	0	0	0	0	0	0.1
	0	0	0.1	0	0	0.1	0	0	0	0	0	0.1
	0	0	0	0	0	0	0	0	0.1	0	0	0
	0	0	0.1	0	0	0.1	0	0	0.1	0	0	0
	0	0	0	0	0	0.1	0	0	0	0	0	0.1
	0	0	0	0	0	0.1	0	0	0	0	0	0
	0	0	0	0	0	0.1	0	0	0	0	0	0
	0	0	0	0	0	0.1	0	0	0	0	0	0
	0	0	0	0	0	0	0	0	0	0	0	0
	0	0	0.1	0	0	0.1	0	0	0	0	0	0.1
	0	0	0.1	0	0	0.1	0	0	0	0	0	0
	0	0	0	0	0	0.1	0	0	0	0	0	0.1
	0	0	0	0	0	0	0	0	0	0	0	0.1
	0	0	0	0	0	0.1	0	0	0.1	0	0	0
	0	0	0.1	0	0	0.1	0	0	0.1	0	0	0
	0	0	0	0	0	0.1	0	0	0	0	0	0.1
	0	0	0	0	0	0	0	0	0	0	0	0.1
	0	0	0	0	0	0.1	0	0	0	0	0	0
	0	0	0	0	0	0.1	0	0	0	0	0	0.1
	0	0	0	0	0	0	0	0	0	0	0	0
	0	0	0	0	0	0.1	0	0	0	0	0	0.1
	0	0	0	0	0	0.1	0	0	0	0	0	0
	0	0	0	0	0	0.1	0	0	0	0	0	0
	0	0	0.1	0	0	0.1	0	0	0	0	0	0
	0	0	0	0	0	0	0	0	0	0	0	0
	0	0.1	0	0	0	0.1	0	0	0	0	0	0
	0	0	0	0	0	0	0	0	0	0	0	0
	0	0	0.1	0	0	0.1	0	0	0	0	0	0
	0	0	0	0	0	0	0	0	0	0	0	0
	0	0	0.1	0	0	0.1	0	0	0	0	0	0
	0	0	0.1	0	0	0.1	0	0	0	0	0	0
	0	0	0	0	0	0.1	0	0	0	0	0	0.1
	0	0	0	0	0	0	0	0	0	0.1	0.3	0
	0	0	0.1	0	0	0.1	0	0	0	0	0	0
	0	0	0	0	0	0	0	0	0	0	0	0
	0	0	0	0	0	0.1	0	0	0	0	0	0
	0	0	0	0	0	0.1	0	0	0.1	0	0	0
	0	0	0	0	0	0.1	0	0	0	0	0	0
	0	0	0	0	0	0.1	0	0	0	0	0	0
	0	0	0	0	0	0	0	0	0	0	0	0
	0	0	0.1	0	0	0.1	0	0	0	0.3	0.6	0
	0	0	0	0	0	0.1	0	0	0	0	0	0
	0	0	0.1	0	0	0.1	0	0	0	0	0	0
	0	0	0	0	0	0.1	0	0	0	0	0	0.1
	0	0	0	0	0	0.1	0	0	0	0	0	0.1
	0	0	0	0	0	0	0	0	0	0	0	0
	0	0	0	0	0	0.1	0	0	0	0	0	0
	0	0	0	0	0	0.1	0	0	0	0	0	0
	0	0	0.1	0	0	0.1	0	0	0	0	0	0
	0	0	0.1	0	0	0	0	0	0	0	0.1	0.1
	0	0	0.1	0	0	0.1	0	0	0	0	0	0.1
	0	0	0	0	0	0.1	0	0	0.1	0	0	0
	0	0	0.1	0	0	0.1	0	0	0	0	0	0
	0	0	0	0	0	0.1	0	0	0	0	0	0
	0	0	0	0	0	0.1	0	0	0	0	0	0.1
	0	0	0.1	0	0	0	0	0	0	0	0	0
	0	0	0.1	0	0	0	0	0	0	0	0	0
	0	0	0.1	0	0	0	0	0	0	0	0	0
	0	0	0.1	0	0	0	0	0	0	0	0	0
	0	0	0	0	0	0.1	0	0	0	0	0	0
	0	0	0	0	0	0.1	0	0	0	0	0	0
	0	0	0	0	0	0.1	0	0	0	0	0	0
	0	0	0	0	0	0.1	0	0	0.1	0	0	0
	0	0	0.1	0	0	0.1	0	0.1	0	0	0	0
	0	0	0	0	0	0	0	0	0	0	0	0
	0	0	0	0	0	0	0	0	0	0	0	0
	0	0	0.1	0	0	0.1	0	0	0	0	0	0.1
	0	0	0	0	0	0	0	0	0	0	0	0.1
	0	0	0.1	0	0	0	0	0	0	0	0	0.1
	0	0	0	0	0	0.1	0	0	0	0	0	0
	0	0	0.1	0	0	0.1	0	0	0	0	0	0
	0	0	0.1	0	0	0	0	0	0	0	0	0
	0	0	0.1	0	0	0.1	0	0	0	0	0	0
	0	0	0.1	0	0	0.1	0	0	0	0	0	0
	0	0	0.1	0	0	0.1	0	0	0	0	0	0
	0	0	0	0	0	0.1	0	0	0	0	0	0
	0	0	0.1	0	0	0.1	0	0	0	0	0	0
	0	0	0	0	0	0	0	0	0.1	0	0	0
	0	0	0.1	0	0	0.1	0	0	0.1	0	0	0
	0	0	0.1	0	0	0.1	0	0	0.1	0	0	0
	0	0	0.1	0	0	0.1	0	0	0.1	0	0	0
	0	0	0	0	0	0.1	0	0	0	0	0	0
	0	0	0.1	0	0	0	0	0	0	0	0	0
	0	0	0.1	0	0	0.1	0.1	0.2	0.1	0	0.1	0
	0	0	0.1	0	0	0.1	0	0	0	0	0	0
	0	0	0.1	0	0	0.1	0	0	0	0	0	0
	0	0	0	0	0	0.1	0	0	0	0	0	0
	0	0	0.1	0	0	0	0	0	0	0	0	0
	0	0	0.1	0	0	0.1	0	0	0.1	0	0	0.1
	0	0	0	0	0	0.1	0	0	0	0	0	0
	0	0	0.1	0	0	0	0	0	0	0	0	0
	0	0	0	0	0	0	0	0	0	0	0	0.1
	0	0	0.1	0	0	0	0	0	0	0	0	0.1
	0	0	0	0	0	0	0	0	0	0	0	0
	0	0	0	0	0	0.1	0	0	0	0	0	0
	0	0	0	0	0	0	0	0	0	0	0	0
	0	0	0	0	0	0.1	0	0	0.1	0	0	0.1
	0	0	0	0	0	0	0	0	0.1	0	0	0
	0	0	0	0	0	0.1	0	0	0.1	0	0	0.1
	0	0	0.1	0	0	0.1	0	0	0	0	0	0
	0	0	0	0	0	0.1	0	0	0	0	0	0
	0	0	0	0	0	0.1	0	0	0	0	0	0.1
	0	0	0	0	0	0	0	0	0	0	0	0
	0	0	0	0	0	0.1	0	0	0	0	0	0.1
	0	0	0	0	0	0.1	0	0	0	0	0	0
	0	0	0.1	0	0	0.1	0	0	0	0	0	0
	0	0	0.1	0	0	0.1	0	0	0	0	0	0
	0	0	0.1	0	0	0.1	0	0	0	0	0	0
	0	0	0	0	0	0.1	0	0	0	0	0	0
	0	0	0.1	0	0	0.1	0	0	0	0	0	0
	0	0	0.1	0	0	0.1	0	0	0	0	0	0
	0	0	0.1	0	0	0	0	0	0	0	0	0
	0	0	0.1	0	0	0.1	0	0	0.1	0	0	0
	0	0	0	0	0	0.1	0	0	0	0	0	0
	0	0	0.1	0	0	0.1	0	0	0	0	0	0
	0	0	0	0	0	0	0	0	0	0	0	0
	0	0	0.1	0	0	0.1	0	0	0	0	0	0
	0	0	0.1	0	0	0.1	0	0	0	0	0	0.1
	0	0	0	0	0	0.1	0	0	0.1	0	0	0.1
	0	0	0	0	0	0.1	0	0	0	0	0	0
	0	0	0	0	0	0.1	0	0	0	0	0	0.1
	0	0	0	0	0	0.1	0	0	0	0	0	0
	0	0	0	0	0	0	0	0	0	0	0	0
	0	0	0	0	0	0.1	0	0	0	0	0	0
	0	0	0	0	0	0.1	0	0	0	0	0	0
	0	0	0.1	0	0	0.1	0	0	0	0	0	0
	0	0	0	0	0	0.1	0	0	0	0	0	0
	0	0	0	0	0	0	0	0	0	0	0	0
	0	0	0.1	0	0	0.1	0	0	0	0	0	0
	0	0	0	0	0	0.1	0	0	0	0	0	0
	0	0	0	0	0	0.1	0	0	0	0	0	0.1
	0	0	0	0	0	0.1	0	0	0	0	0	0
	0	0	0.1	0	0	0.1	0	0	0.1	0	0	0
	0	0	0	0	0	0.1	0	0	0	0	0	0
	0	0	0.1	0	0	0.1	0	0	0	0	0	0
	0	0	0.1	0	0	0.1	0	0	0.1	0	0	0
	0	0	0	0	0	0.1	0	0	0	0	0	0
	0	0	0	0	0	0.1	0	0	0	0	0	0.1
	0	0	0	0	0	0.1	0	0	0.1	0	0	0
	0	0	0	0	0	0.1	0	0	0	0	0	0
	0	0	0.1	0	0	0.1	0	0	0	0	0	0
	0	0	0.1	0	0	0	0	0	0	0	0	0
	0	0	0.1	0	0	0.1	0	0	0	0	0	0
	0	0	0	0	0	0.1	0	0	0	0	0	0.1
	0	0	0.1	0	0	0.1	0	0	0	0	0	0.1
	0	0	0.1	0	0	0.1	0	0	0	0	0	0
	0	0	0	0	0	0	0	0	0	0	0	0.1
	0	0	0.1	0	0	0.1	0	0	0	0	0	0.1
	0	0	0	0	0	0.1	0	0	0	0	0	0
	0	0	0	0	0	0	0	0	0	0	0	0
	0	0	0	0	0	0.1	0	0	0	0	0	0
	0	0	0.1	0	0	0.1	0	0	0	0	0	0
	0	0	0	0	0	0.1	0	0	0	0	0	0
	0	0	0	0	0	0.1	0	0	0	0	0	0
	0	0	0.1	0	0	0.1	0	0	0	0	0	0
	0	0	0	0	0	0.1	0	0	0	0	0	0.1
	0	0	0.1	0	0	0	0	0	0	0	0	0
	0	0	0	0	0	0	0	0	0	0	0	0
	0	0	0	0	0	0.1	0	0	0	0	0	0
	0	0	0	0	0	0.1	0	0	0	0	0	0
	0	0	0.1	0	0	0.1	0	0	0	0	0	0
	0	0	0	0	0	0.1	0	0	0.1	0	0	0
	0	0	0.1	0	0	0.1	0	0	0	0	0	0
	0	0.1	0.1	0	0	0.1	0	0	0	0	0	0
	0	0	0	0	0	0.1	0	0	0.1	0	0	0
	0	0	0.1	0	0	0.1	0	0	0	0	0	0
	0	0	0.1	0	0	0.1	0	0	0	0	0	0
	0	0	0	0	0	0.1	0	0	0	0	0	0.1
	0	0	0.1	0	0	0.1	0	0	0	0	0	0
	0	0	0.1	0	0	0.1	0	0	0	0	0	0
	0	0	0.1	0	0	0.1	0	0	0	0	0	0
	0	0	0	0	0	0.1	0	0	0	0	0	0
	0	0	0.1	0	0	0.1	0	0	0	0	0	0
	0	0	0.1	0	0	0.1	0	0	0	0	0	0
	0	0	0	0	0	0	0	0	0	0	0	0
	0	0	0	0	0	0.1	0	0	0	0	0	0
	0	0	0.1	0	0	0.1	0	0	0	0	0	0
	0	0	0	0	0	0.1	0	0	0	0	0	0
	0	0	0.1	0	0	0.1	0	0	0	0	0	0
	0	0	0.1	0	0	0.1	0	0	0	0	0	0
	0	0	0.1	0	0	0.1	0	0	0	0	0	0
	0	0	0.1	0	0	0.1	0	0	0	0	0	0
	0	0	0	0	0	0.2	0	0	0	0	0	0
	0	0	0.1	0	0	0.1	0	0	0	0	0	0
	0	0	0	0	0	0.1	0	0	0	0	0	0
	0	0	0.1	0	0	0	0	0	0	0	0	0
	0	0	0	0	0	0.1	0	0	0	0	0	0
	0	0	0	0	0	0.1	0	0	0	0	0	0
	0	0	0.1	0	0	0	0	0	0	0	0	0
	0	0	0	0	0	0.1	0	0	0	0	0	0
	0	0	0.1	0	0	0.1	0	0	0	0	0	0
	0	0	0	0	0	0.1	0	0	0.1	0	0	0
	0	0	0.1	0	0	0.1	0	0	0	0	0	0
	0	0	0.1	0	0	0.1	0	0	0	0	0	0
	0	0	0	0	0	0.1	0	0	0.1	0	0	0
	0	0	0	0	0	0.1	0	0	0	0	0	0
	0	0	0.1	0	0	0.1	0	0	0	0	0	0
	0	0	0.1	0	0	0.1	0	0	0	0	0	0.1
	0	0	0	0	0	0.1	0	0	0	0	0	0
	0	0	0.1	0	0	0.1	0	0	0	0	0	0
	0	0	0	0	0	0.1	0	0	0.1	0	0	0.1
	0	0	0	0	0	0	0	0	0	0	0	0
	0	0	0	0	0	0	0	0	0	0	0	0
	0	0	0	0	0	0.1	0	0	0	0	0	0
	0	0	0	0	0	0.1	0	0	0	0	0	0
	0	0	0.1	0	0	0.1	0	0	0	0	0	0
	0	0	0	0	0	0.1	0	0	0	0	0	0
	0	0	0	0	0	0.1	0	0	0	0	0	0
	0	0	0	0	0	0	0	0	0	0	0	0
	0	0	0	0	0	0.1	0	0	0	0	0	0.1
	0	0	0	0	0	0.1	0	0	0.1	0	0	0
	0	0	0	0	0	0.1	0	0	0.1	0	0	0.1
	0	0	0	0	0	0	0	0	0	0	0	0
	0	0	0.1	0	0	0.1	0	0	0	0	0	0.1
	0	0	0	0	0	0.1	0	0	0.1	0	0	0.1
	0	0	0.1	0	0	0.1	0	0	0	0	0	0
	0	0	0.1	0	0	0.1	0	0	0.1	0	0	0.1
	0	0	0.1	0	0	0.1	0	0	0	0	0	0
	0	0	0	0	0	0.1	0	0	0	0	0	0
	0	0	0.1	0	0	0.1	0	0	0	0	0	0
	0	0	0	0	0	0.1	0	0	0	0	0	0
	0	0	0	0	0	0.1	0	0	0	0	0	0
	0	0	0.1	0	0	0	0	0	0	0	0	0
	0	0	0	0	0	0	0	0	0	0	0	0
	0	0	0.1	0	0	0.1	0	0	0	0	0	0.1
	0	0	0.1	0	0	0.1	0	0	0	0	0	0
	0	0.1	0.1	0	0	0	0	0	0	0	0	0
	0	0	0.1	0	0	0.1	0	0	0	0	0	0
	0	0	0	0	0	0.1	0	0	0	0	0	0.1
	0	0	0.1	0	0	0.1	0	0	0	0	0	0
	0	0	0.1	0	0	0.1	0	0	0.1	0	0	0
	0	0	0	0	0	0.1	0	0	0.1	0	0	0
	0	0	0.1	0	0	0	0	0	0	0	0	0.1
	0	0	0	0	0	0	0	0	0.1	0	0	0
	0	0	0	0	0	0.1	0	0	0	0	0	0
	0	0	0	0	0	0.1	0	0	0	0	0	0
	0	0	0	0	0	0.1	0	0	0	0	0	0.1
	0	0	0.1	0	0	0.1	0	0	0.1	0	0	0.1
	0	0	0.1	0	0	0.1	0	0	0	0	0	0
	0	0	0.1	0	0	0.1	0	0	0.1	0	0	0
	0	0	0	0	0	0.1	0	0	0	0	0	0
	0	0	0.1	0	0	0	0	0	0	0	0	0
	0	0	0	0	0	0.1	0	0	0	0	0	0
	0	0	0	0	0	0.1	0	0	0	0	0	0
	0	0	0.1	0	0	0.1	0	0	0	0	0	0
	0	0	0	0	0	0.1	0	0	0.1	0	0	0
	0	0	0	0	0	0.1	0	0	0	0	0	0
	0	0	0	0	0	0.1	0	0	0	0	0	0.1
	0	0	0	0	0	0.1	0	0	0	0	0	0
	0	0	0.1	0	0	0.1	0	0	0	0	0	0.1
	0	0	0	0	0	0.1	0	0	0	0	0	0
	0	0	0.1	0	0	0.1	0	0	0	0	0	0
	0	0	0.1	0	0	0.1	0	0	0.1	0	0	0.1
	0	0	0	0	0	0.1	0	0	0	0	0	0
	0	0	0	0	0	0.1	0	0	0	0	0	0.1
	0	0	0.1	0	0	0.1	0	0	0.1	0	0	0
	0	0	0.1	0	0	0.1	0	0	0.1	0	0.1	0.1
	0	0	0.1	0	0	0.1	0	0	0.1	0	0	0
	0	0	0	0	0	0.1	0	0	0	0	0	0
	0	0	0	0	0.1	0.1	0	0	0	0	0	0
	0	0	0.1	0	0	0.1	0	0	0	0	0	0
	0	0	0	0	0	0.1	0	0	0	0	0	0
	0	0	0.1	0	0	0.1	0	0	0.1	0	0	0
	0	0	0.1	0	0	0	0	0	0	0	0	0.1
	0	0	0	0	0	0.1	0	0	0	0	0	0
	0	0	0.1	0	0	0.1	0	0	0	0	0	0.1
	0	0	0	0	0	0.1	0	0	0	0	0	0
	0	0	0.1	0	0	0.1	0	0	0	0	0	0
	0	0	0.1	0	0	0.1	0	0	0	0	0	0
	0	0	0	0	0	0.1	0	0	0	0	0	0
	0	0	0	0	0	0.1	0	0	0	0	0	0
	0	0	0	0	0	0.1	0	0	0.1	0	0	0
	0	0	0.1	0	0	0.1	0	0	0	0	0	0
	0	0	0.1	0	0	0.1	0	0	0	0	0	0
	0	0	0	0	0	0.1	0	0	0	0	0	0
	0	0	0.1	0	0	0.1	0	0	0.1	0	0.2	0.1
	0	0	0	0	0	0.1	0	0	0	0	0	0
	0	0	0.1	0	0	0.1	0	0	0.1	0	0	0
	0	0	0.1	0	0	0.1	0	0	0	0	0	0
	0	0	0	0	0	0.1	0	0	0	0	0	0.1
	0	0	0.1	0	0	0.1	0	0	0	0	0	0
	0	0	0.1	0	0	0	0	0	0	0	0	0
	0	0	0	0	0	0.1	0	0	0	0	0	0
	0	0	0	0	0	0.1	0	0	0	0	0	0
	0	0	0	0	0	0	0	0	0	0	0	0
	0	0	0.1	0	0	0.1	0	0	0	0	0	0
	0	0	0.1	0	0	0	0	0	0	0	0	0
	0	0	0	0	0	0	0	0	0	0	0	0
[truncated: 747 more rows]

## Sheet: conifer Blank
ug/m^3	4ms	1/8
PM	10	2.5	1	10	2.5	1	10	2.5	1	10	2.5	1		Total	PM10	1546
	0	0	0	0	0	0	0	0	0	0	0	0		4.7	53.4	69.9	9.4
	0	0	0	0	0	0	0	0	0	0.1	0.1	0.1
	0	0	0	0	0	0	0.9	0.6	0	0	0	0		34.35	16.146
	0	0	0	0	0	0	0	0	0	0	0	0
	0	0	0	0	0	0	0	0	0	0	0	0
	0	0	0	0	0	0	0	0	0	0	0	0
	0	0	0	0	0	0	0	0	0	0	0	0
	0	0	0	0	0	0	0.1	0.1	0.1	0	0	0
	0	0	0	0	0	0	0	0	0	0	0	0
	0	0	0	0	0	0	0	0	0	0	0	0
	0	0	0	0.1	0.1	0.1	0	0	0	0	0	0
	0	0	0	0.1	0.1	0.1	0	0	0	0	0	0
	0	0	0	0	0	0	0	0	0	0	0	0
	0	0	0	0.1	0.1	0.1	0.2	0.2	0	0	0	0
	0	0	0	0	0	0	0.1	0.1	0.1	0	0	0
	0	0	0	0	0	0	0.1	0.1	0.1	0	0	0
	0	0	0	0	0	0	0	0	0	0.1	0.1	0.1
	0	0	0	0	0	0	0	0	0	0	0	0
	0	0	0	0	0	0	0.1	0.1	0.1	0	0	0
	0	0	0	0	0	0	0	0	0	0	0	0
	0	0	0	0	0	0	0	0	0	0	0	0
	0	0	0	0.1	0.1	0.1	0	0	0	0	0	0
	0	0	0	0	0	0	0	0	0	0.1	0.1	0.1
	0	0	0	0	0	0	0	0	0	0.1	0.1	0.1
	0	0	0	0	0	0	0	0	0	0	0	0
	0	0	0	0	0	0	0	0	0	0	0	0
	0	0	0	0	0	0	0	0	0	0.1	0.1	0.1
	0	0	0	0	0	0	0	0	0	0	0	0
	0	0	0	0	0	0	0	0	0	0.1	0.1	0.1
	0	0	0	0	0	0	0	0	0	0	0	0
	0	0	0	0	0	0	0	0	0	0	0	0
	0	0	0	0	0	0	0	0	0	0	0	0
	0	0	0	0	0	0	0	0	0	0	0	0
	0	0	0	0	0	0	0	0	0	0	0	0
	0	0	0	0	0	0	0	0	0	0	0	0
	0	0	0	0	0	0	0	0	0	0	0	0
	0	0	0	0	0	0	0	0	0	0	0	0
	0	0	0	0	0	0	0.1	0.1	0.1	0	0	0
	0	0	0	0	0	0	0	0	0	0	0	0
	0	0	0	0	0	0	0	0	0	0.1	0.1	0.1
	0	0	0	0	0	0	0	0	0	0	0	0
	0	0	0	0	0	0	0	0	0	0	0	0
	0	0	0	0	0	0	0	0	0	0	0	0
	0	0	0	0.1	0.1	0.1	0	0	0	0	0	0
	0	0	0	0	0	0	0	0	0	0	0	0
	0	0	0	0	0	0	0	0	0	0	0	0
	0	0	0	0	0	0	0	0	0	0	0	0
	0	0	0	0	0	0	0	0	0	0	0	0
	0	0	0	0	0	0	0	0	0	0	0	0
	0	0	0	0	0	0	0	0	0	0.1	0.1	0.1
	0	0	0	0.1	0.1	0.1	0	0	0	0	0	0
	0	0	0	0	0	0	0	0	0	0	0	0
	0	0	0	0.1	0.1	0.1	0	0	0	0	0	0
	0	0	0	0	0	0	0	0	0	0	0	0
	0	0	0	0	0	0	0.1	0.1	0.1	0	0	0
	0	0	0	0	0	0	0	0	0	0	0	0
	0.4	0.3	0	0	0	0	0	0	0	0.1	0.1	0.1
	0	0	0	0	0	0	0	0	0	0	0	0
	0	0	0	0	0	0	0	0	0	0	0	0
	0	0	0	0	0	0	0	0	0	0	0	0
	0	0	0	0	0	0	0	0	0	0	0	0
	0	0	0	0	0	0	0	0	0	0	0	0
	0	0	0	0	0	0	0	0	0	0	0	0
	0	0	0	0	0	0	0	0	0	0	0	0
	0	0	0	0	0	0	0	0	0	0	0	0
	0	0	0	0	0	0	0.1	0.1	0.1	0	0	0
	0	0	0	0	0	0	0	0	0	0	0	0
	0	0	0	0	0	0	0	0	0	0	0	0
	0	0	0	0	0	0	0	0	0	0.1	0.1	0.1
	0	0	0	0	0	0	0	0	0	0	0	0
	0	0	0	0	0	0	0	0	0	0	0	0
	0	0	0	0	0	0	0	0	0	0	0	0
	0	0	0	0	0	0	0	0	0	0	0	0
	0	0	0	0	0	0	0	0	0	0	0	0
	0	0	0	0.1	0.1	0.1	0	0	0	0	0	0
	0	0	0	0	0	0	0	0	0	0	0	0
	0	0	0	0	0	0	0	0	0	0	0	0
	0	0	0	0	0	0	0	0	0	0	0	0
	0	0	0	0	0	0	0	0	0	0	0	0
	0	0	0	0	0	0	0	0	0	0	0	0
	0	0	0	0	0	0	0	0	0	0	0	0
	0	0	0	0	0	0	0	0	0	0	0	0
	0	0	0	0	0	0	0	0	0	0	0	0
	0	0	0	0	0	0	0	0	0	0.1	0.1	0.1
	0	0	0	0	0	0	0	0	0	0.1	0.1	0.1
	0	0	0	0	0	0	0	0	0	0	0	0
	0	0	0	0	0	0	0	0	0	0	0	0
	0	0	0	0	0	0	0	0	0	0	0	0
	0	0	0	0	0	0	0	0	0	0	0	0
	0	0	0	0	0	0	0.1	0.1	0.1	0.1	0.1	0.1
	0	0	0	0	0	0	0	0	0	0	0	0
	0	0	0	0	0	0	0	0	0	0	0	0
	0	0	0	0	0	0	0	0	0	0	0	0
	0	0	0	0	0	0	0	0	0	0	0	0
	0	0	0	0	0	0	0	0	0	0	0	0
	0	0	0	0	0	0	0	0	0	0	0	0
	0	0	0	0	0	0	0	0	0	0	0	0
	0	0	0	0	0	0	0	0	0	0	0	0
	0	0	0	0	0	0	0	0	0	0	0	0
	0	0	0	0.1	0.1	0.1	0	0	0	0	0	0
	0	0	0	0	0	0	0	0	0	0	0	0
	0	0	0	0	0	0	0	0	0	0	0	0
	0	0	0	0	0	0	0	0	0	0	0	0
	0	0	0	0	0	0	0	0	0	0	0	0
	0.1	0.1	0.1	0	0	0	0	0	0	0	0	0
	0	0	0	0	0	0	0	0	0	0	0	0
	0.1	0.1	0.1	0	0	0	0	0	0	0	0	0
	0	0	0	0	0	0	0.1	0.1	0.1	0.1	0.1	0.1
	0	0	0	0	0	0	0	0	0	0	0	0
	0	0	0	0	0	0	0	0	0	0	0	0
	0	0	0	0	0	0	0	0	0	0.1	0.1	0.1
	0	0	0	0	0	0	0	0	0	0	0	0
	0	0	0	0	0	0	0	0	0	0	0	0
	0	0	0	0	0	0	0	0	0	0	0	0
	0	0	0	0	0	0	0	0	0	0	0	0
	0	0	0	0	0	0	0	0	0	0	0	0
	0	0	0	0	0	0	0	0	0	0.1	0.1	0.1
	0	0	0	0.1	0.1	0.1	0	0	0	0	0	0
	0	0	0	0	0	0	0.1	0.1	0.1	0	0	0
	0	0	0	0	0	0	0	0	0	0	0	0
	0	0	0	0.1	0.1	0.1	0	0	0	0	0	0
	0	0	0	0	0	0	0	0	0	0	0	0
	0	0	0	0	0	0	0	0	0	0	0	0
	0	0	0	0	0	0	0	0	0	0	0	0
	0	0	0	0.1	0.1	0.1	0	0	0	0	0	0
	0	0	0	0.1	0.1	0.1	0.1	0.1	0.1	0	0	0
	0	0	0	0	0	0	0	0	0	0	0	0
	0	0	0	0	0	0	0	0	0	0	0	0
	0.1	0.1	0.1	0	0	0	0	0	0	0	0	0
	0	0	0	0	0	0	0	0	0	0	0	0
	0	0	0	0	0	0	0	0	0	0	0	0
	0	0	0	0	0	0	0	0	0	0	0	0
	0	0	0	0	0	0	0	0	0	0	0	0
	0	0	0	0	0	0	0	0	0	0	0	0
	0	0	0	0	0	0	0.1	0.1	0	0	0	0
	0	0	0	0	0	0	0	0	0	0	0	0
	0	0	0	0	0	0	0	0	0	0	0	0
	0	0	0	0	0	0	0	0	0	0	0	0
	0	0	0	0	0	0	0	0	0	0	0	0
	0	0	0	0	0	0	0.1	0.1	0.1	0	0	0
	0	0	0	0	0	0	0	0	0	0	0	0
	0	0	0	0	0	0	0	0	0	0	0	0
	0	0	0	0	0	0	0	0	0	0	0	0
	0	0	0	0	0	0	0	0	0	0	0	0
	0	0	0	0	0	0	0	0	0	0	0	0
	0	0	0	0	0	0	0.1	0.1	0.1	0	0	0
	0	0	0	0	0	0	0.1	0.1	0.1	0	0	0
	0	0	0	0	0	0	0	0	0	0	0	0
	0	0	0	0	0	0	0	0	0	0	0	0
	0	0	0	0	0	0	0	0	0	0.1	0.1	0.1
	0	0	0	0	0	0	0	0	0	0	0	0
	0	0	0	0	0	0	0	0	0	0	0	0
	0	0	0	0	0	0	0	0	0	0	0	0
	0	0	0	0	0	0	0	0	0	0	0	0
	0	0	0	0	0	0	0	0	0	0	0	0
	0	0	0	0	0	0	0.1	0.1	0.1	0	0	0
	0	0	0	0	0	0	0	0	0	0	0	0
	0	0	0	0	0	0	0	0	0	0	0	0
	0	0	0	0	0	0	0	0	0	0	0	0
	0	0	0	0.1	0.1	0.1	0	0	0	0	0	0
	0	0	0	0	0	0	0.1	0.1	0.1	0	0	0
	0	0	0	0	0	0	0.1	0.1	0.1	0	0	0
	0	0	0	0	0	0	0	0	0	0	0	0
	0	0	0	0	0	0	0	0	0	0	0	0
	0	0	0	0.1	0.1	0.1	0	0	0	0	0	0
	0	0	0	0.1	0.1	0.1	0	0	0	0.1	0.1	0.1
	0	0	0	0.1	0.1	0.1	0	0	0	0.1	0.1	0
	0	0	0	0	0	0	0	0	0	0	0	0
	0	0	0	0	0	0	0.1	0.1	0.1	0	0	0
	0	0	0	0	0	0	0	0	0	0	0	0
	0	0	0	0	0	0	0	0	0	0	0	0
	0	0	0	0.1	0.1	0.1	0.1	0.1	0.1	0	0	0
	0	0	0	0	0	0	0	0	0	0.1	0.1	0.1
	0	0	0	0.1	0.1	0.1	0	0	0	0	0	0
	0	0	0	0	0	0	0	0	0	0.1	0.1	0.1
	0	0	0	0	0	0	0	0	0	0	0	0
	0	0	0	0	0	0	0.4	0.3	0	0	0	0
	0	0	0	0	0	0	0	0	0	0	0	0
	0	0	0	0	0	0	0	0	0	0	0	0
	0	0	0	0	0	0	0	0	0	0	0	0
	0	0	0	0	0	0	0	0	0	0	0	0
	0	0	0	0	0	0	0.1	0.1	0.1	0	0	0
	0	0	0	0	0	0	0	0	0	0	0	0
	0	0	0	0.1	0.1	0.1	0.1	0.1	0.1	0	0	0
	0	0	0	0	0	0	0	0	0	0	0	0
	0	0	0	0	0	0	0	0	0	0	0	0
	0	0	0	0	0	0	0.1	0.1	0.1	0	0	0
	0	0	0	0	0	0	0	0	0	0	0	0
	0	0	0	0	0	0	0	0	0	0	0	0
	0	0	0	0	0	0	0	0	0	0	0	0
	0	0	0	0	0	0	0	0	0	0	0	0
	0	0	0	0	0	0	0	0	0	0	0	0
	0	0	0	0	0	0	0	0	0	0	0	0
	0	0	0	0.1	0.1	0.1	0	0	0	0	0	0
	0	0	0	0	0	0	0.1	0.1	0.1	0	0	0
	0	0	0	0	0	0	0.1	0.1	0.1	0	0	0
	0	0	0	0	0	0	0	0	0	0	0	0
	0	0	0	0	0	0	0	0	0	0	0	0
	0	0	0	0	0	0	0	0	0	0	0	0
	0	0	0	0	0	0	0	0	0	0	0	0
	0	0	0	0.1	0.1	0.1	0	0	0	0	0	0
	0	0	0	0	0	0	0	0	0	0	0	0
	0	0	0	0	0	0	0	0	0	0	0	0
	0	0	0	0	0	0	0	0	0	0	0	0
	0	0	0	0	0	0	0	0	0	0	0	0
	0	0	0	0.1	0.1	0.1	0	0	0	0	0	0
	0	0	0	0	0	0	0	0	0	0	0	0
	0	0	0	0	0	0	0	0	0	0.1	0.1	0.1
	0	0	0	0	0	0	0	0	0	0.1	0.1	0.1
	0.4	0.3	0	0	0	0	0	0	0	0	0	0
	0	0	0	0.1	0.1	0.1	0.1	0.1	0.1	0	0	0
	0	0	0	0	0	0	0	0	0	0	0	0
	0	0	0	0.1	0.1	0.1	0	0	0	0	0	0
	0	0	0	0	0	0	0	0	0	0	0	0
	0	0	0	0	0	0	0.1	0.1	0.1	0	0	0
	0	0	0	0	0	0	0	0	0	0	0	0
	0	0	0	0	0	0	0	0	0	0	0	0
	0	0	0	0	0	0	0	0	0	0	0	0
	0	0	0	0.1	0.1	0.1	0	0	0	0	0	0
	0	0	0	0	0	0	0.1	0.1	0.1	0	0	0
	0	0	0	0	0	0	0.1	0.1	0.1	0	0	0
	0	0	0	0	0	0	0	0	0	0	0	0
	0	0	0	0	0	0	0	0	0	0	0	0
	0	0	0	0	0	0	0.1	0.1	0.1	0	0	0
	0	0	0	0	0	0	0	0	0	0	0	0
	0	0	0	0.1	0.1	0.1	0	0	0	0.1	0.1	0.1
	0	0	0	0	0	0	0.1	0.1	0.1	0	0	0
	0	0	0	0	0	0	0	0	0	0	0	0
	0	0	0	0	0	0	0	0	0	0	0	0
	0	0	0	0	0	0	0	0	0	0	0	0
	0	0	0	0	0	0	0	0	0	0	0	0
	0	0	0	0	0	0	0	0	0	0	0	0
	0	0	0	0	0	0	0	0	0	0	0	0
	0	0	0	0	0	0	0	0	0	0	0	0
	0	0	0	0	0	0	0	0	0	0	0	0
	0	0	0	0	0	0	0	0	0	0	0	0
	0.1	0.1	0	0.1	0.1	0.1	0	0	0	0	0	0
	0	0	0	0	0	0	0	0	0	0	0	0
	0	0	0	0	0	0	0	0	0	0	0	0
	0	0	0	0	0	0	0	0	0	0	0	0
	0	0	0	0.1	0.1	0.1	0.1	0.1	0.1	0	0	0
	0	0	0	0	0	0	0.1	0.1	0.1	0.1	0.1	0.1
	0	0	0	0.1	0.1	0.1	0	0	0	0	0	0
	0	0	0	0	0	0	0	0	0	0	0	0
	0	0	0	0	0	0	0	0	0	0	0	0
	0	0	0	0	0	0	0	0	0	0	0	0
	0	0	0	0	0	0	0	0	0	0	0	0
	0	0	0	0	0	0	0	0	0	0	0	0
	0	0	0	0.1	0.1	0.1	0	0	0	0	0	0
	0	0	0	0	0	0	0.1	0.1	0.1	0	0	0
	0	0	0	0	0	0	0	0	0	0	0	0
	0	0	0	0	0	0	0	0	0	0	0	0
	0	0	0	0	0	0	0	0	0	0	0	0
	0	0	0	0	0	0	0	0	0	0	0	0
	0	0	0	0	0	0	0	0	0	0	0	0
	0	0	0	0	0	0	0	0	0	0	0	0
	0	0	0	0	0	0	0	0	0	0	0	0
	0	0	0	0	0	0	0	0	0	0	0	0
	0.1	0.1	0.1	0	0	0	0	0	0	0	0	0
	0	0	0	0	0	0	0.1	0.1	0.1	0	0	0
	0	0	0	0	0	0	0	0	0	0	0	0
	0	0	0	0	0	0	0	0	0	0.1	0.1	0.1
	0	0	0	0	0	0	0.1	0.1	0.1	0	0	0
	0	0	0	0.1	0.1	0.1	0	0	0	0	0	0
	0	0	0	0	0	0	0	0	0	0	0	0
	0	0	0	0	0	0	0	0	0	0	0	0
	0	0	0	0	0	0	0	0	0	0	0	0
	0	0	0	0	0	0	0	0	0	0.9	0.6	0
	0	0	0	0	0	0	0	0	0	0	0	0
	0	0	0	0	0	0	0	0	0	0	0	0
	0	0	0	0	0	0	0.1	0.1	0.1	0	0	0
	0	0	0	0.1	0.1	0.1	0	0	0	0.1	0.1	0.1
	0	0	0	0	0	0	0.1	0.1	0.1	0	0	0
	0	0	0	0	0	0	0	0	0	0.1	0.1	0.1
	0	0	0	0	0	0	0	0	0	0	0	0
	0	0	0	0	0	0	0	0	0	0	0	0
	0	0	0	0	0	0	0.1	0.1	0.1	0	0	0
	0	0	0	0	0	0	0	0	0	0	0	0
	0	0	0	0	0	0	0	0	0	0	0	0
	0	0	0	0.1	0.1	0.1	0	0	0	0	0	0
	0	0	0	0	0	0	0	0	0	0	0	0
	0	0	0	0	0	0	0.1	0.1	0.1	0	0	0
	0	0	0	0	0	0	0	0	0	0	0	0
	0	0	0	0	0	0	0	0	0	0	0	0
	0	0	0	0	0	0	0	0	0	0	0	0
	0	0	0	0	0	0	0	0	0	0	0	0
	0	0	0	0	0	0	0	0	0	0	0	0
	0	0	0	0	0	0	0.1	0.1	0.1	0	0	0
	0	0	0	0	0	0	0	0	0	0	0	0
	0	0	0	0	0	0	0	0	0	0	0	0
	0	0	0	0	0	0	0.7	0.5	0	0	0	0
	0	0	0	0	0	0	0.1	0.1	0.1	0	0	0
	0	0	0	0	0	0	0.1	0.1	0.1	0	0	0
	0	0	0	0	0	0	0.1	0.1	0.1	0	0	0
	0	0	0	0	0	0	0	0	0	0	0	0
	0	0	0	0	0	0	0.1	0.1	0.1	0	0	0
	0	0	0	0	0	0	0	0	0	0	0	0
	0	0	0	0	0	0	0.1	0.1	0.1	0	0	0
	0	0	0	0.1	0.1	0.1	0	0	0	0	0	0
	0	0	0	0	0	0	0	0	0	0	0	0
	0	0	0	0	0	0	0	0	0	0	0	0
	0	0	0	0.1	0.1	0.1	0	0	0	0	0	0
	0	0	0	0.1	0.1	0.1	0	0	0	0	0	0
	0	0	0	0	0	0	0.1	0.1	0.1	0	0	0
	0	0	0	0	0	0	0.1	0.1	0.1	0	0	0
	0	0	0	0	0	0	0	0	0	0	0	0
	0	0	0	0	0	0	0	0	0	0	0	0
	0	0	0	0	0	0	0.1	0.1	0.1	0	0	0
	0	0	0	0	0	0	0	0	0	0	0	0
	0	0	0	0	0	0	0.1	0.1	0.1	0	0	0
	0	0	0	0.1	0.1	0.1	0.1	0.1	0.1	1	0.6	0.1
	0	0	0	0.1	0.1	0.1	0	0	0	0	0	0
	0	0	0	0.1	0.1	0.1	0.1	0.1	0.1	0	0	0
	0	0	0	0	0	0	0	0	0	0	0	0
	0	0	0	0	0	0	0.1	0.1	0.1	0	0	0
	0	0	0	0	0	0	0	0	0	0	0	0
	0	0	0	0	0	0	0.1	0.1	0.1	0	0	0
	0	0	0	0.1	0.1	0.1	0	0	0	0	0	0
	0	0	0	0	0	0	0.1	0.1	0.1	0	0	0
	0	0	0	0	0	0	0	0	0	0.1	0.1	0.1
	0	0	0	0	0	0	0	0	0	0	0	0
	0	0	0	0	0	0	0	0	0	0	0	0
	0	0	0	0	0	0	0	0	0	0	0	0
	0	0	0	0.1	0.1	0.1	0	0	0	0	0	0
	0	0	0	0	0	0	0	0	0	0	0	0
	0	0	0	0	0	0	0.1	0.1	0.1	0	0	0
	0	0	0	0.1	0.1	0.1	0.1	0.1	0.1	0	0	0
	0	0	0	0.1	0.1	0.1	0.1	0.1	0.1	0	0	0
	0	0	0	0	0	0	0.1	0.1	0.1	0	0	0
	0	0	0	0	0	0	0.1	0.1	0.1	0	0	0
	0	0	0	0	0	0	0	0	0	0.1	0.1	0.1
	0	0	0	0	0	0	0	0	0	0	0	0
	0	0	0	0	0	0	0	0	0	0	0	0
	0	0	0	0	0	0	0.1	0.1	0.1	0	0	0
	0	0	0	0	0	0	0	0	0	0	0	0
	0	0	0	0	0	0	0	0	0	0	0	0
	0	0	0	0	0	0	0	0	0	0	0	0
	0	0	0	0	0	0	0	0	0	0	0	0
	0	0	0	0	0	0	0	0	0	0	0	0
	0	0	0	0	0	0	0.1	0.1	0.1	0	0	0
	0	0	0	0	0	0	0	0	0	0	0	0
	0	0	0	0	0	0	0	0	0	0.1	0.1	0.1
	0	0	0	0	0	0	0	0	0	0.1	0.1	0.1
	0	0	0	0	0	0	0.1	0.1	0.1	0	0	0
	0	0	0	0	0	0	0.1	0.1	0.1	0	0	0
	0	0	0	0	0	0	0	0	0	0	0	0
	0	0	0	0	0	0	0	0	0	0	0	0
	0	0	0	0	0	0	0	0	0	0	0	0
	0	0	0	0	0	0	0.1	0.1	0.1	0	0	0
	0	0	0	0	0	0	0	0	0	0	0	0
	0	0	0	0	0	0	0	0	0	0	0	0
	0	0	0	0.1	0.1	0.1	0	0	0	0	0	0
	0	0	0	0	0	0	0	0	0	0	0	0
	0	0	0	0	0	0	0	0	0	0	0	0
	0	0	0	0.1	0.1	0.1	0.1	0.1	0.1	0	0	0
	0	0	0	0	0	0	0.1	0.1	0.1	0	0	0
	0	0	0	0.1	0.1	0.1	0	0	0	0	0	0
	0	0	0	0.1	0.1	0.1	0	0	0	0	0	0
	0	0	0	0	0	0	0	0	0	0	0	0
	0	0	0	0	0	0	0	0	0	0	0	0
	0	0	0	0	0	0	0	0	0	0	0	0
	0	0	0	0	0	0	0	0	0	0	0	0
	0	0	0	0	0	0	0	0	0	0	0	0
	0	0	0	0.1	0.1	0.1	0	0	0	0	0	0
	0	0	0	0	0	0	0.1	0.1	0.1	0	0	0
	0	0	0	0	0	0	0	0	0	0	0	0
	0	0	0	0	0	0	0	0	0	0	0	0
	0	0	0	0	0	0	0	0	0	0	0	0
	0	0	0	0	0	0	0	0	0	0	0	0
	0	0	0	0	0	0	0	0	0	0	0	0
	0	0	0	0.1	0.1	0.1	0.1	0.1	0.1	0	0	0
	0	0	0	0	0	0	0	0	0	0	0	0
	0	0	0	0	0	0	0	0	0	0	0	0
	0	0	0	0.1	0.1	0.1	0	0	0	0	0	0
	0	0	0	0	0	0	0	0	0	0	0	0
	0	0	0	0.1	0.1	0.1	0	0	0	0.1	0.1	0.1
	0	0	0	0	0	0	0.1	0.1	0.1	0	0	0
	0	0	0	0	0	0	0	0	0	0	0	0
	0	0	0	0	0	0	0.1	0.1	0.1	0	0	0
	0.1	0.1	0.1	0	0	0	0	0	0	0	0	0
	0	0	0	0.1	0.1	0.1	0	0	0	0	0	0
	0	0	0	0.1	0.1	0.1	0	0	0	0	0	0
	0	0	0	0	0	0	0	0	0	0	0	0
	0	0	0	0	0	0	0	0	0	0	0	0
	0	0	0	0	0	0	0.1	0.1	0.1	0	0	0
	0	0	0	0.1	0.1	0.1	0	0	0	0	0	0
	0	0	0	0	0	0	0	0	0	0.1	0.1	0.1
	0	0	0	0	0	0	0	0	0	0	0	0
	0	0	0	0	0	0	0	0	0	0	0	0
	0	0	0	0	0	0	0	0	0	0	0	0
	0	0	0	0.1	0.1	0.1	0	0	0	0	0	0
	0	0	0	0	0	0	0	0	0	0.1	0.1	0.1
	0	0	0	0.1	0.1	0.1	0.1	0.1	0.1	0	0	0
	0	0	0	0	0	0	0.1	0.1	0.1	0	0	0
	0	0	0	0	0	0	0.1	0.1	0.1	0	0	0
	0	0	0	0	0	0	0.1	0.1	0.1	0	0	0
	0	0	0	0	0	0	0	0	0	0	0	0
	0.1	0.1	0.1	0	0	0	0	0	0	0	0	0
	0	0	0	0.1	0.1	0.1	0	0	0	0	0	0
	0	0	0	0	0	0	0.1	0.1	0.1	0	0	0
	0.1	0.1	0.1	0	0	0	0	0	0	0	0	0
	0	0	0	0	0	0	0.1	0.1	0.1	0	0	0
	0.1	0.1	0.1	0	0	0	0	0	0	0	0	0
	0	0	0	0	0	0	0	0	0	0	0	0
	0	0	0	0.1	0.1	0.1	0.1	0.1	0.1	0	0	0
	0	0	0	0.1	0.1	0.1	0	0	0	0	0	0
	0	0	0	0	0	0	0	0	0	0	0	0
	0	0	0	0.1	0.1	0.1	0.1	0.1	0.1	0	0	0
	0	0	0	0	0	0	0	0	0	0	0	0
	0	0	0	0	0	0	0	0	0	0	0	0
	0	0	0	0.1	0.1	0.1	0	0	0	0	0	0
	0	0	0	0.1	0.1	0.1	0	0	0	0	0	0
	0	0	0	0	0	0	0	0	0	0	0	0
	0	0	0	0	0	0	0	0	0	0	0	0
	0	0	0	0	0	0	0	0	0	0.1	0.1	0.1
	0	0	0	0	0	0	0	0	0	0	0	0
	0	0	0	0	0	0	0	0	0	0	0	0
	0	0	0	0	0	0	0	0	0	0	0	0
	0	0	0	0	0	0	0	0	0	0	0	0
	0	0	0	0	0	0	0	0	0	0	0	0
	0	0	0	0	0	0	0.1	0.1	0.1	0	0	0
	0	0	0	0	0	0	0	0	0	0	0	0
	0	0	0	0	0	0	0	0	0	0	0	0
	0.1	0.1	0.1	0.1	0.1	0.1	0	0	0	0	0	0
	0	0	0	0	0	0	0	0	0	0	0	0
	0	0	0	0	0	0	0	0	0	0	0	0
	0	0	0	0	0	0	0	0	0	0	0	0
	0	0	0	0	0	0	0.2	0.2	0.1	0	0	0
	0	0	0	0.1	0.1	0.1	0	0	0	0	0	0
	0	0	0	0.1	0.1	0.1	0	0	0	0	0	0
	0	0	0	0.1	0.1	0.1	0	0	0	0	0	0
	0	0	0	0	0	0	0	0	0	0	0	0
	0	0	0	0	0	0	0	0	0	0	0	0
	0	0	0	0	0	0	0	0	0	0	0	0
	0	0	0	0.1	0.1	0.1	0.1	0.1	0.1	0	0	0
	0	0	0	0	0	0	0	0	0	0	0	0
	0	0	0	0	0	0	0	0	0	0	0	0
	0	0	0	0	0	0	0	0	0	0	0	0
	0	0	0	0	0	0	0.1	0.1	0.1	0	0	0
	0	0	0	0.1	0.1	0.1	0.1	0.1	0.1	0.1	0.1	0.1
	0	0	0	0	0	0	0	0	0	0	0	0
	0	0	0	0.1	0.1	0.1	0	0	0	0	0	0
	0	0	0	0	0	0	0	0	0	0	0	0
	0	0	0	0.1	0.1	0.1	0	0	0	0	0	0
	0	0	0	0	0	0	0	0	0	0	0	0
	0	0	0	0	0	0	0	0	0	0	0	0
	0	0	0	0.1	0.1	0.1	0	0	0	0	0	0
	0	0	0	0	0	0	0	0	0	0	0	0
	0	0	0	0	0	0	0.1	0.1	0.1	0	0	0
	0	0	0	0	0	0	0.1	0.1	0.1	0	0	0
	0	0	0	0.1	0.1	0.1	0.1	0.1	0.1	0	0	0
	0	0	0	0	0	0	0	0	0	0	0	0
	0	0	0	0	0	0	0.1	0.1	0.1	0	0	0
	0.1	0.1	0.1	0	0	0	0.1	0.1	0.1	0	0	0
	0	0	0	0.1	0.1	0.1	0	0	0	0	0	0
	0	0	0	0.1	0.1	0.1	0	0	0	0	0	0
	0	0	0	0.1	0.1	0.1	0	0	0	0	0	0
	0	0	0	0.1	0.1	0.1	0.1	0.1	0.1	0	0	0
	0	0	0	0	0	0	0	0	0	0	0	0
	0	0	0	0	0	0	0.1	0.1	0.1	0	0	0
	0	0	0	0.1	0.1	0.1	0	0	0	0	0	0
	0	0	0	0	0	0	0.1	0.1	0.1	0	0	0
	0	0	0	0	0	0	0	0	0	0	0	0
	0	0	0	0	0	0	0	0	0	0	0	0
	0	0	0	0.1	0.1	0.1	0	0	0	0	0	0
	0	0	0	0.1	0.1	0.1	0.1	0.1	0.1	0	0	0
	0	0	0	0.1	0.1	0.1	0.2	0.2	0.1	0.4	0.3	0
	0	0	0	0	0	0	0	0	0	0	0	0
	0	0	0	0	0	0	0.1	0.1	0.1	0	0	0
	0	0	0	0	0	0	0.1	0.1	0.1	0	0	0
	0	0	0	0	0	0	0	0	0	0	0	0
	0	0	0	0	0	0	0.1	0.1	0.1	0	0	0
	0	0	0	0	0	0	0.1	0.1	0.1	0	0	0
	0	0	0	0.1	0.1	0.1	0.1	0.1	0.1	0	0	0
	0	0	0	0.1	0.1	0.1	0	0	0	0	0	0
	0	0	0	0	0	0	0	0	0	0	0	0
	0	0	0	0	0	0	0.9	0.6	0	0	0	0
	0	0	0	0.1	0.1	0.1	0	0	0	0	0	0
	0	0	0	0	0	0	0	0	0	0	0	0
	0	0	0	0	0	0	0	0	0	0	0	0
	0	0	0	0	0	0	0	0	0	0	0	0
	0	0	0	0	0	0	0.1	0.1	0.1	0	0	0
	0	0	0	0	0	0	0	0	0	0	0	0
	0	0	0	0	0	0	0.1	0.1	0.1	0	0	0
	0	0	0	0	0	0	0	0	0	0	0	0
	0	0	0	0	0	0	0.1	0.1	0.1	0	0	0
	0	0	0	0	0	0	0	0	0	0	0	0
	0	0	0	0.1	0.1	0.1	0	0	0	0	0	0
	0	0	0	0	0	0	0	0	0	0	0	0
	0	0	0	0	0	0	0	0	0	0	0	0
	0	0	0	0	0	0	0.1	0.1	0.1	0	0	0
	0	0	0	0	0	0	0.1	0.1	0.1	0	0	0
	0	0	0	0.1	0.1	0.1	0	0	0	0	0	0
	0	0	0	0	0	0	0.1	0.1	0.1	0	0	0
	0	0	0	0	0	0	0	0	0	0	0	0
	0	0	0	0	0	0	0.1	0.1	0.1	0	0	0
	0	0	0	0	0	0	0	0	0	0	0	0
	0	0	0	0	0	0	0.1	0.1	0.1	0	0	0
	0	0	0	0	0	0	0	0	0	0	0	0
	0	0	0	0	0	0	0	0	0	0	0	0
	0	0	0	0	0	0	0.1	0.1	0.1	0	0	0
	0	0	0	0	0	0	0	0	0	0	0	0
	0	0	0	0	0	0	0	0	0	0	0	0
	0	0	0	0	0	0	0	0	0	0	0	0
	0	0	0	0	0	0	0	0	0	0.2	0.2	0.1
	0	0	0	0	0	0	0	0	0	0	0	0
	0	0	0	0	0	0	0.1	0.1	0.1	0	0	0
	0.1	0.1	0.1	0	0	0	0.1	0.1	0.1	0	0	0
	0	0	0	0.1	0.1	0.1	0.1	0.1	0.1	0	0	0
	0	0	0	0	0	0	0.1	0.1	0.1	0	0	0
	0	0	0	0.1	0.1	0.1	0	0	0	0	0	0
	0	0	0	0	0	0	0	0	0	0	0	0
	0	0	0	0	0	0	0.1	0.1	0.1	0	0	0
	0	0	0	0	0	0	0	0	0	0	0	0
	0	0	0	0	0	0	0.1	0.1	0.1	0	0	0
	0	0	0	0	0	0	0	0	0	0	0	0
	0	0	0	0.1	0.1	0.1	0	0	0	0	0	0
	0	0	0	0	0	0	0	0	0	0	0	0
	0	0	0	0	0	0	0.1	0.1	0.1	0	0	0
	0	0	0	0.1	0.1	0.1	0	0	0	0	0	0
	0	0	0	0.1	0.1	0.1	0	0	0	0	0	0
	0	0	0	0	0	0	0	0	0	0	0	0
	0.1	0.1	0.1	0	0	0	0.1	0.1	0.1	0	0	0
	0	0	0	0.1	0.1	0.1	0.1	0.1	0.1	0	0	0
	0	0	0	0	0	0	0.1	0.1	0.1	0	0	0
	0	0	0	0	0	0	0	0	0	0	0	0
	0	0	0	0	0	0	0	0	0	0	0	0
	0	0	0	0	0	0	0	0	0	0	0	0
	0	0	0	0	0	0	0	0	0	0	0	0
	0	0	0	0	0	0	0.1	0.1	0.1	0	0	0
	0	0	0	0	0	0	0	0	0	0	0	0
	0	0	0	0	0	0	0	0	0	0	0	0
	0	0	0	0	0	0	0.1	0.1	0.1	0	0	0
	0	0	0	0	0	0	0	0	0	0	0	0
	0	0	0	0.1	0.1	0.1	0	0	0	0	0	0
	0	0	0	0	0	0	0	0	0	0	0	0
	0	0	0	0	0	0	0	0	0	0	0	0
	0	0	0	0	0	0	0.1	0.1	0.1	0	0	0
	0	0	0	0.1	0.1	0.1	0.2	0.2	0.1	0	0	0
	0.1	0.1	0.1	0	0	0	0.1	0.1	0.1	0	0	0
	0	0	0	0	0	0	0.1	0.1	0.1	0	0	0
	0	0	0	0.1	0.1	0.1	0.1	0.1	0.1	0	0	0
	0	0	0	0.1	0.1	0.1	0	0	0	0	0	0
	0	0	0	0	0	0	0	0	0	0	0	0
	0.1	0.1	0.1	0	0	0	0.2	0.2	0.1	0	0	0
	0	0	0	0.1	0.1	0.1	0	0	0	0	0	0
	0	0	0	0	0	0	0.1	0.1	0.1	0	0	0
	0	0	0	0	0	0	0	0	0	0	0	0
	0	0	0	0.1	0.1	0.1	0.1	0.1	0.1	0	0	0
	0.1	0.1	0.1	0	0	0	0	0	0	0	0	0
	0	0	0	0	0	0	0	0	0	0.1	0.1	0.1
	0	0	0	0	0	0	0	0	0	0	0	0
	0	0	0	0	0	0	0	0	0	0	0	0
	0.1	0.1	0.1	0.1	0.1	0.1	0.1	0.1	0.1	0	0	0
	0.1	0.1	0.1	0	0	0	0.1	0.1	0.1	0	0	0
	0	0	0	0.1	0.1	0.1	0	0	0	0	0	0
	0	0	0	0	0	0	0	0	0	0	0	0
	0	0	0	0	0	0	0.1	0.1	0.1	0.1	0.1	0.1
	0	0	0	0.1	0.1	0.1	0	0	0	0	0	0
	0	0	0	0.1	0.1	0.1	0.1	0.1	0.1	0	0	0
	0.1	0.1	0.1	0	0	0	0	0	0	0	0	0
	0	0	0	0	0	0	0.1	0.1	0.1	0	0	0
	0	0	0	0	0	0	0	0	0	0	0	0
	0	0	0	0	0	0	0	0	0	0	0	0
	0	0	0	0.1	0.1	0.1	0.1	0.1	0.1	0	0	0
	0	0	0	0	0	0	0.1	0.1	0.1	0	0	0
	0	0	0	0.1	0.1	0.1	0.1	0.1	0.1	0	0	0
	0	0	0	0	0	0	0.1	0.1	0.1	0	0	0
	0	0	0	0	0	0	0.1	0.1	0.1	0	0	0
	0	0	0	0.1	0.1	0.1	0	0	0	0.1	0.1	0.1
	0.2	0.2	0	0	0	0	0.1	0.1	0.1	0	0	0
	0	0	0	0	0	0	0.1	0.1	0.1	0	0	0
	0	0	0	0	0	0	0.1	0.1	0.1	0	0	0
	0	0	0	0	0	0	0	0	0	0	0	0
	0	0	0	0.1	0.1	0.1	0.1	0.1	0.1	0	0	0
	0	0	0	0.2	0.2	0.1	0	0	0	0	0	0
	0	0	0	0.1	0.1	0.1	0.1	0.1	0.1	0	0	0
	0	0	0	0	0	0	0.1	0.1	0.1	0	0	0
	0	0	0	0.1	0.1	0.1	0.1	0.1	0.1	0	0	0
	0	0	0	0	0	0	0	0	0	0	0	0
	0	0	0	0	0	0	0.1	0.1	0.1	0	0	0
	0	0	0	0	0	0	0	0	0	0	0	0
	0.1	0.1	0.1	0.1	0.1	0.1	0	0	0	0	0	0
	0	0	0	0	0	0	0.1	0.1	0.1	0	0	0
	0	0	0	0	0	0	0.1	0.1	0.1	0	0	0
	0	0	0	0	0	0	0	0	0	0.1	0.1	0.1
	0	0	0	0	0	0	0	0	0	0	0	0
	0	0	0	0	0	0	0	0	0	0	0	0
	0	0	0	0	0	0	0.1	0.1	0.1	0	0	0
	0	0	0	0	0	0	0	0	0	0	0	0
	0	0	0	0	0	0	0	0	0	0	0	0
	0	0	0	0	0	0	0	0	0	0	0	0
	0	0	0	0.1	0.1	0.1	0	0	0	0	0	0
	0	0	0	0.1	0.1	0.1	0.1	0.1	0.1	0	0	0
	0	0	0	0	0	0	0.2	0.2	0.1	0	0	0
	0	0	0	0	0	0	0	0	0	0	0	0
	0	0	0	0	0	0	0.1	0.1	0.1	0	0	0
	0	0	0	0	0	0	0.1	0.1	0.1	0	0	0
	0	0	0	0	0	0	0	0	0	0	0	0
	0	0	0	0	0	0	0	0	0	0	0	0
	0	0	0	0	0	0	0	0	0	0	0	0
	0	0	0	0	0	0	0.1	0.1	0.1	0	0	0
	0.1	0.1	0.1	0.1	0.1	0.1	0	0	0	0	0	0
	0	0	0	0	0	0	0	0	0	0	0	0
	0	0	0	0.1	0.1	0.1	0.1	0.1	0.1	0	0	0
	0	0	0	0	0	0	0	0	0	0	0	0
	0	0	0	0.1	0.1	0.1	0	0	0	0	0	0
	0	0	0	0.1	0.1	0.1	0.1	0.1	0.1	0	0	0
	0.1	0.1	0.1	0	0	0	0	0	0	0	0	0
	0.1	0.1	0.1	0	0	0	0.1	0.1	0.1	0	0	0
	0	0	0	0	0	0	0.1	0.1	0.1	0	0	0
	0	0	0	0	0	0	0	0	0	0	0	0
	0	0	0	0.1	0.1	0.1	0	0	0	0	0	0
	0	0	0	0.1	0.1	0.1	0	0	0	0	0	0
	0	0	0	0.8	0.6	0.1	0	0	0	0	0	0
	0	0	0	0	0	0	0	0	0	0	0	0
	0	0	0	0	0	0	0	0	0	0	0	0
	0	0	0	0	0	0	0	0	0	0.1	0.1	0.1
	0	0	0	0.1	0.1	0.1	0.1	0.1	0.1	0	0	0
	0	0	0	0	0	0	0	0	0	0	0	0
	0	0	0	0.1	0.1	0.1	0.1	0.1	0.1	0	0	0
	0	0	0	0	0	0	0	0	0	0	0	0
	0	0	0	0	0	0	0	0	0	0	0	0
	0	0	0	0.1	0.1	0.1	0	0	0	0	0	0
	0	0	0	0.1	0.1	0.1	0.1	0.1	0.1	0	0	0
	0	0	0	0	0	0	0	0	0	0	0	0
	0	0	0	0.1	0.1	0.1	0.2	0.2	0.1	0	0	0
	0	0	0	0.1	0.1	0.1	0	0	0	0.1	0.1	0.1
	0	0	0	0	0	0	0.1	0.1	0.1	0	0	0
	0	0	0	0	0	0	0	0	0	0	0	0
	0.1	0.1	0.1	0	0	0	0.1	0.1	0.1	0	0	0
	0	0	0	0	0	0	0.1	0.1	0.1	0	0	0
	0	0	0	0.1	0.1	0.1	0	0	0	0	0	0
	0	0	0	0.1	0.1	0.1	0	0	0	0	0	0
	0	0	0	0	0	0	0.1	0.1	0.1	0	0	0
	0.1	0.1	0.1	0	0	0	0.1	0.1	0.1	0	0	0
	0	0	0	0	0	0	0.1	0.1	0.1	0	0	0
	0	0	0	0	0	0	0	0	0	0	0	0
	0	0	0	0	0	0	0.1	0.1	0.1	0	0	0
	0	0	0	0.2	0.2	0.1	0	0	0	0	0	0
	0	0	0	0	0	0	0.1	0.1	0.1	0	0	0
	0	0	0	0	0	0	0.1	0.1	0.1	0	0	0
	0	0	0	0	0	0	0.1	0.1	0.1	0	0	0
	0	0	0	0	0	0	0	0	0	0.1	0.1	0.1
	0	0	0	0	0	0	0	0	0	0	0	0
	0	0	0	0	0	0	0.1	0.1	0.1	0	0	0
	0	0	0	0	0	0	0	0	0	0	0	0
	0	0	0	0	0	0	0	0	0	0	0	0
	0	0	0	0	0	0	0.1	0.1	0.1	0	0	0
	0.1	0.1	0.1	0	0	0	0.1	0.1	0.1	0	0	0
	0	0	0	0	0	0	0.2	0.2	0.1	0	0	0
	0	0	0	0	0	0	0	0	0	0	0	0
	0	0	0	0	0	0	0.1	0.1	0.1	0	0	0
	0	0	0	0	0	0	0	0	0	0	0	0
	0	0	0	0	0	0	0.1	0.1	0.1	0	0	0
	0.1	0.1	0.1	0	0	0	0.1	0.1	0.1	0	0	0
	0	0	0	0	0	0	0.1	0.1	0.1	0	0	0
	0	0	0	0	0	0	0	0	0	0	0	0
	0	0	0	0	0	0	0	0	0	0	0	0
	0	0	0	0.1	0.1	0.1	0.1	0.1	0.1	0	0	0
	0	0	0	0.1	0.1	0.1	0.1	0.1	0.1	0	0	0
	0	0	0	0.1	0.1	0.1	0	0	0	0	0	0
	0.1	0.1	0.1	0	0	0	0.1	0.1	0.1	0	0	0
	0	0	0	0	0	0	0.1	0.1	0.1	0	0	0
	0.1	0.1	0.1	0	0	0	0.1	0.1	0.1	0	0	0
	0	0	0	0	0	0	0	0	0	0	0	0
	0	0	0	0	0	0	0.1	0.1	0.1	0	0	0
	0	0	0	0.1	0.1	0.1	0	0	0	0	0	0
	0	0	0	0.1	0.1	0.1	0.1	0.1	0.1	0	0	0
	0.1	0.1	0.1	0	0	0	0	0	0	0	0	0
	0.1	0.1	0.1	0	0	0	0.1	0.1	0.1	0	0	0
	0	0	0	0.1	0.1	0.1	0	0	0	0	0	0
	0	0	0	0	0	0	0.1	0.1	0.1	0	0	0
	0	0	0	0.1	0.1	0.1	0.1	0.1	0.1	0	0	0
	0	0	0	0	0	0	0.1	0.1	0.1	0	0	0
	0	0	0	0.1	0.1	0.1	0	0	0	0.1	0.1	0.1
	0	0	0	0	0	0	0	0	0	0	0	0
	0	0	0	0.1	0.1	0.1	0	0	0	0	0	0
	0.1	0.1	0.1	0	0	0	0	0	0	0	0	0
	0	0	0	0	0	0	0	0	0	0	0	0
	0	0	0	0.1	0.1	0.1	0	0	0	0	0	0
	0	0	0	0	0	0	0.1	0.1	0.1	0	0	0
	0.1	0.1	0.1	0	0	0	0	0	0	0	0	0
	0	0	0	0.1	0.1	0.1	0	0	0	0	0	0
	0	0	0	0	0	0	0	0	0	0.1	0.1	0.1
	0	0	0	0.1	0.1	0.1	0.1	0.1	0.1	0	0	0
	0	0	0	0	0	0	0.4	0.3	0	0	0	0
	0	0	0	0	0	0	0.1	0.1	0.1	0.1	0.1	0.1
	0	0	0	0	0	0	0	0	0	0	0	0
	0	0	0	0	0	0	0	0	0	0	0	0
	0	0	0	0.1	0.1	0.1	0.1	0.1	0.1	0	0	0
	0	0	0	0	0	0	0.1	0.1	0.1	0	0	0
	0	0	0	0.1	0.1	0.1	0	0	0	0	0	0
	0	0	0	0	0	0	0	0	0	0	0	0
	0	0	0	0	0	0	0	0	0	0	0	0
	0	0	0	0	0	0	0	0	0	0	0	0
	0.1	0.1	0.1	0	0	0	0	0	0	0	0	0
	0	0	0	0.1	0.1	0.1	0	0	0	0.1	0.1	0.1
	0	0	0	0	0	0	0	0	0	0	0	0
	0	0	0	0	0	0	0	0	0	0	0	0
	0	0	0	0.2	0.2	0.1	0	0	0	0	0	0
	0	0	0	0.1	0.1	0.1	0.1	0.1	0.1	0	0	0
	0	0	0	0.1	0.1	0.1	0	0	0	0	0	0
	0	0	0	0	0	0	0.1	0.1	0.1	0	0	0
	0.1	0.1	0.1	0	0	0	0.1	0.1	0.1	0	0	0
	0	0	0	0.1	0.1	0.1	0.1	0.1	0.1	0	0	0
	0	0	0	0	0	0	0.1	0.1	0.1	0	0	0
	0	0	0	0	0	0	0	0	0	0	0	0
	0	0	0	0.1	0.1	0.1	0.1	0.1	0.1	0	0	0
	0	0	0	0.1	0.1	0.1	0.1	0.1	0.1	0	0	0
	0	0	0	0	0	0	0	0	0	0.1	0.1	0.1
	0	0	0	0.1	0.1	0.1	0	0	0	0	0	0
	0	0	0	0	0	0	0	0	0	0	0	0
	0	0	0	0.1	0.1	0.1	0	0	0	0	0	0
	0	0	0	0.1	0.1	0.1	0.1	0.1	0.1	0	0	0
	0	0	0	0	0	0	0	0	0	0	0	0
	0	0	0	0.1	0.1	0.1	0.1	0.1	0.1	0	0	0
	0.1	0.1	0.1	0	0	0	0.1	0.1	0.1	0	0	0
	0	0	0	0	0	0	0.1	0.1	0.1	0	0	0
	0	0	0	0.1	0.1	0.1	0	0	0	0	0	0
	0	0	0	0	0	0	0.1	0.1	0.1	0	0	0
	0.1	0.1	0.1	0.1	0.1	0.1	0.1	0.1	0.1	0	0	0
	0	0	0	0.1	0.1	0.1	0.1	0.1	0.1	0	0	0
	0	0	0	0	0	0	0	0	0	0	0	0
	0	0	0	0	0	0	0.1	0.1	0.1	0	0	0
	0	0	0	0.1	0.1	0.1	0	0	0	0	0	0
	0	0	0	0.1	0.1	0.1	0.1	0.1	0.1	0	0	0
	0	0	0	0	0	0	0	0	0	0	0	0
	0	0	0	0	0	0	0	0	0	0	0	0
	0	0	0	0.1	0.1	0.1	0.1	0.1	0.1	0	0	0
	0	0	0	0.1	0.1	0.1	0	0	0	0	0	0
	0	0	0	0	0	0	0.1	0.1	0.1	0	0	0
	0	0	0	0.1	0.1	0.1	0	0	0	0	0	0
	0	0	0	0	0	0	0.1	0.1	0.1	0	0	0
	0	0	0	0	0	0	0.1	0.1	0.1	0	0	0
	0	0	0	0.1	0.1	0.1	0	0	0	0	0	0
	0	0	0	0	0	0	0.1	0.1	0.1	0	0	0
	0	0	0	0	0	0	0.1	0.1	0.1	0	0	0
	0	0	0	0.1	0.1	0.1	0	0	0	0	0	0
	0	0	0	0	0	0	0	0	0	0	0	0
	0	0	0	0.1	0.1	0.1	0.1	0.1	0.1	0	0	0
	0	0	0	0	0	0	0.1	0.1	0.1	0	0	0
	0	0	0	0	0	0	0	0	0	0	0	0
				0.1	0.1	0.1	0.1	0.1	0.1	0	0	0
				0	0	0	0	0	0	0	0	0
				0	0	0	0.1	0.1	0.1	0	0	0
				0.1	0.1	0.1	0.1	0.1	0.1	0	0	0
				0	0	0	0	0	0	0	0	0
				0	0	0	0	0	0	0	0	0
				0	0	0	0	0	0	0	0	0
				0	0	0	0	0	0	0	0	0
				0	0	0	0.1	0.1	0.1	0	0	0
				0	0	0	0.1	0.1	0.1	0	0	0
				0	0	0	0	0	0	0	0	0
				0.1	0.1	0.1	0	0	0	0	0	0
				0	0	0	0.1	0.1	0.1	0	0	0
				0	0	0	0	0	0	0	0	0
				0	0	0	0	0	0	0	0	0
				0.1	0.1	0.1	0.1	0.1	0.1	0	0	0
				0.1	0.1	0.1	0.1	0.1	0.1	0	0	0
				0	0	0	0	0	0	0	0	0
				0	0	0	0	0	0	0	0	0
				0	0	0	0.1	0.1	0.1	0	0	0
				0.1	0.1	0.1	0.1	0.1	0.1	0	0	0
				0	0	0	0.1	0.1	0.1	0	0	0
				0.1	0.1	0.1	0	0	0	0	0	0
				0	0	0	0.1	0.1	0.1	0	0	0
				0	0	0	0	0	0	0	0	0
				0	0	0	0	0	0	0	0	0
				0.1	0.1	0.1	0.1	0.1	0.1	0	0	0
				0	0	0	0	0	0	0	0	0
				0	0	0	0.1	0.1	0.1	0.1	0.1	0
				0.1	0.1	0.1	0	0	0	0	0	0
				0	0	0	0	0	0	0	0	0
				0	0	0	0	0	0	0	0	0
				0	0	0	0.1	0.1	0.1	0	0	0
				0	0	0	0.1	0.1	0.1	0	0	0
				0	0	0	0.1	0.1	0.1	0	0	0
				0	0	0	0	0	0	0	0	0
				0.1	0.1	0.1	0.1	0.1	0.1	0	0	0
				0	0	0	0	0	0	0	0	0
				0	0	0	0	0	0	0	0	0
				0	0	0	0	0	0	0	0	0
				0	0	0	0	0	0	0	0	0
				0	0	0	0	0	0	0	0	0
				0.2	0.2	0.1	0	0	0	0	0	0
				0.1	0.1	0.1	0.1	0.1	0.1	0	0	0
				0.1	0.1	0.1	0.1	0.1	0.1	0	0	0
				0	0	0	0	0	0	0	0	0
				0.1	0.1	0.1	0	0	0	0	0	0
				0	0	0	0	0	0	0	0	0
				0.1	0.1	0.1	0	0	0	0	0	0
				0.1	0.1	0.1	0	0	0	0	0	0
				0	0	0	0	0	0	0	0	0
				0	0	0	0.1	0.1	0.1	0	0	0
				0	0	0	0.1	0.1	0.1	0	0	0
				0	0	0	0	0	0	0	0	0
				0	0	0	0	0	0	0	0	0
				0	0	0	0.1	0.1	0.1	0	0	0
				0	0	0	0	0	0	0	0	0
				0	0	0	0.1	0.1	0.1	0	0	0
				0	0	0	0.1	0.1	0.1	0	0	0
				0	0	0	0.1	0.1	0.1	0	0	0
				0	0	0	0	0	0	0	0	0
				0.1	0.1	0.1	0.1	0.1	0.1	0	0	0
				0	0	0	0.1	0.1	0.1	0	0	0
				0	0	0	0.1	0.1	0.1	0	0	0
				0	0	0	0.1	0.1	0.1	0	0	0
				0	0	0	0	0	0	0	0	0
				0	0	0	0	0	0	0	0	0
				0.1	0.1	0.1	0	0	0	0	0	0
				0	0	0	0	0	0	0	0	0
				0	0	0	0.1	0.1	0.1	0	0	0
				0.1	0.1	0.1	0	0	0	0	0	0
				0	0	0	0	0	0	0	0	0
				0	0	0	0.1	0.1	0.1	0	0	0
				0	0	0	0.2	0.2	0.1	0	0	0
				0.1	0.1	0.1	0	0	0	0.9	0.6	0
				0.1	0.1	0.1	0.1	0.1	0.1	0	0	0
				0	0	0	0.1	0.1	0.1	0	0	0
				0	0	0	0	0	0	0	0	0
				0	0	0	0.1	0.1	0.1	0	0	0
				0	0	0	0	0	0	0	0	0
				0	0	0	0	0	0	0	0	0
				0	0	0	0.1	0.1	0.1	0	0	0
				0	0	0	0	0	0	0	0	0
				0	0	0	0.1	0.1	0.1	0	0	0
				0.1	0.1	0.1	0.1	0.1	0.1	0	0	0
				0	0	0	0.1	0.1	0.1	0	0	0
				0.1	0.1	0.1	0.1	0.1	0.1	0	0	0
				0	0	0	0.1	0.1	0.1	0	0	0
				0.1	0.1	0.1	0.1	0.1	0.1	0	0	0
				0.1	0.1	0.1	0	0	0	0	0	0
				0.1	0.1	0.1	0.1	0.1	0.1	0	0	0
				0.1	0.1	0.1	0.1	0.1	0.1	0	0	0
				0	0	0	0	0	0	0	0	0
				0	0	0	0	0	0	0	0	0
				0	0	0	0	0	0	0	0	0
				0.1	0.1	0.1	0.1	0.1	0.1	0	0	0
				0	0	0	0.1	0.1	0.1	0	0	0
				0.1	0.1	0.1	0.2	0.2	0.1	0	0	0
				0	0	0	0.1	0.1	0.1	0.1	0.1	0.1
				0	0	0	0.1	0.1	0.1	0	0	0
				0.1	0.1	0.1	0.1	0.1	0.1	0	0	0
				0	0	0	0	0	0	0	0	0
				0.1	0.1	0.1	0.1	0.1	0.1	0	0	0
				0	0	0	0	0	0	0	0	0
				0.1	0.1	0.1	0	0	0	0	0	0
				0.1	0.1	0.1	0.1	0.1	0.1	0	0	0
				0	0	0	0.1	0.1	0.1	0	0	0
				0	0	0	0	0	0	0	0	0
				0	0	0	0	0	0	0	0	0
				0.1	0.1	0.1	0.1	0.1	0.1	0	0	0
				0.1	0.1	0.1	0	0	0	0	0	0
				0	0	0	0.1	0.1	0.1	0	0	0
				0	0	0	0	0	0	0	0	0
				0.1	0.1	0.1	0.1	0.1	0.1	0	0	0
				0	0	0	0.1	0.1	0.1	0	0	0
				0	0	0	0	0	0	0	0	0
				0	0	0	0.1	0.1	0.1	0	0	0
				0	0	0	0	0	0	0	0	0
				0	0	0	0.1	0.1	0.1	0	0	0
				0.1	0.1	0.1	0	0	0	0	0	0
				0	0	0	0	0	0	0	0	0
				0.1	0.1	0.1	0	0	0	0	0	0
				0.1	0.1	0.1	0.1	0.1	0.1	0	0	0
				0	0	0	0.1	0.1	0.1	0	0	0
				0	0	0	0	0	0	0	0	0
				0	0	0	0	0	0	0	0	0
				0	0	0	0.1	0.1	0.1	0	0	0
				0.1	0.1	0.1	0	0	0	0	0	0
				0.1	0.1	0.1	0.1	0.1	0.1	0	0	0
				0	0	0	0.1	0.1	0.1	0	0	0
				0.1	0.1	0.1	0	0	0	0	0	0
				0.1	0.1	0.1	0	0	0	0	0	0
				0	0	0	0.1	0.1	0.1	0	0	0
				0.1	0.1	0.1	0	0	0	0	0	0
				0.1	0.1	0.1	0	0	0	0	0	0
				0	0	0	0.1	0.1	0.1	0	0	0
				0	0	0	0.1	0.1	0.1	0	0	0
				0	0	0	0	0	0	0	0	0
				0.1	0.1	0.1	0	0	0	0.1	0.1	0.1
				0	0	0	0	0	0	0.1	0.1	0.1
				0.1	0.1	0.1	0.1	0.1	0.1	0	0	0
				0	0	0	0.1	0.1	0.1	0	0	0
				0	0	0	0	0	0	0	0	0
				0	0	0	0.1	0.1	0.1	0	0	0
				0	0	0	0.1	0.1	0.1	0	0	0
				0.1	0.1	0.1	0.1	0.1	0.1	0	0	0
				0	0	0	0	0	0	0	0	0
				0	0	0	0.1	0.1	0.1	0	0	0
				0.1	0.1	0.1	0.1	0.1	0.1	0	0	0
				0.1	0.1	0.1	0	0	0	0	0	0
				0.1	0.1	0.1	0	0	0	0	0	0
				0	0	0	0.1	0.1	0.1	0	0	0
				0.1	0.1	0.1	0.1	0.1	0.1	0	0	0
				0.1	0.1	0.1	0.1	0.1	0.1	0	0	0
				0	0	0	0	0	0	0	0	0
				0	0	0	0.2	0.1	0.1	0	0	0
				0	0	0	0	0	0	0	0	0
				0	0	0	0	0	0	0	0	0
				0.1	0.1	0.1	0.1	0.1	0.1	0	0	0
				0.1	0.1	0.1	0.1	0.1	0.1	0	0	0
				0	0	0	0	0	0	0	0	0
				0	0	0	0.1	0.1	0.1	0	0	0
				0	0	0	0	0	0	0	0	0
				0	0	0	0.1	0.1	0.1	0	0	0
				0.1	0.1	0.1	0	0	0	0	0	0
				0.1	0.1	0.1	0.1	0.1	0.1	0	0	0
				0	0	0	0.1	0.1	0.1	0	0	0
				0.1	0.1	0.1	0.1	0.1	0.1	0	0	0
				0	0	0	0	0	0	0	0	0
				0	0	0	0	0	0	0	0	0
				0.1	0.1	0.1	0.1	0.1	0.1	0	0	0
				0	0	0	0.1	0.1	0.1	0	0	0
				0.1	0.1	0.1	0	0	0	0	0	0
				0.1	0.1	0.1	0.1	0.1	0.1	0	0	0
				0.1	0.1	0.1	0	0	0	0	0	0
				0	0	0	0.1	0.1	0.1	0	0	0
				0.1	0.1	0.1	0	0	0	0	0	0
				0	0	0	0.1	0.1	0.1	0	0	0
				0	0	0	0.1	0.1	0.1	0	0	0
				0.1	0.1	0.1	0.1	0.1	0.1	0.1	0.1	0.1
				0	0	0	0.1	0.1	0.1	0	0	0
				0	0	0	0.1	0.1	0.1	0	0	0
				0.1	0.1	0.1	0	0	0	0	0	0
				0.1	0.1	0.1	0.1	0.1	0.1	0	0	0
				0.1	0.1	0.1	0	0	0	0	0	0
				0	0	0	0.1	0.1	0.1	0	0	0
				0.1	0.1	0.1	0	0	0	0	0	0
				0	0	0	0.1	0.1	0.1	0	0	0
				0	0	0	0	0	0	0.1	0.1	0.1
				0.1	0.1	0.1	0.1	0.1	0.1	0	0	0
				0	0	0	0.1	0.1	0.1	0	0	0
				0	0	0	0.1	0.1	0.1	0	0	0
				0.1	0.1	0.1	0.1	0.1	0.1	0	0	0
				0	0	0	0.1	0.1	0.1	0	0	0
				0	0	0	0.1	0.1	0.1	0	0	0
				0	0	0	0	0	0	0	0	0
				0	0	0	0.1	0.1	0.1	0	0	0
				0	0	0	0	0	0	0	0	0
				0.1	0.1	0.1	0.1	0.1	0.1	0	0	0
				0	0	0	0.1	0.1	0.1	0	0	0
				0.1	0.1	0.1	0.1	0.1	0.1	0	0	0
				0	0	0	0	0	0	0	0	0
				0.1	0.1	0.1	0.1	0.1	0.1	0	0	0
				0	0	0	0.1	0.1	0.1	0	0	0
				0	0	0	0	0	0	0	0	0
				0	0	0	0	0	0	0	0	0
				0	0	0	0.1	0.1	0.1	0	0	0
				0.1	0.1	0.1	0	0	0	0	0	0
				0.1	0.1	0.1	0	0	0	0	0	0
				0.1	0.1	0.1	0	0	0	0	0	0
				0.1	0.1	0.1	0.1	0.1	0.1	0.4	0.3	0
				0.1	0.1	0.1	0.1	0.1	0.1	0	0	0
				0	0	0	0.1	0.1	0.1	0	0	0
				0.1	0.1	0.1	0	0	0	0	0	0
				0	0	0	0.1	0.1	0.1	0	0	0
				0.1	0.1	0.1	0	0	0	0	0	0
				0.1	0.1	0.1	0.1	0.1	0.1	0	0	0
				0.1	0.1	0.1	0	0	0	0	0	0
				0	0	0	0	0	0	0	0	0
				0	0	0	0.1	0.1	0.1	0	0	0
				0.1	0.1	0.1	0	0	0	0	0	0
				0	0	0	0.1	0.1	0.1	0	0	0
				0	0	0	0.1	0.1	0.1	0	0	0
				0.1	0.1	0.1	0.1	0.1	0.1	0	0	0
				0.1	0.1	0.1	0	0	0	0	0	0
				0	0	0	0.1	0.1	0.1	0	0	0
				0.1	0.1	0.1	0	0	0	0	0	0
				0.1	0.1	0.1	0.1	0.1	0.1	0	0	0
				0	0	0	0	0	0	0	0	0
				0.1	0.1	0.1	0	0	0	0	0	0
				0	0	0	0.1	0.1	0.1	0	0	0
				0	0	0	0.1	0.1	0.1	0	0	0
				0	0	0	0	0	0	0	0	0
				0.1	0.1	0.1	0	0	0	0	0	0
				0	0	0	0	0	0	0	0	0
				0	0	0	0.1	0.1	0.1	0	0	0
				0	0	0	0	0	0	0	0	0
				0	0	0	0	0	0	0	0	0
				0	0	0	0.1	0.1	0.1	0	0	0
				0	0	0	0.1	0.1	0.1	0	0	0
				0	0	0	0.1	0.1	0.1	0	0	0
				0.1	0.1	0.1	0.1	0.1	0.1	0	0	0
				0	0	0	0.1	0.1	0.1	0	0	0
				0.1	0.1	0.1	0	0	0	0	0	0
				0	0	0	0.1	0.1	0.1	0	0	0
				0	0	0	0	0	0	0	0	0
				0	0	0	0	0	0	0	0	0
				0.1	0.1	0.1	0	0	0	0	0	0
				0	0	0	0	0	0	0	0	0
				0	0	0	0.1	0.1	0.1	0	0	0
				0.1	0.1	0.1	0	0	0	0	0	0
				0.1	0.1	0.1	0	0	0	0	0	0
				0	0	0	0	0	0	0	0	0
				0.1	0.1	0.1	0	0	0	0	0	0
				0.1	0.1	0.1	0.1	0.1	0.1	0	0	0
				0.1	0.1	0.1	0.1	0.1	0.1	0	0	0
				0	0	0	0.1	0.1	0.1	0	0	0
				0	0	0	0.1	0.1	0.1	0	0	0
				0.1	0.1	0.1	0.1	0.1	0.1	0	0	0
				0	0	0	0.1	0.1	0.1	0	0	0
				0	0	0	0	0	0	0	0	0
				0.1	0.1	0.1	0.1	0.1	0.1	0	0	0
				0	0	0	0.1	0.1	0.1	0.1	0.1	0.1
				0	0	0	0.1	0.1	0.1	0	0	0
				0	0	0	0.1	0.1	0.1	0	0	0
				0	0	0	0	0	0	0	0	0
				0	0	0	0	0	0	0	0	0
				0	0	0	0	0	0	0	0	0
				0	0	0	0.1	0.1	0.1	0	0	0
				0	0	0	0.1	0.1	0.1	0	0	0
				0	0	0	0.1	0.1	0.1	0	0	0
				0.1	0.1	0.1	0.1	0.1	0.1	0	0	0
				0	0	0	0.1	0.1	0.1	0	0	0
				0.1	0.1	0.1	0.1	0.1	0.1	0	0	0
				0	0	0	0	0	0
				0.1	0.1	0.1	0	0	0
				0	0	0	0	0	0
				0	0	0	0	0	0
				0.1	0.1	0.1	0.1	0.1	0.1
				0	0	0	0	0	0
				0.1	0.1	0.1	0	0	0
				0.1	0.1	0.1	0.1	0.1	0.1
				0	0	0	0.1	0.1	0.1
				0	0	0	0	0	0
				0.1	0.1	0.1	0.1	0.1	0.1
				0	0	0	0	0	0
				0.1	0.1	0.1	0	0	0
				0	0	0	0.1	0.1	0.1
				0	0	0	0	0	0
				0	0	0	0.1	0.1	0.1
				0	0	0	0	0	0
				0.1	0.1	0.1	0.1	0.1	0.1
				0.1	0.1	0.1	0.1	0.1	0.1
				0	0	0	0.1	0.1	0.1
				0	0	0	0.1	0.1	0.1
				0	0	0	0	0	0
				0.1	0.1	0.1	0.1	0.1	0.1
				0.1	0.1	0.1	0.1	0.1	0.1
				0.1	0.1	0.1	0.1	0.1	0.1
				0.1	0.1	0.1	0	0	0
				0.1	0.1	0.1	0.1	0.1	0.1
				0.1	0.1	0.1	0	0	0
				0	0	0	0.1	0.1	0.1
				0	0	0	0.1	0.1	0.1
				0.1	0.1	0.1	0.1	0.1	0.1
				0	0	0	0.1	0.1	0.1
				0.1	0.1	0.1	0.1	0.1	0.1
				0	0	0	0.1	0.1	0.1
				0	0	0	0.1	0.1	0.1
				0	0	0	0.1	0.1	0.1
				0.1	0.1	0.1	0	0	0
				0.1	0.1	0.1	0.1	0.1	0.1
				0	0	0	0	0	0
				0.1	0.1	0.1	0	0	0
				0	0	0	0.1	0.1	0.1
				0	0	0	0	0	0
				0.1	0.1	0.1	0	0	0
				0	0	0	0.1	0.1	0.1
				0.1	0.1	0.1	0	0	0
				0	0	0	0	0	0
				0	0	0	0.1	0.1	0.1
				0	0	0	0	0	0
				0	0	0	0.1	0.1	0.1
				0.1	0.1	0.1	0	0	0
				0.1	0.1	0.1	0.1	0.1	0.1
				0	0	0	0.4	0.4	0.1
				0	0	0	0.1	0.1	0.1
				0	0	0	0	0	0
				0.1	0.1	0.1	0	0	0
				0	0	0	0.1	0.1	0.1
				0	0	0	0.1	0.1	0.1
				0.1	0.1	0.1	0	0	0
				0.1	0.1	0.1	0.1	0.1	0.1
				0.1	0.1	0.1	0.1	0.1	0.1
				0.1	0.1	0.1	0	0	0
				0	0	0	0.1	0.1	0.1
				0	0	0	0.1	0.1	0.1
				0	0	0	0	0	0
				0	0	0	0.1	0.1	0.1
				0	0	0	0	0	0
				0	0	0	0	0	0
				0	0	0	0.1	0.1	0.1
				0	0	0	0.1	0.1	0.1
				0	0	0	0.1	0.1	0.1
				0	0	0	0.1	0.1	0.1
				0	0	0	0.1	0.1	0.1
				0.1	0.1	0.1	0	0	0
				0	0	0	0	0	0
				0	0	0	0	0	0
				0.1	0.1	0.1	0.1	0.1	0.1
				0	0	0	0.1	0.1	0.1
				0	0	0	0.1	0.1	0.1
				0.1	0.1	0.1	0	0	0
				0	0	0	0.1	0.1	0.1
				0.1	0.1	0.1	0.1	0.1	0.1
				0.1	0.1	0.1	0.1	0.1	0.1
				0.1	0.1	0.1	0.1	0.1	0.1
				0	0	0	0.1	0.1	0.1
				0	0	0	0.1	0.1	0.1
				0.1	0.1	0.1	0.1	0.1	0.1
				0.1	0.1	0.1	0	0	0
				0.1	0.1	0.1	0	0	0
				0.1	0.1	0.1	0	0	0
				0	0	0	0	0	0
				0	0	0	0	0	0
				0.1	0.1	0.1	0	0	0
				0.1	0.1	0.1	0	0	0
				0	0	0	0.1	0.1	0.1
				0.1	0.1	0.1	0.1	0.1	0.1
				0	0	0	0.1	0.1	0.1
				0	0	0	0.1	0.1	0.1
				0.1	0.1	0.1	0.1	0.1	0.1
				0	0	0	0.1	0.1	0.1
				0.1	0.1	0.1	0.1	0.1	0.1
				0	0	0	0	0	0
				0.1	0.1	0.1	0.1	0.1	0.1
				0	0	0	0.1	0.1	0.1
				0	0	0	0.1	0.1	0.1
				0.1	0.1	0.1	0.1	0.1	0.1
				0	0	0	0.1	0.1	0.1
				0.1	0.1	0.1	0.1	0.1	0.1
				0	0	0	0.1	0.1	0.1
				0.1	0.1	0.1	0	0	0
				0.1	0.1	0.1	0	0	0
				0.1	0.1	0.1	0	0	0
				0	0	0	0.1	0.1	0.1
				0	0	0	0	0	0
				0	0	0	0	0	0
				0	0	0	0.1	0.1	0.1
				0.1	0.1	0.1	0.1	0.1	0.1
				0.1	0.1	0.1	0	0	0
				0.1	0.1	0.1	0	0	0
				0	0	0	0.1	0.1	0.1
				0.1	0.1	0.1	0.1	0.1	0.1
				0	0	0	0	0	0
				0	0	0	0.1	0.1	0.1
				0.1	0.1	0.1	0.1	0.1	0.1
				0	0	0	0.1	0.1	0.1
				0	0	0	0	0	0
				0	0	0	0.1	0.1	0.1
				0	0	0	0	0	0
				0.1	0.1	0.1	0	0	0
				0	0	0	0	0	0
				0	0	0	0.1	0.1	0.1
				0	0	0	0.1	0.1	0.1
				0	0	0	0.1	0.1	0.1
				0	0	0	0.1	0.1	0.1
				0.1	0.1	0.1	0.1	0.1	0.1
				0	0	0	0.1	0.1	0.1
				0	0	0	0.1	0.1	0.1
				0.1	0.1	0.1	0.1	0.1	0.1
				0.1	0.1	0.1	0	0	0
				0	0	0	0	0	0
				0	0	0	0	0	0
				0.2	0.2	0.1	0	0	0
				0.1	0.1	0.1	0	0	0
				0.1	0.1	0.1	0	0	0
				0	0	0	0	0	0
				0	0	0	0.1	0.1	0.1
				0	0	0	0	0	0
				0	0	0	0.1	0.1	0.1
				0.1	0.1	0.1	0.1	0.1	0.1
				0	0	0	0.1	0.1	0.1
				0.1	0.1	0.1	0.1	0.1	0.1
				0.1	0.1	0.1	0.1	0.1	0.1
				0.1	0.1	0.1	0	0	0
				0	0	0	0	0	0
				0	0	0	0.1	0.1	0.1
				0	0	0	0.1	0.1	0.1
				0	0	0	0	0	0
				0	0	0	0	0	0
				0.1	0.1	0.1	0.1	0.1	0.1
				0	0	0	0	0	0
				0.1	0.1	0.1	0.1	0.1	0.1
				0.1	0.1	0.1	0	0	0
				0.1	0.1	0.1	0.1	0.1	0.1
				0	0	0	0.1	0.1	0.1
				0.1	0.1	0.1	0	0	0
				0.1	0.1	0.1	0	0	0
				0	0	0	0	0	0
				0	0	0	0	0	0
				0	0	0	0.1	0.1	0.1
				0	0	0	0.1	0.1	0.1
				0	0	0	0.1	0.1	0.1
				0	0	0	0	0	0
				0	0	0	0	0	0
				0	0	0	0	0	0
				0.1	0.1	0.1	0.1	0.1	0.1
				0	0	0	0.1	0.1	0.1
				0.1	0.1	0.1	0.1	0.1	0.1
				0.1	0.1	0.1	0.1	0.1	0.1
				0	0	0	0	0	0
				0	0	0	0.1	0.1	0.1
				0.1	0.1	0.1	0	0	0
				0	0	0	0.1	0.1	0.1
				0.1	0.1	0.1	0.1	0.1	0.1
				0.1	0.1	0.1	0	0	0
				0	0	0	0.1	0.1	0.1
				0	0	0	0.1	0.1	0.1
				0.1	0.1	0.1	0	0	0
				0	0	0	0	0	0
				0.1	0.1	0.1	0	0	0
				0	0	0	0.1	0.1	0.1
				0.1	0.1	0.1	0.1	0.1	0.1
				0	0	0	0	0	0
				0	0	0	0.1	0.1	0.1
				0	0	0	0.1	0.1	0.1
				0	0	0	0	0	0
				0	0	0	0	0	0
				0.1	0.1	0.1	0	0	0
				0	0	0	0.1	0.1	0.1
				0.1	0.1	0.1	0.1	0.1	0.1
				0	0	0	0	0	0
				0	0	0	0.1	0.1	0.1
				0.1	0.1	0.1	0.1	0.1	0.1
				0	0	0	0.1	0.1	0.1
				0	0	0	0.1	0.1	0.1
				0	0	0	0.1	0.1	0.1
				0	0	0	0	0	0
				0.1	0.1	0.1	0	0	0
				0	0	0	0.1	0.1	0.1
				0.1	0.1	0.1	0	0	0
				0	0	0	0.1	0.1	0.1
				0	0	0	0.1	0.1	0.1
				0	0	0	0.1	0.1	0.1
				0	0	0	0.1	0.1	0.1
				0	0	0	0.1	0.1	0.1
				0.1	0.1	0.1	0	0	0
				0.1	0.1	0.1	0.1	0.1	0.1
				0	0	0	0.1	0.1	0.1
				0.1	0.1	0.1	0.1	0.1	0.1
				0	0	0	0	0	0
				0.1	0.1	0.1	0.1	0.1	0.1
				0	0	0	0.1	0.1	0.1
				0	0	0	0.1	0.1	0.1
				0	0	0	0	0	0
				0.1	0.1	0.1	0.2	0.2	0.1
				0	0	0	0.1	0.1	0.1
				0.1	0.1	0.1	0.1	0.1	0.1
				0.1	0.1	0.1	0	0	0
				0	0	0	0	0	0
				0.1	0.1	0.1	0.1	0.1	0.1
				0.1	0.1	0.1	0	0	0
				0.1	0.1	0.1	0.1	0.1	0.1
				0.1	0.1	0.1	0.1	0.1	0.1
				0	0	0	0.1	0.1	0.1
				0	0	0	0.1	0.1	0.1
				0.1	0.1	0.1	0.1	0.1	0.1
				0	0	0	0.1	0.1	0.1
				0	0	0	0.1	0.1	0.1
				0.1	0.1	0.1	0	0	0
				0	0	0	0	0	0
				0	0	0	0.1	0.1	0.1
				0	0	0	0	0	0
				0	0	0	0.1	0.1	0.1
				0	0	0	0.1	0.1	0.1
				0.1	0.1	0.1	0	0	0
				0	0	0	0.1	0.1	0.1
				0.1	0.1	0.1	0.1	0.1	0.1
				0	0	0	0.1	0.1	0.1
				0	0	0	0	0	0
				0.1	0.1	0.1	0	0	0
				0.1	0.1	0.1	0.1	0.1	0.1
				0.1	0.1	0.1	0	0	0
				0.1	0.1	0.1	0.1	0.1	0.1
				0	0	0	0.1	0.1	0.1
				0.1	0.1	0.1	0	0	0
				0	0	0	0	0	0
				0	0	0	0	0	0
				0.1	0.1	0.1	0	0	0
				0	0	0	0.1	0.1	0.1
				0	0	0	0.1	0.1	0.1
				0	0	0	0	0	0
				0.1	0.1	0.1	0.1	0.1	0.1
				0.1	0.1	0.1	0.1	0.1	0.1
				0	0	0	0.1	0.1	0.1
				0.1	0.1	0.1	0	0	0
				0.1	0.1	0.1	0.1	0.1	0.1
				0	0	0	0.1	0.1	0.1
				0.1	0.1	0.1	0	0	0
				0	0	0	0.1	0.1	0.1
				0.1	0.1	0.1	0.1	0.1	0.1
				0	0	0	0.1	0.1	0.1
				0.1	0.1	0.1	0	0	0
				0.1	0.1	0.1	0.1	0.1	0.1
				0	0	0	0	0	0
				0.1	0.1	0.1	0	0	0
				0	0	0	0	0	0
				0	0	0	0	0	0
				0.1	0.1	0.1	0	0	0
				0	0	0	0	0	0
				0	0	0	0	0	0
				0	0	0	0.1	0.1	0.1
				0.1	0.1	0.1	0.1	0.1	0.1
				0.1	0.1	0.1	0	0	0
				0.1	0.1	0.1	0	0	0
				0	0	0	0.1	0.1	0.1
				0	0	0	0.1	0.1	0.1
				0.1	0.1	0.1	0.1	0.1	0.1
				0	0	0	0	0	0
				0	0	0	0	0	0
				0.1	0.1	0.1	0	0	0
				0	0	0	0	0	0
				0.1	0.1	0.1	0.1	0.1	0.1
				0	0	0	0	0	0
				0	0	0	0	0	0
				0	0	0	0	0	0
				0	0	0	0	0	0
				0	0	0	0	0	0
				0.1	0.1	0.1	0.1	0.1	0.1
				0	0	0	0	0	0
				0	0	0	0.1	0.1	0.1
				0.1	0.1	0.1	0.1	0.1	0.1
				0.1	0.1	0.1	0.1	0.1	0.1
				0	0	0	0	0	0
				0	0	0	0.1	0.1	0.1
				0.1	0.1	0.1	0	0	0
				0.1	0.1	0.1	0.1	0.1	0.1
				0.1	0.1	0.1	0.1	0.1	0.1
				0.1	0.1	0.1	0.1	0.1	0.1
				0	0	0	0	0	0
				0.1	0.1	0.1	0	0	0
				0.1	0.1	0.1	0.1	0.1	0.1
				0	0	0	0	0	0
				0.1	0.1	0.1	0.1	0.1	0.1
				0	0	0	0	0	0
				0.1	0.1	0.1	0.1	0.1	0.1
				0	0	0	0	0	0
				0.1	0.1	0.1	0.1	0.1	0.1
				0	0	0	0.1	0.1	0.1
				0.1	0.1	0.1	0	0	0
				0.1	0.1	0.1	0.1	0.1	0.1
				0	0	0	0	0	0
				0.1	0.1	0.1	0.1	0.1	0.1
				0.2	0.2	0.1	0	0	0
				0	0	0	0.1	0.1	0.1
				0.1	0.1	0.1	0.1	0.1	0.1
				0.1	0.1	0.1	0.1	0.1	0.1
				0.1	0.1	0.1	0	0	0
				0.1	0.1	0.1	0.1	0.1	0.1
				1	0.7	0.1	0.1	0.1	0.1
				0	0	0	0	0	0
				0	0	0	0.1	0.1	0.1
				0	0	0	0.1	0.1	0.1
				0	0	0	0.1	0.1	0.1
				0	0	0	0.1	0.1	0.1
				0	0	0	0	0	0
				0.1	0.1	0.1	0.1	0.1	0.1
				0	0	0	0.1	0.1	0.1
				0	0	0	0	0	0
				0.1	0.1	0.1	0	0	0
				0	0	0	0.1	0.1	0.1
				0.1	0.1	0.1	0	0	0
				0.1	0.1	0.1	0	0	0
				0.1	0.1	0.1	0.1	0.1	0.1
				0	0	0	0.1	0.1	0.1
				0	0	0	0	0	0
				0	0	0	0.1	0.1	0.1
				0.1	0.1	0.1	0.1	0.1	0.1
				0.1	0.1	0.1	0.1	0.1	0.1
				0	0	0	0.1	0.1	0.1
				0	0	0	0	0	0
				0	0	0	0.1	0.1	0.1
				0.1	0.1	0.1	0.1	0.1	0.1
				0	0	0	0.1	0.1	0.1
				0.1	0.1	0.1	0	0	0
				0	0	0	0.1	0.1	0.1
				0	0	0	0.1	0.1	0.1
				0	0	0	0.6	0.5	0.2
				0	0	0	0.3	0.3	0.3
				0	0	0	0.2	0.2	0.2
				0.1	0.1	0.1	0.2	0.2	0.2
				1.2	0.6	0.1	0.2	0.2	0.2
				0.1	0.1	0.1	0.2	0.2	0.2
				0	0	0	0.3	0.3	0.3
				0	0	0	0.2	0.2	0.2
				0.1	0.1	0.1	0.3	0.3	0.3
				0	0	0	0.2	0.2	0.2
				0	0	0	0.2	0.2	0.2
				0.1	0.1	0.1	0.9	0.7	0.2
				0	0	0	0.2	0.2	0.2
				0	0	0	0.2	0.2	0.2
				0	0	0	0.2	0.2	0.2
				0	0	0	0.2	0.2	0.2
				0	0	0	0.2	0.2	0.2
				0.1	0.1	0.1	0.2	0.2	0.2
				0	0	0	0.2	0.2	0.2
				0	0	0	0.1	0.1	0.1
				0	0	0	0.1	0.1	0.1
				0	0	0	0.1	0.1	0.1
				0.1	0.1	0.1	0.1	0.1	0.1
				0.1	0.1	0.1	0.1	0.1	0.1
				0	0	0	0.1	0.1	0.1
				0.1	0.1	0.1	0.1	0.1	0.1
				0	0	0	0.1	0.1	0.1
				0	0	0	0.1	0.1	0.1
				0	0	0	0.1	0.1	0.1
				0	0	0	0.1	0.1	0.1
				0	0	0	0.1	0.1	0.1
				0	0	0	0.1	0.1	0.1
				0	0	0	0.1	0.1	0.1
				0	0	0	0.1	0.1	0.1
				0	0	0	0	0	0
				0.1	0.1	0.1	0.1	0.1	0.1
				0.1	0.1	0.1	0.1	0.1	0.1
				0	0	0	0.1	0.1	0.1
				0.1	0.1	0.1	0.1	0.1	0.1
				0	0	0	0	0	0
				0.1	0.1	0.1	0	0	0
				0.1	0.1	0.1	0.1	0.1	0.1
				0	0	0	0	0	0
				0.1	0.1	0.1	0.1	0.1	0.1
				0	0	0	0.1	0.1	0.1
				0	0	0	0	0	0
				0.1	0.1	0.1	0	0	0
				0.1	0.1	0.1	0.1	0.1	0.1
				0.1	0.1	0.1	0	0	0
				0.1	0.1	0.1	0.1	0.1	0.1
				0	0	0	0	0	0
				0.1	0.1	0.1	0	0	0
				0	0	0	0	0	0
				0	0	0	0	0	0
				0.1	0.1	0.1
				0	0	0
				0	0	0
				0	0	0
				0	0	0
				0.1	0.1	0.1
				0.1	0.1	0.1
				0	0	0
				0.1	0.1	0.1
				0	0	0
				0.1	0.1	0.1
				0.1	0.1	0.1
				0.1	0.1	0.1
				0.1	0.1	0.1
				0	0	0
				0.1	0.1	0.1
				0	0	0
				0.1	0.1	0.1
				0	0	0
				0.1	0.1	0.1
				0.1	0.1	0.1
				0	0	0
				0	0	0
				0.1	0.1	0.1
				0	0	0
				0.1	0.1	0.1
				0	0	0
				0.1	0.1	0.1
				0	0	0
				0	0	0
				0	0	0
				0	0	0
				0.1	0.1	0.1
				0	0	0
				0	0	0
				0	0	0
				0.1	0.1	0.1
				0	0	0
				0.1	0.1	0.1
				0	0	0
				0.1	0.1	0.1
				0	0	0
				0.1	0.1	0.1
				0.1	0.1	0.1
				0.1	0.1	0.1
				0.1	0.1	0.1
				0	0	0
				0	0	0
				0.1	0.1	0.1
				0	0	0
				0	0	0
				0.1	0.1	0.1
				0	0	0
				0	0	0
				0.1	0.1	0.1
				0.1	0.1	0.1
				0.1	0.1	0.1
				0.1	0.1	0.1
				0	0	0
				0.1	0.1	0.1
				0	0	0
				0.1	0.1	0.1
				0	0	0
				0.1	0.1	0.1
				0.1	0.1	0.1
				0.1	0.1	0.1
				0.1	0.1	0.1
				0	0	0
				0	0	0
				0	0	0
				0.1	0.1	0.1
				0.1	0.1	0.1
				0	0	0
				0.1	0.1	0.1
				0	0	0
				0.1	0.1	0.1
				0	0	0
				0.1	0.1	0.1
				0.1	0.1	0.1
				0	0	0
				0.1	0.1	0.1
				0.1	0.1	0.1
				0	0	0
				0	0	0
				0.1	0.1	0.1
				0.1	0.1	0.1
				0.1	0.1	0.1
				0.1	0.1	0.1
				0	0	0
				0	0	0
				0	0	0
				0.1	0.1	0.1
				0.1	0.1	0.1
				0	0	0
				0.1	0.1	0.1
				0.1	0.1	0.1
				0.1	0.1	0.1
				0.1	0.1	0.1
				0.1	0.1	0.1
				0	0	0
				0.1	0.1	0.1
				0	0	0
				0.1	0.1	0.1
				0.1	0.1	0.1
				0	0	0
				0.1	0.1	0.1
				0	0	0
				0.1	0.1	0.1
				0.1	0.1	0.1
				0	0	0
				0	0	0
				0.1	0.1	0.1
				0	0	0
				0	0	0
				0.1	0.1	0.1
				0.1	0.1	0.1
				0.1	0.1	0.1
				0	0	0
				0	0	0
	0	0	0	0	0	0	0	0	0	0	0	0
	0	0	0	0	0	0	0	0	0	0	0	0.1
	0	0	0	0	0	0	0.3	0.6	0	0	0	0
	0	0	0	0	0	0	0	0	0	0	0	0
	0	0	0	0	0	0	0	0	0	0	0	0
	0	0	0	0	0	0	0	0	0	0	0	0
	0	0	0	0	0	0	0	0	0	0	0	0
	0	0	0	0	0	0	0	0	0.1	0	0	0
	0	0	0	0	0	0	0	0	0	0	0	0
	0	0	0	0	0	0	0	0	0	0	0	0
	0	0	0	0	0	0.1	0	0	0	0	0	0
	0	0	0	0	0	0.1	0	0	0	0	0	0
	0	0	0	0	0	0	0	0	0	0	0	0
	0	0	0	0	0	0.1	0	0.2	0	0	0	0
	0	0	0	0	0	0	0	0	0.1	0	0	0
	0	0	0	0	0	0	0	0	0.1	0	0	0
	0	0	0	0	0	0	0	0	0	0	0	0.1
	0	0	0	0	0	0	0	0	0	0	0	0
	0	0	0	0	0	0	0	0	0.1	0	0	0
	0	0	0	0	0	0	0	0	0	0	0	0
	0	0	0	0	0	0	0	0	0	0	0	0
	0	0	0	0	0	0.1	0	0	0	0	0	0
	0	0	0	0	0	0	0	0	0	0	0	0.1
	0	0	0	0	0	0	0	0	0	0	0	0.1
	0	0	0	0	0	0	0	0	0	0	0	0
	0	0	0	0	0	0	0	0	0	0	0	0
	0	0	0	0	0	0	0	0	0	0	0	0.1
	0	0	0	0	0	0	0	0	0	0	0	0
	0	0	0	0	0	0	0	0	0	0	0	0.1
	0	0	0	0	0	0	0	0	0	0	0	0
	0	0	0	0	0	0	0	0	0	0	0	0
	0	0	0	0	0	0	0	0	0	0	0	0
	0	0	0	0	0	0	0	0	0	0	0	0
	0	0	0	0	0	0	0	0	0	0	0	0
	0	0	0	0	0	0	0	0	0	0	0	0
	0	0	0	0	0	0	0	0	0	0	0	0
	0	0	0	0	0	0	0	0	0	0	0	0
	0	0	0	0	0	0	0	0	0.1	0	0	0
	0	0	0	0	0	0	0	0	0	0	0	0
	0	0	0	0	0	0	0	0	0	0	0	0.1
	0	0	0	0	0	0	0	0	0	0	0	0
	0	0	0	0	0	0	0	0	0	0	0	0
	0	0	0	0	0	0	0	0	0	0	0	0
	0	0	0	0	0	0.1	0	0	0	0	0	0
	0	0	0	0	0	0	0	0	0	0	0	0
	0	0	0	0	0	0	0	0	0	0	0	0
	0	0	0	0	0	0	0	0	0	0	0	0
	0	0	0	0	0	0	0	0	0	0	0	0
	0	0	0	0	0	0	0	0	0	0	0	0
	0	0	0	0	0	0	0	0	0	0	0	0.1
	0	0	0	0	0	0.1	0	0	0	0	0	0
	0	0	0	0	0	0	0	0	0	0	0	0
	0	0	0	0	0	0.1	0	0	0	0	0	0
	0	0	0	0	0	0	0	0	0	0	0	0
	0	0	0	0	0	0	0	0	0.1	0	0	0
	0	0	0	0	0	0	0	0	0	0	0	0
	0.1	0.3	0	0	0	0	0	0	0	0	0	0.1
	0	0	0	0	0	0	0	0	0	0	0	0
	0	0	0	0	0	0	0	0	0	0	0	0
	0	0	0	0	0	0	0	0	0	0	0	0
	0	0	0	0	0	0	0	0	0	0	0	0
	0	0	0	0	0	0	0	0	0	0	0	0
	0	0	0	0	0	0	0	0	0	0	0	0
	0	0	0	0	0	0	0	0	0	0	0	0
	0	0	0	0	0	0	0	0	0	0	0	0
	0	0	0	0	0	0	0	0	0.1	0	0	0
	0	0	0	0	0	0	0	0	0	0	0	0
	0	0	0	0	0	0	0	0	0	0	0	0
	0	0	0	0	0	0	0	0	0	0	0	0.1
	0	0	0	0	0	0	0	0	0	0	0	0
	0	0	0	0	0	0	0	0	0	0	0	0
	0	0	0	0	0	0	0	0	0	0	0	0
	0	0	0	0	0	0	0	0	0	0	0	0
	0	0	0	0	0	0	0	0	0	0	0	0
	0	0	0	0	0	0.1	0	0	0	0	0	0
	0	0	0	0	0	0	0	0	0	0	0	0
	0	0	0	0	0	0	0	0	0	0	0	0
	0	0	0	0	0	0	0	0	0	0	0	0
	0	0	0	0	0	0	0	0	0	0	0	0
	0	0	0	0	0	0	0	0	0	0	0	0
	0	0	0	0	0	0	0	0	0	0	0	0
	0	0	0	0	0	0	0	0	0	0	0	0
	0	0	0	0	0	0	0	0	0	0	0	0
	0	0	0	0	0	0	0	0	0	0	0	0.1
	0	0	0	0	0	0	0	0	0	0	0	0.1
	0	0	0	0	0	0	0	0	0	0	0	0
	0	0	0	0	0	0	0	0	0	0	0	0
	0	0	0	0	0	0	0	0	0	0	0	0
	0	0	0	0	0	0	0	0	0	0	0	0
	0	0	0	0	0	0	0	0	0.1	0	0	0.1
	0	0	0	0	0	0	0	0	0	0	0	0
	0	0	0	0	0	0	0	0	0	0	0	0
	0	0	0	0	0	0	0	0	0	0	0	0
	0	0	0	0	0	0	0	0	0	0	0	0
	0	0	0	0	0	0	0	0	0	0	0	0
	0	0	0	0	0	0	0	0	0	0	0	0
	0	0	0	0	0	0	0	0	0	0	0	0
	0	0	0	0	0	0	0	0	0	0	0	0
	0	0	0	0	0	0	0	0	0	0	0	0
	0	0	0	0	0	0.1	0	0	0	0	0	0
	0	0	0	0	0	0	0	0	0	0	0	0
	0	0	0	0	0	0	0	0	0	0	0	0
	0	0	0	0	0	0	0	0	0	0	0	0
	0	0	0	0	0	0	0	0	0	0	0	0
	0	0	0.1	0	0	0	0	0	0	0	0	0
	0	0	0	0	0	0	0	0	0	0	0	0
	0	0	0.1	0	0	0	0	0	0	0	0	0
	0	0	0	0	0	0	0	0	0.1	0	0	0.1
	0	0	0	0	0	0	0	0	0	0	0	0
	0	0	0	0	0	0	0	0	0	0	0	0
	0	0	0	0	0	0	0	0	0	0	0	0.1
	0	0	0	0	0	0	0	0	0	0	0	0
	0	0	0	0	0	0	0	0	0	0	0	0
	0	0	0	0	0	0	0	0	0	0	0	0
	0	0	0	0	0	0	0	0	0	0	0	0
	0	0	0	0	0	0	0	0	0	0	0	0
	0	0	0	0	0	0	0	0	0	0	0	0.1
	0	0	0	0	0	0.1	0	0	0	0	0	0
	0	0	0	0	0	0	0	0	0.1	0	0	0
	0	0	0	0	0	0	0	0	0	0	0	0
	0	0	0	0	0	0.1	0	0	0	0	0	0
	0	0	0	0	0	0	0	0	0	0	0	0
	0	0	0	0	0	0	0	0	0	0	0	0
	0	0	0	0	0	0	0	0	0	0	0	0
	0	0	0	0	0	0.1	0	0	0	0	0	0
	0	0	0	0	0	0.1	0	0	0.1	0	0	0
	0	0	0	0	0	0	0	0	0	0	0	0
	0	0	0	0	0	0	0	0	0	0	0	0
	0	0	0.1	0	0	0	0	0	0	0	0	0
	0	0	0	0	0	0	0	0	0	0	0	0
	0	0	0	0	0	0	0	0	0	0	0	0
	0	0	0	0	0	0	0	0	0	0	0	0
	0	0	0	0	0	0	0	0	0	0	0	0
	0	0	0	0	0	0	0	0	0	0	0	0
	0	0	0	0	0	0	0	0.1	0	0	0	0
	0	0	0	0	0	0	0	0	0	0	0	0
	0	0	0	0	0	0	0	0	0	0	0	0
	0	0	0	0	0	0	0	0	0	0	0	0
	0	0	0	0	0	0	0	0	0	0	0	0
	0	0	0	0	0	0	0	0	0.1	0	0	0
	0	0	0	0	0	0	0	0	0	0	0	0
	0	0	0	0	0	0	0	0	0	0	0	0
	0	0	0	0	0	0	0	0	0	0	0	0
	0	0	0	0	0	0	0	0	0	0	0	0
	0	0	0	0	0	0	0	0	0	0	0	0
	0	0	0	0	0	0	0	0	0.1	0	0	0
	0	0	0	0	0	0	0	0	0.1	0	0	0
	0	0	0	0	0	0	0	0	0	0	0	0
	0	0	0	0	0	0	0	0	0	0	0	0
	0	0	0	0	0	0	0	0	0	0	0	0.1
	0	0	0	0	0	0	0	0	0	0	0	0
	0	0	0	0	0	0	0	0	0	0	0	0
	0	0	0	0	0	0	0	0	0	0	0	0
	0	0	0	0	0	0	0	0	0	0	0	0
	0	0	0	0	0	0	0	0	0	0	0	0
	0	0	0	0	0	0	0	0	0.1	0	0	0
	0	0	0	0	0	0	0	0	0	0	0	0
	0	0	0	0	0	0	0	0	0	0	0	0
	0	0	0	0	0	0	0	0	0	0	0	0
	0	0	0	0	0	0.1	0	0	0	0	0	0
	0	0	0	0	0	0	0	0	0.1	0	0	0
	0	0	0	0	0	0	0	0	0.1	0	0	0
	0	0	0	0	0	0	0	0	0	0	0	0
	0	0	0	0	0	0	0	0	0	0	0	0
	0	0	0	0	0	0.1	0	0	0	0	0	0
	0	0	0	0	0	0.1	0	0	0	0	0	0.1
	0	0	0	0	0	0.1	0	0	0	0	0.1	0
	0	0	0	0	0	0	0	0	0	0	0	0
	0	0	0	0	0	0	0	0	0.1	0	0	0
	0	0	0	0	0	0	0	0	0	0	0	0
	0	0	0	0	0	0	0	0	0	0	0	0
	0	0	0	0	0	0.1	0	0	0.1	0	0	0
	0	0	0	0	0	0	0	0	0	0	0	0.1
	0	0	0	0	0	0.1	0	0	0	0	0	0
	0	0	0	0	0	0	0	0	0	0	0	0.1
	0	0	0	0	0	0	0	0	0	0	0	0
	0	0	0	0	0	0	0.1	0.3	0	0	0	0
	0	0	0	0	0	0	0	0	0	0	0	0
	0	0	0	0	0	0	0	0	0	0	0	0
	0	0	0	0	0	0	0	0	0	0	0	0
	0	0	0	0	0	0	0	0	0	0	0	0
	0	0	0	0	0	0	0	0	0.1	0	0	0
	0	0	0	0	0	0	0	0	0	0	0	0
	0	0	0	0	0	0.1	0	0	0.1	0	0	0
	0	0	0	0	0	0	0	0	0	0	0	0
	0	0	0	0	0	0	0	0	0	0	0	0
	0	0	0	0	0	0	0	0	0.1	0	0	0
	0	0	0	0	0	0	0	0	0	0	0	0
	0	0	0	0	0	0	0	0	0	0	0	0
	0	0	0	0	0	0	0	0	0	0	0	0
	0	0	0	0	0	0	0	0	0	0	0	0
	0	0	0	0	0	0	0	0	0	0	0	0
	0	0	0	0	0	0	0	0	0	0	0	0
	0	0	0	0	0	0.1	0	0	0	0	0	0
	0	0	0	0	0	0	0	0	0.1	0	0	0
	0	0	0	0	0	0	0	0	0.1	0	0	0
	0	0	0	0	0	0	0	0	0	0	0	0
	0	0	0	0	0	0	0	0	0	0	0	0
	0	0	0	0	0	0	0	0	0	0	0	0
	0	0	0	0	0	0	0	0	0	0	0	0
	0	0	0	0	0	0.1	0	0	0	0	0	0
	0	0	0	0	0	0	0	0	0	0	0	0
	0	0	0	0	0	0	0	0	0	0	0	0
	0	0	0	0	0	0	0	0	0	0	0	0
	0	0	0	0	0	0	0	0	0	0	0	0
	0	0	0	0	0	0.1	0	0	0	0	0	0
	0	0	0	0	0	0	0	0	0	0	0	0
	0	0	0	0	0	0	0	0	0	0	0	0.1
	0	0	0	0	0	0	0	0	0	0	0	0.1
	0.1	0.3	0	0	0	0	0	0	0	0	0	0
	0	0	0	0	0	0.1	0	0	0.1	0	0	0
	0	0	0	0	0	0	0	0	0	0	0	0
	0	0	0	0	0	0.1	0	0	0	0	0	0
	0	0	0	0	0	0	0	0	0	0	0	0
	0	0	0	0	0	0	0	0	0.1	0	0	0
	0	0	0	0	0	0	0	0	0	0	0	0
	0	0	0	0	0	0	0	0	0	0	0	0
	0	0	0	0	0	0	0	0	0	0	0	0
	0	0	0	0	0	0.1	0	0	0	0	0	0
	0	0	0	0	0	0	0	0	0.1	0	0	0
	0	0	0	0	0	0	0	0	0.1	0	0	0
	0	0	0	0	0	0	0	0	0	0	0	0
	0	0	0	0	0	0	0	0	0	0	0	0
	0	0	0	0	0	0	0	0	0.1	0	0	0
	0	0	0	0	0	0	0	0	0	0	0	0
	0	0	0	0	0	0.1	0	0	0	0	0	0.1
	0	0	0	0	0	0	0	0	0.1	0	0	0
	0	0	0	0	0	0	0	0	0	0	0	0
	0	0	0	0	0	0	0	0	0	0	0	0
	0	0	0	0	0	0	0	0	0	0	0	0
	0	0	0	0	0	0	0	0	0	0	0	0
	0	0	0	0	0	0	0	0	0	0	0	0
	0	0	0	0	0	0	0	0	0	0	0	0
	0	0	0	0	0	0	0	0	0	0	0	0
	0	0	0	0	0	0	0	0	0	0	0	0
	0	0	0	0	0	0	0	0	0	0	0	0
	0	0.1	0	0	0	0.1	0	0	0	0	0	0
	0	0	0	0	0	0	0	0	0	0	0	0
	0	0	0	0	0	0	0	0	0	0	0	0
	0	0	0	0	0	0	0	0	0	0	0	0
	0	0	0	0	0	0.1	0	0	0.1	0	0	0
	0	0	0	0	0	0	0	0	0.1	0	0	0.1
	0	0	0	0	0	0.1	0	0	0	0	0	0
	0	0	0	0	0	0	0	0	0	0	0	0
	0	0	0	0	0	0	0	0	0	0	0	0
	0	0	0	0	0	0	0	0	0	0	0	0
	0	0	0	0	0	0	0	0	0	0	0	0
	0	0	0	0	0	0	0	0	0	0	0	0
	0	0	0	0	0	0.1	0	0	0	0	0	0
	0	0	0	0	0	0	0	0	0.1	0	0	0
	0	0	0	0	0	0	0	0	0	0	0	0
	0	0	0	0	0	0	0	0	0	0	0	0
	0	0	0	0	0	0	0	0	0	0	0	0
	0	0	0	0	0	0	0	0	0	0	0	0
	0	0	0	0	0	0	0	0	0	0	0	0
	0	0	0	0	0	0	0	0	0	0	0	0
	0	0	0	0	0	0	0	0	0	0	0	0
	0	0	0	0	0	0	0	0	0	0	0	0
	0	0	0.1	0	0	0	0	0	0	0	0	0
	0	0	0	0	0	0	0	0	0.1	0	0	0
	0	0	0	0	0	0	0	0	0	0	0	0
	0	0	0	0	0	0	0	0	0	0	0	0.1
	0	0	0	0	0	0	0	0	0.1	0	0	0
	0	0	0	0	0	0.1	0	0	0	0	0	0
	0	0	0	0	0	0	0	0	0	0	0	0
	0	0	0	0	0	0	0	0	0	0	0	0
	0	0	0	0	0	0	0	0	0	0	0	0
	0	0	0	0	0	0	0	0	0	0.3	0.6	0
	0	0	0	0	0	0	0	0	0	0	0	0
	0	0	0	0	0	0	0	0	0	0	0	0
	0	0	0	0	0	0	0	0	0.1	0	0	0
	0	0	0	0	0	0.1	0	0	0	0	0	0.1
	0	0	0	0	0	0	0	0	0.1	0	0	0
	0	0	0	0	0	0	0	0	0	0	0	0.1
	0	0	0	0	0	0	0	0	0	0	0	0
	0	0	0	0	0	0	0	0	0	0	0	0
	0	0	0	0	0	0	0	0	0.1	0	0	0
	0	0	0	0	0	0	0	0	0	0	0	0
	0	0	0	0	0	0	0	0	0	0	0	0
	0	0	0	0	0	0.1	0	0	0	0	0	0
	0	0	0	0	0	0	0	0	0	0	0	0
	0	0	0	0	0	0	0	0	0.1	0	0	0
	0	0	0	0	0	0	0	0	0	0	0	0
	0	0	0	0	0	0	0	0	0	0	0	0
	0	0	0	0	0	0	0	0	0	0	0	0
	0	0	0	0	0	0	0	0	0	0	0	0
	0	0	0	0	0	0	0	0	0	0	0	0
	0	0	0	0	0	0	0	0	0.1	0	0	0
	0	0	0	0	0	0	0	0	0	0	0	0
	0	0	0	0	0	0	0	0	0	0	0	0
	0	0	0	0	0	0	0.2	0.5	0	0	0	0
	0	0	0	0	0	0	0	0	0.1	0	0	0
	0	0	0	0	0	0	0	0	0.1	0	0	0
	0	0	0	0	0	0	0	0	0.1	0	0	0
	0	0	0	0	0	0	0	0	0	0	0	0
	0	0	0	0	0	0	0	0	0.1	0	0	0
	0	0	0	0	0	0	0	0	0	0	0	0
	0	0	0	0	0	0	0	0	0.1	0	0	0
	0	0	0	0	0	0.1	0	0	0	0	0	0
	0	0	0	0	0	0	0	0	0	0	0	0
	0	0	0	0	0	0	0	0	0	0	0	0
	0	0	0	0	0	0.1	0	0	0	0	0	0
	0	0	0	0	0	0.1	0	0	0	0	0	0
	0	0	0	0	0	0	0	0	0.1	0	0	0
	0	0	0	0	0	0	0	0	0.1	0	0	0
	0	0	0	0	0	0	0	0	0	0	0	0
	0	0	0	0	0	0	0	0	0	0	0	0
	0	0	0	0	0	0	0	0	0.1	0	0	0
	0	0	0	0	0	0	0	0	0	0	0	0
	0	0	0	0	0	0	0	0	0.1	0	0	0
	0	0	0	0	0	0.1	0	0	0.1	0.4	0.5	0.1
	0	0	0	0	0	0.1	0	0	0	0	0	0
	0	0	0	0	0	0.1	0	0	0.1	0	0	0
	0	0	0	0	0	0	0	0	0	0	0	0
	0	0	0	0	0	0	0	0	0.1	0	0	0
	0	0	0	0	0	0	0	0	0	0	0	0
	0	0	0	0	0	0	0	0	0.1	0	0	0
	0	0	0	0	0	0.1	0	0	0	0	0	0
	0	0	0	0	0	0	0	0	0.1	0	0	0
	0	0	0	0	0	0	0	0	0	0	0	0.1
	0	0	0	0	0	0	0	0	0	0	0	0
	0	0	0	0	0	0	0	0	0	0	0	0
	0	0	0	0	0	0	0	0	0	0	0	0
	0	0	0	0	0	0.1	0	0	0	0	0	0
	0	0	0	0	0	0	0	0	0	0	0	0
	0	0	0	0	0	0	0	0	0.1	0	0	0
	0	0	0	0	0	0.1	0	0	0.1	0	0	0
	0	0	0	0	0	0.1	0	0	0.1	0	0	0
	0	0	0	0	0	0	0	0	0.1	0	0	0
	0	0	0	0	0	0	0	0	0.1	0	0	0
	0	0	0	0	0	0	0	0	0	0	0	0.1
	0	0	0	0	0	0	0	0	0	0	0	0
	0	0	0	0	0	0	0	0	0	0	0	0
	0	0	0	0	0	0	0	0	0.1	0	0	0
	0	0	0	0	0	0	0	0	0	0	0	0
	0	0	0	0	0	0	0	0	0	0	0	0
	0	0	0	0	0	0	0	0	0	0	0	0
	0	0	0	0	0	0	0	0	0	0	0	0
	0	0	0	0	0	0	0	0	0	0	0	0
	0	0	0	0	0	0	0	0	0.1	0	0	0
	0	0	0	0	0	0	0	0	0	0	0	0
	0	0	0	0	0	0	0	0	0	0	0	0.1
	0	0	0	0	0	0	0	0	0	0	0	0.1
	0	0	0	0	0	0	0	0	0.1	0	0	0
	0	0	0	0	0	0	0	0	0.1	0	0	0
	0	0	0	0	0	0	0	0	0	0	0	0
	0	0	0	0	0	0	0	0	0	0	0	0
	0	0	0	0	0	0	0	0	0	0	0	0
	0	0	0	0	0	0	0	0	0.1	0	0	0
	0	0	0	0	0	0	0	0	0	0	0	0
	0	0	0	0	0	0	0	0	0	0	0	0
	0	0	0	0	0	0.1	0	0	0	0	0	0
	0	0	0	0	0	0	0	0	0	0	0	0
	0	0	0	0	0	0	0	0	0	0	0	0
	0	0	0	0	0	0.1	0	0	0.1	0	0	0
	0	0	0	0	0	0	0	0	0.1	0	0	0
	0	0	0	0	0	0.1	0	0	0	0	0	0
	0	0	0	0	0	0.1	0	0	0	0	0	0
	0	0	0	0	0	0	0	0	0	0	0	0
	0	0	0	0	0	0	0	0	0	0	0	0
	0	0	0	0	0	0	0	0	0	0	0	0
	0	0	0	0	0	0	0	0	0	0	0	0
	0	0	0	0	0	0	0	0	0	0	0	0
	0	0	0	0	0	0.1	0	0	0	0	0	0
	0	0	0	0	0	0	0	0	0.1	0	0	0
	0	0	0	0	0	0	0	0	0	0	0	0
	0	0	0	0	0	0	0	0	0	0	0	0
	0	0	0	0	0	0	0	0	0	0	0	0
	0	0	0	0	0	0	0	0	0	0	0	0
	0	0	0	0	0	0	0	0	0	0	0	0
	0	0	0	0	0	0.1	0	0	0.1	0	0	0
	0	0	0	0	0	0	0	0	0	0	0	0
	0	0	0	0	0	0	0	0	0	0	0	0
	0	0	0	0	0	0.1	0	0	0	0	0	0
	0	0	0	0	0	0	0	0	0	0	0	0
	0	0	0	0	0	0.1	0	0	0	0	0	0.1
	0	0	0	0	0	0	0	0	0.1	0	0	0
	0	0	0	0	0	0	0	0	0	0	0	0
	0	0	0	0	0	0	0	0	0.1	0	0	0
	0	0	0.1	0	0	0	0	0	0	0	0	0
	0	0	0	0	0	0.1	0	0	0	0	0	0
	0	0	0	0	0	0.1	0	0	0	0	0	0
	0	0	0	0	0	0	0	0	0	0	0	0
	0	0	0	0	0	0	0	0	0	0	0	0
	0	0	0	0	0	0	0	0	0.1	0	0	0
	0	0	0	0	0	0.1	0	0	0	0	0	0
	0	0	0	0	0	0	0	0	0	0	0	0.1
	0	0	0	0	0	0	0	0	0	0	0	0
	0	0	0	0	0	0	0	0	0	0	0	0
	0	0	0	0	0	0	0	0	0	0	0	0
	0	0	0	0	0	0.1	0	0	0	0	0	0
	0	0	0	0	0	0	0	0	0	0	0	0.1
	0	0	0	0	0	0.1	0	0	0.1	0	0	0
	0	0	0	0	0	0	0	0	0.1	0	0	0
	0	0	0	0	0	0	0	0	0.1	0	0	0
	0	0	0	0	0	0	0	0	0.1	0	0	0
	0	0	0	0	0	0	0	0	0	0	0	0
	0	0	0.1	0	0	0	0	0	0	0	0	0
	0	0	0	0	0	0.1	0	0	0	0	0	0
	0	0	0	0	0	0	0	0	0.1	0	0	0
	0	0	0.1	0	0	0	0	0	0	0	0	0
	0	0	0	0	0	0	0	0	0.1	0	0	0
	0	0	0.1	0	0	0	0	0	0	0	0	0
	0	0	0	0	0	0	0	0	0	0	0	0
	0	0	0	0	0	0.1	0	0	0.1	0	0	0
	0	0	0	0	0	0.1	0	0	0	0	0	0
	0	0	0	0	0	0	0	0	0	0	0	0
	0	0	0	0	0	0.1	0	0	0.1	0	0	0
	0	0	0	0	0	0	0	0	0	0	0	0
	0	0	0	0	0	0	0	0	0	0	0	0
	0	0	0	0	0	0.1	0	0	0	0	0	0
	0	0	0	0	0	0.1	0	0	0	0	0	0
	0	0	0	0	0	0	0	0	0	0	0	0
	0	0	0	0	0	0	0	0	0	0	0	0
	0	0	0	0	0	0	0	0	0	0	0	0.1
	0	0	0	0	0	0	0	0	0	0	0	0
	0	0	0	0	0	0	0	0	0	0	0	0
	0	0	0	0	0	0	0	0	0	0	0	0
	0	0	0	0	0	0	0	0	0	0	0	0
	0	0	0	0	0	0	0	0	0	0	0	0
	0	0	0	0	0	0	0	0	0.1	0	0	0
	0	0	0	0	0	0	0	0	0	0	0	0
	0	0	0	0	0	0	0	0	0	0	0	0
	0	0	0.1	0	0	0.1	0	0	0	0	0	0
	0	0	0	0	0	0	0	0	0	0	0	0
	0	0	0	0	0	0	0	0	0	0	0	0
	0	0	0	0	0	0	0	0	0	0	0	0
	0	0	0	0	0	0	0	0.1	0.1	0	0	0
	0	0	0	0	0	0.1	0	0	0	0	0	0
	0	0	0	0	0	0.1	0	0	0	0	0	0
	0	0	0	0	0	0.1	0	0	0	0	0	0
	0	0	0	0	0	0	0	0	0	0	0	0
	0	0	0	0	0	0	0	0	0	0	0	0
	0	0	0	0	0	0	0	0	0	0	0	0
	0	0	0	0	0	0.1	0	0	0.1	0	0	0
	0	0	0	0	0	0	0	0	0	0	0	0
	0	0	0	0	0	0	0	0	0	0	0	0
	0	0	0	0	0	0	0	0	0	0	0	0
	0	0	0	0	0	0	0	0	0.1	0	0	0
	0	0	0	0	0	0.1	0	0	0.1	0	0	0.1
	0	0	0	0	0	0	0	0	0	0	0	0
	0	0	0	0	0	0.1	0	0	0	0	0	0
	0	0	0	0	0	0	0	0	0	0	0	0
	0	0	0	0	0	0.1	0	0	0	0	0	0
	0	0	0	0	0	0	0	0	0	0	0	0
	0	0	0	0	0	0	0	0	0	0	0	0
	0	0	0	0	0	0.1	0	0	0	0	0	0
	0	0	0	0	0	0	0	0	0	0	0	0
	0	0	0	0	0	0	0	0	0.1	0	0	0
	0	0	0	0	0	0	0	0	0.1	0	0	0
	0	0	0	0	0	0.1	0	0	0.1	0	0	0
	0	0	0	0	0	0	0	0	0	0	0	0
	0	0	0	0	0	0	0	0	0.1	0	0	0
	0	0	0.1	0	0	0	0	0	0.1	0	0	0
[truncated: 1,097 more rows]

## Sheet: broadleaf Blank
ug/m^3	4ms	1/8
PM	10	2.5	1	10	2.5	1	10	2.5	1	10	2.5	1		Total	PM10	1328
	0	0	0	0	0	0	0	0	0	0	0	0		26.2	6.3	9.3	63.5
	0	0	0	0	0	0	0	0	0	0.1	0.1	0.1
	0	0	0	0	0	0	0	0	0	0	0	0		26.325	13.143
	0	0	0	0	0	0	0	0	0	0.4	0.3	0
	0	0	0	0	0	0	0	0	0	0	0	0
	0	0	0	0	0	0	0	0	0	0	0	0
	0	0	0	0	0	0	0	0	0	0.1	0.1	0.1
	0	0	0	0	0	0	0	0	0	0	0	0
	0	0	0	0	0	0	0	0	0	0	0	0
	0	0	0	0	0	0	0	0	0	0	0	0
	0	0	0	0	0	0	0	0	0	0	0	0
	0.7	0.5	0	0	0	0	0	0	0	0	0	0
	0	0	0	0	0	0	0	0	0	0	0	0
	0	0	0	0	0	0	0	0	0	0	0	0
	0	0	0	0	0	0	0	0	0	0.1	0.1	0.1
	0	0	0	0	0	0	0	0	0	0	0	0
	0	0	0	0	0	0	0	0	0	0	0	0
	0	0	0	0	0	0	0	0	0	0	0	0
	0	0	0	0	0	0	0	0	0	0	0	0
	0	0	0	0	0	0	0	0	0	0	0	0
	0	0	0	0	0	0	0	0	0	0	0	0
	0	0	0	0	0	0	0	0	0	0	0	0
	0	0	0	0	0	0	0	0	0	0	0	0
	0	0	0	0	0	0	0	0	0	0	0	0
	0	0	0	0	0	0	0	0	0	0	0	0
	0	0	0	0	0	0	0	0	0	0	0	0
	0	0	0	0	0	0	0	0	0	0	0	0
	0.2	0.2	0	0	0	0	0	0	0	0	0	0
	0	0	0	0	0	0	0	0	0	0	0	0
	0	0	0	0	0	0	0	0	0	0	0	0
	0	0	0	0	0	0	0	0	0	0	0	0
	0	0	0	0	0	0	0	0	0	0	0	0
	0	0	0	0	0	0	0.1	0.1	0.1	0	0	0
	0	0	0	0	0	0	0	0	0	0	0	0
	0	0	0	0	0	0	0	0	0	0	0	0
	0	0	0	0	0	0	0	0	0	0	0	0
	0	0	0	0.1	0.1	0.1	0	0	0	0	0	0
	0.1	0.1	0.1	0	0	0	0	0	0	0	0	0
	0	0	0	0	0	0	0	0	0	0	0	0
	0	0	0	0.1	0.1	0.1	0	0	0	0	0	0
	0	0	0	0	0	0	0	0	0	0	0	0
	0	0	0	0	0	0	0	0	0	0	0	0
	0.1	0.1	0.1	0	0	0	0	0	0	0	0	0
	0	0	0	0	0	0	0	0	0	0	0	0
	0	0	0	0	0	0	0	0	0	0	0	0
	0	0	0	0	0	0	0	0	0	0	0	0
	0	0	0	0	0	0	0	0	0	0	0	0
	0	0	0	0	0	0	0	0	0	0	0	0
	0	0	0	0	0	0	0	0	0	0.1	0.1	0.1
	0	0	0	0.1	0.1	0.1	0	0	0	0.1	0.1	0.1
	0	0	0	0	0	0	0	0	0	0	0	0
	0	0	0	0	0	0	0	0	0	0.1	0.1	0
	0	0	0	0	0	0	0	0	0	0	0	0
	0	0	0	0	0	0	0.1	0.1	0.1	0	0	0
	0	0	0	0	0	0	0	0	0	0	0	0
	0	0	0	0	0	0	0	0	0	0	0	0
	0	0	0	0	0	0	0	0	0	0	0	0
	0.1	0.1	0	0	0	0	0.1	0.1	0.1	0	0	0
	0	0	0	0.7	0.6	0.1	0	0	0	0.1	0.1	0.1
	0	0	0	0	0	0	0	0	0	0	0	0
	0	0	0	0	0	0	0	0	0	0	0	0
	0	0	0	0	0	0	0	0	0	0	0	0
	0	0	0	0	0	0	0	0	0	0	0	0
	0	0	0	0	0	0	0	0	0	0	0	0
	0	0	0	0	0	0	0	0	0	0.1	0.1	0.1
	0.1	0.1	0.1	0	0	0	0	0	0	0	0	0
	0	0	0	0.1	0.1	0.1	0	0	0	0	0	0
	0.1	0.1	0.1	0	0	0	0	0	0	0	0	0
	0	0	0	0	0	0	0	0	0	0	0	0
	0	0	0	0.1	0.1	0.1	0	0	0	0	0	0
	0	0	0	0	0	0	0	0	0	0	0	0
	0	0	0	0.1	0.1	0.1	0	0	0	0	0	0
	0	0	0	0	0	0	0	0	0	0	0	0
	0	0	0	0	0	0	0	0	0	0	0	0
	0	0	0	0	0	0	0	0	0	0.1	0.1	0.1
	0	0	0	0	0	0	0	0	0	0	0	0
	0	0	0	0	0	0	0	0	0	0	0	0
	0	0	0	0	0	0	0	0	0	0.1	0.1	0.1
	0	0	0	0	0	0	0	0	0	0	0	0
	0	0	0	0	0	0	0	0	0	0	0	0
	0	0	0	0	0	0	0	0	0	0	0	0
	0	0	0	0	0	0	0	0	0	0	0	0
	0	0	0	0	0	0	0	0	0	0	0	0
	0	0	0	0	0	0	0	0	0	0	0	0
	0	0	0	0	0	0	0	0	0	0	0	0
	0.1	0.1	0.1	0	0	0	0	0	0	0	0	0
	0	0	0	0	0	0	0	0	0	0	0	0
	0	0	0	0	0	0	0	0	0	0	0	0
	0	0	0	0	0	0	0	0	0	0	0	0
	0	0	0	0	0	0	0	0	0	0	0	0
	0	0	0	0	0	0	0	0	0	0	0	0
	0	0	0	0	0	0	0	0	0	0	0	0
	0	0	0	0	0	0	0	0	0	0	0	0
	0	0	0	0	0	0	0	0	0	0	0	0
	0	0	0	0	0	0	0	0	0	0	0	0
	0	0	0	0	0	0	0	0	0	0.1	0.1	0.1
	0	0	0	0	0	0	0	0	0	0.1	0.1	0.1
	0	0	0	0	0	0	0	0	0	0	0	0
	0	0	0	0	0	0	0	0	0	0	0	0
	0	0	0	0	0	0	0	0	0	0	0	0
	0	0	0	0	0	0	0	0	0	0	0	0
	0	0	0	0	0	0	0	0	0	0	0	0
	0	0	0	0	0	0	0.1	0.1	0.1	0	0	0
	0	0	0	0	0	0	0	0	0	0	0	0
	0.1	0.1	0.1	0.1	0.1	0.1	0	0	0	0	0	0
	0	0	0	0	0	0	0	0	0	0	0	0
	0	0	0	0	0	0	0.1	0.1	0.1	0	0	0
	0	0	0	0	0	0	0	0	0	0	0	0
	0	0	0	0	0	0	0.1	0.1	0.1	0	0	0
	0	0	0	0.1	0.1	0.1	0	0	0	0	0	0
	0	0	0	0	0	0	0	0	0	0	0	0
	0	0	0	0	0	0	0	0	0	0	0	0
	0	0	0	0	0	0	0.1	0.1	0	0.1	0.1	0.1
	0.1	0.1	0.1	0	0	0	0	0	0	0	0	0
	0	0	0	0	0	0	0	0	0	0.1	0.1	0.1
	0.1	0.1	0.1	0	0	0	0	0	0	0	0	0
	0	0	0	0	0	0	0	0	0	0	0	0
	0.1	0.1	0.1	0	0	0	0	0	0	0	0	0
	0	0	0	0	0	0	0	0	0	0	0	0
	0	0	0	0	0	0	0	0	0	0	0	0
	0	0	0	0	0	0	0	0	0	0.1	0.1	0.1
	0	0	0	0	0	0	0	0	0	0	0	0
	0	0	0	0	0	0	0	0	0	0	0	0
	0	0	0	0	0	0	0	0	0	0	0	0
	0	0	0	0	0	0	0	0	0	0	0	0
	0	0	0	0	0	0	0	0	0	0	0	0
	0	0	0	0	0	0	0	0	0	0	0	0
	0.1	0.1	0.1	0	0	0	0	0	0	0	0	0
	0	0	0	0	0	0	0	0	0	0	0	0
	0	0	0	0	0	0	0	0	0	0	0	0
	0	0	0	0	0	0	0	0	0	0	0	0
	0	0	0	0	0	0	0	0	0	0	0	0
	0	0	0	0	0	0	0	0	0	0	0	0
	0.1	0.1	0.1	0	0	0	0	0	0	0.1	0.1	0.1
	0	0	0	0	0	0	0	0	0	0	0	0
	0	0	0	0	0	0	0	0	0	0	0	0
	0	0	0	0	0	0	0	0	0	0	0	0
	0.1	0.1	0.1	0	0	0	0	0	0	0	0	0
	0	0	0	0	0	0	0	0	0	0	0	0
	0	0	0	0	0	0	0	0	0	0	0	0
	0	0	0	0	0	0	0	0	0	0	0	0
	0	0	0	0.1	0.1	0.1	0	0	0	0	0	0
	0	0	0	0	0	0	0	0	0	0	0	0
	0	0	0	0	0	0	0	0	0	0	0	0
	0	0	0	0	0	0	0	0	0	0	0	0
	0.1	0.1	0.1	0	0	0	0	0	0	0	0	0
	0	0	0	0	0	0	0	0	0	0	0	0
	0	0	0	0	0	0	0	0	0	0	0	0
	0	0	0	0	0	0	0.1	0.1	0.1	0	0	0
	0	0	0	0	0	0	0	0	0	0	0	0
	0	0	0	0	0	0	0	0	0	0.1	0.1	0.1
	0	0	0	0	0	0	0	0	0	0	0	0
	0	0	0	0	0	0	0	0	0	0	0	0
	0	0	0	0	0	0	0	0	0	0	0	0
	0	0	0	0	0	0	0	0	0	0	0	0
	0	0	0	0	0	0	0	0	0	0	0	0
	0	0	0	0	0	0	0	0	0	0	0	0
	0	0	0	0	0	0	0	0	0	0	0	0
	0	0	0	0	0	0	0	0	0	0	0	0
	0.1	0.1	0.1	0	0	0	0	0	0	0	0	0
	0	0	0	0	0	0	0	0	0	0	0	0
	0	0	0	0	0	0	0	0	0	0	0	0
	0	0	0	0	0	0	0	0	0	0	0	0
	0	0	0	0	0	0	0.1	0.1	0.1	0	0	0
	0	0	0	0	0	0	0	0	0	0	0	0
	0	0	0	0	0	0	0	0	0	0	0	0
	0	0	0	0	0	0	0	0	0	0	0	0
	0	0	0	0	0	0	0	0	0	0	0	0
	0	0	0	0	0	0	0	0	0	0	0	0
	0	0	0	0	0	0	0	0	0	0	0	0
	0	0	0	0	0	0	0	0	0	0	0	0
	0	0	0	0	0	0	0	0	0	0	0	0
	0	0	0	0.1	0.1	0.1	0	0	0	0	0	0
	0	0	0	0	0	0	0	0	0	0	0	0
	0	0	0	0	0	0	0	0	0	0	0	0
	0	0	0	0	0	0	0	0	0	0	0	0
	0.1	0.1	0.1	0	0	0	0	0	0	0	0	0
	0	0	0	0	0	0	0	0	0	0	0	0
	0	0	0	0	0	0	0.1	0.1	0.1	0	0	0
	0	0	0	0	0	0	0	0	0	0.1	0.1	0.1
	0	0	0	0	0	0	0	0	0	0	0	0
	0	0	0	0	0	0	0	0	0	0	0	0
	0	0	0	0	0	0	0	0	0	0.1	0.1	0.1
	0	0	0	0	0	0	0	0	0	0.1	0.1	0.1
	0.1	0.1	0.1	0	0	0	0	0	0	0	0	0
	0	0	0	0	0	0	0	0	0	0	0	0
	0	0	0	0	0	0	0	0	0	0.1	0.1	0.1
	0	0	0	0	0	0	0	0	0	0	0	0
	0.1	0.1	0.1	0	0	0	0	0	0	0	0	0
	0	0	0	0	0	0	0	0	0	0	0	0
	0	0	0	0	0	0	0	0	0	0	0	0
	0	0	0	0	0	0	0	0	0	0	0	0
	0	0	0	0	0	0	0	0	0	0	0	0
	0	0	0	0	0	0	0	0	0	0.1	0.1	0.1
	0	0	0	0	0	0	0	0	0	0	0	0
	0	0	0	0	0	0	0	0	0	0	0	0
	0	0	0	0	0	0	0	0	0	0	0	0
	0	0	0	0	0	0	0	0	0	0	0	0
	0	0	0	0	0	0	0	0	0	0	0	0
	0	0	0	0	0	0	0	0	0	0	0	0
	0	0	0	0	0	0	0	0	0	0	0	0
	0	0	0	0	0	0	0.1	0.1	0	0.1	0.1	0.1
	0	0	0	0	0	0	0	0	0	0	0	0
	0	0	0	0	0	0	0	0	0	0	0	0
	0	0	0	0	0	0	0	0	0	0	0	0
	0	0	0	0	0	0	0	0	0	0	0	0
	0	0	0	0	0	0	0	0	0	0	0	0
	0	0	0	0	0	0	0	0	0	0	0	0
	0	0	0	0	0	0	0	0	0	0.1	0.1	0.1
	0	0	0	0	0	0	0	0	0	0.1	0.1	0.1
	0	0	0	0	0	0	0	0	0	0	0	0
	0	0	0	0	0	0	0	0	0	0	0	0
	0	0	0	0	0	0	0	0	0	0.1	0.1	0.1
	0	0	0	0	0	0	0	0	0	0	0	0
	0	0	0	0	0	0	0	0	0	0	0	0
	0	0	0	0	0	0	0	0	0	0	0	0
	0	0	0	0	0	0	0	0	0	0	0	0
	0	0	0	0	0	0	0	0	0	0.1	0.1	0.1
	0	0	0	0	0	0	0	0	0	0.1	0.1	0.1
	0	0	0	0	0	0	0	0	0	0	0	0
	0	0	0	0	0	0	0.1	0.1	0.1	0	0	0
	0	0	0	0	0	0	0	0	0	0	0	0
	0.1	0.1	0.1	0	0	0	0	0	0	0	0	0
	0.1	0.1	0.1	0	0	0	0	0	0	0.1	0.1	0.1
	0	0	0	0	0	0	0	0	0	0	0	0
	0	0	0	0.1	0.1	0.1	0	0	0	0	0	0
	0	0	0	0	0	0	0	0	0	0	0	0
	0	0	0	0	0	0	0	0	0	0	0	0
	0	0	0	0	0	0	0	0	0	0	0	0
	0	0	0	0	0	0	0	0	0	0	0	0
	0	0	0	0	0	0	0	0	0	0	0	0
	0	0	0	0	0	0	0	0	0	0	0	0
	0	0	0	0	0	0	0.1	0.1	0.1	0	0	0
	0	0	0	0	0	0	0	0	0	0.1	0.1	0.1
	0	0	0	0	0	0	0	0	0	0	0	0
	0	0	0	0	0	0	0	0	0	0	0	0
	0	0	0	0	0	0	0	0	0	0.1	0.1	0.1
	0.1	0.1	0.1	0	0	0	0	0	0	0	0	0
	0	0	0	0	0	0	0	0	0	0.1	0.1	0.1
	0	0	0	0	0	0	0	0	0	0	0	0
	0	0	0	0	0	0	0	0	0	0	0	0
	0	0	0	0	0	0	0	0	0	0	0	0
	0	0	0	0	0	0	0	0	0	0	0	0
	0	0	0	0	0	0	0	0	0	0.1	0.1	0.1
	0.1	0.1	0.1	0	0	0	0	0	0	0	0	0
	0.1	0.1	0.1	0	0	0	0	0	0	0	0	0
	0	0	0	0	0	0	0	0	0	0	0	0
	0	0	0	0	0	0	0	0	0	0.1	0.1	0.1
	0	0	0	0	0	0	0	0	0	0.1	0.1	0.1
	0	0	0	0	0	0	0	0	0	0	0	0
	0	0	0	0	0	0	0	0	0	0	0	0
	0	0	0	0	0	0	0	0	0	0	0	0
	0	0	0	0	0	0	0	0	0	0	0	0
	0	0	0	0	0	0	0	0	0	0	0	0
	0	0	0	0	0	0	0	0	0	0	0	0
	0	0	0	0	0	0	0	0	0	0	0	0
	0	0	0	0	0	0	0	0	0	0	0	0
	0	0	0	0	0	0	0	0	0	0.1	0.1	0.1
	0.1	0.1	0.1	0	0	0	0	0	0	0.1	0.1	0.1
	0.1	0.1	0.1	0.1	0.1	0.1	0	0	0	0.1	0.1	0.1
	0	0	0	0	0	0	0	0	0	0	0	0
	0	0	0	0	0	0	0	0	0	0	0	0
	0	0	0	0	0	0	0	0	0	0	0	0
	0	0	0	0	0	0	0	0	0	0.1	0.1	0.1
	0	0	0	0	0	0	0	0	0	0	0	0
	0.1	0.1	0.1	0	0	0	0.1	0.1	0.1	0.1	0.1	0.1
	0	0	0	0	0	0	0	0	0	0	0	0
	0	0	0	0	0	0	0	0	0	0	0	0
	0	0	0	0	0	0	0	0	0	0	0	0
	0	0	0	0	0	0	0	0	0	0	0	0
	0	0	0	0	0	0	0	0	0	0.1	0.1	0.1
	0	0	0	0	0	0	0	0	0	0	0	0
	0	0	0	0	0	0	0	0	0	0.1	0.1	0.1
	0	0	0	0	0	0	0	0	0	0	0	0
	0	0	0	0	0	0	0	0	0	0	0	0
	0	0	0	0	0	0	0	0	0	0	0	0
	0	0	0	0	0	0	0	0	0	0.1	0.1	0.1
	0	0	0	0	0	0	0.1	0.1	0.1	0	0	0
	0	0	0	0	0	0	0	0	0	0	0	0
	0	0	0	0	0	0	0	0	0	0	0	0
	0	0	0	0	0	0	0	0	0	0	0	0
	0	0	0	0	0	0	0.1	0.1	0.1	0	0	0
	0	0	0	0	0	0	0	0	0	0.1	0.1	0.1
	0	0	0	0	0	0	0	0	0	0.1	0.1	0.1
	0	0	0	0	0	0	0	0	0	0	0	0
	0.1	0.1	0.1	0	0	0	0	0	0	0	0	0
	0	0	0	0	0	0	0	0	0	0	0	0
	0	0	0	0	0	0	0	0	0	0	0	0
	0	0	0	0	0	0	0	0	0	0	0	0
	0	0	0	0	0	0	0	0	0	0	0	0
	0	0	0	0	0	0	0	0	0	0	0	0
	0	0	0	0	0	0	0	0	0	0.1	0.1	0.1
	0	0	0	0	0	0	0	0	0	0.1	0.1	0.1
	0	0	0	0	0	0	0	0	0	0	0	0
	0.1	0.1	0.1	0	0	0	0	0	0	0.1	0.1	0.1
	0	0	0	0	0	0	0	0	0	0.1	0.1	0.1
	0	0	0	0	0	0	0	0	0	0	0	0
	0	0	0	0	0	0	0	0	0	0	0	0
	0.1	0.1	0.1	0	0	0	0	0	0	0	0	0
	0	0	0	0	0	0	0	0	0	0	0	0
	0	0	0	0	0	0	0	0	0	0	0	0
	0.1	0.1	0.1	0	0	0	0	0	0	0	0	0
	0	0	0	0	0	0	0	0	0	0	0	0
	0	0	0	0	0	0	0	0	0	0	0	0
	0	0	0	0	0	0	0	0	0	0.1	0.1	0.1
	0	0	0	0	0	0	0	0	0	0	0	0
	0	0	0	0	0	0	0	0	0	0	0	0
	0	0	0	0	0	0	0	0	0	0.1	0.1	0.1
	0	0	0	0	0	0	0	0	0	0	0	0
	0	0	0	0	0	0	0	0	0	0.1	0.1	0.1
	0	0	0	0	0	0	0.1	0.1	0	0	0	0
	0	0	0	0	0	0	0	0	0	0	0	0
	0	0	0	0	0	0	0	0	0	0	0	0
	0	0	0	0	0	0	0	0	0	0	0	0
	0.1	0.1	0.1	0	0	0	0	0	0	0	0	0
	0	0	0	0	0	0	0	0	0	0	0	0
	0.1	0.1	0.1	0	0	0	0	0	0	0	0	0
	0	0	0	0	0	0	0	0	0	0	0	0
	0.1	0.1	0.1	0	0	0	0	0	0	0	0	0
	0	0	0	0	0	0	0	0	0	0	0	0
	0	0	0	0	0	0	0	0	0	0.1	0.1	0.1
	0	0	0	0	0	0	0	0	0	0	0	0
	0	0	0	0	0	0	0	0	0	0.1	0.1	0.1
	0	0	0	0	0	0	0	0	0	0	0	0
	0	0	0	0	0	0	0	0	0	0	0	0
	0	0	0	0	0	0	0	0	0	0	0	0
	0	0	0	0	0	0	0	0	0	0	0	0
	0	0	0	0	0	0	0	0	0	0	0	0
	0	0	0	0	0	0	0	0	0	0.1	0.1	0.1
	0	0	0	0	0	0	0	0	0	0	0	0
	0	0	0	0	0	0	0	0	0	0	0	0
	0	0	0	0	0	0	0	0	0	0.1	0.1	0.1
	0	0	0	0	0	0	0	0	0	0.1	0.1	0.1
	0.1	0.1	0.1	0	0	0	0	0	0	0	0	0
	0	0	0	0	0	0	0	0	0	0	0	0
	0	0	0	0	0	0	0	0	0	0	0	0
	0	0	0	0	0	0	0	0	0	0.1	0.1	0.1
	0	0	0	0	0	0	0	0	0	0.1	0.1	0.1
	0.1	0.1	0.1	0	0	0	0	0	0	0.1	0.1	0.1
	0	0	0	0	0	0	0	0	0	0	0	0
	0	0	0	0	0	0	0.1	0.1	0.1	0	0	0
	0	0	0	0	0	0	0	0	0	0	0	0
	0	0	0	0	0	0	0	0	0	0.1	0.1	0.1
	0.1	0.1	0.1	0	0	0	0	0	0	0	0	0
	0	0	0	0	0	0	0	0	0	0.1	0.1	0.1
	0	0	0	0	0	0	0	0	0	0.1	0.1	0.1
	0.1	0.1	0.1	0	0	0	0	0	0	0	0	0
	0	0	0	0	0	0	0	0	0	0	0	0
	0	0	0	0	0	0	0.1	0.1	0.1	0	0	0
	0	0	0	0	0	0	0	0	0	0	0	0
	0	0	0	0	0	0	0	0	0	0	0	0
	0	0	0	0	0	0	0	0	0	0.1	0.1	0.1
	0	0	0	0	0	0	0	0	0	0.1	0.1	0.1
	0	0	0	0	0	0	0	0	0	0	0	0
	0	0	0	0	0	0	0	0	0	0.1	0.1	0.1
	0.1	0.1	0.1	0	0	0	0	0	0	0	0	0
	0.1	0.1	0.1	0	0	0	0	0	0	0	0	0
	0	0	0	0	0	0	0	0	0	0.1	0.1	0.1
	0.1	0.1	0.1	0	0	0	0	0	0	0.1	0.1	0.1
	0	0	0	0	0	0	0	0	0	0.1	0.1	0.1
	0.1	0.1	0.1	0	0	0	0	0	0	0	0	0
	0.1	0.1	0.1	0	0	0	0	0	0	0	0	0
	0.1	0.1	0.1	0	0	0	0	0	0	0.1	0.1	0.1
	0	0	0	0	0	0	0	0	0	0	0	0
	0	0	0	0	0	0	0	0	0	0.1	0.1	0.1
	0	0	0	0	0	0	0	0	0	0	0	0
	0	0	0	0	0	0	0	0	0	0	0	0
	0	0	0	0.1	0.1	0.1	0	0	0	0.1	0.1	0.1
	0	0	0	0	0	0	0	0	0	0	0	0
	0	0	0	0	0	0	0	0	0	0	0	0
	0	0	0	0	0	0	0	0	0	0.1	0.1	0.1
	0	0	0	0	0	0	0	0	0	0	0	0
	0	0	0	0	0	0	0	0	0	0	0	0
	0	0	0	0	0	0	0	0	0	0	0	0
	0	0	0	0	0	0	0	0	0	0	0	0
	0.1	0.1	0.1	0	0	0	0	0	0	0	0	0
	0	0	0	0	0	0	0	0	0	0.1	0.1	0.1
	0	0	0	0	0	0	0	0	0	0	0	0
	0	0	0	0.1	0.1	0.1	0	0	0	0	0	0
	0	0	0	0	0	0	0	0	0	0	0	0
	0	0	0	0	0	0	0	0	0	0.1	0.1	0.1
	0.1	0.1	0.1	0	0	0	0	0	0	0	0	0
	0	0	0	0	0	0	0	0	0	0	0	0
	0	0	0	0	0	0	0	0	0	0	0	0
	0	0	0	0	0	0	0	0	0	0	0	0
	0	0	0	0	0	0	0	0	0	0	0	0
	0	0	0	0	0	0	0	0	0	0.1	0.1	0.1
	0	0	0	0	0	0	0	0	0	0	0	0
	0	0	0	0	0	0	0	0	0	0.1	0.1	0.1
	0	0	0	0	0	0	0	0	0	0.1	0.1	0.1
	0	0	0	0	0	0	0	0	0	0	0	0
	0	0	0	0	0	0	0	0	0	0	0	0
	0	0	0	0	0	0	0.1	0.1	0	0.1	0.1	0.1
	0.1	0.1	0.1	0	0	0	0	0	0	0	0	0
	0	0	0	0	0	0	0	0	0	0	0	0
	0	0	0	0	0	0	0	0	0	0	0	0
	0.1	0.1	0.1	0	0	0	0	0	0	0	0	0
	0.1	0.1	0.1	0	0	0	0	0	0	0	0	0
	0.1	0.1	0.1	0	0	0	0	0	0	0.1	0.1	0.1
	0	0	0	0	0	0	0	0	0	0.1	0.1	0.1
	0.1	0.1	0.1	0	0	0	0	0	0	0.1	0.1	0.1
	0	0	0	0	0	0	0	0	0	0.1	0.1	0.1
	0.1	0.1	0.1	0	0	0	0.1	0.1	0.1	0.1	0.1	0.1
	0	0	0	0	0	0	0	0	0	0	0	0
	0	0	0	0	0	0	0	0	0	0	0	0
	0	0	0	0	0	0	0	0	0	0.1	0.1	0.1
	0	0	0	0	0	0	0	0	0	0	0	0
	0	0	0	0	0	0	0	0	0	0	0	0
	0.1	0.1	0.1	0	0	0	0	0	0	0.1	0.1	0.1
	0	0	0	0	0	0	0	0	0	0	0	0
	0.1	0.1	0.1	0	0	0	0	0	0	0	0	0
	0	0	0	0	0	0	0	0	0	0.1	0.1	0.1
	0.1	0.1	0.1	0	0	0	0	0	0	0	0	0
	0	0	0	0	0	0	0	0	0	0	0	0
	0	0	0	0	0	0	0	0	0	0	0	0
	0	0	0	0	0	0	0	0	0	0	0	0
	0	0	0	0	0	0	0	0	0	0.1	0.1	0.1
	0.1	0.1	0.1	0	0	0	0	0	0	0.1	0.1	0.1
	0	0	0	0	0	0	0	0	0	0	0	0
	0.1	0.1	0.1	0	0	0	0	0	0	0	0	0
	0	0	0	0	0	0	0	0	0	0	0	0
	0.1	0.1	0.1	0	0	0	0	0	0	0.1	0.1	0.1
	0	0	0	0	0	0	0	0	0	0.1	0.1	0.1
	0.1	0.1	0.1	0	0	0	0	0	0	0	0	0
	0.1	0.1	0.1	0	0	0	0.1	0.1	0.1	0.1	0.1	0.1
	0	0	0	0.1	0.1	0.1	0	0	0	0.1	0.1	0.1
	0.1	0.1	0.1	0	0	0	0	0	0	0	0	0
	0	0	0	0	0	0	0	0	0	0.1	0.1	0.1
	0	0	0	0	0	0	0	0	0	0.1	0.1	0.1
	0	0	0	0	0	0	0	0	0	0	0	0
	0.1	0.1	0.1	0	0	0	0	0	0	0.1	0.1	0.1
	0.1	0.1	0.1	0	0	0	0	0	0	0	0	0
	0	0	0	0	0	0	0	0	0	0	0	0
	0	0	0	0	0	0	0	0	0	0	0	0
	0	0	0	0	0	0	0	0	0	0	0	0
	0	0	0	0	0	0	0	0	0	0	0	0
	0	0	0	0	0	0	0	0	0	0.1	0.1	0.1
	0.1	0.1	0.1	0	0	0	0	0	0	0	0	0
	0	0	0	0	0	0	0	0	0	0.1	0.1	0.1
	0.1	0.1	0.1	0	0	0	0	0	0	0	0	0
	0.1	0.1	0.1	0	0	0	0	0	0	0	0	0
	0	0	0	0	0	0	0	0	0	0	0	0
	0	0	0	0	0	0	0	0	0	0.1	0.1	0.1
	0.1	0.1	0.1	0	0	0	0	0	0	0.1	0.1	0.1
	0	0	0	0	0	0	0	0	0	0	0	0
	0	0	0	0	0	0	0	0	0	0.1	0.1	0.1
	0.1	0.1	0.1	0	0	0	0	0	0	0	0	0
	0	0	0	0	0	0	0	0	0	0.1	0.1	0.1
	0.1	0.1	0.1	0	0	0	0	0	0	0	0	0
	0	0	0	0	0	0	0	0	0	0	0	0
	0.1	0.1	0.1	0	0	0	0	0	0	0	0	0
	0.1	0.1	0.1	0	0	0	0.9	0.6	0	0	0	0
	0.1	0.1	0.1	0	0	0	0	0	0	0	0	0
	0	0	0	0	0	0	0.1	0.1	0.1	0	0	0
	0	0	0	0	0	0	0	0	0	0	0	0
	0.1	0.1	0.1	0	0	0	0	0	0	0	0	0
	0.1	0.1	0.1	0	0	0	0	0	0	0	0	0
	0.1	0.1	0.1	0	0	0	0	0	0	0.1	0.1	0.1
	0.1	0.1	0.1	0.1	0.1	0.1	0	0	0	0	0	0
	0.1	0.1	0.1	0	0	0	0	0	0	0.1	0.1	0.1
	0	0	0	0	0	0	0	0	0	0.1	0.1	0.1
	0	0	0	0	0	0	0.1	0.1	0.1	0.1	0.1	0.1
	0	0	0	0	0	0	0	0	0	0	0	0
	0.1	0.1	0.1	0	0	0	0	0	0	0	0	0
	0	0	0	0	0	0	0	0	0	0.1	0.1	0.1
	0	0	0	0	0	0	0	0	0	0	0	0
	0	0	0	0	0	0	0	0	0	0	0	0
	0	0	0	0	0	0	0	0	0	0	0	0
	0	0	0	0	0	0	0	0	0	0	0	0
	0	0	0	0	0	0	0	0	0	0	0	0
	0.1	0.1	0.1	0.2	0.2	0.1	0	0	0	0	0	0
	0	0	0	0	0	0	0	0	0	0	0	0
	0	0	0	0	0	0	0	0	0	0.1	0.1	0.1
	0.1	0.1	0.1	0	0	0	0	0	0	0.1	0.1	0.1
	0.1	0.1	0.1	0	0	0	0	0	0	0	0	0
	0	0	0	0	0	0	0	0	0	0.1	0.1	0.1
	0.1	0.1	0.1	0	0	0	0	0	0	0.1	0.1	0.1
	0	0	0	0	0	0	0	0	0	0	0	0
	0	0	0	0	0	0	0	0	0	0	0	0
	0	0	0	0	0	0	0	0	0	0.1	0.1	0.1
	0	0	0	0	0	0	0	0	0	0	0	0
	0	0	0	0	0	0	0	0	0	0.1	0.1	0.1
	0	0	0	0	0	0	0	0	0	0	0	0
	0.1	0.1	0.1	0	0	0	0	0	0	0	0	0
	0	0	0	0	0	0	0	0	0	0.1	0.1	0.1
	0	0	0	0	0	0	0	0	0	0	0	0
	0	0	0	0	0	0	0	0	0	0	0	0
	0.1	0.1	0.1	0.1	0.1	0.1	0	0	0	0.1	0.1	0.1
	0	0	0	0.1	0.1	0.1	0	0	0	0	0	0
	0.1	0.1	0.1	0	0	0	0	0	0	0.1	0.1	0.1
	0.1	0.1	0.1	0	0	0	0	0	0	0	0	0
	0	0	0	0	0	0	0	0	0	0	0	0
	0	0	0	0	0	0	0	0	0	0.1	0.1	0.1
	0	0	0	0	0	0	0	0	0	0.4	0.4	0.1
	0	0	0	0	0	0	0	0	0	0.1	0.1	0.1
	0	0	0	0	0	0	0	0	0	0	0	0
	0	0	0	0	0	0	0	0	0	0.1	0.1	0.1
	0	0	0	0	0	0	0	0	0	0.1	0.1	0.1
	0	0	0	0	0	0	0	0	0	0.3	0.2	0.1
	0	0	0	0	0	0	0	0	0	0	0	0
	0.1	0.1	0.1	0	0	0	0	0	0	0	0	0
	0.1	0.1	0.1	0	0	0	0	0	0	0.1	0.1	0.1
	0.1	0.1	0.1	0.1	0.1	0.1	0	0	0	0	0	0
	0.1	0.1	0.1	0	0	0	0	0	0	0	0	0
	0	0	0	0	0	0	0	0	0	0	0	0
	0	0	0	0	0	0	0	0	0	0	0	0
	0	0	0	0	0	0	0	0	0	0.1	0.1	0.1
	0.1	0.1	0.1	0	0	0	0	0	0	0	0	0
	0.1	0.1	0.1	0	0	0	0	0	0	0.1	0.1	0.1
	0	0	0	0	0	0	0	0	0	0	0	0
	0	0	0	0	0	0	0	0	0	0	0	0
	0.1	0.1	0.1	0.1	0.1	0.1	0	0	0	0.1	0.1	0.1
	0.1	0.1	0.1	0	0	0	0	0	0	0	0	0
	0.1	0.1	0.1	0.1	0.1	0.1	0	0	0	0.1	0.1	0.1
	0.1	0.1	0.1	0	0	0	0	0	0	0	0	0
	0	0	0	0.1	0.1	0.1	0	0	0	0.1	0.1	0.1
	0	0	0	0	0	0	0	0	0	0	0	0
	0.1	0.1	0.1	0	0	0	0	0	0	0	0	0
	0.1	0.1	0.1	0	0	0	0	0	0	0.1	0.1	0.1
	0.1	0.1	0.1	0	0	0	0	0	0	0.1	0.1	0.1
	0.1	0.1	0.1	0	0	0	0	0	0	0.1	0.1	0.1
	0.1	0.1	0.1	0	0	0	0	0	0	0	0	0
	0	0	0	0	0	0	0	0	0	0	0	0
	0.1	0.1	0.1	0	0	0	0	0	0	0	0	0
	0	0	0	0	0	0	0	0	0	0	0	0
	0	0	0	0	0	0	0	0	0	0	0	0
	0	0	0	0.1	0.1	0.1	0	0	0	0	0	0
	0.1	0.1	0.1	0	0	0	0	0	0	0.1	0.1	0.1
	0.1	0.1	0.1	0	0	0	0	0	0	0.1	0.1	0.1
	0.1	0.1	0.1	0	0	0	0	0	0	0.1	0.1	0.1
	0	0	0	0	0	0	0	0	0	0.1	0.1	0.1
	0.1	0.1	0.1	0	0	0	0.2	0.2	0.1	0.1	0.1	0.1
	0.1	0.1	0.1	0	0	0	0	0	0	0	0	0
	0	0	0	0.1	0.1	0.1	0	0	0	0	0	0
	0	0	0	0	0	0	0	0	0	0.1	0.1	0.1
	0.1	0.1	0.1	0.1	0.1	0.1	0	0	0	0	0	0
	0.1	0.1	0.1	0	0	0	0	0	0	0	0	0
	0	0	0	0	0	0	0	0	0	0	0	0
	0	0	0	0	0	0	0	0	0	0	0	0
	0.1	0.1	0.1	0	0	0	0	0	0	0	0	0
	0.1	0.1	0.1	0	0	0	0	0	0	0.1	0.1	0.1
	0.1	0.1	0.1	0	0	0	0	0	0	0.1	0.1	0.1
	0	0	0	0	0	0	0	0	0	0	0	0
	0	0	0	0	0	0	0	0	0	0	0	0
	0	0	0	0	0	0	0	0	0	0.1	0.1	0.1
	0	0	0	0	0	0	0	0	0	0.1	0.1	0.1
	0	0	0	0	0	0	0	0	0	0.1	0.1	0.1
	0.1	0.1	0.1	0	0	0	0	0	0	0	0	0
	0	0	0	0	0	0	0	0	0	0.1	0.1	0.1
	0.1	0.1	0.1	0	0	0	0	0	0	0.1	0.1	0.1
	0.1	0.1	0.1	0.1	0.1	0.1	0	0	0	0	0	0
	0	0	0	0	0	0	0	0	0	0.1	0.1	0.1
	0.1	0.1	0.1	0	0	0	0	0	0	0.1	0.1	0.1
	0	0	0	0	0	0	0	0	0	0.1	0.1	0.1
	0.1	0.1	0.1	0	0	0	0	0	0	0	0	0
	0	0	0	0	0	0	0	0	0	0.1	0.1	0.1
	0	0	0	0.1	0.1	0.1	0	0	0	0	0	0
	0	0	0	0	0	0	0	0	0	0	0	0
	0.1	0.1	0.1	0.1	0.1	0.1	0	0	0	0	0	0
	0	0	0	0	0	0	0	0	0	0.1	0.1	0.1
	0	0	0	0	0	0	0	0	0	0.1	0.1	0.1
	0	0	0	0	0	0	0	0	0	0	0	0
	0	0	0	0	0	0	0	0	0	0.1	0.1	0.1
	0.1	0.1	0.1	0	0	0	0	0	0	0	0	0
	0	0	0	0	0	0	0	0	0	0.1	0.1	0.1
	0	0	0	0.9	0.6	0	0	0	0	0.1	0.1	0.1
	0.1	0.1	0.1	0	0	0	0	0	0	0.1	0.1	0.1
	0	0	0	0	0	0	0	0	0	0.1	0.1	0.1
	0	0	0	0	0	0	0	0	0	0.1	0.1	0.1
	0.1	0.1	0.1	0	0	0	0	0	0	0.1	0.1	0.1
	0.1	0.1	0.1	0	0	0	0	0	0	0.1	0.1	0.1
	0	0	0	0	0	0	0	0	0	0	0	0
	0.1	0.1	0.1	0	0	0	0	0	0	0	0	0
	0	0	0	0	0	0	0	0	0	0.1	0.1	0.1
	0	0	0	0	0	0	0	0	0	0	0	0
	0.1	0.1	0.1	0	0	0	0	0	0	0.1	0.1	0.1
	0.1	0.1	0.1	0	0	0	0	0	0	0	0	0
	0.1	0.1	0.1	0	0	0	0.1	0.1	0.1	0	0	0
	0	0	0	0	0	0	0	0	0	0.1	0.1	0.1
	0.1	0.1	0.1	0	0	0	0	0	0	0	0	0
	0	0	0	0	0	0	0	0	0	0.1	0.1	0.1
	0.1	0.1	0.1	0	0	0	0	0	0	0	0	0
	0	0	0	0	0	0	0	0	0	0	0	0
	0.1	0.1	0.1	0	0	0	0	0	0	0.1	0.1	0.1
	0	0	0	0	0	0	0	0	0	0.1	0.1	0.1
	0.1	0.1	0.1	0	0	0	0	0	0	0	0	0
	0.1	0.1	0.1	0	0	0	0	0	0	0	0	0
	0	0	0	0.1	0.1	0.1	0	0	0	0	0	0
	0.1	0.1	0.1	0	0	0	0	0	0	0	0	0
	0.1	0.1	0.1	0	0	0	0	0	0	0.1	0.1	0.1
	0.1	0.1	0.1	0	0	0	0	0	0	0	0	0
	0	0	0	0	0	0	0	0	0	0.1	0.1	0.1
	0.1	0.1	0.1	0	0	0	0.1	0.1	0.1	0	0	0
	0.1	0.1	0.1	0	0	0	0	0	0	0.1	0.1	0.1
	0	0	0	0	0	0	0	0	0	0.1	0.1	0.1
	0	0	0	0	0	0	0	0	0	0.1	0.1	0.1
	0	0	0	0	0	0	0	0	0	0.1	0.1	0.1
	0	0	0	0	0	0	0	0	0	0.1	0.1	0.1
	0.1	0.1	0.1	0	0	0	0	0	0	0.1	0.1	0.1
	0.1	0.1	0.1	0	0	0	0	0	0	0.1	0.1	0.1
	0	0	0	0	0	0	0.1	0.1	0.1	0.1	0.1	0.1
	0.1	0.1	0.1	0	0	0	0	0	0	0	0	0
	0.1	0.1	0.1	0	0	0	0	0	0	0	0	0
	0	0	0	0	0	0	0	0	0	0	0	0
	0.1	0.1	0.1	0	0	0	0	0	0	0.1	0.1	0.1
	0.1	0.1	0.1	0	0	0	0	0	0	0.1	0.1	0.1
	0	0	0	0	0	0	0	0	0	0	0	0
	0	0	0	0	0	0	0	0	0	0.1	0.1	0.1
	0	0	0	0	0	0	0	0	0	0.1	0.1	0.1
	0.1	0.1	0.1	0	0	0	0	0	0	0	0	0
	0	0	0	0	0	0	0	0	0	0	0	0
	0.1	0.1	0.1	0	0	0	0	0	0	0.1	0.1	0.1
	0	0	0	0	0	0	0	0	0	0	0	0
	0.1	0.1	0.1	0	0	0	0	0	0	0	0	0
	0	0	0	0	0	0	0	0	0	0.1	0.1	0.1
	0	0	0	0	0	0	0	0	0	0	0	0
	0.1	0.1	0.1	0	0	0	0	0	0	0.1	0.1	0.1
	0	0	0	0	0	0	0	0	0	0	0	0
	0	0	0	0	0	0	0	0	0	0.1	0.1	0.1
	0	0	0	0	0	0	0	0	0	0.1	0.1	0.1
	0	0	0	0	0	0	0	0	0	0.1	0.1	0.1
	0.1	0.1	0.1	0	0	0	0.1	0.1	0.1	0.1	0.1	0.1
	0.1	0.1	0.1	0	0	0	0	0	0	0	0	0
	0	0	0	0	0	0	0	0	0	0.1	0.1	0.1
	0	0	0	0	0	0	0	0	0	0.1	0.1	0.1
	0	0	0	0	0	0	0	0	0	0.1	0.1	0.1
	0.1	0.1	0.1	0	0	0	0	0	0	0.1	0.1	0.1
	0.1	0.1	0.1	0	0	0	0.1	0.1	0.1	0	0	0
	0.1	0.1	0.1	0	0	0	0.1	0.1	0.1	0.1	0.1	0.1
	0	0	0	0	0	0	0	0	0	0	0	0
	0	0	0	0	0	0	0	0	0	0.1	0.1	0.1
	0.1	0.1	0.1	0	0	0	0	0	0	0	0	0
	0.1	0.1	0.1	0	0	0	0	0	0	0.1	0.1	0.1
	0	0	0	0.1	0.1	0.1	0	0	0	0.1	0.1	0.1
	0.1	0.1	0.1	0	0	0	0	0	0	0.1	0.1	0.1
	0.1	0.1	0.1	0	0	0	0	0	0	0	0	0
	0	0	0	0.1	0.1	0.1	0	0	0	0.1	0.1	0.1
	0	0	0	0	0	0	0	0	0	0	0	0
	0	0	0	0	0	0	0	0	0	0.1	0.1	0.1
	0	0	0	0	0	0	0	0	0	0	0	0
	0.1	0.1	0.1	0	0	0	0	0	0	0	0	0
	0	0	0	0	0	0	0	0	0	0.1	0.1	0.1
	0.1	0.1	0.1	0	0	0	0	0	0	0.1	0.1	0.1
	0	0	0	0	0	0	0	0	0	0.1	0.1	0.1
	0	0	0	0	0	0	0	0	0	0.1	0.1	0.1
	0	0	0	0	0	0	0	0	0	0	0	0
	0.1	0.1	0.1	0	0	0	0	0	0	0	0	0
	0	0	0	0	0	0	0	0	0	0.1	0.1	0.1
	0.1	0.1	0.1	0	0	0	0	0	0	0.1	0.1	0.1
	0	0	0	0	0	0	0	0	0	0	0	0
	0	0	0	0	0	0	0	0	0	0.1	0.1	0.1
	0.1	0.1	0.1	0	0	0	0	0	0	0.1	0.1	0.1
	0.1	0.1	0.1	0	0	0	0	0	0	0.1	0.1	0.1
	0	0	0	0	0	0	0	0	0	0	0	0
	0.1	0.1	0.1	0	0	0	0	0	0	0.1	0.1	0.1
	0	0	0	0	0	0	0	0	0	0	0	0
	0	0	0	0	0	0	0	0	0	0	0	0
	0.1	0.1	0.1	0	0	0	0	0	0	0.1	0.1	0.1
	0	0	0	0	0	0	0	0	0	0	0	0
	0.1	0.1	0.1	0	0	0	0	0	0	0.1	0.1	0.1
	0	0	0	0	0	0	0	0	0	0.1	0.1	0.1
	0.1	0.1	0.1	0	0	0	0	0	0	0.1	0.1	0.1
	0.1	0.1	0.1	0	0	0	0	0	0	0.1	0.1	0.1
	0.1	0.1	0.1	0	0	0	0	0	0	0	0	0
	0.1	0.1	0.1	0	0	0	0.1	0.1	0.1	0.1	0.1	0.1
	0.1	0.1	0.1	0	0	0	0	0	0	0	0	0
	0	0	0	0	0	0	0	0	0	0.1	0.1	0.1
	0.1	0.1	0.1	0	0	0	0	0	0	0	0	0
	0.1	0.1	0.1	0	0	0	0	0	0	0	0	0
	0.1	0.1	0.1	0	0	0	0	0	0	0	0	0
	0.1	0.1	0.1	0	0	0	0	0	0	0.1	0.1	0.1
	0	0	0	0	0	0	0	0	0	0	0	0
	0.1	0.1	0.1	0	0	0	0	0	0	0	0	0
	0	0	0	0	0	0	0	0	0	0.1	0.1	0.1
	0.1	0.1	0.1	0	0	0	0	0	0	0.1	0.1	0.1
	0	0	0	0	0	0	0	0	0	0.1	0.1	0.1
	0	0	0	0	0	0	0	0	0	0	0	0
	0	0	0	0	0	0	0	0	0	0	0	0
	0.1	0.1	0.1	0	0	0	0	0	0	0	0	0
	0.1	0.1	0.1	0	0	0	0	0	0	0.1	0.1	0.1
	0	0	0	0	0	0	0	0	0	0.1	0.1	0.1
	0	0	0	0	0	0	0	0	0	0	0	0
	0	0	0	0	0	0	0	0	0	0.1	0.1	0.1
	0.1	0.1	0.1	0	0	0	0.1	0.1	0.1	0.1	0.1	0.1
	0.1	0.1	0.1	0	0	0	0	0	0	0.1	0.1	0.1
	0.1	0.1	0.1	0	0	0	0	0	0	0	0	0
	0	0	0	0	0	0	0	0	0	0.1	0.1	0.1
	0.1	0.1	0.1	0	0	0	0	0	0	0.1	0.1	0.1
	0.1	0.1	0.1	0	0	0	0.1	0.1	0.1	0.1	0.1	0.1
	0.1	0.1	0.1	0	0	0	0	0	0	0	0	0
	0.1	0.1	0.1	0	0	0	0	0	0	0.1	0.1	0.1
	0	0	0	0	0	0	0	0	0	0.1	0.1	0.1
	0	0	0	0	0	0	0	0	0	0	0	0
	0	0	0	0	0	0	0	0	0	0	0	0
	0	0	0	0	0	0	0	0	0	0	0	0
	0	0	0	0	0	0	0	0	0	0.1	0.1	0.1
	0.1	0.1	0.1	0	0	0	0	0	0	0.1	0.1	0.1
	0	0	0	0	0	0	0	0	0	0.1	0.1	0.1
	0	0	0	0	0	0	0.1	0.1	0.1	0.1	0.1	0.1
	0.1	0.1	0.1	0	0	0	0	0	0	0.1	0.1	0.1
	0	0	0	0	0	0	0	0	0	0.1	0.1	0.1
	0	0	0	0	0	0	0	0	0	0	0	0
	0	0	0	0	0	0	0	0	0	0	0	0
	0	0	0	0	0	0	0.1	0.1	0.1	0	0	0
	0.1	0.1	0.1	0	0	0	0	0	0	0.1	0.1	0.1
	0	0	0	0	0	0	0.1	0.1	0.1	0	0	0
	0	0	0	0	0	0	0	0	0	0.1	0.1	0.1
	0.1	0.1	0.1	0	0	0	0	0	0	0	0	0
	0.1	0.1	0.1	0	0	0	0	0	0	0.1	0.1	0.1
	0	0	0	0	0	0	0	0	0	0	0	0
	0.1	0.1	0.1	0	0	0	0	0	0	0.1	0.1	0.1
	0	0	0	0	0	0	0	0	0	0	0	0
	0	0	0	0.1	0.1	0.1	0	0	0	0.1	0.1	0.1
	0.1	0.1	0.1	0	0	0	0	0	0	0.1	0.1	0.1
	0.1	0.1	0.1	0	0	0	0	0	0	0.1	0.1	0.1
	0	0	0	0	0	0	0	0	0	0.1	0.1	0.1
	0	0	0	0	0	0	0	0	0	0.1	0.1	0.1
	0	0	0	0	0	0	0	0	0	0.1	0.1	0.1
	0	0	0	0	0	0	0	0	0	0.1	0.1	0.1
	0.1	0.1	0.1	0	0	0	0	0	0	0.1	0.1	0.1
	0.1	0.1	0.1	0	0	0	0	0	0	0	0	0
	0	0	0	0	0	0	0.1	0.1	0.1	0.1	0.1	0.1
	0	0	0	0	0	0	0	0	0	0.1	0.1	0.1
	0	0	0	0	0	0	0	0	0	0.1	0.1	0.1
	0	0	0	0	0	0	0	0	0	0.1	0.1	0.1
	0	0	0	0	0	0	0	0	0	0.1	0.1	0.1
	0.1	0.1	0.1	0	0	0	0	0	0	0.1	0.1	0.1
	0.1	0.1	0.1	0	0	0	0	0	0	0.1	0.1	0.1
	0.1	0.1	0.1	0	0	0	0	0	0	0.1	0.1	0.1
	0	0	0	0	0	0	0	0	0	0	0	0
	0.1	0.1	0.1	0	0	0	0	0	0	0.1	0.1	0.1
	0.1	0.1	0.1	0	0	0	0	0	0	0	0	0
	0.1	0.1	0.1	0.1	0.1	0.1	0	0	0	0.1	0.1	0.1
	0.1	0.1	0.1	0.1	0.1	0.1	0	0	0	0.1	0.1	0.1
	0.1	0.1	0.1	0	0	0	0	0	0	0.1	0.1	0.1
	0	0	0	0	0	0	0	0	0	0.1	0.1	0.1
	0	0	0	0	0	0	0	0	0	0.1	0.1	0.1
	0.1	0.1	0.1	0	0	0	0	0	0	0	0	0
	0	0	0	0	0	0	0.1	0.1	0.1	0	0	0
	0	0	0	0	0	0	0	0	0	0	0	0
	0	0	0	0.1	0.1	0.1	0	0	0	0	0	0
	0.1	0.1	0.1	0	0	0	0	0	0	0.1	0.1	0.1
	0	0	0	0	0	0	0	0	0	0.1	0.1	0.1
	0.1	0.1	0.1	0	0	0	0	0	0	0.1	0.1	0.1
	0.1	0.1	0.1	0	0	0	0	0	0	0	0	0
	0	0	0	0	0	0	0.1	0.1	0.1	0.1	0.1	0.1
	0	0	0	0	0	0	0	0	0	0.1	0.1	0.1
	0	0	0	0	0	0	0	0	0	0	0	0
	0	0	0	0	0	0	0	0	0	0.1	0.1	0.1
	0.1	0.1	0.1	0	0	0	0	0	0	0.1	0.1	0.1
	0	0	0	0	0	0	0	0	0	0.1	0.1	0.1
	0	0	0	0	0	0	0.1	0.1	0.1	0.1	0.1	0.1
	0	0	0	0	0	0	0	0	0	0	0	0
	0	0	0	0	0	0	0	0	0	0	0	0
	0	0	0	0	0	0	0	0	0	0	0	0
	0.1	0.1	0.1	0	0	0	0	0	0	0.1	0.1	0.1
	0	0	0	0	0	0	0	0	0	0.1	0.1	0.1
	0.1	0.1	0.1	0	0	0	0	0	0	0.1	0.1	0.1
	0.1	0.1	0.1	0	0	0	0	0	0	0.1	0.1	0.1
	0	0	0	0	0	0	0	0	0	0.1	0.1	0.1
	0.1	0.1	0.1	0	0	0	0	0	0	0	0	0
	0.1	0.1	0.1	0	0	0	0	0	0	0	0	0
	0	0	0	0	0	0	0	0	0	0	0	0
	0	0	0	0	0	0	0	0	0	0.1	0.1	0.1
	0.1	0.1	0.1	0	0	0	0	0	0	0	0	0
	0.1	0.1	0.1	0	0	0	0	0	0	0.1	0.1	0.1
	0.1	0.1	0.1	0	0	0	0	0	0	0.1	0.1	0.1
	0.1	0.1	0.1	0	0	0	0	0	0	0.1	0.1	0.1
	0.1	0.1	0.1	0	0	0	0	0	0	0.1	0.1	0.1
	0.1	0.1	0.1	0	0	0	0.1	0.1	0.1	0.1	0.1	0.1
	0	0	0	0	0	0	0	0	0	0	0	0
	0.1	0.1	0.1	0	0	0	0	0	0	0.1	0.1	0.1
	0	0	0	0	0	0	0	0	0	0.1	0.1	0.1
	0.1	0.1	0.1	0	0	0	0	0	0	0.1	0.1	0.1
	0	0	0	0	0	0	0	0	0	0.1	0.1	0.1
	0	0	0	0	0	0	0	0	0	0	0	0
	0.1	0.1	0.1	0	0	0	0.1	0.1	0.1	0	0	0
	0	0	0	0.1	0.1	0	0	0	0	0.1	0.1	0.1
	0.1	0.1	0.1	0	0	0	0	0	0	0	0	0
	0	0	0	0	0	0	0	0	0	0	0	0
	0.1	0.1	0.1	0	0	0	0	0	0	0.1	0.1	0.1
	0	0	0	0	0	0	0	0	0	0.1	0.1	0.1
	0	0	0	0	0	0	0	0	0	0	0	0
	0.1	0.1	0.1	0	0	0	0	0	0	0.1	0.1	0.1
	0.1	0.1	0.1	0	0	0	0	0	0	0	0	0
	0.1	0.1	0.1	0	0	0	0	0	0	0.1	0.1	0.1
	0.1	0.1	0.1	0	0	0	0	0	0	0.1	0.1	0.1
	0	0	0	0	0	0	0	0	0	0	0	0
	0	0	0	0	0	0	0	0	0	0.1	0.1	0.1
	0	0	0	0	0	0	0	0	0	0.1	0.1	0.1
	0	0	0	0	0	0	0	0	0	0.1	0.1	0.1
	0	0	0	0.1	0.1	0.1	0	0	0	0.1	0.1	0.1
	0	0	0	0	0	0	0	0	0	0.1	0.1	0.1
	0	0	0	0	0	0	0	0	0	0	0	0
	0	0	0	0	0	0	0	0	0	0.1	0.1	0.1
	0.1	0.1	0.1	0	0	0	0	0	0	0.1	0.1	0.1
	0.1	0.1	0.1	0	0	0	0	0	0	0.1	0.1	0.1
	0	0	0	0	0	0	0	0	0	0.1	0.1	0.1
	0.1	0.1	0.1	0	0	0	0	0	0	0.1	0.1	0.1
	0.1	0.1	0.1	0	0	0	0	0	0	0.1	0.1	0.1
	0	0	0	0	0	0	0	0	0	0.1	0.1	0.1
	0.1	0.1	0.1	0	0	0	0	0	0	0.1	0.1	0.1
	0	0	0	0	0	0	0.1	0.1	0.1	0.1	0.1	0.1
	0	0	0	0	0	0	0	0	0	0.1	0.1	0.1
	0.1	0.1	0.1	0	0	0	0	0	0	0.1	0.1	0.1
	0.1	0.1	0.1	0	0	0	0	0	0	0.1	0.1	0.1
	0.1	0.1	0.1	0	0	0	0	0	0	0.1	0.1	0.1
	0.1	0.1	0.1	0.1	0.1	0.1	0	0	0	0	0	0
	0	0	0	0	0	0	0	0	0	0.1	0.1	0.1
	0.1	0.1	0.1	0	0	0	0	0	0	0	0	0
	0	0	0	0.2	0.2	0	0	0	0	0	0	0
	0	0	0	0	0	0	0	0	0	0	0	0
	0	0	0	0	0	0	0	0	0	0	0	0
	0.1	0.1	0.1	0	0	0	0	0	0	0.1	0.1	0.1
	0.1	0.1	0.1	0	0	0	0	0	0	0.1	0.1	0.1
	0	0	0	0	0	0	0	0	0	0.1	0.1	0.1
	0	0	0	0	0	0	0	0	0	0.1	0.1	0.1
	0	0	0	0	0	0	0	0	0	0.1	0.1	0.1
	0	0	0	0	0	0	0	0	0	0.1	0.1	0.1
	0.1	0.1	0.1	0	0	0	0	0	0	0.1	0.1	0.1
	0	0	0	0	0	0	0	0	0	0.1	0.1	0.1
	0.1	0.1	0.1	0	0	0	0	0	0	0.1	0.1	0.1
	0.1	0.1	0.1	0	0	0	0	0	0	0	0	0
	0	0	0	0	0	0	0	0	0	0	0	0
	0.1	0.1	0.1	0	0	0	0	0	0	0	0	0
	0.1	0.1	0.1	0	0	0	0	0	0	0.1	0.1	0.1
	0.1	0.1	0.1	0	0	0	0	0	0	0.1	0.1	0.1
	0.1	0.1	0.1	0	0	0	0	0	0	0.1	0.1	0.1
	0.1	0.1	0.1	0	0	0	0	0	0	0	0	0
	0	0	0	0	0	0	0	0	0	0.1	0.1	0.1
	0	0	0	0	0	0	0	0	0	0	0	0
	0	0	0	0	0	0	0	0	0	0.1	0.1	0.1
	0	0	0	0	0	0	0	0	0	0	0	0
	0	0	0	0	0	0	0	0	0	0.1	0.1	0.1
	0.1	0.1	0.1	0	0	0	0	0	0	0.1	0.1	0.1
	0	0	0	0	0	0	0	0	0	0.1	0.1	0.1
	0.1	0.1	0.1	0	0	0	0	0	0	0	0	0
	0	0	0	0	0	0	0	0	0	0.1	0.1	0.1
	0.1	0.1	0.1	0	0	0	0	0	0	0.1	0.1	0.1
	0.1	0.1	0.1	0.1	0.1	0.1	0	0	0	0.1	0.1	0.1
	0	0	0	0.1	0.1	0.1	0	0	0	0.1	0.1	0.1
	0	0	0	0	0	0	0	0	0	0.1	0.1	0.1
	0	0	0	0	0	0	0	0	0	0	0	0
	0.1	0.1	0.1	0	0	0	0	0	0	0	0	0
	0	0	0	0	0	0	0	0	0	0.1	0.1	0.1
	0.1	0.1	0.1	0	0	0	0	0	0	0.1	0.1	0.1
	0	0	0	0	0	0	0	0	0	0	0	0
	0.1	0.1	0.1	0.1	0.1	0.1	0	0	0	0.1	0.1	0.1
	0	0	0	0	0	0	0	0	0	0.1	0.1	0.1
	0	0	0	0	0	0	0	0	0	0.1	0.1	0.1
				0	0	0	0	0	0	0	0	0
				0.1	0.1	0.1	0	0	0	0.1	0.1	0.1
				0	0	0	0	0	0	0.1	0.1	0.1
				0	0	0	0	0	0	0.1	0.1	0.1
				0	0	0	0	0	0	0	0	0
				0	0	0	0	0	0	0.1	0.1	0.1
				0	0	0	0	0	0	0.1	0.1	0.1
				0	0	0	0	0	0	0	0	0
				0	0	0	0	0	0	0.1	0.1	0.1
				0	0	0	0	0	0	0.1	0.1	0.1
				0	0	0	0	0	0	0.1	0.1	0.1
				0	0	0	0	0	0	0	0	0
				0	0	0	0	0	0	0.1	0.1	0.1
				0	0	0	0	0	0	0	0	0
				0	0	0	0	0	0	0.1	0.1	0.1
				0	0	0	0	0	0	0	0	0
				0	0	0	0	0	0	0	0	0
				0	0	0	0	0	0	0	0	0
				0	0	0	0.1	0.1	0.1	0.1	0.1	0.1
				0	0	0	0	0	0	0.1	0.1	0.1
				0	0	0	0	0	0	0.1	0.1	0.1
				0	0	0	0	0	0	0	0	0
				0	0	0	0	0	0	0.1	0.1	0.1
				0	0	0	0	0	0	0	0	0
				0	0	0	0.1	0.1	0.1	0.1	0.1	0.1
				0	0	0	0	0	0	0.1	0.1	0.1
				0	0	0	0	0	0	0.1	0.1	0.1
				0	0	0	0	0	0	0.1	0.1	0.1
				0.1	0.1	0.1	0.1	0.1	0.1	0	0	0
				0	0	0	0	0	0	0.1	0.1	0.1
				0	0	0	0	0	0	0.1	0.1	0.1
				0	0	0	0	0	0	0.1	0.1	0.1
							0	0	0	0.1	0.1	0.1
							0	0	0	0.1	0.1	0.1
							0	0	0	0.1	0.1	0.1
							0	0	0	0.1	0.1	0.1
							0	0	0	0.1	0.1	0.1
							0	0	0	0	0	0
							0	0	0	0.1	0.1	0.1
							0	0	0	0.1	0.1	0.1
							0	0	0	0.1	0.1	0.1
							0	0	0	0	0	0
							0	0	0	0.1	0.1	0.1
							0	0	0	0.1	0.1	0.1
							0	0	0	0.1	0.1	0.1
							0	0	0	0.1	0.1	0.1
							0	0	0	0.1	0.1	0.1
							0	0	0	0.1	0.1	0.1
							0	0	0	0.1	0.1	0.1
							0	0	0	0	0	0
							0	0	0	0	0	0
							0	0	0	0.1	0.1	0.1
							0	0	0	0.1	0.1	0.1
							0	0	0	0	0	0
							0	0	0	0	0	0
							0	0	0	0	0	0
							0	0	0	0.1	0.1	0.1
							0	0	0	0.1	0.1	0.1
							0	0	0	0.1	0.1	0.1
							0	0	0	0.1	0.1	0.1
							0	0	0	0	0	0
							0	0	0	0.2	0.2	0.1
							0	0	0	0.1	0.1	0.1
							0	0	0	0	0	0
							0	0	0	0	0	0
							0	0	0	0.1	0.1	0.1
							0	0	0	0	0	0
							0.1	0.1	0.1	0.1	0.1	0.1
							0	0	0	0.1	0.1	0.1
							0	0	0	0.1	0.1	0.1
							0.1	0.1	0.1	0.1	0.1	0.1
							0	0	0	0.1	0.1	0.1
							0	0	0	0.1	0.1	0.1
							0	0	0	0	0	0
							0	0	0	0	0	0
							0	0	0	0.1	0.1	0.1
							0	0	0	0.1	0.1	0.1
							0	0	0	0	0	0
							0	0	0	0.1	0.1	0.1
							0	0	0	0	0	0
							0	0	0	0.1	0.1	0.1
							0.4	0.3	0	0.1	0.1	0.1
							0	0	0	0.1	0.1	0.1
							0	0	0	0.1	0.1	0.1
							0	0	0	0.1	0.1	0.1
							0	0	0	0.1	0.1	0.1
							0	0	0	0	0	0
							0	0	0	0.1	0.1	0.1
							0.1	0.1	0.1	0.1	0.1	0.1
							0	0	0	0.1	0.1	0.1
							0	0	0	0.1	0.1	0.1
							0	0	0	0.1	0.1	0.1
							0	0	0	0.1	0.1	0.1
							0	0	0	0.1	0.1	0.1
							0	0	0	0.1	0.1	0.1
							0.1	0.1	0.1	0	0	0
							0	0	0	0	0	0
							0	0	0	0	0	0
							0	0	0	0	0	0
							0	0	0	0.1	0.1	0.1
							0	0	0	0.1	0.1	0.1
							0	0	0	0	0	0
							0	0	0	0	0	0
							0	0	0	0.1	0.1	0.1
							0	0	0	0	0	0
							0	0	0	0.1	0.1	0.1
							0	0	0	0	0	0
							0	0	0	0.1	0.1	0.1
							0	0	0	0	0	0
							0	0	0	0.1	0.1	0.1
							0	0	0	0.1	0.1	0.1
							0	0	0	0.1	0.1	0.1
							0	0	0	0.1	0.1	0.1
							0	0	0	0.1	0.1	0.1
							0	0	0	0.1	0.1	0.1
							0	0	0	0.1	0.1	0.1
							0	0	0	0.1	0.1	0.1
							0	0	0	0.1	0.1	0.1
							0	0	0	0.1	0.1	0.1
							0	0	0	0.1	0.1	0.1
							0	0	0	0.1	0.1	0.1
							0	0	0	0	0	0
							0.1	0.1	0	0.1	0.1	0.1
							0	0	0	0.1	0.1	0.1
							0	0	0	0.1	0.1	0.1
							0	0	0	0.1	0.1	0.1
							0	0	0	0.1	0.1	0.1
							0	0	0	0	0	0
							0.1	0.1	0.1	0	0	0
							0	0	0	0	0	0
							0	0	0	0.1	0.1	0.1
							0	0	0	0	0	0
							0	0	0	0.1	0.1	0.1
							0	0	0	0.1	0.1	0.1
							0	0	0	0.1	0.1	0.1
							0	0	0	0.1	0.1	0.1
							0	0	0	0.1	0.1	0.1
							0	0	0	0.1	0.1	0.1
							0	0	0	0.1	0.1	0.1
							0	0	0	0.1	0.1	0.1
							0	0	0	0	0	0
							0.1	0.1	0.1	0.1	0.1	0.1
							0	0	0	0.1	0.1	0.1
							0	0	0	0.1	0.1	0.1
							0	0	0	0.1	0.1	0.1
							0	0	0	0.1	0.1	0.1
							0	0	0	0.1	0.1	0.1
							0	0	0	0.1	0.1	0.1
							0	0	0	0.1	0.1	0.1
							0	0	0	0.1	0.1	0.1
							0	0	0	0.1	0.1	0.1
							0	0	0	0.1	0.1	0.1
							0	0	0	0.1	0.1	0.1
							0.1	0.1	0.1	0.1	0.1	0.1
							0.1	0.1	0.1	0.1	0.1	0.1
							0	0	0	0.1	0.1	0.1
							0	0	0	0.1	0.1	0.1
							0	0	0	0.1	0.1	0.1
							0	0	0	0.1	0.1	0.1
							0	0	0	0.1	0.1	0.1
							0.1	0.1	0.1	0	0	0
							0.1	0.1	0.1	0	0	0
							0	0	0	0.1	0.1	0.1
							0	0	0	0.1	0.1	0.1
							0	0	0	0	0	0
							0	0	0	0.1	0.1	0.1
							0	0	0	0.1	0.1	0.1
							0	0	0	0.1	0.1	0.1
							0	0	0	0.1	0.1	0.1
							0	0	0	0.1	0.1	0.1
							0	0	0	0.1	0.1	0.1
							0	0	0	0.1	0.1	0.1
							0	0	0	0.1	0.1	0.1
							0	0	0	0	0	0
							0	0	0	0.1	0.1	0.1
							0	0	0	0	0	0
							0	0	0	0.1	0.1	0.1
							0	0	0	0	0	0
							0	0	0	0.1	0.1	0.1
							0	0	0	0.1	0.1	0.1
							0	0	0	0.1	0.1	0.1
							0	0	0	0.1	0.1	0.1
							0	0	0	0.1	0.1	0.1
							0	0	0	0.1	0.1	0.1
							0	0	0	0.1	0.1	0.1
							0	0	0	0.1	0.1	0.1
							0	0	0	0.1	0.1	0.1
							0	0	0	0.1	0.1	0.1
							0	0	0	0	0	0
							0	0	0	0.1	0.1	0.1
							0	0	0	0.1	0.1	0.1
							0	0	0	0.1	0.1	0.1
							0	0	0	0.1	0.1	0.1
							0	0	0	0.1	0.1	0.1
							0	0	0	0.1	0.1	0.1
							0	0	0	0	0	0
							0	0	0	0.1	0.1	0.1
							0	0	0	0.1	0.1	0.1
							0	0	0	0.1	0.1	0.1
							0	0	0	0	0	0
							0	0	0	0.1	0.1	0.1
							0	0	0	0.1	0.1	0.1
							0	0	0	0.1	0.1	0.1
							0	0	0	0.1	0.1	0.1
							0	0	0	0.1	0.1	0.1
							0	0	0	0.1	0.1	0.1
							0.1	0.1	0.1	0	0	0
							0.1	0.1	0.1	0.1	0.1	0.1
							0	0	0	0.1	0.1	0.1
							0.1	0.1	0.1	0.1	0.1	0.1
							0	0	0	0	0	0
							0	0	0	0.1	0.1	0.1
							0	0	0	0.1	0.1	0.1
							0	0	0	0.1	0.1	0.1
							0	0	0	0.1	0.1	0.1
							0	0	0	0.1	0.1	0.1
							0	0	0	0	0	0
							0	0	0	0.1	0.1	0.1
							0	0	0	0.1	0.1	0.1
							0	0	0	0	0	0
							0	0	0	0.1	0.1	0.1
							0	0	0	0	0	0
							0	0	0	0.1	0.1	0.1
							0	0	0	0.1	0.1	0.1
							0	0	0	0.1	0.1	0.1
							0	0	0	0.1	0.1	0.1
							0	0	0	0.1	0.1	0.1
							0	0	0	0.1	0.1	0.1
							0	0	0	0	0	0
							0	0	0	0.1	0.1	0.1
							0	0	0	0.1	0.1	0.1
							0	0	0	0.1	0.1	0.1
							0	0	0	0	0	0
							0	0	0	0	0	0
							0	0	0	0.1	0.1	0.1
							0	0	0	0.1	0.1	0.1
							0	0	0	0.1	0.1	0.1
							0	0	0	0	0	0
							0	0	0	0	0	0
							0	0	0	0.1	0.1	0.1
							0.1	0.1	0.1	0	0	0
							0.1	0.1	0.1	0.1	0.1	0.1
							0	0	0	0.1	0.1	0.1
							0	0	0	0.1	0.1	0.1
							0	0	0	0.1	0.1	0.1
							0	0	0	0	0	0
							0	0	0	0.1	0.1	0.1
							0	0	0	0.1	0.1	0.1
							0	0	0	0.1	0.1	0.1
							0	0	0	0.1	0.1	0.1
							0	0	0	0.1	0.1	0.1
							0	0	0	0	0	0
							0	0	0	0.1	0.1	0.1
							0	0	0	0.1	0.1	0.1
							0	0	0	0.1	0.1	0.1
							0	0	0	0.1	0.1	0.1
							0	0	0	0.1	0.1	0.1
							0	0	0	0.1	0.1	0.1
							0	0	0	0.1	0.1	0.1
							0	0	0	0.1	0.1	0.1
							0	0	0	0	0	0
							0	0	0	0.1	0.1	0.1
							0	0	0	0.1	0.1	0.1
							0	0	0	0	0	0
							0	0	0	0	0	0
							0	0	0	0.1	0.1	0.1
							0	0	0	0	0	0
							0	0	0	0	0	0
							0	0	0	0	0	0
							0	0	0	0.1	0.1	0.1
							0	0	0	0.1	0.1	0.1
							0	0	0	0.1	0.1	0.1
							0	0	0	0.1	0.1	0.1
							0	0	0	0.1	0.1	0.1
							0	0	0	0.1	0.1	0.1
							0	0	0	0.1	0.1	0.1
							0	0	0	0.1	0.1	0.1
							0	0	0	0	0	0
							0	0	0	0.1	0.1	0.1
							0	0	0	0.1	0.1	0.1
							0	0	0	0.1	0.1	0.1
							0	0	0	0.1	0.1	0.1
							0	0	0	0.1	0.1	0.1
							0	0	0	0.1	0.1	0.1
							0	0	0	0.1	0.1	0.1
							0.1	0.1	0.1	0.1	0.1	0.1
							0	0	0	0.1	0.1	0.1
							0	0	0	0.1	0.1	0.1
							0	0	0	0.1	0.1	0.1
							0	0	0	0.1	0.1	0.1
							0	0	0	0	0	0
							0	0	0	0.1	0.1	0.1
							0	0	0	0	0	0
							0	0	0	0	0	0
							0	0	0	0.1	0.1	0.1
							0.1	0.1	0.1	0.1	0.1	0.1
							0	0	0	0.1	0.1	0.1
							0	0	0	0.1	0.1	0.1
							0	0	0	0.1	0.1	0.1
							0	0	0	0.1	0.1	0.1
							0	0	0	0.1	0.1	0.1
							0	0	0	0.1	0.1	0.1
							0	0	0	0.1	0.1	0.1
							0	0	0	0.1	0.1	0.1
							0	0	0	0.1	0.1	0.1
							0	0	0	0.1	0.1	0.1
							0	0	0	0	0	0
							0.1	0.1	0.1	0	0	0
							0	0	0	0.1	0.1	0.1
							0	0	0	0.1	0.1	0.1
							0	0	0	0.1	0.1	0.1
							0	0	0	0.1	0.1	0.1
							0	0	0	0.1	0.1	0.1
							0	0	0	0.1	0.1	0.1
							0	0	0	0.1	0.1	0.1
							0	0	0	0.1	0.1	0.1
							0	0	0	0	0	0
							0	0	0	0.1	0.1	0.1
							0	0	0	0	0	0
							0	0	0	0	0	0
							0	0	0	0	0	0
							0	0	0	0.1	0.1	0.1
							0	0	0	0.1	0.1	0.1
							0	0	0	0.1	0.1	0.1
							0	0	0	0.1	0.1	0.1
							0	0	0	0.1	0.1	0.1
							0	0	0	0.1	0.1	0.1
							0	0	0	0.1	0.1	0.1
							0	0	0	0.1	0.1	0.1
							0	0	0	0	0	0
							0	0	0	0.1	0.1	0.1
							0	0	0	0.1	0.1	0.1
							0	0	0	0	0	0
							0	0	0	0.1	0.1	0.1
							0	0	0	0.1	0.1	0.1
							0.1	0.1	0.1	0.1	0.1	0.1
							0	0	0	0.1	0.1	0.1
							0	0	0	0.1	0.1	0.1
							0	0	0	0	0	0
							0	0	0	0.1	0.1	0.1
							0	0	0	0.1	0.1	0.1
							0	0	0	0	0	0
							0.1	0.1	0.1	0	0	0
							0	0	0	0.2	0.2	0.1
							0	0	0	0.1	0.1	0.1
							0	0	0	0.1	0.1	0.1
							0	0	0	0.1	0.1	0.1
							0	0	0	0.1	0.1	0.1
							0	0	0	0.1	0.1	0.1
							0	0	0	0.1	0.1	0.1
							0	0	0	0.1	0.1	0.1
							0	0	0	0.1	0.1	0.1
							0	0	0	0	0	0
							0	0	0	0.1	0.1	0.1
							0	0	0	0.1	0.1	0.1
							0	0	0	0	0	0
							0	0	0	0.1	0.1	0.1
							0	0	0	0.1	0.1	0.1
							0	0	0	0.1	0.1	0.1
							0	0	0	0.1	0.1	0.1
							0	0	0	0.1	0.1	0.1
							0	0	0	0	0	0
							0	0	0	0.1	0.1	0.1
							0	0	0	0	0	0
							0	0	0	0	0	0
							0	0	0	0.1	0.1	0.1
							0	0	0	0.1	0.1	0.1
							0	0	0	0.1	0.1	0.1
							0	0	0	0.1	0.1	0.1
							0	0	0	0	0	0
							0	0	0	0.1	0.1	0.1
							0	0	0	0.1	0.1	0.1
							0	0	0	0.1	0.1	0.1
							0	0	0	0.1	0.1	0.1
							0	0	0	0.1	0.1	0.1
							0	0	0	0.1	0.1	0.1
							0	0	0	0.1	0.1	0.1
							0	0	0	0.1	0.1	0.1
							0	0	0	0.1	0.1	0.1
							0	0	0	0.1	0.1	0.1
							0	0	0	0	0	0
							0	0	0
							0	0	0
							0	0	0
							0	0	0
							0	0	0
							0	0	0
							0	0	0
							0	0	0
							0	0	0
							0	0	0
							0	0	0
							0	0	0
							0	0	0
							0	0	0
							0	0	0
							0	0	0
							0	0	0
							0	0	0
							0	0	0
							0	0	0
							0	0	0
							0.1	0.1	0.1
							0	0	0
							0	0	0
							0	0	0
							0	0	0
							0	0	0
							0	0	0
							0	0	0
							0.1	0.1	0.1
							0	0	0
							0.1	0.1	0.1
							0	0	0
							0.1	0.1	0.1
							0	0	0
							0	0	0
							0	0	0
							0	0	0
							0	0	0
							0	0	0
							0	0	0
							0	0	0
							0	0	0
							0.1	0.1	0.1
							0	0	0
							0	0	0
							0	0	0
							0	0	0
							0	0	0
							0	0	0
							0	0	0
							0	0	0
							0	0	0
							0	0	0
							0	0	0
							0	0	0
							0	0	0
							0	0	0
							0.1	0.1	0.1
							0	0	0
							0	0	0
							0	0	0
							0	0	0
							0.1	0.1	0.1
							0	0	0
							0	0	0
							0	0	0
							0	0	0
							0	0	0
							0	0	0
							0	0	0
							0	0	0
							0.1	0.1	0.1
							0.1	0.1	0.1
							0	0	0
							0	0	0
							0	0	0
							0	0	0
							0	0	0
							0.1	0.1	0.1
							0	0	0
							0.1	0.1	0.1
							0	0	0
							0	0	0
							0	0	0
							0	0	0
							0	0	0
							0	0	0
							0	0	0
							0	0	0
							0	0	0
							0	0	0
							0	0	0
							0	0	0
							0	0	0
	0	0	0	0	0	0	0	0	0	0	0	0
	0	0	0	0	0	0	0	0	0	0	0	0.1
	0	0	0	0	0	0	0	0	0	0	0	0
	0	0	0	0	0	0	0	0	0	0.1	0.3	0
	0	0	0	0	0	0	0	0	0	0	0	0
	0	0	0	0	0	0	0	0	0	0	0	0
	0	0	0	0	0	0	0	0	0	0	0	0.1
	0	0	0	0	0	0	0	0	0	0	0	0
	0	0	0	0	0	0	0	0	0	0	0	0
	0	0	0	0	0	0	0	0	0	0	0	0
	0	0	0	0	0	0	0	0	0	0	0	0
	0.2	0.5	0	0	0	0	0	0	0	0	0	0
	0	0	0	0	0	0	0	0	0	0	0	0
	0	0	0	0	0	0	0	0	0	0	0	0
	0	0	0	0	0	0	0	0	0	0	0	0.1
	0	0	0	0	0	0	0	0	0	0	0	0
	0	0	0	0	0	0	0	0	0	0	0	0
	0	0	0	0	0	0	0	0	0	0	0	0
	0	0	0	0	0	0	0	0	0	0	0	0
	0	0	0	0	0	0	0	0	0	0	0	0
	0	0	0	0	0	0	0	0	0	0	0	0
	0	0	0	0	0	0	0	0	0	0	0	0
	0	0	0	0	0	0	0	0	0	0	0	0
	0	0	0	0	0	0	0	0	0	0	0	0
	0	0	0	0	0	0	0	0	0	0	0	0
	0	0	0	0	0	0	0	0	0	0	0	0
	0	0	0	0	0	0	0	0	0	0	0	0
	0	0.2	0	0	0	0	0	0	0	0	0	0
	0	0	0	0	0	0	0	0	0	0	0	0
	0	0	0	0	0	0	0	0	0	0	0	0
	0	0	0	0	0	0	0	0	0	0	0	0
	0	0	0	0	0	0	0	0	0	0	0	0
	0	0	0	0	0	0	0	0	0.1	0	0	0
	0	0	0	0	0	0	0	0	0	0	0	0
	0	0	0	0	0	0	0	0	0	0	0	0
	0	0	0	0	0	0	0	0	0	0	0	0
	0	0	0	0	0	0.1	0	0	0	0	0	0
	0	0	0.1	0	0	0	0	0	0	0	0	0
	0	0	0	0	0	0	0	0	0	0	0	0
	0	0	0	0	0	0.1	0	0	0	0	0	0
	0	0	0	0	0	0	0	0	0	0	0	0
	0	0	0	0	0	0	0	0	0	0	0	0
	0	0	0.1	0	0	0	0	0	0	0	0	0
	0	0	0	0	0	0	0	0	0	0	0	0
	0	0	0	0	0	0	0	0	0	0	0	0
	0	0	0	0	0	0	0	0	0	0	0	0
	0	0	0	0	0	0	0	0	0	0	0	0
	0	0	0	0	0	0	0	0	0	0	0	0
	0	0	0	0	0	0	0	0	0	0	0	0.1
	0	0	0	0	0	0.1	0	0	0	0	0	0.1
	0	0	0	0	0	0	0	0	0	0	0	0
	0	0	0	0	0	0	0	0	0	0	0.1	0
	0	0	0	0	0	0	0	0	0	0	0	0
	0	0	0	0	0	0	0	0	0.1	0	0	0
	0	0	0	0	0	0	0	0	0	0	0	0
	0	0	0	0	0	0	0	0	0	0	0	0
	0	0	0	0	0	0	0	0	0	0	0	0
	0	0.1	0	0	0	0	0	0	0.1	0	0	0
	0	0	0	0.1	0.5	0.1	0	0	0	0	0	0.1
	0	0	0	0	0	0	0	0	0	0	0	0
	0	0	0	0	0	0	0	0	0	0	0	0
	0	0	0	0	0	0	0	0	0	0	0	0
	0	0	0	0	0	0	0	0	0	0	0	0
	0	0	0	0	0	0	0	0	0	0	0	0
	0	0	0	0	0	0	0	0	0	0	0	0.1
	0	0	0.1	0	0	0	0	0	0	0	0	0
	0	0	0	0	0	0.1	0	0	0	0	0	0
	0	0	0.1	0	0	0	0	0	0	0	0	0
	0	0	0	0	0	0	0	0	0	0	0	0
	0	0	0	0	0	0.1	0	0	0	0	0	0
	0	0	0	0	0	0	0	0	0	0	0	0
	0	0	0	0	0	0.1	0	0	0	0	0	0
	0	0	0	0	0	0	0	0	0	0	0	0
	0	0	0	0	0	0	0	0	0	0	0	0
	0	0	0	0	0	0	0	0	0	0	0	0.1
	0	0	0	0	0	0	0	0	0	0	0	0
	0	0	0	0	0	0	0	0	0	0	0	0
	0	0	0	0	0	0	0	0	0	0	0	0.1
	0	0	0	0	0	0	0	0	0	0	0	0
	0	0	0	0	0	0	0	0	0	0	0	0
	0	0	0	0	0	0	0	0	0	0	0	0
	0	0	0	0	0	0	0	0	0	0	0	0
	0	0	0	0	0	0	0	0	0	0	0	0
	0	0	0	0	0	0	0	0	0	0	0	0
	0	0	0	0	0	0	0	0	0	0	0	0
	0	0	0.1	0	0	0	0	0	0	0	0	0
	0	0	0	0	0	0	0	0	0	0	0	0
	0	0	0	0	0	0	0	0	0	0	0	0
	0	0	0	0	0	0	0	0	0	0	0	0
	0	0	0	0	0	0	0	0	0	0	0	0
	0	0	0	0	0	0	0	0	0	0	0	0
	0	0	0	0	0	0	0	0	0	0	0	0
	0	0	0	0	0	0	0	0	0	0	0	0
	0	0	0	0	0	0	0	0	0	0	0	0
	0	0	0	0	0	0	0	0	0	0	0	0
	0	0	0	0	0	0	0	0	0	0	0	0.1
	0	0	0	0	0	0	0	0	0	0	0	0.1
	0	0	0	0	0	0	0	0	0	0	0	0
	0	0	0	0	0	0	0	0	0	0	0	0
	0	0	0	0	0	0	0	0	0	0	0	0
	0	0	0	0	0	0	0	0	0	0	0	0
	0	0	0	0	0	0	0	0	0	0	0	0
	0	0	0	0	0	0	0	0	0.1	0	0	0
	0	0	0	0	0	0	0	0	0	0	0	0
	0	0	0.1	0	0	0.1	0	0	0	0	0	0
	0	0	0	0	0	0	0	0	0	0	0	0
	0	0	0	0	0	0	0	0	0.1	0	0	0
	0	0	0	0	0	0	0	0	0	0	0	0
	0	0	0	0	0	0	0	0	0.1	0	0	0
	0	0	0	0	0	0.1	0	0	0	0	0	0
	0	0	0	0	0	0	0	0	0	0	0	0
	0	0	0	0	0	0	0	0	0	0	0	0
	0	0	0	0	0	0	0	0.1	0	0	0	0.1
	0	0	0.1	0	0	0	0	0	0	0	0	0
	0	0	0	0	0	0	0	0	0	0	0	0.1
	0	0	0.1	0	0	0	0	0	0	0	0	0
	0	0	0	0	0	0	0	0	0	0	0	0
	0	0	0.1	0	0	0	0	0	0	0	0	0
	0	0	0	0	0	0	0	0	0	0	0	0
	0	0	0	0	0	0	0	0	0	0	0	0
	0	0	0	0	0	0	0	0	0	0	0	0.1
	0	0	0	0	0	0	0	0	0	0	0	0
	0	0	0	0	0	0	0	0	0	0	0	0
	0	0	0	0	0	0	0	0	0	0	0	0
	0	0	0	0	0	0	0	0	0	0	0	0
	0	0	0	0	0	0	0	0	0	0	0	0
	0	0	0	0	0	0	0	0	0	0	0	0
	0	0	0.1	0	0	0	0	0	0	0	0	0
	0	0	0	0	0	0	0	0	0	0	0	0
	0	0	0	0	0	0	0	0	0	0	0	0
	0	0	0	0	0	0	0	0	0	0	0	0
	0	0	0	0	0	0	0	0	0	0	0	0
	0	0	0	0	0	0	0	0	0	0	0	0
	0	0	0.1	0	0	0	0	0	0	0	0	0.1
	0	0	0	0	0	0	0	0	0	0	0	0
	0	0	0	0	0	0	0	0	0	0	0	0
	0	0	0	0	0	0	0	0	0	0	0	0
	0	0	0.1	0	0	0	0	0	0	0	0	0
	0	0	0	0	0	0	0	0	0	0	0	0
	0	0	0	0	0	0	0	0	0	0	0	0
	0	0	0	0	0	0	0	0	0	0	0	0
	0	0	0	0	0	0.1	0	0	0	0	0	0
	0	0	0	0	0	0	0	0	0	0	0	0
	0	0	0	0	0	0	0	0	0	0	0	0
	0	0	0	0	0	0	0	0	0	0	0	0
	0	0	0.1	0	0	0	0	0	0	0	0	0
	0	0	0	0	0	0	0	0	0	0	0	0
	0	0	0	0	0	0	0	0	0	0	0	0
	0	0	0	0	0	0	0	0	0.1	0	0	0
	0	0	0	0	0	0	0	0	0	0	0	0
	0	0	0	0	0	0	0	0	0	0	0	0.1
	0	0	0	0	0	0	0	0	0	0	0	0
	0	0	0	0	0	0	0	0	0	0	0	0
	0	0	0	0	0	0	0	0	0	0	0	0
	0	0	0	0	0	0	0	0	0	0	0	0
	0	0	0	0	0	0	0	0	0	0	0	0
	0	0	0	0	0	0	0	0	0	0	0	0
	0	0	0	0	0	0	0	0	0	0	0	0
	0	0	0	0	0	0	0	0	0	0	0	0
	0	0	0.1	0	0	0	0	0	0	0	0	0
	0	0	0	0	0	0	0	0	0	0	0	0
	0	0	0	0	0	0	0	0	0	0	0	0
	0	0	0	0	0	0	0	0	0	0	0	0
	0	0	0	0	0	0	0	0	0.1	0	0	0
	0	0	0	0	0	0	0	0	0	0	0	0
	0	0	0	0	0	0	0	0	0	0	0	0
	0	0	0	0	0	0	0	0	0	0	0	0
	0	0	0	0	0	0	0	0	0	0	0	0
	0	0	0	0	0	0	0	0	0	0	0	0
	0	0	0	0	0	0	0	0	0	0	0	0
	0	0	0	0	0	0	0	0	0	0	0	0
	0	0	0	0	0	0	0	0	0	0	0	0
	0	0	0	0	0	0.1	0	0	0	0	0	0
	0	0	0	0	0	0	0	0	0	0	0	0
	0	0	0	0	0	0	0	0	0	0	0	0
	0	0	0	0	0	0	0	0	0	0	0	0
	0	0	0.1	0	0	0	0	0	0	0	0	0
	0	0	0	0	0	0	0	0	0	0	0	0
	0	0	0	0	0	0	0	0	0.1	0	0	0
	0	0	0	0	0	0	0	0	0	0	0	0.1
	0	0	0	0	0	0	0	0	0	0	0	0
	0	0	0	0	0	0	0	0	0	0	0	0
	0	0	0	0	0	0	0	0	0	0	0	0.1
	0	0	0	0	0	0	0	0	0	0	0	0.1
	0	0	0.1	0	0	0	0	0	0	0	0	0
	0	0	0	0	0	0	0	0	0	0	0	0
	0	0	0	0	0	0	0	0	0	0	0	0.1
	0	0	0	0	0	0	0	0	0	0	0	0
	0	0	0.1	0	0	0	0	0	0	0	0	0
	0	0	0	0	0	0	0	0	0	0	0	0
	0	0	0	0	0	0	0	0	0	0	0	0
	0	0	0	0	0	0	0	0	0	0	0	0
	0	0	0	0	0	0	0	0	0	0	0	0
	0	0	0	0	0	0	0	0	0	0	0	0.1
	0	0	0	0	0	0	0	0	0	0	0	0
	0	0	0	0	0	0	0	0	0	0	0	0
	0	0	0	0	0	0	0	0	0	0	0	0
	0	0	0	0	0	0	0	0	0	0	0	0
	0	0	0	0	0	0	0	0	0	0	0	0
	0	0	0	0	0	0	0	0	0	0	0	0
	0	0	0	0	0	0	0	0	0	0	0	0
	0	0	0	0	0	0	0	0.1	0	0	0	0.1
	0	0	0	0	0	0	0	0	0	0	0	0
	0	0	0	0	0	0	0	0	0	0	0	0
	0	0	0	0	0	0	0	0	0	0	0	0
	0	0	0	0	0	0	0	0	0	0	0	0
	0	0	0	0	0	0	0	0	0	0	0	0
	0	0	0	0	0	0	0	0	0	0	0	0
	0	0	0	0	0	0	0	0	0	0	0	0.1
	0	0	0	0	0	0	0	0	0	0	0	0.1
	0	0	0	0	0	0	0	0	0	0	0	0
	0	0	0	0	0	0	0	0	0	0	0	0
	0	0	0	0	0	0	0	0	0	0	0	0.1
	0	0	0	0	0	0	0	0	0	0	0	0
	0	0	0	0	0	0	0	0	0	0	0	0
	0	0	0	0	0	0	0	0	0	0	0	0
	0	0	0	0	0	0	0	0	0	0	0	0
	0	0	0	0	0	0	0	0	0	0	0	0.1
	0	0	0	0	0	0	0	0	0	0	0	0.1
	0	0	0	0	0	0	0	0	0	0	0	0
	0	0	0	0	0	0	0	0	0.1	0	0	0
	0	0	0	0	0	0	0	0	0	0	0	0
	0	0	0.1	0	0	0	0	0	0	0	0	0
	0	0	0.1	0	0	0	0	0	0	0	0	0.1
	0	0	0	0	0	0	0	0	0	0	0	0
	0	0	0	0	0	0.1	0	0	0	0	0	0
	0	0	0	0	0	0	0	0	0	0	0	0
	0	0	0	0	0	0	0	0	0	0	0	0
	0	0	0	0	0	0	0	0	0	0	0	0
	0	0	0	0	0	0	0	0	0	0	0	0
	0	0	0	0	0	0	0	0	0	0	0	0
	0	0	0	0	0	0	0	0	0	0	0	0
	0	0	0	0	0	0	0	0	0.1	0	0	0
	0	0	0	0	0	0	0	0	0	0	0	0.1
	0	0	0	0	0	0	0	0	0	0	0	0
	0	0	0	0	0	0	0	0	0	0	0	0
	0	0	0	0	0	0	0	0	0	0	0	0.1
	0	0	0.1	0	0	0	0	0	0	0	0	0
	0	0	0	0	0	0	0	0	0	0	0	0.1
	0	0	0	0	0	0	0	0	0	0	0	0
	0	0	0	0	0	0	0	0	0	0	0	0
	0	0	0	0	0	0	0	0	0	0	0	0
	0	0	0	0	0	0	0	0	0	0	0	0
	0	0	0	0	0	0	0	0	0	0	0	0.1
	0	0	0.1	0	0	0	0	0	0	0	0	0
	0	0	0.1	0	0	0	0	0	0	0	0	0
	0	0	0	0	0	0	0	0	0	0	0	0
	0	0	0	0	0	0	0	0	0	0	0	0.1
	0	0	0	0	0	0	0	0	0	0	0	0.1
	0	0	0	0	0	0	0	0	0	0	0	0
	0	0	0	0	0	0	0	0	0	0	0	0
	0	0	0	0	0	0	0	0	0	0	0	0
	0	0	0	0	0	0	0	0	0	0	0	0
	0	0	0	0	0	0	0	0	0	0	0	0
	0	0	0	0	0	0	0	0	0	0	0	0
	0	0	0	0	0	0	0	0	0	0	0	0
	0	0	0	0	0	0	0	0	0	0	0	0
	0	0	0	0	0	0	0	0	0	0	0	0.1
	0	0	0.1	0	0	0	0	0	0	0	0	0.1
	0	0	0.1	0	0	0.1	0	0	0	0	0	0.1
	0	0	0	0	0	0	0	0	0	0	0	0
	0	0	0	0	0	0	0	0	0	0	0	0
	0	0	0	0	0	0	0	0	0	0	0	0
	0	0	0	0	0	0	0	0	0	0	0	0.1
	0	0	0	0	0	0	0	0	0	0	0	0
	0	0	0.1	0	0	0	0	0	0.1	0	0	0.1
	0	0	0	0	0	0	0	0	0	0	0	0
	0	0	0	0	0	0	0	0	0	0	0	0
	0	0	0	0	0	0	0	0	0	0	0	0
	0	0	0	0	0	0	0	0	0	0	0	0
	0	0	0	0	0	0	0	0	0	0	0	0.1
	0	0	0	0	0	0	0	0	0	0	0	0
	0	0	0	0	0	0	0	0	0	0	0	0.1
	0	0	0	0	0	0	0	0	0	0	0	0
	0	0	0	0	0	0	0	0	0	0	0	0
	0	0	0	0	0	0	0	0	0	0	0	0
	0	0	0	0	0	0	0	0	0	0	0	0.1
	0	0	0	0	0	0	0	0	0.1	0	0	0
	0	0	0	0	0	0	0	0	0	0	0	0
	0	0	0	0	0	0	0	0	0	0	0	0
	0	0	0	0	0	0	0	0	0	0	0	0
	0	0	0	0	0	0	0	0	0.1	0	0	0
	0	0	0	0	0	0	0	0	0	0	0	0.1
	0	0	0	0	0	0	0	0	0	0	0	0.1
	0	0	0	0	0	0	0	0	0	0	0	0
	0	0	0.1	0	0	0	0	0	0	0	0	0
	0	0	0	0	0	0	0	0	0	0	0	0
	0	0	0	0	0	0	0	0	0	0	0	0
	0	0	0	0	0	0	0	0	0	0	0	0
	0	0	0	0	0	0	0	0	0	0	0	0
	0	0	0	0	0	0	0	0	0	0	0	0
	0	0	0	0	0	0	0	0	0	0	0	0.1
	0	0	0	0	0	0	0	0	0	0	0	0.1
	0	0	0	0	0	0	0	0	0	0	0	0
	0	0	0.1	0	0	0	0	0	0	0	0	0.1
	0	0	0	0	0	0	0	0	0	0	0	0.1
	0	0	0	0	0	0	0	0	0	0	0	0
	0	0	0	0	0	0	0	0	0	0	0	0
	0	0	0.1	0	0	0	0	0	0	0	0	0
	0	0	0	0	0	0	0	0	0	0	0	0
	0	0	0	0	0	0	0	0	0	0	0	0
	0	0	0.1	0	0	0	0	0	0	0	0	0
	0	0	0	0	0	0	0	0	0	0	0	0
	0	0	0	0	0	0	0	0	0	0	0	0
	0	0	0	0	0	0	0	0	0	0	0	0.1
	0	0	0	0	0	0	0	0	0	0	0	0
	0	0	0	0	0	0	0	0	0	0	0	0
	0	0	0	0	0	0	0	0	0	0	0	0.1
	0	0	0	0	0	0	0	0	0	0	0	0
	0	0	0	0	0	0	0	0	0	0	0	0.1
	0	0	0	0	0	0	0	0.1	0	0	0	0
	0	0	0	0	0	0	0	0	0	0	0	0
	0	0	0	0	0	0	0	0	0	0	0	0
	0	0	0	0	0	0	0	0	0	0	0	0
	0	0	0.1	0	0	0	0	0	0	0	0	0
	0	0	0	0	0	0	0	0	0	0	0	0
	0	0	0.1	0	0	0	0	0	0	0	0	0
	0	0	0	0	0	0	0	0	0	0	0	0
	0	0	0.1	0	0	0	0	0	0	0	0	0
	0	0	0	0	0	0	0	0	0	0	0	0
	0	0	0	0	0	0	0	0	0	0	0	0.1
	0	0	0	0	0	0	0	0	0	0	0	0
	0	0	0	0	0	0	0	0	0	0	0	0.1
	0	0	0	0	0	0	0	0	0	0	0	0
	0	0	0	0	0	0	0	0	0	0	0	0
	0	0	0	0	0	0	0	0	0	0	0	0
	0	0	0	0	0	0	0	0	0	0	0	0
	0	0	0	0	0	0	0	0	0	0	0	0
	0	0	0	0	0	0	0	0	0	0	0	0.1
	0	0	0	0	0	0	0	0	0	0	0	0
	0	0	0	0	0	0	0	0	0	0	0	0
	0	0	0	0	0	0	0	0	0	0	0	0.1
	0	0	0	0	0	0	0	0	0	0	0	0.1
	0	0	0.1	0	0	0	0	0	0	0	0	0
	0	0	0	0	0	0	0	0	0	0	0	0
	0	0	0	0	0	0	0	0	0	0	0	0
	0	0	0	0	0	0	0	0	0	0	0	0.1
	0	0	0	0	0	0	0	0	0	0	0	0.1
	0	0	0.1	0	0	0	0	0	0	0	0	0.1
	0	0	0	0	0	0	0	0	0	0	0	0
	0	0	0	0	0	0	0	0	0.1	0	0	0
	0	0	0	0	0	0	0	0	0	0	0	0
	0	0	0	0	0	0	0	0	0	0	0	0.1
	0	0	0.1	0	0	0	0	0	0	0	0	0
	0	0	0	0	0	0	0	0	0	0	0	0.1
	0	0	0	0	0	0	0	0	0	0	0	0.1
	0	0	0.1	0	0	0	0	0	0	0	0	0
	0	0	0	0	0	0	0	0	0	0	0	0
	0	0	0	0	0	0	0	0	0.1	0	0	0
	0	0	0	0	0	0	0	0	0	0	0	0
	0	0	0	0	0	0	0	0	0	0	0	0
	0	0	0	0	0	0	0	0	0	0	0	0.1
	0	0	0	0	0	0	0	0	0	0	0	0.1
	0	0	0	0	0	0	0	0	0	0	0	0
	0	0	0	0	0	0	0	0	0	0	0	0.1
	0	0	0.1	0	0	0	0	0	0	0	0	0
	0	0	0.1	0	0	0	0	0	0	0	0	0
	0	0	0	0	0	0	0	0	0	0	0	0.1
	0	0	0.1	0	0	0	0	0	0	0	0	0.1
	0	0	0	0	0	0	0	0	0	0	0	0.1
	0	0	0.1	0	0	0	0	0	0	0	0	0
	0	0	0.1	0	0	0	0	0	0	0	0	0
	0	0	0.1	0	0	0	0	0	0	0	0	0.1
	0	0	0	0	0	0	0	0	0	0	0	0
	0	0	0	0	0	0	0	0	0	0	0	0.1
	0	0	0	0	0	0	0	0	0	0	0	0
	0	0	0	0	0	0	0	0	0	0	0	0
	0	0	0	0	0	0.1	0	0	0	0	0	0.1
	0	0	0	0	0	0	0	0	0	0	0	0
	0	0	0	0	0	0	0	0	0	0	0	0
	0	0	0	0	0	0	0	0	0	0	0	0.1
	0	0	0	0	0	0	0	0	0	0	0	0
	0	0	0	0	0	0	0	0	0	0	0	0
	0	0	0	0	0	0	0	0	0	0	0	0
	0	0	0	0	0	0	0	0	0	0	0	0
	0	0	0.1	0	0	0	0	0	0	0	0	0
	0	0	0	0	0	0	0	0	0	0	0	0.1
	0	0	0	0	0	0	0	0	0	0	0	0
	0	0	0	0	0	0.1	0	0	0	0	0	0
	0	0	0	0	0	0	0	0	0	0	0	0
	0	0	0	0	0	0	0	0	0	0	0	0.1
	0	0	0.1	0	0	0	0	0	0	0	0	0
	0	0	0	0	0	0	0	0	0	0	0	0
	0	0	0	0	0	0	0	0	0	0	0	0
	0	0	0	0	0	0	0	0	0	0	0	0
	0	0	0	0	0	0	0	0	0	0	0	0
	0	0	0	0	0	0	0	0	0	0	0	0.1
	0	0	0	0	0	0	0	0	0	0	0	0
	0	0	0	0	0	0	0	0	0	0	0	0.1
	0	0	0	0	0	0	0	0	0	0	0	0.1
	0	0	0	0	0	0	0	0	0	0	0	0
	0	0	0	0	0	0	0	0	0	0	0	0
	0	0	0	0	0	0	0	0.1	0	0	0	0.1
	0	0	0.1	0	0	0	0	0	0	0	0	0
	0	0	0	0	0	0	0	0	0	0	0	0
	0	0	0	0	0	0	0	0	0	0	0	0
	0	0	0.1	0	0	0	0	0	0	0	0	0
	0	0	0.1	0	0	0	0	0	0	0	0	0
	0	0	0.1	0	0	0	0	0	0	0	0	0.1
	0	0	0	0	0	0	0	0	0	0	0	0.1
	0	0	0.1	0	0	0	0	0	0	0	0	0.1
	0	0	0	0	0	0	0	0	0	0	0	0.1
	0	0	0.1	0	0	0	0	0	0.1	0	0	0.1
	0	0	0	0	0	0	0	0	0	0	0	0
	0	0	0	0	0	0	0	0	0	0	0	0
	0	0	0	0	0	0	0	0	0	0	0	0.1
	0	0	0	0	0	0	0	0	0	0	0	0
	0	0	0	0	0	0	0	0	0	0	0	0
	0	0	0.1	0	0	0	0	0	0	0	0	0.1
	0	0	0	0	0	0	0	0	0	0	0	0
	0	0	0.1	0	0	0	0	0	0	0	0	0
	0	0	0	0	0	0	0	0	0	0	0	0.1
	0	0	0.1	0	0	0	0	0	0	0	0	0
	0	0	0	0	0	0	0	0	0	0	0	0
	0	0	0	0	0	0	0	0	0	0	0	0
	0	0	0	0	0	0	0	0	0	0	0	0
	0	0	0	0	0	0	0	0	0	0	0	0.1
	0	0	0.1	0	0	0	0	0	0	0	0	0.1
	0	0	0	0	0	0	0	0	0	0	0	0
	0	0	0.1	0	0	0	0	0	0	0	0	0
	0	0	0	0	0	0	0	0	0	0	0	0
	0	0	0.1	0	0	0	0	0	0	0	0	0.1
	0	0	0	0	0	0	0	0	0	0	0	0.1
	0	0	0.1	0	0	0	0	0	0	0	0	0
	0	0	0.1	0	0	0	0	0	0.1	0	0	0.1
	0	0	0	0	0	0.1	0	0	0	0	0	0.1
	0	0	0.1	0	0	0	0	0	0	0	0	0
	0	0	0	0	0	0	0	0	0	0	0	0.1
	0	0	0	0	0	0	0	0	0	0	0	0.1
	0	0	0	0	0	0	0	0	0	0	0	0
	0	0	0.1	0	0	0	0	0	0	0	0	0.1
	0	0	0.1	0	0	0	0	0	0	0	0	0
	0	0	0	0	0	0	0	0	0	0	0	0
	0	0	0	0	0	0	0	0	0	0	0	0
	0	0	0	0	0	0	0	0	0	0	0	0
	0	0	0	0	0	0	0	0	0	0	0	0
	0	0	0	0	0	0	0	0	0	0	0	0.1
	0	0	0.1	0	0	0	0	0	0	0	0	0
	0	0	0	0	0	0	0	0	0	0	0	0.1
	0	0	0.1	0	0	0	0	0	0	0	0	0
	0	0	0.1	0	0	0	0	0	0	0	0	0
	0	0	0	0	0	0	0	0	0	0	0	0
	0	0	0	0	0	0	0	0	0	0	0	0.1
	0	0	0.1	0	0	0	0	0	0	0	0	0.1
	0	0	0	0	0	0	0	0	0	0	0	0
	0	0	0	0	0	0	0	0	0	0	0	0.1
	0	0	0.1	0	0	0	0	0	0	0	0	0
	0	0	0	0	0	0	0	0	0	0	0	0.1
	0	0	0.1	0	0	0	0	0	0	0	0	0
	0	0	0	0	0	0	0	0	0	0	0	0
	0	0	0.1	0	0	0	0	0	0	0	0	0
	0	0	0.1	0	0	0	0.3	0.6	0	0	0	0
	0	0	0.1	0	0	0	0	0	0	0	0	0
	0	0	0	0	0	0	0	0	0.1	0	0	0
	0	0	0	0	0	0	0	0	0	0	0	0
	0	0	0.1	0	0	0	0	0	0	0	0	0
	0	0	0.1	0	0	0	0	0	0	0	0	0
	0	0	0.1	0	0	0	0	0	0	0	0	0.1
	0	0	0.1	0	0	0.1	0	0	0	0	0	0
	0	0	0.1	0	0	0	0	0	0	0	0	0.1
	0	0	0	0	0	0	0	0	0	0	0	0.1
	0	0	0	0	0	0	0	0	0.1	0	0	0.1
	0	0	0	0	0	0	0	0	0	0	0	0
	0	0	0.1	0	0	0	0	0	0	0	0	0
	0	0	0	0	0	0	0	0	0	0	0	0.1
	0	0	0	0	0	0	0	0	0	0	0	0
	0	0	0	0	0	0	0	0	0	0	0	0
	0	0	0	0	0	0	0	0	0	0	0	0
	0	0	0	0	0	0	0	0	0	0	0	0
	0	0	0	0	0	0	0	0	0	0	0	0
	0	0	0.1	0	0.1	0.1	0	0	0	0	0	0
	0	0	0	0	0	0	0	0	0	0	0	0
	0	0	0	0	0	0	0	0	0	0	0	0.1
	0	0	0.1	0	0	0	0	0	0	0	0	0.1
	0	0	0.1	0	0	0	0	0	0	0	0	0
	0	0	0	0	0	0	0	0	0	0	0	0.1
	0	0	0.1	0	0	0	0	0	0	0	0	0.1
	0	0	0	0	0	0	0	0	0	0	0	0
	0	0	0	0	0	0	0	0	0	0	0	0
	0	0	0	0	0	0	0	0	0	0	0	0.1
	0	0	0	0	0	0	0	0	0	0	0	0
	0	0	0	0	0	0	0	0	0	0	0	0.1
	0	0	0	0	0	0	0	0	0	0	0	0
	0	0	0.1	0	0	0	0	0	0	0	0	0
	0	0	0	0	0	0	0	0	0	0	0	0.1
	0	0	0	0	0	0	0	0	0	0	0	0
	0	0	0	0	0	0	0	0	0	0	0	0
	0	0	0.1	0	0	0.1	0	0	0	0	0	0.1
	0	0	0	0	0	0.1	0	0	0	0	0	0
	0	0	0.1	0	0	0	0	0	0	0	0	0.1
	0	0	0.1	0	0	0	0	0	0	0	0	0
	0	0	0	0	0	0	0	0	0	0	0	0
	0	0	0	0	0	0	0	0	0	0	0	0.1
	0	0	0	0	0	0	0	0	0	0	0.3	0.1
	0	0	0	0	0	0	0	0	0	0	0	0.1
	0	0	0	0	0	0	0	0	0	0	0	0
	0	0	0	0	0	0	0	0	0	0	0	0.1
	0	0	0	0	0	0	0	0	0	0	0	0.1
	0	0	0	0	0	0	0	0	0	0.1	0.1	0.1
	0	0	0	0	0	0	0	0	0	0	0	0
	0	0	0.1	0	0	0	0	0	0	0	0	0
	0	0	0.1	0	0	0	0	0	0	0	0	0.1
	0	0	0.1	0	0	0.1	0	0	0	0	0	0
	0	0	0.1	0	0	0	0	0	0	0	0	0
	0	0	0	0	0	0	0	0	0	0	0	0
	0	0	0	0	0	0	0	0	0	0	0	0
	0	0	0	0	0	0	0	0	0	0	0	0.1
	0	0	0.1	0	0	0	0	0	0	0	0	0
	0	0	0.1	0	0	0	0	0	0	0	0	0.1
	0	0	0	0	0	0	0	0	0	0	0	0
	0	0	0	0	0	0	0	0	0	0	0	0
	0	0	0.1	0	0	0.1	0	0	0	0	0	0.1
	0	0	0.1	0	0	0	0	0	0	0	0	0
	0	0	0.1	0	0	0.1	0	0	0	0	0	0.1
	0	0	0.1	0	0	0	0	0	0	0	0	0
	0	0	0	0	0	0.1	0	0	0	0	0	0.1
	0	0	0	0	0	0	0	0	0	0	0	0
	0	0	0.1	0	0	0	0	0	0	0	0	0
	0	0	0.1	0	0	0	0	0	0	0	0	0.1
	0	0	0.1	0	0	0	0	0	0	0	0	0.1
	0	0	0.1	0	0	0	0	0	0	0	0	0.1
	0	0	0.1	0	0	0	0	0	0	0	0	0
	0	0	0	0	0	0	0	0	0	0	0	0
	0	0	0.1	0	0	0	0	0	0	0	0	0
	0	0	0	0	0	0	0	0	0	0	0	0
	0	0	0	0	0	0	0	0	0	0	0	0
	0	0	0	0	0	0.1	0	0	0	0	0	0
	0	0	0.1	0	0	0	0	0	0	0	0	0.1
	0	0	0.1	0	0	0	0	0	0	0	0	0.1
	0	0	0.1	0	0	0	0	0	0	0	0	0.1
	0	0	0	0	0	0	0	0	0	0	0	0.1
	0	0	0.1	0	0	0	0	0.1	0.1	0	0	0.1
	0	0	0.1	0	0	0	0	0	0	0	0	0
	0	0	0	0	0	0.1	0	0	0	0	0	0
	0	0	0	0	0	0	0	0	0	0	0	0.1
	0	0	0.1	0	0	0.1	0	0	0	0	0	0
	0	0	0.1	0	0	0	0	0	0	0	0	0
	0	0	0	0	0	0	0	0	0	0	0	0
	0	0	0	0	0	0	0	0	0	0	0	0
	0	0	0.1	0	0	0	0	0	0	0	0	0
	0	0	0.1	0	0	0	0	0	0	0	0	0.1
	0	0	0.1	0	0	0	0	0	0	0	0	0.1
	0	0	0	0	0	0	0	0	0	0	0	0
	0	0	0	0	0	0	0	0	0	0	0	0
	0	0	0	0	0	0	0	0	0	0	0	0.1
	0	0	0	0	0	0	0	0	0	0	0	0.1
	0	0	0	0	0	0	0	0	0	0	0	0.1
	0	0	0.1	0	0	0	0	0	0	0	0	0
	0	0	0	0	0	0	0	0	0	0	0	0.1
	0	0	0.1	0	0	0	0	0	0	0	0	0.1
	0	0	0.1	0	0	0.1	0	0	0	0	0	0
	0	0	0	0	0	0	0	0	0	0	0	0.1
	0	0	0.1	0	0	0	0	0	0	0	0	0.1
	0	0	0	0	0	0	0	0	0	0	0	0.1
	0	0	0.1	0	0	0	0	0	0	0	0	0
	0	0	0	0	0	0	0	0	0	0	0	0.1
	0	0	0	0	0	0.1	0	0	0	0	0	0
	0	0	0	0	0	0	0	0	0	0	0	0
	0	0	0.1	0	0	0.1	0	0	0	0	0	0
	0	0	0	0	0	0	0	0	0	0	0	0.1
	0	0	0	0	0	0	0	0	0	0	0	0.1
	0	0	0	0	0	0	0	0	0	0	0	0
	0	0	0	0	0	0	0	0	0	0	0	0.1
	0	0	0.1	0	0	0	0	0	0	0	0	0
	0	0	0	0	0	0	0	0	0	0	0	0.1
	0	0	0	0.3	0.6	0	0	0	0	0	0	0.1
	0	0	0.1	0	0	0	0	0	0	0	0	0.1
	0	0	0	0	0	0	0	0	0	0	0	0.1
	0	0	0	0	0	0	0	0	0	0	0	0.1
	0	0	0.1	0	0	0	0	0	0	0	0	0.1
	0	0	0.1	0	0	0	0	0	0	0	0	0.1
	0	0	0	0	0	0	0	0	0	0	0	0
	0	0	0.1	0	0	0	0	0	0	0	0	0
	0	0	0	0	0	0	0	0	0	0	0	0.1
	0	0	0	0	0	0	0	0	0	0	0	0
	0	0	0.1	0	0	0	0	0	0	0	0	0.1
	0	0	0.1	0	0	0	0	0	0	0	0	0
	0	0	0.1	0	0	0	0	0	0.1	0	0	0
	0	0	0	0	0	0	0	0	0	0	0	0.1
	0	0	0.1	0	0	0	0	0	0	0	0	0
	0	0	0	0	0	0	0	0	0	0	0	0.1
	0	0	0.1	0	0	0	0	0	0	0	0	0
	0	0	0	0	0	0	0	0	0	0	0	0
	0	0	0.1	0	0	0	0	0	0	0	0	0.1
	0	0	0	0	0	0	0	0	0	0	0	0.1
	0	0	0.1	0	0	0	0	0	0	0	0	0
	0	0	0.1	0	0	0	0	0	0	0	0	0
	0	0	0	0	0	0.1	0	0	0	0	0	0
	0	0	0.1	0	0	0	0	0	0	0	0	0
	0	0	0.1	0	0	0	0	0	0	0	0	0.1
	0	0	0.1	0	0	0	0	0	0	0	0	0
	0	0	0	0	0	0	0	0	0	0	0	0.1
	0	0	0.1	0	0	0	0	0	0.1	0	0	0
	0	0	0.1	0	0	0	0	0	0	0	0	0.1
	0	0	0	0	0	0	0	0	0	0	0	0.1
	0	0	0	0	0	0	0	0	0	0	0	0.1
	0	0	0	0	0	0	0	0	0	0	0	0.1
	0	0	0	0	0	0	0	0	0	0	0	0.1
	0	0	0.1	0	0	0	0	0	0	0	0	0.1
	0	0	0.1	0	0	0	0	0	0	0	0	0.1
	0	0	0	0	0	0	0	0	0.1	0	0	0.1
	0	0	0.1	0	0	0	0	0	0	0	0	0
	0	0	0.1	0	0	0	0	0	0	0	0	0
	0	0	0	0	0	0	0	0	0	0	0	0
	0	0	0.1	0	0	0	0	0	0	0	0	0.1
	0	0	0.1	0	0	0	0	0	0	0	0	0.1
	0	0	0	0	0	0	0	0	0	0	0	0
	0	0	0	0	0	0	0	0	0	0	0	0.1
	0	0	0	0	0	0	0	0	0	0	0	0.1
	0	0	0.1	0	0	0	0	0	0	0	0	0
	0	0	0	0	0	0	0	0	0	0	0	0
	0	0	0.1	0	0	0	0	0	0	0	0	0.1
	0	0	0	0	0	0	0	0	0	0	0	0
	0	0	0.1	0	0	0	0	0	0	0	0	0
	0	0	0	0	0	0	0	0	0	0	0	0.1
	0	0	0	0	0	0	0	0	0	0	0	0
	0	0	0.1	0	0	0	0	0	0	0	0	0.1
	0	0	0	0	0	0	0	0	0	0	0	0
	0	0	0	0	0	0	0	0	0	0	0	0.1
	0	0	0	0	0	0	0	0	0	0	0	0.1
	0	0	0	0	0	0	0	0	0	0	0	0.1
	0	0	0.1	0	0	0	0	0	0.1	0	0	0.1
	0	0	0.1	0	0	0	0	0	0	0	0	0
	0	0	0	0	0	0	0	0	0	0	0	0.1
	0	0	0	0	0	0	0	0	0	0	0	0.1
	0	0	0	0	0	0	0	0	0	0	0	0.1
	0	0	0.1	0	0	0	0	0	0	0	0	0.1
	0	0	0.1	0	0	0	0	0	0.1	0	0	0
	0	0	0.1	0	0	0	0	0	0.1	0	0	0.1
	0	0	0	0	0	0	0	0	0	0	0	0
	0	0	0	0	0	0	0	0	0	0	0	0.1
	0	0	0.1	0	0	0	0	0	0	0	0	0
	0	0	0.1	0	0	0	0	0	0	0	0	0.1
	0	0	0	0	0	0.1	0	0	0	0	0	0.1
	0	0	0.1	0	0	0	0	0	0	0	0	0.1
	0	0	0.1	0	0	0	0	0	0	0	0	0
	0	0	0	0	0	0.1	0	0	0	0	0	0.1
	0	0	0	0	0	0	0	0	0	0	0	0
	0	0	0	0	0	0	0	0	0	0	0	0.1
	0	0	0	0	0	0	0	0	0	0	0	0
	0	0	0.1	0	0	0	0	0	0	0	0	0
	0	0	0	0	0	0	0	0	0	0	0	0.1
	0	0	0.1	0	0	0	0	0	0	0	0	0.1
	0	0	0	0	0	0	0	0	0	0	0	0.1
	0	0	0	0	0	0	0	0	0	0	0	0.1
	0	0	0	0	0	0	0	0	0	0	0	0
	0	0	0.1	0	0	0	0	0	0	0	0	0
	0	0	0	0	0	0	0	0	0	0	0	0.1
	0	0	0.1	0	0	0	0	0	0	0	0	0.1
	0	0	0	0	0	0	0	0	0	0	0	0
	0	0	0	0	0	0	0	0	0	0	0	0.1
	0	0	0.1	0	0	0	0	0	0	0	0	0.1
	0	0	0.1	0	0	0	0	0	0	0	0	0.1
	0	0	0	0	0	0	0	0	0	0	0	0
	0	0	0.1	0	0	0	0	0	0	0	0	0.1
	0	0	0	0	0	0	0	0	0	0	0	0
	0	0	0	0	0	0	0	0	0	0	0	0
	0	0	0.1	0	0	0	0	0	0	0	0	0.1
	0	0	0	0	0	0	0	0	0	0	0	0
	0	0	0.1	0	0	0	0	0	0	0	0	0.1
	0	0	0	0	0	0	0	0	0	0	0	0.1
	0	0	0.1	0	0	0	0	0	0	0	0	0.1
	0	0	0.1	0	0	0	0	0	0	0	0	0.1
	0	0	0.1	0	0	0	0	0	0	0	0	0
	0	0	0.1	0	0	0	0	0	0.1	0	0	0.1
	0	0	0.1	0	0	0	0	0	0	0	0	0
	0	0	0	0	0	0	0	0	0	0	0	0.1
	0	0	0.1	0	0	0	0	0	0	0	0	0
	0	0	0.1	0	0	0	0	0	0	0	0	0
	0	0	0.1	0	0	0	0	0	0	0	0	0
	0	0	0.1	0	0	0	0	0	0	0	0	0.1
	0	0	0	0	0	0	0	0	0	0	0	0
[truncated: 661 more rows]

## Sheet: sand
ug/m^3	4ms	1/8
PM	10	2.5	1	10	2.5	1	10	2.5	1	10	2.5	1		Total	PM10	1273
	0	0	0	0	0	0	0	0	0	0	0	0		142.5	149.1	58.4	8.3
	0	0	0	0.1	0.1	0.1	0.1	0.1	0.1	0	0	0
	0	0	0	0	0	0	0	0	0	0	0	0		89.575	34.061
	0	0	0	0.2	0.2	0.1	0	0	0	0	0	0
	0.1	0.1	0.1	0	0	0	0	0	0	0	0	0
	0	0	0	0	0	0	0	0	0	0	0	0
	0	0	0	0	0	0	0.1	0.1	0.1	0	0	0
	0	0	0	4.9	0.5	0.1	0.1	0.1	0.1	0	0	0
	0.1	0.1	0.1	0	0	0	0	0	0	0	0	0
	0.1	0.1	0.1	0	0	0	0.1	0.1	0.1	0	0	0
	0	0	0	0.9	0.6	0	0	0	0	0	0	0
	0.1	0.1	0.1	0	0	0	0	0	0	0	0	0
	0.1	0.1	0.1	0	0	0	0.1	0.1	0.1	0	0	0
	0.1	0.1	0.1	2	1.2	0.1	0	0	0	0	0	0
	0.1	0.1	0	0.1	0.1	0.1	0	0	0	0	0	0
	0	0	0	0	0	0	0	0	0	0	0	0
	0.1	0.1	0.1	0.1	0.1	0.1	0	0	0	0.1	0.1	0
	0.1	0.1	0.1	1	0.6	0.1	0	0	0	0	0	0
	0.1	0.1	0.1	0	0	0	0	0	0	0	0	0
	0.1	0.1	0.1	0	0	0	0	0	0	0	0	0
	0	0	0	0.1	0.1	0.1	0	0	0	0.4	0.3	0
	0.1	0.1	0.1	0	0	0	0.2	0.2	0.1	0	0	0
	0	0	0	0	0	0	0	0	0	0	0	0
	0	0	0	0.2	0.2	0.1	0	0	0	0	0	0
	0	0	0	1.1	1	0.1	0.1	0.1	0.1	0.7	0.5	0
	0	0	0	0.1	0.1	0.1	0	0	0	0	0	0
	0.1	0.1	0.1	0	0	0	0	0	0	0	0	0
	0	0	0	0	0	0	0	0	0	0	0	0
	0	0	0	0	0	0	0	0	0	0	0	0
	0	0	0	0.4	0.3	0	0.7	0.5	0	0	0	0
	0.1	0.1	0.1	0.4	0.3	0	0	0	0	0	0	0
	0.1	0.1	0.1	0	0	0	0	0	0	0.1	0.1	0.1
	0	0	0	0	0	0	0	0	0	0	0	0
	0	0	0	0.1	0.1	0.1	0.1	0.1	0.1	0	0	0
	0	0	0	0.1	0.1	0.1	0	0	0	0	0	0
	0.1	0.1	0.1	0	0	0	0.1	0.1	0.1	0	0	0
	0	0	0	0.1	0.1	0.1	1.1	0.8	0.1	0	0	0
	0	0	0	0	0	0	0.1	0.1	0.1	0	0	0
	0.1	0.1	0.1	0	0	0	0	0	0	0	0	0
	0	0	0	0	0	0	0	0	0	0	0	0
	0.1	0.1	0.1	0.1	0.1	0.1	0	0	0	0	0	0
	0	0	0	0.1	0.1	0.1	0	0	0	0	0	0
	0.1	0.1	0.1	0.1	0.1	0.1	0	0	0	0	0	0
	0	0	0	0.1	0.1	0.1	0	0	0	0	0	0
	0	0	0	0	0	0	0	0	0	0	0	0
	0.1	0.1	0.1	1.3	0.7	0.1	0.1	0.1	0.1	0	0	0
	0.1	0.1	0.1	0	0	0	0	0	0	0	0	0
	0.1	0.1	0.1	0	0	0	0.1	0.1	0.1	0	0	0
	0	0	0	0	0	0	0.1	0.1	0.1	0	0	0
	0	0	0	1	0.6	0.1	0	0	0	0	0	0
	0	0	0	0	0	0	0.2	0.2	0.1	0	0	0
	0.1	0.1	0.1	0	0	0	0.1	0.1	0.1	0	0	0
	0.1	0.1	0.1	0.9	0.6	0	0	0	0	0	0	0
	0	0	0	0.1	0.1	0.1	0	0	0	0	0	0
	0.1	0.1	0.1	0.1	0.1	0.1	0	0	0	0	0	0
	0.1	0.1	0.1	0	0	0	0	0	0	0	0	0
	0.1	0.1	0.1	0	0	0	0.1	0.1	0.1	0	0	0
	0	0	0	1	0.6	0.1	0	0	0	0	0	0
	0.1	0.1	0.1	0	0	0	0	0	0	0	0	0
	0.1	0.1	0.1	0.1	0.1	0.1	0.1	0.1	0.1	0	0	0
	0.1	0.1	0.1	0.1	0.1	0.1	0	0	0	0	0	0
	0.1	0.1	0.1	0.1	0.1	0.1	0	0	0	0	0	0
	0.4	0.4	0.1	0	0	0	0.1	0.1	0.1	0.1	0.1	0.1
	0	0	0	0.1	0.1	0.1	0	0	0	0	0	0
	0.1	0.1	0.1	0.1	0.1	0.1	0.1	0.1	0.1	0	0	0
	0.1	0.1	0.1	0.1	0.1	0.1	0.7	0.6	0.1	0	0	0
	0.1	0.1	0.1	0	0	0	0.1	0.1	0.1	0	0	0
	0.1	0.1	0.1	0	0	0	0.9	0.6	0	0.1	0.1	0
	0.1	0.1	0.1	0.1	0.1	0.1	0	0	0	0	0	0
	0	0	0	0	0	0	0.1	0.1	0.1	0	0	0
	0.1	0.1	0.1	0	0	0	0.1	0.1	0.1	0	0	0
	0	0	0	0	0	0	0.1	0.1	0.1	0	0	0
	0	0	0	0.1	0.1	0.1	0.1	0.1	0.1	0	0	0
	0.1	0.1	0.1	0	0	0	0.1	0.1	0.1	0	0	0
	0	0	0	0	0	0	0.1	0.1	0.1	0	0	0
	0.1	0.1	0.1	0.1	0.1	0.1	0.1	0.1	0.1	0	0	0
	0.1	0.1	0.1	0	0	0	0	0	0	0	0	0
	0.1	0.1	0.1	0	0	0	0	0	0	0	0	0
	0.1	0.1	0.1	0.1	0.1	0.1	0	0	0	0	0	0
	0.1	0.1	0.1	0	0	0	0.1	0.1	0.1	0	0	0
	0.1	0.1	0.1	0.1	0.1	0.1	0	0	0	0	0	0
	0.1	0.1	0.1	0	0	0	0.1	0.1	0.1	0	0	0
	0	0	0	0.1	0.1	0.1	0	0	0	0	0	0
	0	0	0	0	0	0	0.1	0.1	0.1	0	0	0
	0	0	0	0.9	0.6	0	0.1	0.1	0.1	0	0	0
	0	0	0	0	0	0	0	0	0	0	0	0
	0	0	0	0.9	0.6	0	0.1	0.1	0.1	0	0	0
	0	0	0	0	0	0	0.1	0.1	0.1	0	0	0
	0.1	0.1	0.1	0	0	0	0.1	0.1	0.1	0	0	0
	0.1	0.1	0.1	0.1	0.1	0.1	0	0	0	0	0	0
	0	0	0	0	0	0	0	0	0	0	0	0
	0.1	0.1	0.1	0	0	0	0	0	0	0	0	0
	0.1	0.1	0.1	0.1	0.1	0.1	0	0	0	0	0	0
	0.1	0.1	0.1	0	0	0	0	0	0	0	0	0
	0.1	0.1	0.1	1.9	1.2	0.1	0.1	0.1	0.1	0	0	0
	0.1	0.1	0.1	0	0	0	0.1	0.1	0.1	0	0	0
	0.1	0.1	0.1	0	0	0	0.1	0.1	0.1	0	0	0
	0.1	0.1	0.1	0	0	0	0	0	0	0	0	0
	0.1	0.1	0.1	0	0	0	0	0	0	0	0	0
	0	0	0	0	0	0	0.1	0.1	0.1	0	0	0
	0.1	0.1	0.1	0	0	0	0.1	0.1	0.1	0	0	0
	0.1	0.1	0.1	0.9	0.6	0	0.2	0.2	0.1	0	0	0
	0.1	0.1	0.1	0	0	0	0	0	0	0	0	0
	0.1	0.1	0.1	0	0	0	0.1	0.1	0.1	0	0	0
	0.1	0.1	0.1	0.1	0.1	0.1	0.1	0.1	0.1	0	0	0
	0.8	0.7	0.1	0.1	0.1	0.1	0.1	0.1	0.1	0	0	0
	0	0	0	0.1	0.1	0.1	0.1	0.1	0.1	0	0	0
	0.1	0.1	0.1	0	0	0	0	0	0	0	0	0
	0.1	0.1	0.1	0	0	0	0	0	0	0	0	0
	0.1	0.1	0.1	0.2	0.2	0.1	0.1	0.1	0.1	0	0	0
	0.1	0.1	0.1	0	0	0	0	0	0	0	0	0
	0.1	0.1	0.1	0.1	0.1	0.1	0	0	0	0.4	0.3	0
	0	0	0	0.4	0.3	0.1	0	0	0	0	0	0
	0.1	0.1	0.1	0.1	0.1	0.1	0	0	0	0.1	0.1	0.1
	0	0	0	0	0	0	0.1	0.1	0.1	0	0	0
	0.1	0.1	0.1	0	0	0	0	0	0	0	0	0
	0.1	0.1	0.1	0	0	0	0.1	0.1	0.1	0	0	0
	0.1	0.1	0.1	0	0	0	0	0	0	0	0	0
	0.1	0.1	0.1	1.1	0.7	0.1	0.1	0.1	0.1	0	0	0
	0.1	0.1	0.1	0.8	0.6	0.1	0	0	0	0	0	0
	0.1	0.1	0.1	0	0	0	0.1	0.1	0.1	0	0	0
	0.1	0.1	0.1	0.1	0.1	0.1	0	0	0	0	0	0
	0.1	0.1	0.1	0.1	0.1	0.1	1	0.6	0.1	0	0	0
	0	0	0	0.1	0.1	0.1	0.1	0.1	0.1	0.1	0.1	0.1
	0.1	0.1	0.1	0.1	0.1	0.1	0	0	0	0	0	0
	0.1	0.1	0.1	0.1	0.1	0.1	0	0	0	0	0	0
	0.1	0.1	0.1	0	0	0	0.1	0.1	0.1	0	0	0
	0.1	0.1	0.1	0.1	0.1	0.1	0.1	0.1	0.1	0	0	0
	0	0	0	0	0	0	0	0	0	0	0	0
	0.1	0.1	0.1	0.1	0.1	0.1	0	0	0	0	0	0
	0	0	0	0	0	0	0.1	0.1	0.1	0	0	0
	0	0	0	0	0	0	0	0	0	0	0	0
	0.1	0.1	0.1	0	0	0	0.1	0.1	0.1	0	0	0
	0.1	0.1	0.1	0	0	0	0	0	0	0	0	0
	0.1	0.1	0.1	0	0	0	0.1	0.1	0.1	0	0	0
	0.1	0.1	0.1	0	0	0	0.1	0.1	0.1	0	0	0
	0.1	0.1	0.1	0	0	0	0.1	0.1	0.1	0	0	0
	0.1	0.1	0.1	0	0	0	0.1	0.1	0.1	0	0	0
	1	0.6	0.1	0.1	0.1	0.1	0	0	0	0	0	0
	0	0	0	0	0	0	0.1	0.1	0.1	0	0	0
	0.1	0.1	0.1	0.1	0.1	0.1	0	0	0	0	0	0
	0.1	0.1	0.1	0	0	0	0.1	0.1	0.1	0	0	0
	0.1	0.1	0.1	0	0	0	0	0	0	0	0	0
	0.1	0.1	0.1	0	0	0	0	0	0	0	0	0
	0.1	0.1	0.1	0	0	0	0	0	0	0	0	0
	0.1	0.1	0.1	0	0	0	0	0	0	0	0	0
	0.1	0.1	0.1	0	0	0	0	0	0	0	0	0
	0.1	0.1	0.1	0	0	0	0	0	0	0	0	0
	0.1	0.1	0.1	0	0	0	0.7	0.5	0	0	0	0
	0.1	0.1	0.1	0	0	0	0	0	0	0	0	0
	0.2	0.2	0.1	0	0	0	0	0	0	0	0	0
	0.1	0.1	0.1	0	0	0	0	0	0	0	0	0
	0.1	0.1	0.1	0.1	0.1	0.1	0	0	0	0.1	0.1	0
	0	0	0	0.1	0.1	0.1	0	0	0	0	0	0
	0.1	0.1	0.1	0.1	0.1	0.1	0.1	0.1	0.1	0	0	0
	0.1	0.1	0.1	0	0	0	0	0	0	0	0	0
	0.1	0.1	0.1	0	0	0	0.2	0.2	0.1	0	0	0
	0.1	0.1	0.1	0.1	0.1	0.1	0	0	0	0	0	0
	0.2	0.2	0.1	0	0	0	0.1	0.1	0.1	0	0	0
	0.1	0.1	0.1	0.1	0.1	0.1	0.1	0.1	0.1	0	0	0
	0.1	0.1	0.1	0	0	0	0	0	0	0	0	0
	0.1	0.1	0.1	0	0	0	0	0	0	0	0	0
	0.1	0.1	0.1	0	0	0	0	0	0	0	0	0
	0.1	0.1	0.1	0	0	0	0.1	0.1	0.1	0	0	0
	0	0	0	0.1	0.1	0.1	0.1	0.1	0.1	0	0	0
	0	0	0	0	0	0	0	0	0	0	0	0
	0	0	0	0	0	0	0	0	0	0	0	0
	0.1	0.1	0.1	0	0	0	0.1	0.1	0.1	0	0	0
	0	0	0	0.1	0.1	0.1	0.1	0.1	0.1	0	0	0
	0.1	0.1	0.1	0.1	0.1	0.1	0.1	0.1	0.1	0	0	0
	0.1	0.1	0.1	0	0	0	0	0	0	0	0	0
	0.1	0.1	0.1	0.1	0.1	0.1	0	0	0	0	0	0
	0.1	0.1	0.1	0.1	0.1	0.1	0	0	0	0	0	0
	0.1	0.1	0.1	0.1	0.1	0.1	0	0	0	0	0	0
	0.1	0.1	0.1	0.1	0.1	0.1	0	0	0	0	0	0
	0.1	0.1	0.1	0.1	0.1	0.1	0	0	0	0	0	0
	0.1	0.1	0.1	0	0	0	0	0	0	0	0	0
	0.1	0.1	0.1	0.1	0.1	0.1	0.1	0.1	0.1	0	0	0
	0.1	0.1	0.1	0.1	0.1	0.1	0	0	0	0	0	0
	0.1	0.1	0.1	0	0	0	0.1	0.1	0.1	0	0	0
	0.1	0.1	0.1	0	0	0	0.1	0.1	0.1	0	0	0
	0.1	0.1	0.1	0.1	0.1	0.1	0	0	0	0	0	0
	0.1	0.1	0.1	0	0	0	0	0	0	0	0	0
	0	0	0	0	0	0	0	0	0	0	0	0
	0	0	0	0.1	0.1	0.1	0	0	0	0	0	0
	0.1	0.1	0.1	0	0	0	0.1	0.1	0.1	0	0	0
	0.2	0.2	0.1	0.1	0.1	0.1	0	0	0	0	0	0
	0.1	0.1	0.1	0.1	0.1	0.1	0	0	0	0	0	0
	0.1	0.1	0.1	0.1	0.1	0.1	0.1	0.1	0.1	0	0	0
	0.1	0.1	0.1	0.2	0.2	0.1	0	0	0	0	0	0
	0.1	0.1	0.1	0.1	0.1	0.1	0.2	0.2	0.1	0	0	0
	0	0	0	0.1	0.1	0.1	0	0	0	0	0	0
	0	0	0	0	0	0	0.1	0.1	0.1	0	0	0
	0	0	0	0	0	0	0	0	0	0	0	0
	0.1	0.1	0.1	0.1	0.1	0.1	0.1	0.1	0.1	0	0	0
	0.1	0.1	0.1	1	0.7	0.1	0.1	0.1	0.1	0	0	0
	0.1	0.1	0.1	0	0	0	0.1	0.1	0.1	0	0	0
	0.1	0.1	0.1	0	0	0	0	0	0	0	0	0
	0.1	0.1	0.1	0	0	0	0.1	0.1	0.1	0	0	0
	0.1	0.1	0.1	0.1	0.1	0.1	0	0	0	0	0	0
	0.1	0.1	0.1	0	0	0	0.1	0.1	0.1	0	0	0
	0.1	0.1	0.1	0.1	0.1	0.1	0.1	0.1	0.1	0	0	0
	0.1	0.1	0.1	0	0	0	0	0	0	0	0	0
	0.1	0.1	0.1	0.1	0.1	0.1	0	0	0	0	0	0
	0.1	0.1	0.1	0	0	0	0.1	0.1	0.1	0	0	0
	0.1	0.1	0.1	0	0	0	0.1	0.1	0.1	0	0	0
	0.1	0.1	0.1	0	0	0	0.1	0.1	0.1	0	0	0
	0.1	0.1	0.1	0.1	0.1	0.1	0	0	0	0	0	0
	0.1	0.1	0.1	0	0	0	0	0	0	0	0	0
	0.1	0.1	0.1	0	0	0	0.1	0.1	0.1	0	0	0
	0.1	0.1	0.1	0.1	0.1	0.1	0	0	0	0	0	0
	0.1	0.1	0.1	0.1	0.1	0.1	0	0	0	0	0	0
	0.1	0.1	0.1	0.1	0.1	0.1	0	0	0	0	0	0
	0.1	0.1	0.1	0.1	0.1	0.1	0	0	0	0	0	0
	0.1	0.1	0.1	0.1	0.1	0.1	0.4	0.4	0.1	0	0	0
	0.1	0.1	0.1	0	0	0	0	0	0	0	0	0
	0.1	0.1	0.1	0.1	0.1	0.1	0	0	0	0	0	0
	0.1	0.1	0.1	0.1	0.1	0.1	0.1	0.1	0.1	0	0	0
	0.1	0.1	0.1	0.1	0.1	0.1	0	0	0	0	0	0
	0.1	0.1	0.1	0	0	0	0	0	0	0	0	0
	0.1	0.1	0.1	0.1	0.1	0.1	0.1	0.1	0.1	0	0	0
	0.2	0.2	0.2	0	0	0	0.1	0.1	0.1	0	0	0
	0.1	0.1	0.1	0	0	0	0.1	0.1	0.1	0	0	0
	0.1	0.1	0.1	0.1	0.1	0.1	0.1	0.1	0.1	0	0	0
	0.1	0.1	0.1	0	0	0	0	0	0	0	0	0
	0.1	0.1	0.1	0	0	0	0	0	0	0	0	0
	0.1	0.1	0.1	0.1	0.1	0.1	0	0	0	0	0	0
	0.1	0.1	0.1	0	0	0	0.1	0.1	0.1	0	0	0
	0.1	0.1	0.1	0.1	0.1	0.1	0	0	0	0	0	0
	0.1	0.1	0.1	0.1	0.1	0.1	0.2	0.2	0.2	0	0	0
	0.1	0.1	0.1	0.1	0.1	0.1	0	0	0	0	0	0
	0.1	0.1	0.1	0	0	0	0.1	0.1	0.1	0	0	0
	0.1	0.1	0.1	0	0	0	0.1	0.1	0.1	0	0	0
	0.1	0.1	0.1	0	0	0	0.1	0.1	0.1	0	0	0
	0.1	0.1	0.1	0	0	0	0.1	0.1	0.1	0	0	0
	0.1	0.1	0.1	0.9	0.6	0	0.1	0.1	0.1	0	0	0
	0.1	0.1	0.1	0	0	0	0	0	0	0	0	0
	0.1	0.1	0.1	0	0	0	0	0	0	0.1	0.1	0.1
	0.1	0.1	0.1	0.1	0.1	0.1	0.1	0.1	0.1	0	0	0
	0.1	0.1	0.1	0	0	0	0	0	0	0	0	0
	0.1	0.1	0.1	0.1	0.1	0.1	0.1	0.1	0.1	0	0	0
	0.1	0.1	0.1	0	0	0	0.1	0.1	0.1	0	0	0
	0.1	0.1	0.1	0	0	0	0	0	0	0	0	0
	0	0	0	0.4	0.3	0.1	0.1	0.1	0.1	0	0	0
	0.1	0.1	0.1	0	0	0	0	0	0	0	0	0
	0.1	0.1	0.1	0	0	0	0	0	0	0	0	0
	0.1	0.1	0.1	0	0	0	0	0	0	0	0	0
	0.1	0.1	0.1	0	0	0	0	0	0	0	0	0
	0	0	0	0.1	0.1	0.1	0	0	0	0	0	0
	0.1	0.1	0.1	0.1	0.1	0.1	0.1	0.1	0.1	0	0	0
	0.1	0.1	0.1	0.1	0.1	0.1	0	0	0	0	0	0
	0.1	0.1	0.1	0.1	0.1	0.1	0.1	0.1	0.1	0	0	0
	0.1	0.1	0.1	0.1	0.1	0.1	0.1	0.1	0.1	0	0	0
	0.1	0.1	0.1	0	0	0	0	0	0	0.1	0.1	0.1
	0.1	0.1	0.1	0.1	0.1	0.1	0	0	0	0	0	0
	0.1	0.1	0.1	0.4	0.4	0.1	0	0	0	0	0	0
	0.1	0.1	0.1	0	0	0	0	0	0	0	0	0
	0.1	0.1	0.1	0.1	0.1	0.1	0.1	0.1	0.1	0	0	0
	0.1	0.1	0.1	0.1	0.1	0.1	0.1	0.1	0.1	0	0	0
	0.1	0.1	0.1	0	0	0	0.1	0.1	0.1	0	0	0
	0.1	0.1	0.1	0.1	0.1	0.1	0.1	0.1	0.1	0	0	0
	0.1	0.1	0.1	0	0	0	0	0	0	0	0	0
	0.1	0.1	0.1	0	0	0	0	0	0	0	0	0
	0	0	0	0.1	0.1	0.1	0	0	0	0	0	0
	0.1	0.1	0.1	0.1	0.1	0.1	0	0	0	0	0	0
	0.1	0.1	0.1	0.1	0.1	0.1	0.1	0.1	0.1	0	0	0
	1	0.7	0.1	0	0	0	0	0	0	0	0	0
	0.1	0.1	0.1	0	0	0	0	0	0	0	0	0
	0.1	0.1	0.1	0	0	0	0	0	0	0	0	0
	0.1	0.1	0.1	0	0	0	0.1	0.1	0.1	0	0	0
	0.1	0.1	0.1	0	0	0	0	0	0	0	0	0
	0.1	0.1	0.1	0.1	0.1	0.1	0	0	0	0	0	0
	0.1	0.1	0.1	0	0	0	0	0	0	0	0	0
	0.1	0.1	0.1	0.1	0.1	0.1	0	0	0	0	0	0
	0.1	0.1	0.1	0.1	0.1	0.1	0.1	0.1	0	0	0	0
	0.1	0.1	0.1	0.1	0.1	0.1	0.1	0.1	0.1	0	0	0
	0.1	0.1	0.1	0.1	0.1	0.1	0.1	0.1	0.1	0	0	0
	0.1	0.1	0.1	0	0	0	0.1	0.1	0.1	0	0	0
	0.1	0.1	0.1	0	0	0	0.1	0.1	0.1	0	0	0
	0.1	0.1	0.1	0	0	0	0	0	0	0	0	0
	0.1	0.1	0.1	0.2	0.2	0.1	0.1	0.1	0.1	0	0	0
	0.1	0.1	0.1	0.1	0.1	0.1	0.1	0.1	0.1	0	0	0
	0.1	0.1	0.1	0	0	0	0	0	0	0	0	0
	0.1	0.1	0.1	0	0	0	0.1	0.1	0.1	0	0	0
	0.1	0.1	0.1	0	0	0	0	0	0	0	0	0
	0.1	0.1	0.1	0	0	0	0	0	0	0	0	0
	0.1	0.1	0.1	0	0	0	0.1	0.1	0.1	0	0	0
	0.1	0.1	0.1	0	0	0	0	0	0	0	0	0
	0.1	0.1	0.1	0.1	0.1	0.1	0	0	0	0	0	0
	0.1	0.1	0.1	0	0	0	0	0	0	0	0	0
	0.1	0.1	0.1	0	0	0	0	0	0	0	0	0
	0.1	0.1	0.1	0	0	0	0	0	0	0	0	0
	0.1	0.1	0.1	0.1	0.1	0.1	0	0	0	0	0	0
	0.1	0.1	0.1	0.1	0.1	0.1	0.1	0.1	0.1	0	0	0
	0.1	0.1	0.1	0	0	0	0	0	0	0	0	0
	0.1	0.1	0.1	0.1	0.1	0.1	0.1	0.1	0.1	0.1	0.1	0.1
	0.1	0.1	0.1	0.1	0.1	0.1	0	0	0	0	0	0
	0.1	0.1	0.1	0.1	0.1	0.1	0	0	0	0	0	0
	0.1	0.1	0.1	0	0	0	0.1	0.1	0.1	0	0	0
	0.1	0.1	0.1	0	0	0	0	0	0	0	0	0
	0.1	0.1	0.1	0.1	0.1	0.1	0.1	0.1	0.1	0	0	0
	0.1	0.1	0.1	1	0.6	0.1	0	0	0	0	0	0
	0.1	0.1	0.1	0	0	0	0	0	0	0	0	0
	0.1	0.1	0.1	0.1	0.1	0.1	0	0	0	0	0	0
	0	0	0	0.1	0.1	0.1	0	0	0	0	0	0
	0.1	0.1	0.1	0.1	0.1	0.1	0.1	0.1	0.1	0	0	0
	0.1	0.1	0.1	0.1	0.1	0.1	0	0	0	0	0	0
	0.1	0.1	0.1	0	0	0	0	0	0	0	0	0
	0.1	0.1	0.1	0.1	0.1	0.1	0.1	0.1	0.1	0	0	0
	0.1	0.1	0.1	0.1	0.1	0.1	0	0	0	0	0	0
	0.1	0.1	0.1	0.1	0.1	0.1	0	0	0	0	0	0
	0.1	0.1	0.1	0	0	0	0.1	0.1	0.1	0	0	0
	0.1	0.1	0.1	0	0	0	0	0	0	0	0	0
	0.1	0.1	0.1	0.1	0.1	0.1	0.1	0.1	0.1	0	0	0
	0.1	0.1	0.1	0	0	0	0	0	0	0	0	0
	0.1	0.1	0.1	0	0	0	0	0	0	0	0	0
	0.1	0.1	0.1	0	0	0	0	0	0	0	0	0
	0.1	0.1	0.1	0	0	0	0.1	0.1	0.1	0	0	0
	0.1	0.1	0.1	0	0	0	0.1	0.1	0.1	0	0	0
	0.1	0.1	0.1	0.9	0.6	0	0.1	0.1	0.1	0	0	0
	0.1	0.1	0.1	0	0	0	0	0	0	0	0	0
	0	0	0	0.1	0.1	0.1	0.1	0.1	0.1	0	0	0
	0.1	0.1	0.1	0.2	0.2	0.1	0.1	0.1	0.1	0	0	0
	0.1	0.1	0.1	0	0	0	0.1	0.1	0.1	0	0	0
	0.1	0.1	0.1	0	0	0	0.1	0.1	0.1	0	0	0
	0.1	0.1	0.1	0.1	0.1	0.1	0	0	0	0	0	0
	0.1	0.1	0.1	0	0	0	0	0	0	0	0	0
	0.1	0.1	0.1	0	0	0	0	0	0	0	0	0
	0.1	0.1	0.1	0.1	0.1	0.1	0	0	0	0	0	0
	0.1	0.1	0.1	0.1	0.1	0.1	0.1	0.1	0.1	0	0	0
	0.2	0.2	0.2	0	0	0	0	0	0	0	0	0
	0.1	0.1	0.1	0	0	0	0	0	0	0	0	0
	0.1	0.1	0.1	0.1	0.1	0.1	0	0	0	0	0	0
	0.1	0.1	0.1	0.1	0.1	0.1	0.1	0.1	0.1	0	0	0
	0.1	0.1	0.1	0	0	0	0	0	0	0	0	0
	0.1	0.1	0.1	0.1	0.1	0.1	0	0	0	0	0	0
	0.1	0.1	0.1	0.1	0.1	0.1	0	0	0	0	0	0
	0.1	0.1	0.1	0.1	0.1	0.1	0	0	0	0	0	0
	0.1	0.1	0.1	0.1	0.1	0.1	0	0	0	0	0	0
	0.1	0.1	0.1	0.1	0.1	0.1	0	0	0	0	0	0
	0.2	0.2	0.2	0	0	0	0	0	0	0.1	0.1	0.1
	0.1	0.1	0.1	0	0	0	0	0	0	0	0	0
	0.1	0.1	0.1	0.1	0.1	0.1	0	0	0	0	0	0
	0.1	0.1	0.1	0.1	0.1	0.1	0.1	0.1	0.1	0	0	0
	0.1	0.1	0.1	0	0	0	0.1	0.1	0.1	0	0	0
	0.1	0.1	0.1	0.1	0.1	0.1	0	0	0	0	0	0
	0.1	0.1	0.1	0.1	0.1	0.1	0.1	0.1	0.1	0	0	0
	0.1	0.1	0.1	0	0	0	0.1	0.1	0.1	0	0	0
	0.1	0.1	0.1	0	0	0	0	0	0	0	0	0
	0.1	0.1	0.1	0.1	0.1	0.1	0.1	0.1	0.1	0	0	0
	0.1	0.1	0.1	0	0	0	0	0	0	0	0	0
	0.1	0.1	0.1	0.1	0.1	0.1	0	0	0	0	0	0
	0.1	0.1	0.1	0.3	0.3	0.1	0	0	0	0	0	0
	0.1	0.1	0.1	0	0	0	0	0	0	0	0	0
	0.1	0.1	0.1	0.1	0.1	0.1	0	0	0	0	0	0
	0.1	0.1	0.1	0.1	0.1	0.1	0	0	0	0	0	0
	0	0	0	0.1	0.1	0.1	0.1	0.1	0.1	0	0	0
	0.1	0.1	0.1	0	0	0	0.1	0.1	0.1	0	0	0
	0.1	0.1	0.1	0.1	0.1	0.1	0.1	0.1	0.1	0	0	0
	0.1	0.1	0.1	0	0	0	0.1	0.1	0.1	0	0	0
	0.1	0.1	0.1	0.1	0.1	0.1	0	0	0	0	0	0
	0.2	0.2	0.2	0	0	0	0	0	0	0	0	0
	0.1	0.1	0.1	0	0	0	0.1	0.1	0.1	0	0	0
	0.1	0.1	0.1	0	0	0	0.1	0.1	0.1	0	0	0
	0.1	0.1	0.1	0	0	0	0	0	0	0	0	0
	0.1	0.1	0.1	0.1	0.1	0.1	0.1	0.1	0.1	0	0	0
	0.1	0.1	0.1	0	0	0	0	0	0	0	0	0
	0.1	0.1	0.1	0.1	0.1	0.1	0	0	0	0	0	0
	0.1	0.1	0.1	0.1	0.1	0.1	0.1	0.1	0.1	0	0	0
	0.1	0.1	0.1	0.1	0.1	0.1	0	0	0	0	0	0
	0.1	0.1	0.1	0.1	0.1	0.1	0.1	0.1	0.1	0	0	0
	0.1	0.1	0.1	0	0	0	0	0	0	0	0	0
	0.1	0.1	0.1	0.1	0.1	0.1	0.1	0.1	0.1	0	0	0
	0.1	0.1	0.1	0.1	0.1	0.1	0	0	0	0	0	0
	0.1	0.1	0.1	0	0	0	0.1	0.1	0.1	0	0	0
	0.1	0.1	0.1	0	0	0	0	0	0	0	0	0
	0.1	0.1	0.1	0	0	0	0.1	0.1	0.1	0	0	0
	0.1	0.1	0.1	0.1	0.1	0.1	0	0	0	0	0	0
	0.1	0.1	0.1	0.1	0.1	0.1	0.1	0.1	0.1	0	0	0
	0.1	0.1	0.1	0.1	0.1	0.1	0	0	0	0	0	0
	0.1	0.1	0.1	0	0	0	0	0	0	0	0	0
	0.1	0.1	0.1	0.1	0.1	0.1	0.1	0.1	0.1	0	0	0
	0.1	0.1	0.1	0.1	0.1	0.1	0	0	0	0	0	0
	0.1	0.1	0.1	0	0	0	0	0	0	0	0	0
	0.1	0.1	0.1	0.1	0.1	0.1	0	0	0	0	0	0
	0.1	0.1	0.1	0.1	0.1	0.1	0.1	0.1	0.1	0.1	0.1	0.1
	0	0	0	0	0	0	0	0	0	0	0	0
	0.1	0.1	0.1	0	0	0	0	0	0	0	0	0
	0.5	0.4	0.1	0.2	0.1	0.1	0	0	0	0	0	0
	0	0	0	0.1	0.1	0.1	0	0	0	0	0	0
	0.1	0.1	0.1	0.1	0.1	0.1	0	0	0	0	0	0
	0.1	0.1	0.1	0	0	0	0	0	0	0	0	0
	0.1	0.1	0.1	0.1	0.1	0.1	0	0	0	0	0	0
	0.1	0.1	0.1	1	0.6	0.1	0.1	0.1	0.1	0	0	0
	0.1	0.1	0.1	0.1	0.1	0.1	0	0	0	0	0	0
	0.1	0.1	0.1	0	0	0	0	0	0	0	0	0
	0.1	0.1	0.1	0.1	0.1	0.1	0.1	0.1	0.1	0	0	0
	0.1	0.1	0.1	0.1	0.1	0.1	0	0	0	0	0	0
	0.1	0.1	0.1	0	0	0	0	0	0	0	0	0
	0.1	0.1	0.1	0.1	0.1	0.1	0.1	0.1	0.1	0	0	0
	0.1	0.1	0.1	0.1	0.1	0.1	0.1	0.1	0.1	0	0	0
	0.1	0.1	0.1	0	0	0	0.1	0.1	0.1	0	0	0
	0.1	0.1	0.1	0	0	0	0.4	0.3	0.1	0	0	0
	0.1	0.1	0.1	0.1	0.1	0.1	0	0	0	0	0	0
	0.1	0.1	0.1	0.1	0.1	0.1	0.1	0.1	0.1	0	0	0
	0.1	0.1	0.1	0.1	0.1	0.1	0.1	0.1	0.1	0	0	0
	0	0	0	0	0	0	0.1	0.1	0.1	0	0	0
	0.1	0.1	0.1	0	0	0	0	0	0	0	0	0
	0.1	0.1	0.1	0	0	0	0.1	0.1	0.1	0	0	0
	0.1	0.1	0.1	0.1	0.1	0.1	0.1	0.1	0.1	0	0	0
	0	0	0	0	0	0	0.1	0.1	0.1	0	0	0
	0.1	0.1	0.1	0.1	0.1	0.1	0	0	0	0	0	0
	0.1	0.1	0.1	0	0	0	0.1	0.1	0.1	0	0	0
	0.1	0.1	0.1	0.1	0.1	0.1	0	0	0	0.1	0.1	0.1
	0.1	0.1	0.1	0.1	0.1	0.1	0	0	0	0	0	0
	0.1	0.1	0.1	0.1	0.1	0.1	0	0	0	0	0	0
	0.1	0.1	0.1	0.1	0.1	0.1	0.1	0.1	0.1	0	0	0
	0.1	0.1	0.1	0	0	0	0.1	0.1	0.1	0	0	0
	0.1	0.1	0.1	0	0	0	0	0	0	0	0	0
	0.1	0.1	0.1	0.1	0.1	0.1	0.1	0.1	0.1	0	0	0
	0.1	0.1	0.1	0	0	0	0.1	0.1	0.1	0	0	0
	0.1	0.1	0.1	0	0	0	0	0	0	0	0	0
	0.1	0.1	0.1	0	0	0	0.1	0.1	0.1	0	0	0
	0.1	0.1	0.1	0	0	0	0	0	0	0.1	0.1	0.1
	0.1	0.1	0.1	0	0	0	0	0	0	0	0	0
	0.1	0.1	0.1	0.1	0.1	0.1	0	0	0	0	0	0
	0.1	0.1	0.1	0	0	0	0.1	0.1	0.1	0.1	0.1	0.1
	0.1	0.1	0.1	0.1	0.1	0.1	0	0	0	0	0	0
	0.1	0.1	0.1	0.1	0.1	0.1	0.1	0.1	0.1	0	0	0
	0.1	0.1	0.1	0	0	0	0	0	0	0	0	0
	0.1	0.1	0.1	0	0	0	0	0	0	0	0	0
	0.1	0.1	0.1	0.1	0.1	0.1	0.1	0.1	0.1	0	0	0
	0.1	0.1	0.1	0.1	0.1	0.1	0.1	0.1	0.1	0	0	0
	0.1	0.1	0.1	0	0	0	0	0	0	0	0	0
	0.1	0.1	0.1	0	0	0	0.1	0.1	0.1	0	0	0
	0.1	0.1	0.1	0.1	0.1	0.1	0	0	0	0	0	0
	0.1	0.1	0.1	0.1	0.1	0.1	0.1	0.1	0.1	0	0	0
	0.1	0.1	0.1	0	0	0	0	0	0	0	0	0
	0.1	0.1	0.1	0.1	0.1	0.1	0	0	0	0	0	0
	0.1	0.1	0.1	0	0	0	0.1	0.1	0.1	0	0	0
	0.1	0.1	0.1	0.2	0.2	0.1	0	0	0	0	0	0
	0.1	0.1	0.1	0.1	0.1	0.1	0	0	0	0	0	0
	0.1	0.1	0.1	0	0	0	0	0	0	0	0	0
	0.1	0.1	0.1	0	0	0	0	0	0	0	0	0
	0.1	0.1	0.1	0.1	0.1	0.1	0	0	0	0	0	0
	0.1	0.1	0.1	0	0	0	0.1	0.1	0.1	0	0	0
	0.1	0.1	0.1	0	0	0	0	0	0	0	0	0
	0.1	0.1	0.1	0	0	0	0.1	0.1	0.1	0	0	0
	0.1	0.1	0.1	0	0	0	0	0	0	0	0	0
	0.1	0.1	0.1	0.1	0.1	0.1	0	0	0	0	0	0
	0.1	0.1	0.1	0.1	0.1	0.1	0.1	0.1	0.1	0	0	0
	0.1	0.1	0.1	0	0	0	0	0	0	0	0	0
	0.1	0.1	0.1	0.1	0.1	0.1	0	0	0	0	0	0
	0.1	0.1	0.1	0.1	0.1	0.1	0.1	0.1	0.1	0	0	0
	0.1	0.1	0.1	0.1	0.1	0.1	0	0	0	0	0	0
	0.1	0.1	0.1	0.1	0.1	0.1	0.1	0.1	0.1	0	0	0
	0.1	0.1	0.1	0	0	0	0.1	0.1	0.1	0	0	0
	0.1	0.1	0.1	0.1	0.1	0.1	0.1	0.1	0.1	0	0	0
	0.1	0.1	0.1	0	0	0	0	0	0	0	0	0
	0.1	0.1	0.1	0.1	0.1	0.1	0.1	0.1	0.1	0	0	0
	0.1	0.1	0.1	0.4	0.4	0.1	0	0	0	0	0	0
	0.1	0.1	0.1	0.1	0.1	0.1	0.1	0.1	0.1	0	0	0
	0.1	0.1	0.1	0	0	0	0	0	0	0	0	0
	0.1	0.1	0.1	0.2	0.2	0.1	0	0	0	0	0	0
	0.1	0.1	0.1	0	0	0	0	0	0	0	0	0
	0.1	0.1	0.1	0.1	0.1	0.1	0.1	0.1	0.1	0	0	0
	0.1	0.1	0.1	0	0	0	0.1	0.1	0.1	0	0	0
	0.1	0.1	0.1	0	0	0	0	0	0	0	0	0
	0.1	0.1	0.1	0.1	0.1	0.1	0	0	0	0	0	0
	0.1	0.1	0.1	0.1	0.1	0.1	0	0	0	0	0	0
	0.1	0.1	0.1	0.1	0.1	0.1	0.1	0.1	0.1	0	0	0
	0.1	0.1	0.1	0	0	0	0.1	0.1	0.1	0	0	0
	0.1	0.1	0.1	0.1	0.1	0.1	0	0	0	0	0	0
	0.1	0.1	0.1	0.1	0.1	0.1	0	0	0	0	0	0
	0.1	0.1	0.1	0	0	0	0	0	0	0	0	0
	0.1	0.1	0.1	0.2	0.2	0.1	0	0	0	0	0	0
	0.1	0.1	0.1	0.1	0.1	0.1	0	0	0	0	0	0
	0.1	0.1	0.1	0	0	0	0	0	0	0	0	0
	0.1	0.1	0.1	0.1	0.1	0.1	0	0	0	0	0	0
	0.1	0.1	0.1	0.1	0.1	0.1	0.1	0.1	0.1	0	0	0
	0.1	0.1	0.1	0.1	0.1	0.1	0.1	0.1	0.1	0	0	0
	0.1	0.1	0.1	0	0	0	0	0	0	0	0	0
	0.1	0.1	0.1	0	0	0	0	0	0	0	0	0
	0.1	0.1	0.1	0.1	0.1	0.1	0	0	0	0	0	0
	0.1	0.1	0.1	0	0	0	0	0	0	0	0	0
	0.1	0.1	0.1	0.1	0.1	0.1	0	0	0	0	0	0
	0.1	0.1	0.1	0.1	0.1	0.1	0	0	0	0	0	0
	0.1	0.1	0.1	0.1	0.1	0.1	0	0	0	0	0	0
	0.1	0.1	0.1	0	0	0	0	0	0	0	0	0
	0.1	0.1	0.1	0.1	0.1	0.1	0	0	0	0.1	0.1	0.1
	0.1	0.1	0.1	0	0	0	0.1	0.1	0.1	0	0	0
	0.1	0.1	0.1	0.1	0.1	0.1	0.1	0.1	0.1	0	0	0
	0.2	0.2	0.2	0	0	0	0	0	0	0	0	0
	0.1	0.1	0.1	0	0	0	0.1	0.1	0.1	0	0	0
	0.1	0.1	0.1	0	0	0	0.1	0.1	0.1	0.1	0.1	0.1
	0.1	0.1	0.1	0.1	0.1	0.1	0	0	0	0	0	0
	0.1	0.1	0.1	0.1	0.1	0.1	0	0	0	0	0	0
	0.1	0.1	0.1	0.1	0.1	0.1	0	0	0	0	0	0
	0.1	0.1	0.1	0	0	0	0.1	0.1	0.1	0	0	0
	0.1	0.1	0.1	0	0	0	0.1	0.1	0.1	0	0	0
	0.1	0.1	0.1	0.1	0.1	0.1	0	0	0	0	0	0
	0.2	0.2	0.2	0.1	0.1	0.1	0	0	0	0	0	0
	0.1	0.1	0.1	0.1	0.1	0.1	0	0	0	0	0	0
	0.1	0.1	0.1	0	0	0	0	0	0	0	0	0
	0.1	0.1	0.1	0	0	0	0.1	0.1	0.1	0	0	0
	0.1	0.1	0.1	0.7	0.6	0	0.1	0.1	0.1	0	0	0
	0.1	0.1	0.1	0.1	0.1	0.1	0.1	0.1	0.1	0	0	0
	0.1	0.1	0.1	0.1	0.1	0.1	0.1	0.1	0.1	0	0	0
	0.1	0.1	0.1	0	0	0	0	0	0	0	0	0
	0.1	0.1	0.1	0.1	0.1	0.1	0	0	0	0.1	0.1	0.1
	0.1	0.1	0.1	0.1	0.1	0.1	0	0	0	0	0	0
	0.1	0.1	0.1	0	0	0	0	0	0	0	0	0
	0.2	0.2	0.2	0.1	0.1	0.1	0	0	0	0	0	0
	0.1	0.1	0.1	0.1	0.1	0.1	0	0	0	0	0	0
	0.1	0.1	0.1	1	0.6	0.1	0.1	0.1	0.1	0	0	0
	0.1	0.1	0.1	0.1	0.1	0.1	0.1	0.1	0.1	0	0	0
	0.1	0.1	0.1	0	0	0	0	0	0	0	0	0
	0.1	0.1	0.1	0	0	0	0.1	0.1	0.1	0	0	0
	0.1	0.1	0.1	0.1	0.1	0.1	0	0	0	0	0	0
	0.1	0.1	0.1	0.1	0.1	0.1	0	0	0	0	0	0
	0.1	0.1	0.1	0.1	0.1	0.1	0	0	0	0	0	0
	0.1	0.1	0.1	0.1	0.1	0.1	0.1	0.1	0.1	0	0	0
	0.1	0.1	0.1	0.1	0.1	0.1	0	0	0	0	0	0
	0.1	0.1	0.1	0.1	0.1	0.1	0	0	0	0	0	0
	0.1	0.1	0.1	0.1	0.1	0.1	0	0	0	0	0	0
	0.1	0.1	0.1	0	0	0	0	0	0	0	0	0
	0.1	0.1	0.1	0	0	0	0.1	0.1	0.1	0	0	0
	0.1	0.1	0.1	0.1	0.1	0.1	0	0	0	0	0	0
	0.1	0.1	0.1	0.1	0.1	0.1	0	0	0	0	0	0
	0.1	0.1	0.1	0.1	0.1	0.1	0	0	0	0	0	0
	0.1	0.1	0.1	0	0	0	0	0	0	0	0	0
	0.1	0.1	0.1	0.1	0.1	0.1	0	0	0	0	0	0
	0.1	0.1	0.1	0.8	0.6	0.1	0	0	0	0	0	0
	0.1	0.1	0.1	0.1	0.1	0.1	0	0	0	0	0	0
	0.1	0.1	0.1	0	0	0	0	0	0	0	0	0
	0.1	0.1	0.1	0.1	0.1	0.1	0	0	0	0	0	0
	0.1	0.1	0.1	0.1	0.1	0.1	0.1	0.1	0.1	0	0	0
	0.1	0.1	0.1	0	0	0	0.1	0.1	0.1	0	0	0
	0.1	0.1	0.1	0.1	0.1	0.1	0	0	0	0	0	0
	0.1	0.1	0.1	0.1	0.1	0.1	0	0	0	0	0	0
	0.1	0.1	0.1	0.1	0.1	0.1	0.1	0.1	0.1	0	0	0
	0.1	0.1	0.1	0	0	0	0.8	0.6	0.1	0	0	0
	0.2	0.2	0.2	0.1	0.1	0.1	0.1	0.1	0.1	0	0	0
	0.1	0.1	0.1	0.1	0.1	0.1	0.1	0.1	0.1	0	0	0
	0.1	0.1	0.1	0	0	0	0.1	0.1	0.1	0	0	0
	0.1	0.1	0.1	0.1	0.1	0.1	0.1	0.1	0.1	0	0	0
	0.1	0.1	0.1	0.1	0.1	0.1	0.1	0.1	0.1	0	0	0
	0.1	0.1	0.1	0.1	0.1	0.1	0	0	0	0	0	0
	0.1	0.1	0.1	0.1	0.1	0.1	0	0	0	0	0	0
	0.2	0.2	0.2	0.1	0.1	0.1	0.1	0.1	0.1	0	0	0
	0.2	0.2	0.2	0.1	0.1	0.1	0.1	0.1	0.1	0	0	0
	0.1	0.1	0.1	0.1	0.1	0.1	0	0	0	0	0	0
	0.1	0.1	0.1	0.1	0.1	0.1	0.1	0.1	0.1	0	0	0
	0.1	0.1	0.1	0	0	0	0	0	0	0	0	0
	0.1	0.1	0.1	0.1	0.1	0.1	0	0	0	0	0	0
	0.2	0.2	0.2	0.1	0.1	0.1	0.1	0.1	0.1	0	0	0
	0.1	0.1	0.1	0	0	0	0	0	0	0	0	0
	0.1	0.1	0.1	0.1	0.1	0.1	0	0	0	0	0	0
	0.1	0.1	0.1	0	0	0	0.1	0.1	0.1	0	0	0
	0.1	0.1	0.1	0	0	0	0.1	0.1	0.1	0	0	0
	0.1	0.1	0.1	0.1	0.1	0.1	0	0	0	0	0	0
	0.8	0.7	0.1	0.1	0.1	0.1	0	0	0	0	0	0
	0.1	0.1	0.1	0	0	0	0	0	0	0	0	0
	0.1	0.1	0.1	0.1	0.1	0.1	0	0	0	0	0	0
	0.2	0.2	0.2	0	0	0	0	0	0	0	0	0
	0.1	0.1	0.1	0.1	0.1	0.1	0.1	0.1	0.1	0	0	0
	0.1	0.1	0.1	0.1	0.1	0.1	0	0	0	0	0	0
	0.1	0.1	0.1	0.1	0.1	0.1	0	0	0	0	0	0
	0.1	0.1	0.1	0	0	0	0.2	0.2	0.1	0	0	0
	0.1	0.1	0.1	0.1	0.1	0.1	0	0	0	0	0	0
	0.1	0.1	0.1	0	0	0	0.1	0.1	0.1	0	0	0
	0.1	0.1	0.1	0	0	0	0	0	0	0	0	0
	0.1	0.1	0.1	0.1	0.1	0.1	0.1	0.1	0.1	0	0	0
	0.1	0.1	0.1	0.1	0.1	0.1	0.1	0.1	0.1	0	0	0
	0.1	0.1	0.1	0.1	0.1	0.1	0	0	0	0	0	0
	0.1	0.1	0.1	0	0	0	0.1	0.1	0.1	0	0	0
	0.1	0.1	0.1	0.1	0.1	0.1	0.1	0.1	0.1	0	0	0
	0.2	0.2	0.2	0	0	0	0	0	0	0	0	0
	0.1	0.1	0.1	0.1	0.1	0.1	0.1	0.1	0.1	0	0	0
	0.2	0.2	0.2	0.1	0.1	0.1	0.1	0.1	0.1	0	0	0
	0.2	0.2	0.2	1	0.6	0.1	0	0	0	0	0	0
	0.1	0.1	0.1	0.1	0.1	0.1	0.1	0.1	0.1	0	0	0
	0.1	0.1	0.1	0.1	0.1	0.1	0.1	0.1	0.1	0	0	0
	0.1	0.1	0.1	0.1	0.1	0.1	0.1	0.1	0.1	0	0	0
	0.1	0.1	0.1	0	0	0	0.1	0.1	0.1	0	0	0
	0.1	0.1	0.1	0.1	0.1	0.1	0	0	0	0	0	0
	0.1	0.1	0.1	0	0	0	0	0	0	0	0	0
	0.1	0.1	0.1	0.1	0.1	0.1	0.1	0.1	0.1	0	0	0
	0.1	0.1	0.1	0	0	0	0.1	0.1	0.1	0	0	0
	0.1	0.1	0.1	0	0	0	0.1	0.1	0.1	0	0	0
	0.2	0.2	0.2	0.7	0.6	0.1	0.1	0.1	0.1	0	0	0
	0.1	0.1	0.1	0.1	0.1	0.1	0.1	0.1	0.1	0	0	0
	0.1	0.1	0.1	0.1	0.1	0.1	0.1	0.1	0.1	0.1	0.1	0.1
	0.1	0.1	0.1	0	0	0	0	0	0	0	0	0
	0.1	0.1	0.1	0	0	0	0.1	0.1	0.1	0	0	0
	0.1	0.1	0.1	0.1	0.1	0.1	0.2	0.2	0.1	0	0	0
	0.2	0.2	0.2	0.1	0.1	0.1	0.1	0.1	0.1	0	0	0
	0.1	0.1	0.1	0.4	0.4	0.1	0	0	0	0	0	0
	0.1	0.1	0.1	0.1	0.1	0.1	0	0	0	0	0	0
	0.1	0.1	0.1	2	1.2	0.1	0.1	0.1	0.1	0	0	0
	0.1	0.1	0.1	0	0	0	0.1	0.1	0.1	0	0	0
	0.1	0.1	0.1	0.1	0.1	0.1	0.1	0.1	0.1	0	0	0
	0.2	0.2	0.2	0.1	0.1	0.1	0.1	0.1	0.1	0	0	0
	0.1	0.1	0.1	0.2	0.2	0.1	0	0	0	0	0	0
	0.1	0.1	0.1	0	0	0	0	0	0	0.1	0.1	0.1
	0.1	0.1	0.1	0.1	0.1	0.1	0.1	0.1	0.1	0	0	0
	0.1	0.1	0.1	0.2	0.2	0.1	0.1	0.1	0.1	0	0	0
	0.1	0.1	0.1	0.1	0.1	0.1	0	0	0	0	0	0
	0.2	0.2	0.2	0.1	0.1	0.1	0	0	0	0	0	0
	0.1	0.1	0.1	0.1	0.1	0.1	0.1	0.1	0.1	0	0	0
	0.1	0.1	0.1	0.1	0.1	0.1	0	0	0	0	0	0
	0.1	0.1	0.1	0	0	0	0.1	0.1	0.1	0	0	0
	0.1	0.1	0.1	0.1	0.1	0.1	0	0	0	0	0	0
	0.1	0.1	0.1	0	0	0	0.1	0.1	0.1	0.2	0.2	0
	0.2	0.2	0.2	0.1	0.1	0.1	0	0	0	0	0	0
	0.1	0.1	0.1	1	0.7	0.1	0	0	0	0	0	0
	0.1	0.1	0.1	0.1	0.1	0.1	0	0	0	0	0	0
	0.1	0.1	0.1	0	0	0	0	0	0	0	0	0
	0.1	0.1	0.1	0.1	0.1	0.1	0	0	0	0	0	0
	0.2	0.2	0.2	0.1	0.1	0.1	0	0	0	0	0	0
	0.1	0.1	0.1	0.1	0.1	0.1	0	0	0	0	0	0
	0.1	0.1	0.1	0.1	0.1	0.1	0	0	0	0	0	0
	0.1	0.1	0.1	0.1	0.1	0.1	0.1	0.1	0.1	0	0	0
	0.1	0.1	0.1	0	0	0	0	0	0	0	0	0
	0.1	0.1	0.1	0.1	0.1	0.1	0.1	0.1	0.1	0	0	0
	0.1	0.1	0.1	0.1	0.1	0.1	0	0	0	0	0	0
	0.1	0.1	0.1	0.1	0.1	0.1	0	0	0	0	0	0
	0.1	0.1	0.1	0.7	0.6	0.1	0.1	0.1	0.1	0	0	0
	0.1	0.1	0.1	0.1	0.1	0.1	0.1	0.1	0.1	0	0	0
	0.1	0.1	0.1	0.1	0.1	0.1	0	0	0	0	0	0
	0.1	0.1	0.1	0.1	0.1	0.1	0	0	0	0	0	0
	0.1	0.1	0.1	0.1	0.1	0.1	0.1	0.1	0.1	0	0	0
	0.1	0.1	0.1	0	0	0	0	0	0	0	0	0
	0.1	0.1	0.1	0.1	0.1	0.1	0.1	0.1	0.1	0	0	0
	0.1	0.1	0.1	0.1	0.1	0.1	0.1	0.1	0.1	0	0	0
	0.2	0.2	0.2	0.1	0.1	0.1	0	0	0	0	0	0
	0.1	0.1	0.1	0.1	0.1	0.1	0.1	0.1	0.1	0	0	0
	0.1	0.1	0.1	0.1	0.1	0.1	0	0	0	0	0	0
	0.1	0.1	0.1	0	0	0	0	0	0	0	0	0
	0.1	0.1	0.1	0.1	0.1	0.1	0.1	0.1	0.1	0	0	0
	0.1	0.1	0.1	0.1	0.1	0.1	0.1	0.1	0.1	0	0	0
	0.1	0.1	0.1	0.1	0.1	0.1	0	0	0	0	0	0
	0.1	0.1	0.1	0.1	0.1	0.1	0.1	0.1	0.1	0	0	0
	0.1	0.1	0.1	0.1	0.1	0.1	0.1	0.1	0.1	0	0	0
	0.1	0.1	0.1	0	0	0	0.1	0.1	0.1	0	0	0
	0.1	0.1	0.1	0	0	0	0.1	0.1	0.1	0	0	0
	0.1	0.1	0.1	0	0	0	0.1	0.1	0.1	0	0	0
	0.2	0.2	0.2	0	0	0	0	0	0	0	0	0
	0.1	0.1	0.1	0.1	0.1	0.1	0	0	0	0	0	0
	0.1	0.1	0.1	0.1	0.1	0.1	0	0	0	0	0	0
	0.1	0.1	0.1	0.1	0.1	0.1	0	0	0	0	0	0
	0.1	0.1	0.1	0.1	0.1	0.1	0.1	0.1	0.1	0	0	0
	0.1	0.1	0.1	0.4	0.3	0	0.1	0.1	0.1	0	0	0
	0.1	0.1	0.1	0.1	0.1	0.1	0	0	0	0	0	0
	0.1	0.1	0.1	0.1	0.1	0.1	0.1	0.1	0.1	0	0	0
	0.1	0.1	0.1	0.1	0.1	0.1	0	0	0	0	0	0
	0.1	0.1	0.1	0.1	0.1	0.1	0.1	0.1	0.1	0	0	0
	0.1	0.1	0.1	0.1	0.1	0.1	0.1	0.1	0.1	0	0	0
	0.2	0.2	0.2	0	0	0	0.1	0.1	0.1	0	0	0
	0.1	0.1	0.1	0.1	0.1	0.1	0	0	0	0	0	0
	0.2	0.2	0.2	0.1	0.1	0.1	0	0	0	0	0	0
	0.1	0.1	0.1	0.1	0.1	0.1	0.1	0.1	0.1	0.1	0.1	0.1
	0.1	0.1	0.1	0.1	0.1	0.1	0	0	0	0	0	0
	0.2	0.2	0.2	0.1	0.1	0.1	0	0	0	0	0	0
	0.1	0.1	0.1	0.1	0.1	0.1	0.1	0.1	0.1	0	0	0
	0.1	0.1	0.1	0	0	0	0	0	0	0	0	0
	0.2	0.2	0.2	0.1	0.1	0.1	0	0	0	0	0	0
	0.1	0.1	0.1	0.1	0.1	0.1	0	0	0	0	0	0
	0.1	0.1	0.1	0.1	0.1	0.1	0.1	0.1	0.1	0	0	0
	0.2	0.2	0.2	0	0	0	0	0	0	0	0	0
	0.2	0.2	0.2	0.1	0.1	0.1	0	0	0	0	0	0
	0.1	0.1	0.1	0.1	0.1	0.1	0.1	0.1	0.1	0	0	0
	0.1	0.1	0.1	0.1	0.1	0.1	0.1	0.1	0.1	0	0	0
	0.1	0.1	0.1	0	0	0	0.1	0.1	0.1	0	0	0
	0.1	0.1	0.1	0.1	0.1	0.1	0	0	0	0	0	0
	0.1	0.1	0.1	0.1	0.1	0.1	0.1	0.1	0.1	0	0	0
	0.1	0.1	0.1	0.1	0.1	0.1	0.1	0.1	0.1	0	0	0
	0.1	0.1	0.1	0.1	0.1	0.1	0.1	0.1	0.1	0	0	0
	0.1	0.1	0.1	0.1	0.1	0.1	0.1	0.1	0.1	0	0	0
	0.1	0.1	0.1	0	0	0	0	0	0	0	0	0
	0.1	0.1	0.1	0.1	0.1	0.1	0.1	0.1	0.1	0	0	0
	0.1	0.1	0.1	0.1	0.1	0.1	0.1	0.1	0.1	0.1	0.1	0.1
	0.3	0.3	0.2	0	0	0	0.1	0.1	0.1	0	0	0
	0.1	0.1	0.1	0.1	0.1	0.1	0.1	0.1	0.1	0	0	0
	0.1	0.1	0.1	0	0	0	0.1	0.1	0.1	0	0	0
	0.2	0.2	0.2	0.1	0.1	0.1	0	0	0	0.1	0.1	0.1
	0.1	0.1	0.1	0.1	0.1	0.1	0	0	0	0	0	0
	0.1	0.1	0.1	0.1	0.1	0.1	0.1	0.1	0.1	0	0	0
	0.3	0.3	0.2	0	0	0	0.1	0.1	0.1	0	0	0
	0.1	0.1	0.1	0	0	0	0.1	0.1	0.1	0	0	0
	0.1	0.1	0.1	0.1	0.1	0.1	0.1	0.1	0	0	0	0
	0.1	0.1	0.1	0.1	0.1	0.1	0.1	0.1	0.1	0	0	0
	0.1	0.1	0.1	0.1	0.1	0.1	0	0	0	0	0	0
	0.1	0.1	0.1	0.1	0.1	0.1	0	0	0	0	0	0
	0.1	0.1	0.1	0.1	0.1	0.1	0	0	0	0	0	0
	0.1	0.1	0.1	0	0	0	0	0	0	0	0	0
	0.1	0.1	0.1	0.1	0.1	0.1	0	0	0	0	0	0
	0.2	0.2	0.2	0.1	0.1	0.1	0	0	0	0	0	0
	0.1	0.1	0.1	0.1	0.1	0.1	0	0	0	0	0	0
	0.1	0.1	0.1	0.1	0.1	0.1	0	0	0	0	0	0
	0.1	0.1	0.1	0.1	0.1	0.1	0	0	0	0	0	0
	0.1	0.1	0.1	0	0	0	0	0	0	0	0	0
	0.2	0.2	0.2	0.1	0.1	0.1	0	0	0	0	0	0
	0.1	0.1	0.1	0	0	0	0.1	0.1	0.1	0	0	0
	0.1	0.1	0.1	0.1	0.1	0.1	0.1	0.1	0.1	0	0	0
	0.1	0.1	0.1	0.1	0.1	0.1	0	0	0	0	0	0
	0.2	0.2	0.2	0.2	0.2	0.1	0.1	0.1	0.1	0	0	0
	0.1	0.1	0.1	0	0	0	0.1	0.1	0.1	0	0	0
	0.1	0.1	0.1	0.1	0.1	0.1	0	0	0	0	0	0
	0.1	0.1	0.1	0	0	0	0	0	0	0	0	0
	0.1	0.1	0.1	0	0	0	0.1	0.1	0.1	0	0	0
	0.2	0.2	0.2	0.1	0.1	0.1	0	0	0	0	0	0
	0.2	0.2	0.2	0.1	0.1	0.1	0	0	0	0	0	0
	0.1	0.1	0.1	0	0	0	0	0	0	0	0	0
	0.1	0.1	0.1	0.1	0.1	0.1	0.1	0.1	0.1	0	0	0
	0.2	0.2	0.2	0	0	0	0	0	0	0	0	0
	0.1	0.1	0.1	0.1	0.1	0.1	0.1	0.1	0.1	0	0	0
	0.1	0.1	0.1	0	0	0	0	0	0	0	0	0
	0.1	0.1	0.1	0	0	0	0.1	0.1	0.1	0	0	0
	0.1	0.1	0.1	0.1	0.1	0.1	0	0	0	0	0	0
	0.1	0.1	0.1	0.1	0.1	0.1	0.1	0.1	0.1	0	0	0
	0.1	0.1	0.1	0	0	0	0.1	0.1	0.1	0	0	0
	0.2	0.2	0.2	0.1	0.1	0.1	0	0	0	0	0	0
	0.1	0.1	0.1	0.1	0.1	0.1	0	0	0	0	0	0
	0.1	0.1	0.1	0	0	0	0.1	0.1	0.1	0	0	0
	0.1	0.1	0.1	0.1	0.1	0.1	0	0	0	0	0	0
	0.1	0.1	0.1	0.1	0.1	0.1	0	0	0	0	0	0
	0.1	0.1	0.1	0.1	0.1	0.1	0	0	0	0	0	0
	0.2	0.2	0.2	0	0	0	0	0	0	0	0	0
	0.1	0.1	0.1	0.1	0.1	0.1	0.1	0.1	0.1	0	0	0
	0.1	0.1	0.1	0	0	0	0.1	0.1	0.1	0	0	0
	0.1	0.1	0.1	0.1	0.1	0.1	0	0	0	0	0	0
	0.1	0.1	0.1	0.1	0.1	0.1	0.1	0.1	0.1	0	0	0
	0.1	0.1	0.1	0.1	0.1	0.1	0.1	0.1	0.1	0	0	0
	0.2	0.2	0.2	0.1	0.1	0.1	0.1	0.1	0.1	0	0	0
	0.1	0.1	0.1	0.1	0.1	0.1	0	0	0	0	0	0
	0.1	0.1	0.1	0	0	0	0	0	0	0	0	0
	0.2	0.2	0.2	0.1	0.1	0.1	0	0	0	0	0	0
	0.1	0.1	0.1	0.1	0.1	0.1	0	0	0	0	0	0
	0.2	0.2	0.2	0	0	0	0.1	0.1	0.1	0	0	0
	0.1	0.1	0.1	0.1	0.1	0.1	0	0	0	0	0	0
	0.1	0.1	0.1	0.1	0.1	0.1	0	0	0	0	0	0
	0.1	0.1	0.1	0	0	0	0.1	0.1	0.1	0	0	0
	0.1	0.1	0.1	0.1	0.1	0.1	0.1	0.1	0.1	0	0	0
	0.2	0.2	0.2	0	0	0	0.1	0.1	0.1	0	0	0
	0.1	0.1	0.1	0.1	0.1	0.1	0	0	0	0.1	0.1	0.1
	0.1	0.1	0.1	1.1	0.7	0.1	0	0	0	0	0	0
	0.1	0.1	0.1	0.1	0.1	0.1	0.1	0.1	0.1	0	0	0
	0.1	0.1	0.1	0.1	0.1	0.1	0	0	0	0	0	0
	0.1	0.1	0.1	0	0	0	0.1	0.1	0.1	0	0	0
	0.1	0.1	0.1	0.1	0.1	0.1	0	0	0	0	0	0
	0.1	0.1	0.1	0.1	0.1	0.1	0.1	0.1	0.1	0	0	0
	0.1	0.1	0.1	0.1	0.1	0.1	0.1	0.1	0.1	0	0	0
	0.1	0.1	0.1	0.1	0.1	0.1	0.1	0.1	0.1	0	0	0
	0.2	0.2	0.2	0	0	0	0	0	0	0	0	0
	0.2	0.2	0.2	0.1	0.1	0.1	0.1	0.1	0.1	0	0	0
	0.2	0.2	0.2	0.1	0.1	0.1	0.1	0.1	0.1	0	0	0
	0.2	0.2	0.2	0.1	0.1	0.1	0.1	0.1	0.1	0	0	0
	0.1	0.1	0.1	0.1	0.1	0.1	0.1	0.1	0.1	0	0	0
	0.1	0.1	0.1	0.1	0.1	0.1	0	0	0	0	0	0
	0.2	0.2	0.2	0.1	0.1	0.1	0.1	0.1	0.1	0	0	0
	0.1	0.1	0.1	0.1	0.1	0.1	0.1	0.1	0.1	0	0	0
	0.1	0.1	0.1	0	0	0	0.1	0.1	0.1	0	0	0
	0.5	0.5	0.2	0.1	0.1	0.1	0	0	0	0	0	0
	0.2	0.2	0.2	0.1	0.1	0.1	0.1	0.1	0.1	0	0	0
	0.1	0.1	0.1	0.1	0.1	0.1	0.1	0.1	0.1	0	0	0
	0.2	0.2	0.2	0.1	0.1	0.1	0	0	0	0	0	0
	0.1	0.1	0.1	0	0	0	0	0	0	0	0	0
	0.2	0.2	0.2	0	0	0	0	0	0	0	0	0
	0.1	0.1	0.1	0	0	0	0	0	0	0	0	0
	0.8	0.6	0.1	0	0	0	0.1	0.1	0.1	0	0	0
	0.2	0.2	0.2	0	0	0	0	0	0	0	0	0
	0.1	0.1	0.1	0	0	0	0	0	0	0	0	0
	0.1	0.1	0.1	0.1	0.1	0.1	0	0	0	0	0	0
	0.1	0.1	0.1	0	0	0	0	0	0	0	0	0
	0.2	0.2	0.2	0.1	0.1	0.1	0	0	0	0	0	0
	0.1	0.1	0.1	0.7	0.6	0.1	0.1	0.1	0.1	0	0	0
	0.2	0.2	0.2	0.1	0.1	0.1	0	0	0	0	0	0
	0.1	0.1	0.1	0.1	0.1	0.1	0	0	0	0	0	0
	0.1	0.1	0.1	0.1	0.1	0.1	0	0	0	0	0	0
	0.8	0.7	0.2	0.1	0.1	0.1	0.1	0.1	0.1	0	0	0
	0.1	0.1	0.1	0	0	0	0	0	0	0	0	0
	0.1	0.1	0.1	0	0	0	0.1	0.1	0.1	0	0	0
	0.1	0.1	0.1	0.4	0.4	0.1	0	0	0	0	0	0
	0.1	0.1	0.1	0	0	0	0.1	0.1	0.1	0	0	0
	0.1	0.1	0.1	0	0	0	0	0	0	0	0	0
	0.1	0.1	0.1	0.1	0.1	0.1	0	0	0	0.9	0.6	0.1
	0.1	0.1	0.1	0.1	0.1	0.1	0.1	0.1	0.1	0	0	0
	0.1	0.1	0.1	0.1	0.1	0.1	0.1	0.1	0.1	0	0	0
	0.2	0.2	0.2	0.1	0.1	0.1	0.1	0.1	0.1	0	0	0
	0.1	0.1	0.1	0	0	0	0	0	0	0	0	0
	0.1	0.1	0.1	0	0	0	0	0	0	0	0	0
	0.1	0.1	0.1	0.1	0.1	0.1	0.1	0.1	0.1	0	0	0
	0.2	0.2	0.2	0.1	0.1	0.1	0	0	0	0	0	0
	0.1	0.1	0.1	0.1	0.1	0.1	0	0	0	0	0	0
	0.1	0.1	0.1	0.1	0.1	0.1	0	0	0	0	0	0
	0.1	0.1	0.1	0.1	0.1	0.1	0.1	0.1	0.1	0	0	0
	0.1	0.1	0.1	0.1	0.1	0.1	0	0	0	0	0	0
	0.1	0.1	0.1	0.1	0.1	0.1	0.1	0.1	0.1	0	0	0
	0.2	0.2	0.2	0.1	0.1	0.1	0.1	0.1	0.1	0	0	0
	0.1	0.1	0.1	0	0	0	0	0	0	0	0	0
	0.2	0.2	0.2	0	0	0	0	0	0	0	0	0
	0.1	0.1	0.1	0	0	0	0.1	0.1	0.1	0	0	0
	0.1	0.1	0.1	0.1	0.1	0.1	0	0	0	0	0	0
	0.2	0.2	0.2	0	0	0	0.1	0.1	0.1	0	0	0
	0.1	0.1	0.1	0.1	0.1	0.1	0	0	0	0	0	0
	0.2	0.2	0.2	0.1	0.1	0.1	0	0	0	0	0	0
	0.1	0.1	0.1	0	0	0	0	0	0	0	0	0
	0.2	0.2	0.2	0.1	0.1	0.1	0	0	0	0	0	0
	0.1	0.1	0.1	0	0	0	0	0	0	0	0	0
	0.1	0.1	0.1	0.1	0.1	0.1	0	0	0	0	0	0
	0.1	0.1	0.1	0.2	0.2	0.1	0	0	0	0	0	0
	0.2	0.2	0.2	0.1	0.1	0.1	0	0	0	0	0	0
	0.1	0.1	0.1	0.1	0.1	0.1	0	0	0	0	0	0
	0.2	0.2	0.2	0.1	0.1	0.1	0.1	0.1	0.1	0	0	0
	0.1	0.1	0.1	0.1	0.1	0.1	0.1	0.1	0.1	0	0	0
	0.1	0.1	0.1	0	0	0	0	0	0	0	0	0
	0.1	0.1	0.1	0	0	0	0	0	0	0	0	0
	0.2	0.2	0.2	0.1	0.1	0.1	0	0	0	0	0	0
	0.1	0.1	0.1	0.1	0.1	0.1	0	0	0	0	0	0
	0.1	0.1	0.1	0	0	0	0	0	0	0	0	0
	0.1	0.1	0.1	0.1	0.1	0.1	0	0	0	0	0	0
	0.1	0.1	0.1	0	0	0	0	0	0	0	0	0
	0.1	0.1	0.1	0	0	0	0	0	0	0	0	0
	0.1	0.1	0.1	0.1	0.1	0.1	0	0	0	0	0	0
	0.1	0.1	0.1	0.1	0.1	0.1	0	0	0	0	0	0
	0.1	0.1	0.1	0.1	0.1	0.1	0	0	0	0	0	0
	0.1	0.1	0.1	0.1	0.1	0.1	0.1	0.1	0.1	0	0	0
	0.2	0.2	0.2	0.1	0.1	0.1	0	0	0	0	0	0
	0.1	0.1	0.1	0.1	0.1	0.1	0.1	0.1	0.1	0	0	0
	0.1	0.1	0.1	0.1	0.1	0.1	0	0	0	0	0	0
	0.1	0.1	0.1	0.1	0.1	0.1	0.1	0.1	0.1	0	0	0
	0.2	0.2	0.2	0	0	0	0	0	0	0	0	0
	0.1	0.1	0.1	0	0	0	0	0	0	0	0	0
	0.2	0.2	0.2	0.1	0.1	0.1	0.1	0.1	0.1	0	0	0
	0.2	0.2	0.2	0	0	0	0	0	0	0	0	0
	0.1	0.1	0.1	0.1	0.1	0.1	0.1	0.1	0.1	0	0	0
	0.3	0.3	0.2	0.1	0.1	0.1	0.1	0.1	0.1	0	0	0
	0.1	0.1	0.1	0	0	0	0.1	0.1	0.1	0	0	0
	0.1	0.1	0.1	0.2	0.2	0.1	0.1	0.1	0.1	0	0	0
	0.2	0.2	0.2	0.1	0.1	0.1	0	0	0	0	0	0
	0.1	0.1	0.1	0.1	0.1	0.1	0.1	0.1	0.1	0	0	0
	0.1	0.1	0.1	0.1	0.1	0.1	0	0	0	0	0	0
	0.1	0.1	0.1	0.1	0.1	0.1	0	0	0	0	0	0
	0.1	0.1	0.1	0.1	0.1	0.1	0	0	0	0	0	0
	0.2	0.2	0.2	0.1	0.1	0.1	0	0	0	0	0	0
	0.1	0.1	0.1	0.1	0.1	0.1	0.1	0.1	0.1	0	0	0
	0.2	0.2	0.2	0.1	0.1	0.1	0	0	0	0	0	0
	0.1	0.1	0.1	0.1	0.1	0.1	0	0	0	0	0	0
	0.1	0.1	0.1	0	0	0	0.1	0.1	0.1	0	0	0
	0.2	0.2	0.2	0.1	0.1	0.1	0	0	0	0	0	0
	0.1	0.1	0.1	0	0	0	0	0	0	0	0	0
	0.2	0.2	0.2	0.1	0.1	0.1	0	0	0	0	0	0
	0.2	0.2	0.2	0.1	0.1	0.1	0	0	0	0	0	0
	0.1	0.1	0.1	0	0	0	0	0	0	0	0	0
	0.2	0.2	0.2	0.1	0.1	0.1	0	0	0	0	0	0
	0.1	0.1	0.1	0	0	0	0.1	0.1	0.1	0	0	0
	0.1	0.1	0.1	0.1	0.1	0.1	0	0	0	0	0	0
	0.1	0.1	0.1	0	0	0	0	0	0	0	0	0
	0.1	0.1	0.1	0.1	0.1	0.1	0	0	0	0	0	0
	0.1	0.1	0.1	0.1	0.1	0.1	0	0	0	0	0	0
	0.2	0.2	0.2	0.1	0.1	0.1	0	0	0	0	0	0
	0.2	0.2	0.2	0	0	0	0	0	0	0	0	0
	0.1	0.1	0.1	0.1	0.1	0.1	0.1	0.1	0.1	0	0	0
	0.1	0.1	0.1	0.1	0.1	0.1	0.1	0.1	0.1	0	0	0
	0.1	0.1	0.1	0	0	0	0	0	0	0	0	0
	0.1	0.1	0.1	0.1	0.1	0.1	0	0	0	0	0	0
	0.1	0.1	0.1	0.1	0.1	0.1	0	0	0	0	0	0
	0.1	0.1	0.1	0.3	0.3	0.1	0	0	0	0	0	0
	0.1	0.1	0.1	0	0	0	0.1	0.1	0.1	0	0	0
	0.2	0.2	0.1	0.1	0.1	0.1	0.1	0.1	0.1	0	0	0
	0.2	0.2	0.2	0.1	0.1	0.1	0.1	0.1	0.1	0	0	0
	0.2	0.2	0.2	0	0	0	0.1	0.1	0.1	0	0	0
	0.2	0.2	0.2	0.1	0.1	0.1	0.1	0.1	0.1	0	0	0
	0.2	0.2	0.2	0.1	0.1	0.1	0	0	0	0	0	0
	0.1	0.1	0.1	0.1	0.1	0.1	0	0	0	0	0	0
	0.1	0.1	0.1	0.1	0.1	0.1	0	0	0	0	0	0
	0.1	0.1	0.1	0.1	0.1	0.1	0	0	0	0	0	0
	0.1	0.1	0.1	0	0	0	0.1	0.1	0.1	0	0	0
	0.1	0.1	0.1	0.1	0.1	0.1	0	0	0	0	0	0
	0.1	0.1	0.1	0.1	0.1	0.1	0.1	0.1	0.1	0	0	0
	0.1	0.1	0.1	0.1	0.1	0.1	0	0	0	0	0	0
	0.1	0.1	0.1	0.1	0.1	0.1	0	0	0	0	0	0
	0.1	0.1	0.1	0	0	0	0.1	0.1	0.1	0	0	0
	0.2	0.2	0.2	0.4	0.4	0.1	0.1	0.1	0.1	0	0	0
	0.2	0.2	0.2	0.1	0.1	0.1	0	0	0	0	0	0
	0.1	0.1	0.1	0	0	0	0	0	0	0	0	0
	0.2	0.2	0.2	0	0	0	0.1	0.1	0.1	0	0	0
	0.1	0.1	0.1	0.1	0.1	0.1	0	0	0	0	0	0
	0.1	0.1	0.1	0.1	0.1	0.1	0.1	0.1	0.1	0	0	0
	0.2	0.2	0.2	0.1	0.1	0.1	0.1	0.1	0.1	0	0	0
	0.1	0.1	0.1	0	0	0	0	0	0	0	0	0
	0.2	0.2	0.2	0.1	0.1	0.1	0	0	0	0	0	0
	0.2	0.2	0.2	0.1	0.1	0.1	0.1	0.1	0.1	0	0	0
	0.2	0.2	0.2	0.1	0.1	0.1	0	0	0	0	0	0
	0.1	0.1	0.1	0.1	0.1	0.1	0.1	0.1	0.1	0	0	0
	0.1	0.1	0.1	0	0	0	0.1	0.1	0.1	0	0	0
	0.2	0.2	0.2	0.1	0.1	0.1	0	0	0	0	0	0
	0.1	0.1	0.1	0	0	0	0	0	0	0	0	0
	0.1	0.1	0.1	1.9	0.6	0.1	0	0	0	0	0	0
	0.1	0.1	0.1	0.1	0.1	0.1	0	0	0	0	0	0
	0.2	0.2	0.2	0.1	0.1	0.1	0	0	0	0	0	0
	0.1	0.1	0.1	0.1	0.1	0.1	0	0	0	0	0	0
	0.2	0.2	0.2	0.1	0.1	0.1	0.1	0.1	0.1	0	0	0
	0.2	0.2	0.2	0	0	0	0	0	0	0	0	0
	0.1	0.1	0.1	0.1	0.1	0.1	0.1	0.1	0.1	0	0	0
	0.1	0.1	0.1	0.1	0.1	0.1	0	0	0	0	0	0
	0.2	0.2	0.2	0.1	0.1	0.1	0	0	0	0	0	0
	0.2	0.2	0.2	0.1	0.1	0.1	0	0	0	0	0	0
	0.1	0.1	0.1	0.1	0.1	0.1	0	0	0	0	0	0
	0.1	0.1	0.1	0.1	0.1	0.1	0	0	0	0	0	0
	0.2	0.2	0.2	0.4	0.4	0.2	0.1	0.1	0.1	0	0	0
	0.2	0.2	0.2	0.1	0.1	0.1	0	0	0	0.1	0.1	0.1
	0.1	0.1	0.1	0.1	0.1	0.1	0	0	0	0	0	0
	0.2	0.2	0.2	1	0.6	0.1	0.1	0.1	0	0	0	0
	0.1	0.1	0.1	0.1	0.1	0.1	0	0	0	0	0	0
	0.1	0.1	0.1	0.1	0.1	0.1	0.1	0.1	0.1	0	0	0
	0.1	0.1	0.1	0.7	0.6	0	0	0	0	0	0	0
	0.2	0.2	0.2	0.1	0.1	0.1	0	0	0	0	0	0
	0.2	0.2	0.2	0	0	0	0	0	0	0	0	0
	0.2	0.2	0.2	0	0	0	0.1	0.1	0.1	0	0	0
	0.1	0.1	0.1	0.1	0.1	0.1	0.1	0.1	0.1	0.1	0.1	0.1
	0.1	0.1	0.1	0	0	0	0	0	0	0	0	0
	0.2	0.2	0.2	0.1	0.1	0.1	0	0	0	0	0	0
	0.1	0.1	0.1	0.1	0.1	0.1	0.1	0.1	0.1	0	0	0
	0.1	0.1	0.1	0.1	0.1	0.1	0	0	0	0	0	0
	0.1	0.1	0.1	0.1	0.1	0.1	0.1	0.1	0.1	0	0	0
	0.2	0.2	0.2	0	0	0	0	0	0	0	0	0
	0.2	0.2	0.2	0.9	0.6	0	0.1	0.1	0.1	0.1	0.1	0.1
	0.1	0.1	0.1	0.1	0.1	0.1	0	0	0	0	0	0
	0.1	0.1	0.1	0.1	0.1	0.1	0	0	0	0	0	0
	0.2	0.2	0.2	0.1	0.1	0.1	0	0	0	0	0	0
	0.8	0.7	0.2	0.1	0.1	0.1	0	0	0	0	0	0
	0.1	0.1	0.1	0.2	0.2	0.1	0	0	0	0.1	0.1	0.1
	0.1	0.1	0.1	0	0	0	0	0	0	0	0	0
	0.1	0.1	0.1	0.1	0.1	0.1	0	0	0	0	0	0
	0.1	0.1	0.1	0.1	0.1	0.1	0.1	0.1	0.1	0	0	0
	0.1	0.1	0.1	0.1	0.1	0.1	0	0	0	0	0	0
	0.2	0.2	0.2	0.1	0.1	0.1	0	0	0	0	0	0
	0.1	0.1	0.1	0	0	0	0	0	0	0	0	0
	0.1	0.1	0.1	0.8	0.6	0.1	0.1	0.1	0.1	0	0	0
	0.2	0.2	0.2	0.1	0.1	0.1	0	0	0	0	0	0
	0.1	0.1	0.1	0.2	0.2	0.2	0.1	0.1	0.1	0	0	0
	0.2	0.2	0.2	0.1	0.1	0.1	0.1	0.1	0.1	0	0	0
	0.2	0.2	0.2	0.1	0.1	0.1	0.1	0.1	0.1	0	0	0
	0.1	0.1	0.1	0	0	0	0	0	0	0	0	0
	0.1	0.1	0.1	0	0	0	0	0	0	0	0	0
	0.1	0.1	0.1	0.1	0.1	0.1	0	0	0	0	0	0
	0.2	0.2	0.2	0.1	0.1	0.1	0.1	0.1	0.1	0	0	0
	0.1	0.1	0.1	0.1	0.1	0.1	0.1	0.1	0.1	0	0	0
	0.2	0.2	0.2	0.1	0.1	0.1	0	0	0	0	0	0
	0.1	0.1	0.1	0.1	0.1	0.1	0.1	0.1	0.1	0	0	0
	0.1	0.1	0.1	0.1	0.1	0.1	0	0	0	0	0	0
	0.1	0.1	0.1	0.1	0.1	0.1	0	0	0	0	0	0
	0.1	0.1	0.1	0.1	0.1	0.1	0	0	0	0	0	0
	0.1	0.1	0.1	0.1	0.1	0.1	0	0	0	0	0	0
	0.2	0.2	0.1	1	0.6	0.1	0.1	0.1	0.1	0	0	0
	0.1	0.1	0.1	0	0	0	0	0	0	0	0	0
	0.2	0.2	0.2	0.1	0.1	0.1	0.1	0.1	0.1	0	0	0
	0.1	0.1	0.1	0.1	0.1	0.1	0	0	0	0	0	0
	0.2	0.2	0.2	0	0	0	0	0	0	0	0	0
	0.1	0.1	0.1	0.1	0.1	0.1	0	0	0	0	0	0
	0.1	0.1	0.1	0.1	0.1	0.1	0	0	0	0	0	0
	0.1	0.1	0.1	0.1	0.1	0.1	0.1	0.1	0.1	0	0	0
	0.1	0.1	0.1	0	0	0	0.1	0.1	0.1	0	0	0
	0.1	0.1	0.1	0.1	0.1	0.1	0.1	0.1	0.1	0	0	0
	0.1	0.1	0.1	0.1	0.1	0.1	0	0	0	0	0	0
	0.1	0.1	0.1	0	0	0	0.1	0.1	0.1	0	0	0
	0.1	0.1	0.1	0.1	0.1	0.1	0	0	0	0	0	0
	0.2	0.2	0.1	0.2	0.2	0.1	0	0	0	0	0	0
	0.2	0.2	0.2	0.1	0.1	0.1	0	0	0	0	0	0
	0.1	0.1	0.1	0	0	0	0.1	0.1	0.1	0	0	0
	0.1	0.1	0.1	0.1	0.1	0.1	0	0	0	0.1	0.1	0.1
	0.2	0.2	0.2	0	0	0	0.1	0.1	0.1	0	0	0
	0.2	0.2	0.2	0.1	0.1	0.1	0	0	0	0	0	0
	0.1	0.1	0.1	0.1	0.1	0.1	0	0	0	0	0	0
	0.1	0.1	0.1	0.1	0.1	0.1	0.1	0.1	0.1	0	0	0
	0.1	0.1	0.1	0.1	0.1	0.1	0.1	0.1	0.1	0	0	0
	0.2	0.2	0.2	0.1	0.1	0.1	0	0	0	0	0	0
	0.2	0.2	0.2	0.1	0.1	0.1	0.2	0.2	0.1	0	0	0
	0.2	0.2	0.2	0.4	0.3	0	0	0	0	0	0	0
	0.1	0.1	0.1	0.1	0.1	0.1	0.1	0.1	0.1	0	0	0
	0.1	0.1	0.1	0.1	0.1	0.1	0.1	0.1	0.1	0	0	0
	0.2	0.2	0.2	0.1	0.1	0.1	0.1	0.1	0.1	0	0	0
	0.2	0.2	0.2	0.1	0.1	0.1	0	0	0	0	0	0
	0.2	0.2	0.2	0	0	0	0	0	0	0	0	0
	0.1	0.1	0.1	0.1	0.1	0.1	0	0	0	0	0	0
	0.1	0.1	0.1	1.1	0.9	0.1	0	0	0	0	0	0
	0.1	0.1	0.1	0.1	0.1	0.1	0	0	0	0	0	0
	0.1	0.1	0.1	0.1	0.1	0.1	0.1	0.1	0.1	0	0	0
	0.1	0.1	0.1	1	0.6	0.1	0.1	0.1	0.1	0	0	0
	0.1	0.1	0.1	0	0	0	0	0	0	0	0	0
	0.1	0.1	0.1	0.1	0.1	0.1	0	0	0	0	0	0
	0.1	0.1	0.1	0.4	0.4	0.1	0.1	0.1	0.1	0	0	0
	0.1	0.1	0.1	0	0	0	0	0	0	0	0	0
	0.1	0.1	0.1	0.1	0.1	0.1	0	0	0	0	0	0
	0.1	0.1	0.1	1	0.6	0.1	0	0	0	0	0	0
	0.2	0.2	0.2	0.1	0.1	0.1	0	0	0	0	0	0
	0.1	0.1	0.1	0	0	0	0	0	0	0	0	0
	0.1	0.1	0.1	0.1	0.1	0.1	0	0	0	0	0	0
	0.1	0.1	0.1	0.1	0.1	0.1	0	0	0	0	0	0
	0.2	0.2	0.2	0.1	0.1	0.1	0	0	0	0	0	0
	0.2	0.2	0.2	0.1	0.1	0.1	0	0	0	0	0	0
	0.1	0.1	0.1	0.1	0.1	0.1	0	0	0	0	0	0
	0.2	0.2	0.2	0.1	0.1	0.1	0	0	0	0	0	0
	0.5	0.5	0.2	3.9	2.4	0.1	0	0	0	0	0	0
	0.1	0.1	0.1	0.1	0.1	0.1	0	0	0	0	0	0
	0.1	0.1	0.1	0.1	0.1	0.1	0.1	0.1	0.1	0	0	0
	0.2	0.2	0.2	0.1	0.1	0.1	0	0	0	0	0	0
	0.3	0.3	0.2	0.1	0.1	0.1	0	0	0	0	0	0
	0.1	0.1	0.1	0.1	0.1	0.1	0.1	0.1	0.1	0	0	0
	0.1	0.1	0.1	0.1	0.1	0.1	0.1	0.1	0.1	0	0	0
	0.1	0.1	0.1	0.1	0.1	0.1	0.1	0.1	0.1	0	0	0
	0.2	0.2	0.2	0.1	0.1	0.1	0	0	0	0	0	0
	0.2	0.2	0.2	0	0	0	0	0	0	0	0	0
	0.2	0.2	0.2	0.2	0.2	0.1	0.1	0.1	0.1	0	0	0
	0.2	0.2	0.2	0.1	0.1	0.1	0	0	0	0	0	0
	0.1	0.1	0.1	0.1	0.1	0.1	0	0	0	0	0	0
	0.2	0.2	0.2	1	0.6	0.1	0	0	0	0	0	0
	0.2	0.2	0.2	0	0	0	0.1	0.1	0.1	0	0	0
	0.2	0.2	0.2	0	0	0	0	0	0	0	0	0
	0.2	0.2	0.2	0.1	0.1	0.1	0	0	0	0	0	0
	0.1	0.1	0.1	0.1	0.1	0.1	0	0	0	0	0	0
	0.2	0.2	0.2	0.1	0.1	0.1	0	0	0	0	0	0
	0.1	0.1	0.1	0	0	0	0.1	0.1	0.1	0	0	0
	0.1	0.1	0.1	0.1	0.1	0.1	0	0	0	0	0	0
	0.1	0.1	0.1	0.2	0.2	0.2	0.1	0.1	0.1	0	0	0
	0.1	0.1	0.1	0.1	0.1	0.1	0	0	0	0.1	0.1	0.1
	0.1	0.1	0.1	0.1	0.1	0.1	0.1	0.1	0.1	0	0	0
	0.1	0.1	0.1	0.1	0.1	0.1	0	0	0	0	0	0
	0.1	0.1	0.1	0.1	0.1	0.1	0	0	0	0	0	0
	0.2	0.2	0.2	0	0	0	0	0	0	0	0	0
	0.1	0.1	0.1	0.1	0.1	0.1	0	0	0	0	0	0
	0.1	0.1	0.1	0.1	0.1	0.1	0	0	0	0	0	0
	0.1	0.1	0.1	0.1	0.1	0.1	0	0	0	0	0	0
	0.2	0.2	0.2	0.1	0.1	0.1	0.1	0.1	0.1	0	0	0
	0.1	0.1	0.1	0.1	0.1	0.1	0	0	0	0	0	0
	0.1	0.1	0.1	0.1	0.1	0.1	0	0	0	0	0	0
	0.1	0.1	0.1	0.1	0.1	0.1	0	0	0	0.1	0.1	0.1
	0.2	0.2	0.2	0	0	0	0.1	0.1	0.1	0	0	0
	0.1	0.1	0.1	0.1	0.1	0.1	0.1	0.1	0.1	0	0	0
	0.1	0.1	0.1	0.1	0.1	0.1	0.1	0.1	0.1	0	0	0
	0.2	0.2	0.2	0.1	0.1	0.1	0.1	0.1	0.1	0	0	0
	0.1	0.1	0.1	0	0	0	0.1	0.1	0.1	0	0	0
	0.2	0.2	0.2	0.1	0.1	0.1	0	0	0	0	0	0
	0.1	0.1	0.1	0.1	0.1	0.1	0.1	0.1	0.1	0	0	0
	0.2	0.2	0.2	0.1	0.1	0.1	0	0	0	0	0	0
	0.1	0.1	0.1	0.1	0.1	0.1	0	0	0	0	0	0
	0.2	0.2	0.2	0.1	0.1	0.1	0	0	0	0	0	0
	0.1	0.1	0.1	0	0	0	0	0	0	0	0	0
	0.1	0.1	0.1	0.1	0.1	0.1	0.1	0.1	0.1	0	0	0
	0.2	0.2	0.1	0.1	0.1	0.1	0	0	0	0	0	0
	0.1	0.1	0.1	0	0	0	0	0	0	0	0	0
	0.1	0.1	0.1	0	0	0	0	0	0	0	0	0
	0.1	0.1	0.1	0.1	0.1	0.1	0	0	0	0	0	0
	0.1	0.1	0.1	0.1	0.1	0.1	0.1	0.1	0.1	0	0	0
	0.1	0.1	0.1	0.1	0.1	0.1	0	0	0	0	0	0
	0.1	0.1	0.1	0	0	0	0.1	0.1	0.1	0	0	0
	0.1	0.1	0.1	0.1	0.1	0.1	0	0	0	0	0	0
	0.1	0.1	0.1	0.1	0.1	0.1	0	0	0	0	0	0
	0.1	0.1	0.1	0	0	0	0.1	0.1	0.1	0	0	0
	0.1	0.1	0.1	0.1	0.1	0.1	0	0	0	0	0	0
	0.2	0.2	0.2	0.1	0.1	0.1	0.1	0.1	0.1	0	0	0
	0.1	0.1	0.1	0.1	0.1	0.1	0	0	0	0	0	0
	0.2	0.2	0.2	0.1	0.1	0.1	0	0	0	0	0	0
	0.1	0.1	0.1	0.1	0.1	0.1	0	0	0	0	0	0
	0.1	0.1	0.1	0	0	0	0	0	0	0	0	0
	0.1	0.1	0.1	0.1	0.1	0.1	0.1	0.1	0.1	0	0	0
	0.2	0.2	0.2	0.1	0.1	0.1	0	0	0	0	0	0
	0.2	0.2	0.2	0.1	0.1	0.1	0	0	0	0	0	0
	0.1	0.1	0.1	0.1	0.1	0.1	0	0	0	0	0	0
	0.1	0.1	0.1	0.1	0.1	0.1	0.1	0.1	0.1	0	0	0
	0.1	0.1	0.1	0.1	0.1	0.1	0	0	0	0	0	0
	0.2	0.2	0.2	0.1	0.1	0.1	0	0	0	0	0	0
	0.2	0.2	0.2	0.1	0.1	0.1	0	0	0	0	0	0
	0.2	0.2	0.2	0.1	0.1	0.1	0	0	0	0	0	0
	0.1	0.1	0.1	0	0	0	0	0	0	0	0	0
	0.2	0.2	0.2	0.1	0.1	0.1	0	0	0	0	0	0
	0.1	0.1	0.1	0.1	0.1	0.1	0	0	0	0	0	0
	0.2	0.2	0.2	0.1	0.1	0.1	0	0	0	0	0	0
	0.1	0.1	0.1	0.1	0.1	0.1	0	0	0	0	0	0
	0.1	0.1	0.1	0.1	0.1	0.1	0	0	0	0	0	0
	0.2	0.2	0.2	0.1	0.1	0.1	0	0	0	0	0	0
	0.1	0.1	0.1	0	0	0	0	0	0	0	0	0
	0.1	0.1	0.1	0.1	0.1	0.1	0	0	0	0	0	0
	0.1	0.1	0.1	0.1	0.1	0.1	0.1	0.1	0.1	0	0	0
	0.5	0.4	0.2	0.1	0.1	0.1	0	0	0	0	0	0
	0.2	0.2	0.2	0.1	0.1	0.1	0.1	0.1	0.1	0.1	0.1	0.1
	0.2	0.2	0.2	0	0	0	0	0	0	0	0	0
	0.1	0.1	0.1	0.1	0.1	0.1	0	0	0	0	0	0
	0.2	0.2	0.2	0.1	0.1	0.1	1	0.6	0.1	0	0	0
	0.2	0.2	0.2	0	0	0	0	0	0	0	0	0
	0.1	0.1	0.1	0.1	0.1	0.1	0	0	0	0	0	0
	0.1	0.1	0.1	0.1	0.1	0.1	0.1	0.1	0.1	0	0	0
	0.1	0.1	0.1	0.1	0.1	0.1	0.1	0.1	0.1	0	0	0
	0.2	0.2	0.2	0.1	0.1	0.1	0.1	0.1	0.1	0	0	0
	0.1	0.1	0.1	0.1	0.1	0.1	0	0	0	0	0	0
	0.1	0.1	0.1	0	0	0	0	0	0	0	0	0
	0.1	0.1	0.1	0.1	0.1	0.1	0	0	0	0	0	0
	0.1	0.1	0.1	0.1	0.1	0.1	0	0	0	0	0	0
	0.2	0.2	0.2	0.1	0.1	0.1	0.1	0.1	0.1	0	0	0
	0.1	0.1	0.1	0.1	0.1	0.1	0	0	0	0	0	0
	0.1	0.1	0.1	0	0	0	0	0	0	0	0	0
	0.2	0.2	0.2	0.1	0.1	0.1	0	0	0	0	0	0
	0.2	0.2	0.2	0	0	0	0	0	0	0	0	0
	0.1	0.1	0.1	0.1	0.1	0.1	0	0	0	0	0	0
	0.1	0.1	0.1	0.2	0.2	0.2	0	0	0	0	0	0
	0.1	0.1	0.1	0	0	0	0	0	0	0	0	0
	0.1	0.1	0.1	0.1	0.1	0.1	0	0	0	0	0	0
	0.2	0.2	0.2	0	0	0	0	0	0	0	0	0
	0.1	0.1	0.1	0.1	0.1	0.1	0.1	0.1	0.1	0	0	0
	0.3	0.3	0.2	0.1	0.1	0.1	0.1	0.1	0.1	0	0	0
	0.2	0.2	0.2	0.1	0.1	0.1	0	0	0	0	0	0
	0.2	0.2	0.2	0.1	0.1	0.1	0	0	0	0.1	0.1	0.1
	0.2	0.2	0.2	0.1	0.1	0.1	0	0	0	0	0	0
	0.1	0.1	0.1	0.1	0.1	0.1	0	0	0	0	0	0
	0.2	0.2	0.2	0	0	0	0.1	0.1	0.1	0	0	0
	0.1	0.1	0.1	0.1	0.1	0.1	0	0	0	0	0	0
	0.1	0.1	0.1	0.1	0.1	0.1	0	0	0	0	0	0
	0.1	0.1	0.1	0.1	0.1	0.1	0	0	0	0	0	0
	0.2	0.2	0.2	0.1	0.1	0.1	0.1	0.1	0.1	0	0	0
	0.1	0.1	0.1	0.4	0.3	0	0	0	0	0.1	0.1	0.1
	0.2	0.2	0.2	0.1	0.1	0.1	0	0	0	0	0	0
	0.1	0.1	0.1	0.1	0.1	0.1	0	0	0	0	0	0
	0.2	0.2	0.2	0.1	0.1	0.1	0	0	0	0	0	0
	0.1	0.1	0.1	0.1	0.1	0.1	0	0	0	0	0	0
	0.1	0.1	0.1	0.1	0.1	0.1	0.1	0.1	0.1	0	0	0
	0.2	0.2	0.2	0.1	0.1	0.1	0.1	0.1	0.1	0	0	0
	0.2	0.2	0.2	0.1	0.1	0.1	0	0	0	0	0	0
	0.2	0.2	0.2	0.1	0.1	0.1	0.1	0.1	0.1	0	0	0
	0.1	0.1	0.1	0.1	0.1	0.1	0	0	0	0	0	0
	0.2	0.2	0.2	0.1	0.1	0.1	0	0	0	0	0	0
	0.2	0.2	0.2	0.4	0.4	0.1	0.1	0.1	0.1	0	0	0
	0.1	0.1	0.1	0.1	0.1	0.1	0	0	0	0	0	0
	0.2	0.2	0.2	0.1	0.1	0.1	0	0	0	0	0	0
	0.2	0.2	0.2	0.1	0.1	0.1	0.1	0.1	0.1	0	0	0
	0.1	0.1	0.1	0.1	0.1	0.1	0	0	0	0	0	0
	0.1	0.1	0.1	0.1	0.1	0.1	0	0	0	0	0	0
	0.2	0.2	0.2	0.1	0.1	0.1	0.1	0.1	0.1	0.4	0.3	0
	0.1	0.1	0.1	0.1	0.1	0.1	0.9	0.6	0	0	0	0
	0.1	0.1	0.1	0.1	0.1	0.1	0.1	0.1	0.1	0	0	0
	0.1	0.1	0.1	0.1	0.1	0.1	0	0	0	0	0	0
	0.2	0.2	0.2	0.1	0.1	0.1	0	0	0	0	0	0
	0.1	0.1	0.1	0.1	0.1	0.1	0.1	0.1	0.1	0	0	0
	0.2	0.2	0.2	0	0	0	0.1	0.1	0.1	0	0	0
	0.1	0.1	0.1	0.1	0.1	0.1	0	0	0	0	0	0
	0.1	0.1	0.1	0.1	0.1	0.1	0	0	0	0	0	0
	0.2	0.2	0.2	0	0	0	0	0	0	0	0	0
	0.1	0.1	0.1	0.1	0.1	0.1	0.1	0.1	0.1	0	0	0
	0.1	0.1	0.1	0	0	0	0	0	0	0	0	0
	0.1	0.1	0.1	0.1	0.1	0.1	0	0	0	0	0	0
	0.2	0.2	0.2	0.1	0.1	0.1	0	0	0	0	0	0
	0.1	0.1	0.1	0.1	0.1	0.1	0	0	0	0	0	0
	0.1	0.1	0.1	0.1	0.1	0.1	0.1	0.1	0.1	0	0	0
	0.1	0.1	0.1	0	0	0	0.1	0.1	0.1	0	0	0
	0.1	0.1	0.1	0.1	0.1	0.1	0	0	0	0	0	0
	0.1	0.1	0.1	0.1	0.1	0.1	0	0	0	0	0	0
	0.2	0.2	0.2	0	0	0	0.1	0.1	0.1	0	0	0
	0.1	0.1	0.1	0	0	0	0	0	0	0	0	0
	0.2	0.2	0.2	0	0	0	0	0	0	0	0	0
	0.2	0.2	0.2	0.1	0.1	0.1	0	0	0	0	0	0
	0.2	0.2	0.2	0.2	0.2	0.2	0	0	0	0	0	0
	0.2	0.2	0.2	0.1	0.1	0.1	0.1	0.1	0.1	0	0	0
	0.2	0.2	0.2	0	0	0	0	0	0	0	0	0
	0.1	0.1	0.1	0.1	0.1	0.1	0.1	0.1	0.1	0	0	0
	0.8	0.6	0.1	0.1	0.1	0.1	0.2	0.2	0.2	0	0	0
	0.1	0.1	0.1	0.1	0.1	0.1	0.1	0.1	0.1	0	0	0
	0.1	0.1	0.1	0.1	0.1	0.1	0.1	0.1	0.1	0	0	0
	0.2	0.2	0.2	0.1	0.1	0.1	0.1	0.1	0.1	0	0	0
	0.2	0.2	0.2	0.1	0.1	0.1	0	0	0	0	0	0
	0.1	0.1	0.1	0.1	0.1	0.1	0.1	0.1	0.1	0	0	0
	0.1	0.1	0.1	0.1	0.1	0.1	1.4	0.6	0.1	0	0	0
	0.2	0.2	0.2	0.1	0.1	0.1	0	0	0	0	0	0
	0.2	0.2	0.2	0.1	0.1	0.1	0.1	0.1	0.1	0	0	0
	0.1	0.1	0.1	0.1	0.1	0.1	0.1	0.1	0.1	0	0	0
	0.1	0.1	0.1	0.1	0.1	0.1	0.1	0.1	0.1	0	0	0
	0.1	0.1	0.1	0.1	0.1	0.1	0	0	0	0	0	0
	0.2	0.2	0.2	0.1	0.1	0.1	0.1	0.1	0.1	0	0	0
	0.2	0.2	0.2	0.1	0.1	0.1	0	0	0	0	0	0
	0.1	0.1	0.1	0	0	0	0	0	0	0	0	0
	0.1	0.1	0.1	0.1	0.1	0.1	0.1	0.1	0.1	0	0	0
	0.1	0.1	0.1	0.8	0.6	0.1	0.1	0.1	0.1	0	0	0
	0.1	0.1	0.1	0.1	0.1	0.1	0	0	0	0	0	0
	0.2	0.2	0.2	0.1	0.1	0.1	0	0	0	0	0	0
	0.1	0.1	0.1	0.1	0.1	0.1	0.1	0.1	0.1	0	0	0
	0.2	0.2	0.2	0	0	0	0	0	0	0	0	0
	0.2	0.2	0.2	0.2	0.1	0.1	0	0	0	0	0	0
	0.2	0.2	0.2	0.1	0.1	0.1	0	0	0	0	0	0
	0.1	0.1	0.1	0.1	0.1	0.1	0	0	0	0	0	0
	0.2	0.2	0.2	0.1	0.1	0.1	0.1	0.1	0.1	0	0	0
	0.1	0.1	0.1	0.1	0.1	0.1	0	0	0	0	0	0
	0.1	0.1	0.1	0.1	0.1	0.1	0.1	0.1	0.1	0	0	0
	0.2	0.2	0.2	0.1	0.1	0.1	0	0	0	0	0	0
	0.2	0.2	0.2	0.1	0.1	0.1	0	0	0	0	0	0
	0.1	0.1	0.1	0.1	0.1	0.1	0	0	0	0	0	0
	0.2	0.2	0.2	0.1	0.1	0.1	0	0	0	0.1	0.1	0.1
	0.1	0.1	0.1	0.1	0.1	0.1	0	0	0	0	0	0
	0.1	0.1	0.1	0.9	0.6	0	0.1	0.1	0.1	0	0	0
	0.1	0.1	0.1	0.1	0.1	0.1	0	0	0	0	0	0
	0.2	0.2	0.2	0.1	0.1	0.1	0	0	0	0	0	0
	0.1	0.1	0.1	0	0	0	0	0	0	0	0	0
				0.1	0.1	0.1	0	0	0	0	0	0
				0.1	0.1	0.1	0	0	0	0	0	0
				0.1	0.1	0.1	0	0	0	0	0	0
				0.1	0.1	0.1	0	0	0	0	0	0
				0.1	0.1	0.1	0	0	0	0	0	0
				0.1	0.1	0.1	0	0	0	0	0	0
				0.1	0.1	0.1	0	0	0	0	0	0
				0	0	0	0	0	0	0	0	0
				0.1	0.1	0.1				0	0	0
				0.1	0.1	0.1				0	0	0
				0.1	0.1	0.1				0	0	0
				0.1	0.1	0.1				0	0	0
				0.1	0.1	0.1				0	0	0
				0.1	0.1	0.1				0	0	0
				0.1	0.1	0.1				0	0	0
				0.1	0.1	0.1				0	0	0
				0.1	0.1	0.1				0.1	0.1	0.1
				0.1	0.1	0.1				0	0	0
				0.1	0.1	0.1				0.1	0.1	0.1
				0.1	0.1	0.1				0	0	0
				0.1	0.1	0.1				0	0	0
				0.1	0.1	0.1				0.1	0.1	0.1
				0.1	0.1	0.1				0	0	0
				0.1	0.1	0.1				0.1	0.1	0.1
				0.1	0.1	0.1				0.1	0.1	0.1
				0.1	0.1	0.1				0	0	0
				0.1	0.1	0.1				0	0	0
				0.1	0.1	0.1				0	0	0
				0.1	0.1	0.1				0	0	0
				0.1	0.1	0.1				0.1	0.1	0.1
				0.5	0.5	0.4				0.1	0.1	0.1
				2.2	0.9	0.4				0.2	0.2	0.1
				0.2	0.2	0.2				0	0	0
				0.3	0.3	0.3				0	0	0
				0.7	0.6	0.3				0	0	0
				0.2	0.2	0.2				0	0	0
				0.2	0.2	0.2				0	0	0
				0.3	0.3	0.3				0	0	0
				0.1	0.1	0.1				0	0	0
				1.8	1.3	0.3				0	0	0
				0.2	0.2	0.2				0	0	0
				0.1	0.1	0.1				0	0	0
				0.4	0.4	0.2				0	0	0
				0.1	0.1	0.1				0	0	0
				0.1	0.1	0.1				0	0	0
				0.1	0.1	0.1				0	0	0
				0.2	0.2	0.2				0.1	0.1	0.1
				1	0.6	0.1				0	0	0
				0.1	0.1	0.1				0.1	0.1	0.1
				2.2	0.9	0.2				0.1	0.1	0.1
				0.1	0.1	0.1				0.1	0.1	0.1
				0.1	0.1	0.1				0	0	0
				0.3	0.3	0.2				0	0	0
				0.1	0.1	0.1				0.1	0.1	0.1
				0.1	0.1	0.1				0	0	0
				0.1	0.1	0.1				0.1	0.1	0.1
				0.1	0.1	0.1				0	0	0
				0.1	0.1	0.1				0	0	0
				0.1	0.1	0.1				0.1	0.1	0.1
				0.7	0.5	0				0	0	0
				0	0	0				0	0	0
				0	0	0				0.1	0.1	0.1
				0	0	0				0.1	0.1	0.1
				0.1	0.1	0.1				0	0	0
				0	0	0				0	0	0
				0.2	0.2	0.1				0	0	0
				1	0.6	0.1				0	0	0
				0	0	0				0	0	0
				0.2	0.2	0.1
				0	0	0
	0	0	0	0	0	0	0	0	0	0	0	0
	0	0	0	0	0	0.1	0	0	0.1	0	0	0
	0	0	0	0	0	0	0	0	0	0	0	0
	0	0	0	0	0.1	0.1	0	0	0	0	0	0
	0	0	0.1	0	0	0	0	0	0	0	0	0
	0	0	0	0	0	0	0	0	0	0	0	0
	0	0	0	0	0	0	0	0	0.1	0	0	0
	0	0	0	4.4	0.4	0.1	0	0	0.1	0	0	0
	0	0	0.1	0	0	0	0	0	0	0	0	0
	0	0	0.1	0	0	0	0	0	0.1	0	0	0
	0	0	0	0.3	0.6	0	0	0	0	0	0	0
	0	0	0.1	0	0	0	0	0	0	0	0	0
	0	0	0.1	0	0	0	0	0	0.1	0	0	0
	0	0	0.1	0.8	1.1	0.1	0	0	0	0	0	0
	0	0.1	0	0	0	0.1	0	0	0	0	0	0
	0	0	0	0	0	0	0	0	0	0	0	0
	0	0	0.1	0	0	0.1	0	0	0	0	0.1	0
	0	0	0.1	0.4	0.5	0.1	0	0	0	0	0	0
	0	0	0.1	0	0	0	0	0	0	0	0	0
	0	0	0.1	0	0	0	0	0	0	0	0	0
	0	0	0	0	0	0.1	0	0	0	0.1	0.3	0
	0	0	0.1	0	0	0	0	0.1	0.1	0	0	0
	0	0	0	0	0	0	0	0	0	0	0	0
	0	0	0	0	0.1	0.1	0	0	0	0	0	0
	0	0	0	0.1	0.9	0.1	0	0	0.1	0.2	0.5	0
	0	0	0	0	0	0.1	0	0	0	0	0	0
	0	0	0.1	0	0	0	0	0	0	0	0	0
	0	0	0	0	0	0	0	0	0	0	0	0
	0	0	0	0	0	0	0	0	0	0	0	0
	0	0	0	0.1	0.3	0	0.2	0.5	0	0	0	0
	0	0	0.1	0.1	0.3	0	0	0	0	0	0	0
	0	0	0.1	0	0	0	0	0	0	0	0	0.1
	0	0	0	0	0	0	0	0	0	0	0	0
	0	0	0	0	0	0.1	0	0	0.1	0	0	0
	0	0	0	0	0	0.1	0	0	0	0	0	0
	0	0	0.1	0	0	0	0	0	0.1	0	0	0
	0	0	0	0	0	0.1	0.3	0.7	0.1	0	0	0
	0	0	0	0	0	0	0	0	0.1	0	0	0
	0	0	0.1	0	0	0	0	0	0	0	0	0
	0	0	0	0	0	0	0	0	0	0	0	0
	0	0	0.1	0	0	0.1	0	0	0	0	0	0
	0	0	0	0	0	0.1	0	0	0	0	0	0
	0	0	0.1	0	0	0.1	0	0	0	0	0	0
	0	0	0	0	0	0.1	0	0	0	0	0	0
	0	0	0	0	0	0	0	0	0	0	0	0
	0	0	0.1	0.6	0.6	0.1	0	0	0.1	0	0	0
	0	0	0.1	0	0	0	0	0	0	0	0	0
	0	0	0.1	0	0	0	0	0	0.1	0	0	0
	0	0	0	0	0	0	0	0	0.1	0	0	0
	0	0	0	0.4	0.5	0.1	0	0	0	0	0	0
	0	0	0	0	0	0	0	0.1	0.1	0	0	0
	0	0	0.1	0	0	0	0	0	0.1	0	0	0
	0	0	0.1	0.3	0.6	0	0	0	0	0	0	0
	0	0	0	0	0	0.1	0	0	0	0	0	0
	0	0	0.1	0	0	0.1	0	0	0	0	0	0
	0	0	0.1	0	0	0	0	0	0	0	0	0
	0	0	0.1	0	0	0	0	0	0.1	0	0	0
	0	0	0	0.4	0.5	0.1	0	0	0	0	0	0
	0	0	0.1	0	0	0	0	0	0	0	0	0
	0	0	0.1	0	0	0.1	0	0	0.1	0	0	0
	0	0	0.1	0	0	0.1	0	0	0	0	0	0
	0	0	0.1	0	0	0.1	0	0	0	0	0	0
	0	0.3	0.1	0	0	0	0	0	0.1	0	0	0.1
	0	0	0	0	0	0.1	0	0	0	0	0	0
	0	0	0.1	0	0	0.1	0	0	0.1	0	0	0
	0	0	0.1	0	0	0.1	0.1	0.5	0.1	0	0	0
	0	0	0.1	0	0	0	0	0	0.1	0	0	0
	0	0	0.1	0	0	0	0.3	0.6	0	0	0.1	0
	0	0	0.1	0	0	0.1	0	0	0	0	0	0
	0	0	0	0	0	0	0	0	0.1	0	0	0
	0	0	0.1	0	0	0	0	0	0.1	0	0	0
	0	0	0	0	0	0	0	0	0.1	0	0	0
	0	0	0	0	0	0.1	0	0	0.1	0	0	0
	0	0	0.1	0	0	0	0	0	0.1	0	0	0
	0	0	0	0	0	0	0	0	0.1	0	0	0
	0	0	0.1	0	0	0.1	0	0	0.1	0	0	0
	0	0	0.1	0	0	0	0	0	0	0	0	0
	0	0	0.1	0	0	0	0	0	0	0	0	0
	0	0	0.1	0	0	0.1	0	0	0	0	0	0
	0	0	0.1	0	0	0	0	0	0.1	0	0	0
	0	0	0.1	0	0	0.1	0	0	0	0	0	0
	0	0	0.1	0	0	0	0	0	0.1	0	0	0
	0	0	0	0	0	0.1	0	0	0	0	0	0
	0	0	0	0	0	0	0	0	0.1	0	0	0
	0	0	0	0.3	0.6	0	0	0	0.1	0	0	0
	0	0	0	0	0	0	0	0	0	0	0	0
	0	0	0	0.3	0.6	0	0	0	0.1	0	0	0
	0	0	0	0	0	0	0	0	0.1	0	0	0
	0	0	0.1	0	0	0	0	0	0.1	0	0	0
	0	0	0.1	0	0	0.1	0	0	0	0	0	0
	0	0	0	0	0	0	0	0	0	0	0	0
	0	0	0.1	0	0	0	0	0	0	0	0	0
	0	0	0.1	0	0	0.1	0	0	0	0	0	0
	0	0	0.1	0	0	0	0	0	0	0	0	0
	0	0	0.1	0.7	1.1	0.1	0	0	0.1	0	0	0
	0	0	0.1	0	0	0	0	0	0.1	0	0	0
	0	0	0.1	0	0	0	0	0	0.1	0	0	0
	0	0	0.1	0	0	0	0	0	0	0	0	0
	0	0	0.1	0	0	0	0	0	0	0	0	0
	0	0	0	0	0	0	0	0	0.1	0	0	0
	0	0	0.1	0	0	0	0	0	0.1	0	0	0
	0	0	0.1	0.3	0.6	0	0	0.1	0.1	0	0	0
	0	0	0.1	0	0	0	0	0	0	0	0	0
	0	0	0.1	0	0	0	0	0	0.1	0	0	0
	0	0	0.1	0	0	0.1	0	0	0.1	0	0	0
	0.1	0.6	0.1	0	0	0.1	0	0	0.1	0	0	0
	0	0	0	0	0	0.1	0	0	0.1	0	0	0
	0	0	0.1	0	0	0	0	0	0	0	0	0
	0	0	0.1	0	0	0	0	0	0	0	0	0
	0	0	0.1	0	0.1	0.1	0	0	0.1	0	0	0
	0	0	0.1	0	0	0	0	0	0	0	0	0
	0	0	0.1	0	0	0.1	0	0	0	0.1	0.3	0
	0	0	0	0.1	0.2	0.1	0	0	0	0	0	0
	0	0	0.1	0	0	0.1	0	0	0	0	0	0.1
	0	0	0	0	0	0	0	0	0.1	0	0	0
	0	0	0.1	0	0	0	0	0	0	0	0	0
	0	0	0.1	0	0	0	0	0	0.1	0	0	0
	0	0	0.1	0	0	0	0	0	0	0	0	0
	0	0	0.1	0.4	0.6	0.1	0	0	0.1	0	0	0
	0	0	0.1	0.2	0.5	0.1	0	0	0	0	0	0
	0	0	0.1	0	0	0	0	0	0.1	0	0	0
	0	0	0.1	0	0	0.1	0	0	0	0	0	0
	0	0	0.1	0	0	0.1	0.4	0.5	0.1	0	0	0
	0	0	0	0	0	0.1	0	0	0.1	0	0	0.1
	0	0	0.1	0	0	0.1	0	0	0	0	0	0
	0	0	0.1	0	0	0.1	0	0	0	0	0	0
	0	0	0.1	0	0	0	0	0	0.1	0	0	0
	0	0	0.1	0	0	0.1	0	0	0.1	0	0	0
	0	0	0	0	0	0	0	0	0	0	0	0
	0	0	0.1	0	0	0.1	0	0	0	0	0	0
	0	0	0	0	0	0	0	0	0.1	0	0	0
	0	0	0	0	0	0	0	0	0	0	0	0
	0	0	0.1	0	0	0	0	0	0.1	0	0	0
	0	0	0.1	0	0	0	0	0	0	0	0	0
	0	0	0.1	0	0	0	0	0	0.1	0	0	0
	0	0	0.1	0	0	0	0	0	0.1	0	0	0
	0	0	0.1	0	0	0	0	0	0.1	0	0	0
	0	0	0.1	0	0	0	0	0	0.1	0	0	0
	0.4	0.5	0.1	0	0	0.1	0	0	0	0	0	0
	0	0	0	0	0	0	0	0	0.1	0	0	0
	0	0	0.1	0	0	0.1	0	0	0	0	0	0
	0	0	0.1	0	0	0	0	0	0.1	0	0	0
	0	0	0.1	0	0	0	0	0	0	0	0	0
	0	0	0.1	0	0	0	0	0	0	0	0	0
	0	0	0.1	0	0	0	0	0	0	0	0	0
	0	0	0.1	0	0	0	0	0	0	0	0	0
	0	0	0.1	0	0	0	0	0	0	0	0	0
	0	0	0.1	0	0	0	0	0	0	0	0	0
	0	0	0.1	0	0	0	0.2	0.5	0	0	0	0
	0	0	0.1	0	0	0	0	0	0	0	0	0
	0	0.1	0.1	0	0	0	0	0	0	0	0	0
	0	0	0.1	0	0	0	0	0	0	0	0	0
	0	0	0.1	0	0	0.1	0	0	0	0	0.1	0
	0	0	0	0	0	0.1	0	0	0	0	0	0
	0	0	0.1	0	0	0.1	0	0	0.1	0	0	0
	0	0	0.1	0	0	0	0	0	0	0	0	0
	0	0	0.1	0	0	0	0	0.1	0.1	0	0	0
	0	0	0.1	0	0	0.1	0	0	0	0	0	0
	0	0.1	0.1	0	0	0	0	0	0.1	0	0	0
	0	0	0.1	0	0	0.1	0	0	0.1	0	0	0
	0	0	0.1	0	0	0	0	0	0	0	0	0
	0	0	0.1	0	0	0	0	0	0	0	0	0
	0	0	0.1	0	0	0	0	0	0	0	0	0
	0	0	0.1	0	0	0	0	0	0.1	0	0	0
	0	0	0	0	0	0.1	0	0	0.1	0	0	0
	0	0	0	0	0	0	0	0	0	0	0	0
	0	0	0	0	0	0	0	0	0	0	0	0
	0	0	0.1	0	0	0	0	0	0.1	0	0	0
	0	0	0	0	0	0.1	0	0	0.1	0	0	0
	0	0	0.1	0	0	0.1	0	0	0.1	0	0	0
	0	0	0.1	0	0	0	0	0	0	0	0	0
	0	0	0.1	0	0	0.1	0	0	0	0	0	0
	0	0	0.1	0	0	0.1	0	0	0	0	0	0
	0	0	0.1	0	0	0.1	0	0	0	0	0	0
	0	0	0.1	0	0	0.1	0	0	0	0	0	0
	0	0	0.1	0	0	0.1	0	0	0	0	0	0
	0	0	0.1	0	0	0	0	0	0	0	0	0
	0	0	0.1	0	0	0.1	0	0	0.1	0	0	0
	0	0	0.1	0	0	0.1	0	0	0	0	0	0
	0	0	0.1	0	0	0	0	0	0.1	0	0	0
	0	0	0.1	0	0	0	0	0	0.1	0	0	0
	0	0	0.1	0	0	0.1	0	0	0	0	0	0
	0	0	0.1	0	0	0	0	0	0	0	0	0
	0	0	0	0	0	0	0	0	0	0	0	0
	0	0	0	0	0	0.1	0	0	0	0	0	0
	0	0	0.1	0	0	0	0	0	0.1	0	0	0
	0	0.1	0.1	0	0	0.1	0	0	0	0	0	0
	0	0	0.1	0	0	0.1	0	0	0	0	0	0
	0	0	0.1	0	0	0.1	0	0	0.1	0	0	0
	0	0	0.1	0	0.1	0.1	0	0	0	0	0	0
	0	0	0.1	0	0	0.1	0	0.1	0.1	0	0	0
	0	0	0	0	0	0.1	0	0	0	0	0	0
	0	0	0	0	0	0	0	0	0.1	0	0	0
	0	0	0	0	0	0	0	0	0	0	0	0
	0	0	0.1	0	0	0.1	0	0	0.1	0	0	0
	0	0	0.1	0.3	0.6	0.1	0	0	0.1	0	0	0
	0	0	0.1	0	0	0	0	0	0.1	0	0	0
	0	0	0.1	0	0	0	0	0	0	0	0	0
	0	0	0.1	0	0	0	0	0	0.1	0	0	0
	0	0	0.1	0	0	0.1	0	0	0	0	0	0
	0	0	0.1	0	0	0	0	0	0.1	0	0	0
	0	0	0.1	0	0	0.1	0	0	0.1	0	0	0
	0	0	0.1	0	0	0	0	0	0	0	0	0
	0	0	0.1	0	0	0.1	0	0	0	0	0	0
	0	0	0.1	0	0	0	0	0	0.1	0	0	0
	0	0	0.1	0	0	0	0	0	0.1	0	0	0
	0	0	0.1	0	0	0	0	0	0.1	0	0	0
	0	0	0.1	0	0	0.1	0	0	0	0	0	0
	0	0	0.1	0	0	0	0	0	0	0	0	0
	0	0	0.1	0	0	0	0	0	0.1	0	0	0
	0	0	0.1	0	0	0.1	0	0	0	0	0	0
	0	0	0.1	0	0	0.1	0	0	0	0	0	0
	0	0	0.1	0	0	0.1	0	0	0	0	0	0
	0	0	0.1	0	0	0.1	0	0	0	0	0	0
	0	0	0.1	0	0	0.1	0	0.3	0.1	0	0	0
	0	0	0.1	0	0	0	0	0	0	0	0	0
	0	0	0.1	0	0	0.1	0	0	0	0	0	0
	0	0	0.1	0	0	0.1	0	0	0.1	0	0	0
	0	0	0.1	0	0	0.1	0	0	0	0	0	0
	0	0	0.1	0	0	0	0	0	0	0	0	0
	0	0	0.1	0	0	0.1	0	0	0.1	0	0	0
	0	0	0.2	0	0	0	0	0	0.1	0	0	0
	0	0	0.1	0	0	0	0	0	0.1	0	0	0
	0	0	0.1	0	0	0.1	0	0	0.1	0	0	0
	0	0	0.1	0	0	0	0	0	0	0	0	0
	0	0	0.1	0	0	0	0	0	0	0	0	0
	0	0	0.1	0	0	0.1	0	0	0	0	0	0
	0	0	0.1	0	0	0	0	0	0.1	0	0	0
	0	0	0.1	0	0	0.1	0	0	0	0	0	0
	0	0	0.1	0	0	0.1	0	0	0.2	0	0	0
	0	0	0.1	0	0	0.1	0	0	0	0	0	0
	0	0	0.1	0	0	0	0	0	0.1	0	0	0
	0	0	0.1	0	0	0	0	0	0.1	0	0	0
	0	0	0.1	0	0	0	0	0	0.1	0	0	0
	0	0	0.1	0	0	0	0	0	0.1	0	0	0
	0	0	0.1	0.3	0.6	0	0	0	0.1	0	0	0
	0	0	0.1	0	0	0	0	0	0	0	0	0
	0	0	0.1	0	0	0	0	0	0	0	0	0.1
	0	0	0.1	0	0	0.1	0	0	0.1	0	0	0
	0	0	0.1	0	0	0	0	0	0	0	0	0
	0	0	0.1	0	0	0.1	0	0	0.1	0	0	0
	0	0	0.1	0	0	0	0	0	0.1	0	0	0
	0	0	0.1	0	0	0	0	0	0	0	0	0
	0	0	0	0.1	0.2	0.1	0	0	0.1	0	0	0
	0	0	0.1	0	0	0	0	0	0	0	0	0
	0	0	0.1	0	0	0	0	0	0	0	0	0
	0	0	0.1	0	0	0	0	0	0	0	0	0
	0	0	0.1	0	0	0	0	0	0	0	0	0
	0	0	0	0	0	0.1	0	0	0	0	0	0
	0	0	0.1	0	0	0.1	0	0	0.1	0	0	0
	0	0	0.1	0	0	0.1	0	0	0	0	0	0
	0	0	0.1	0	0	0.1	0	0	0.1	0	0	0
	0	0	0.1	0	0	0.1	0	0	0.1	0	0	0
	0	0	0.1	0	0	0	0	0	0	0	0	0.1
	0	0	0.1	0	0	0.1	0	0	0	0	0	0
	0	0	0.1	0	0.3	0.1	0	0	0	0	0	0
	0	0	0.1	0	0	0	0	0	0	0	0	0
	0	0	0.1	0	0	0.1	0	0	0.1	0	0	0
	0	0	0.1	0	0	0.1	0	0	0.1	0	0	0
	0	0	0.1	0	0	0	0	0	0.1	0	0	0
	0	0	0.1	0	0	0.1	0	0	0.1	0	0	0
	0	0	0.1	0	0	0	0	0	0	0	0	0
	0	0	0.1	0	0	0	0	0	0	0	0	0
	0	0	0	0	0	0.1	0	0	0	0	0	0
	0	0	0.1	0	0	0.1	0	0	0	0	0	0
	0	0	0.1	0	0	0.1	0	0	0.1	0	0	0
	0.3	0.6	0.1	0	0	0	0	0	0	0	0	0
	0	0	0.1	0	0	0	0	0	0	0	0	0
	0	0	0.1	0	0	0	0	0	0	0	0	0
	0	0	0.1	0	0	0	0	0	0.1	0	0	0
	0	0	0.1	0	0	0	0	0	0	0	0	0
	0	0	0.1	0	0	0.1	0	0	0	0	0	0
	0	0	0.1	0	0	0	0	0	0	0	0	0
	0	0	0.1	0	0	0.1	0	0	0	0	0	0
	0	0	0.1	0	0	0.1	0	0.1	0	0	0	0
	0	0	0.1	0	0	0.1	0	0	0.1	0	0	0
	0	0	0.1	0	0	0.1	0	0	0.1	0	0	0
	0	0	0.1	0	0	0	0	0	0.1	0	0	0
	0	0	0.1	0	0	0	0	0	0.1	0	0	0
	0	0	0.1	0	0	0	0	0	0	0	0	0
	0	0	0.1	0	0.1	0.1	0	0	0.1	0	0	0
	0	0	0.1	0	0	0.1	0	0	0.1	0	0	0
	0	0	0.1	0	0	0	0	0	0	0	0	0
	0	0	0.1	0	0	0	0	0	0.1	0	0	0
	0	0	0.1	0	0	0	0	0	0	0	0	0
	0	0	0.1	0	0	0	0	0	0	0	0	0
	0	0	0.1	0	0	0	0	0	0.1	0	0	0
	0	0	0.1	0	0	0	0	0	0	0	0	0
	0	0	0.1	0	0	0.1	0	0	0	0	0	0
	0	0	0.1	0	0	0	0	0	0	0	0	0
	0	0	0.1	0	0	0	0	0	0	0	0	0
	0	0	0.1	0	0	0	0	0	0	0	0	0
	0	0	0.1	0	0	0.1	0	0	0	0	0	0
	0	0	0.1	0	0	0.1	0	0	0.1	0	0	0
	0	0	0.1	0	0	0	0	0	0	0	0	0
	0	0	0.1	0	0	0.1	0	0	0.1	0	0	0.1
	0	0	0.1	0	0	0.1	0	0	0	0	0	0
	0	0	0.1	0	0	0.1	0	0	0	0	0	0
	0	0	0.1	0	0	0	0	0	0.1	0	0	0
	0	0	0.1	0	0	0	0	0	0	0	0	0
	0	0	0.1	0	0	0.1	0	0	0.1	0	0	0
	0	0	0.1	0.4	0.5	0.1	0	0	0	0	0	0
	0	0	0.1	0	0	0	0	0	0	0	0	0
	0	0	0.1	0	0	0.1	0	0	0	0	0	0
	0	0	0	0	0	0.1	0	0	0	0	0	0
	0	0	0.1	0	0	0.1	0	0	0.1	0	0	0
	0	0	0.1	0	0	0.1	0	0	0	0	0	0
	0	0	0.1	0	0	0	0	0	0	0	0	0
	0	0	0.1	0	0	0.1	0	0	0.1	0	0	0
	0	0	0.1	0	0	0.1	0	0	0	0	0	0
	0	0	0.1	0	0	0.1	0	0	0	0	0	0
	0	0	0.1	0	0	0	0	0	0.1	0	0	0
	0	0	0.1	0	0	0	0	0	0	0	0	0
	0	0	0.1	0	0	0.1	0	0	0.1	0	0	0
	0	0	0.1	0	0	0	0	0	0	0	0	0
	0	0	0.1	0	0	0	0	0	0	0	0	0
	0	0	0.1	0	0	0	0	0	0	0	0	0
	0	0	0.1	0	0	0	0	0	0.1	0	0	0
	0	0	0.1	0	0	0	0	0	0.1	0	0	0
	0	0	0.1	0.3	0.6	0	0	0	0.1	0	0	0
	0	0	0.1	0	0	0	0	0	0	0	0	0
	0	0	0	0	0	0.1	0	0	0.1	0	0	0
	0	0	0.1	0	0.1	0.1	0	0	0.1	0	0	0
	0	0	0.1	0	0	0	0	0	0.1	0	0	0
	0	0	0.1	0	0	0	0	0	0.1	0	0	0
	0	0	0.1	0	0	0.1	0	0	0	0	0	0
	0	0	0.1	0	0	0	0	0	0	0	0	0
	0	0	0.1	0	0	0	0	0	0	0	0	0
	0	0	0.1	0	0	0.1	0	0	0	0	0	0
	0	0	0.1	0	0	0.1	0	0	0.1	0	0	0
	0	0	0.2	0	0	0	0	0	0	0	0	0
	0	0	0.1	0	0	0	0	0	0	0	0	0
	0	0	0.1	0	0	0.1	0	0	0	0	0	0
	0	0	0.1	0	0	0.1	0	0	0.1	0	0	0
	0	0	0.1	0	0	0	0	0	0	0	0	0
	0	0	0.1	0	0	0.1	0	0	0	0	0	0
	0	0	0.1	0	0	0.1	0	0	0	0	0	0
	0	0	0.1	0	0	0.1	0	0	0	0	0	0
	0	0	0.1	0	0	0.1	0	0	0	0	0	0
	0	0	0.1	0	0	0.1	0	0	0	0	0	0
	0	0	0.2	0	0	0	0	0	0	0	0	0.1
	0	0	0.1	0	0	0	0	0	0	0	0	0
	0	0	0.1	0	0	0.1	0	0	0	0	0	0
	0	0	0.1	0	0	0.1	0	0	0.1	0	0	0
	0	0	0.1	0	0	0	0	0	0.1	0	0	0
	0	0	0.1	0	0	0.1	0	0	0	0	0	0
	0	0	0.1	0	0	0.1	0	0	0.1	0	0	0
	0	0	0.1	0	0	0	0	0	0.1	0	0	0
	0	0	0.1	0	0	0	0	0	0	0	0	0
	0	0	0.1	0	0	0.1	0	0	0.1	0	0	0
	0	0	0.1	0	0	0	0	0	0	0	0	0
	0	0	0.1	0	0	0.1	0	0	0	0	0	0
	0	0	0.1	0	0.2	0.1	0	0	0	0	0	0
	0	0	0.1	0	0	0	0	0	0	0	0	0
	0	0	0.1	0	0	0.1	0	0	0	0	0	0
	0	0	0.1	0	0	0.1	0	0	0	0	0	0
	0	0	0	0	0	0.1	0	0	0.1	0	0	0
	0	0	0.1	0	0	0	0	0	0.1	0	0	0
	0	0	0.1	0	0	0.1	0	0	0.1	0	0	0
	0	0	0.1	0	0	0	0	0	0.1	0	0	0
	0	0	0.1	0	0	0.1	0	0	0	0	0	0
	0	0	0.2	0	0	0	0	0	0	0	0	0
	0	0	0.1	0	0	0	0	0	0.1	0	0	0
	0	0	0.1	0	0	0	0	0	0.1	0	0	0
	0	0	0.1	0	0	0	0	0	0	0	0	0
	0	0	0.1	0	0	0.1	0	0	0.1	0	0	0
	0	0	0.1	0	0	0	0	0	0	0	0	0
	0	0	0.1	0	0	0.1	0	0	0	0	0	0
	0	0	0.1	0	0	0.1	0	0	0.1	0	0	0
	0	0	0.1	0	0	0.1	0	0	0	0	0	0
	0	0	0.1	0	0	0.1	0	0	0.1	0	0	0
	0	0	0.1	0	0	0	0	0	0	0	0	0
	0	0	0.1	0	0	0.1	0	0	0.1	0	0	0
	0	0	0.1	0	0	0.1	0	0	0	0	0	0
	0	0	0.1	0	0	0	0	0	0.1	0	0	0
	0	0	0.1	0	0	0	0	0	0	0	0	0
	0	0	0.1	0	0	0	0	0	0.1	0	0	0
	0	0	0.1	0	0	0.1	0	0	0	0	0	0
	0	0	0.1	0	0	0.1	0	0	0.1	0	0	0
	0	0	0.1	0	0	0.1	0	0	0	0	0	0
	0	0	0.1	0	0	0	0	0	0	0	0	0
	0	0	0.1	0	0	0.1	0	0	0.1	0	0	0
	0	0	0.1	0	0	0.1	0	0	0	0	0	0
	0	0	0.1	0	0	0	0	0	0	0	0	0
	0	0	0.1	0	0	0.1	0	0	0	0	0	0
	0	0	0.1	0	0	0.1	0	0	0.1	0	0	0.1
	0	0	0	0	0	0	0	0	0	0	0	0
	0	0	0.1	0	0	0	0	0	0	0	0	0
	0.1	0.3	0.1	0.1	0	0.1	0	0	0	0	0	0
	0	0	0	0	0	0.1	0	0	0	0	0	0
	0	0	0.1	0	0	0.1	0	0	0	0	0	0
	0	0	0.1	0	0	0	0	0	0	0	0	0
	0	0	0.1	0	0	0.1	0	0	0	0	0	0
	0	0	0.1	0.4	0.5	0.1	0	0	0.1	0	0	0
	0	0	0.1	0	0	0.1	0	0	0	0	0	0
	0	0	0.1	0	0	0	0	0	0	0	0	0
	0	0	0.1	0	0	0.1	0	0	0.1	0	0	0
	0	0	0.1	0	0	0.1	0	0	0	0	0	0
	0	0	0.1	0	0	0	0	0	0	0	0	0
	0	0	0.1	0	0	0.1	0	0	0.1	0	0	0
	0	0	0.1	0	0	0.1	0	0	0.1	0	0	0
	0	0	0.1	0	0	0	0	0	0.1	0	0	0
	0	0	0.1	0	0	0	0.1	0.2	0.1	0	0	0
	0	0	0.1	0	0	0.1	0	0	0	0	0	0
	0	0	0.1	0	0	0.1	0	0	0.1	0	0	0
	0	0	0.1	0	0	0.1	0	0	0.1	0	0	0
	0	0	0	0	0	0	0	0	0.1	0	0	0
	0	0	0.1	0	0	0	0	0	0	0	0	0
	0	0	0.1	0	0	0	0	0	0.1	0	0	0
	0	0	0.1	0	0	0.1	0	0	0.1	0	0	0
	0	0	0	0	0	0	0	0	0.1	0	0	0
	0	0	0.1	0	0	0.1	0	0	0	0	0	0
	0	0	0.1	0	0	0	0	0	0.1	0	0	0
	0	0	0.1	0	0	0.1	0	0	0	0	0	0.1
	0	0	0.1	0	0	0.1	0	0	0	0	0	0
	0	0	0.1	0	0	0.1	0	0	0	0	0	0
	0	0	0.1	0	0	0.1	0	0	0.1	0	0	0
	0	0	0.1	0	0	0	0	0	0.1	0	0	0
	0	0	0.1	0	0	0	0	0	0	0	0	0
	0	0	0.1	0	0	0.1	0	0	0.1	0	0	0
	0	0	0.1	0	0	0	0	0	0.1	0	0	0
	0	0	0.1	0	0	0	0	0	0	0	0	0
	0	0	0.1	0	0	0	0	0	0.1	0	0	0
	0	0	0.1	0	0	0	0	0	0	0	0	0.1
	0	0	0.1	0	0	0	0	0	0	0	0	0
	0	0	0.1	0	0	0.1	0	0	0	0	0	0
	0	0	0.1	0	0	0	0	0	0.1	0	0	0.1
	0	0	0.1	0	0	0.1	0	0	0	0	0	0
	0	0	0.1	0	0	0.1	0	0	0.1	0	0	0
	0	0	0.1	0	0	0	0	0	0	0	0	0
	0	0	0.1	0	0	0	0	0	0	0	0	0
	0	0	0.1	0	0	0.1	0	0	0.1	0	0	0
	0	0	0.1	0	0	0.1	0	0	0.1	0	0	0
	0	0	0.1	0	0	0	0	0	0	0	0	0
	0	0	0.1	0	0	0	0	0	0.1	0	0	0
	0	0	0.1	0	0	0.1	0	0	0	0	0	0
	0	0	0.1	0	0	0.1	0	0	0.1	0	0	0
	0	0	0.1	0	0	0	0	0	0	0	0	0
	0	0	0.1	0	0	0.1	0	0	0	0	0	0
	0	0	0.1	0	0	0	0	0	0.1	0	0	0
	0	0	0.1	0	0.1	0.1	0	0	0	0	0	0
	0	0	0.1	0	0	0.1	0	0	0	0	0	0
	0	0	0.1	0	0	0	0	0	0	0	0	0
	0	0	0.1	0	0	0	0	0	0	0	0	0
	0	0	0.1	0	0	0.1	0	0	0	0	0	0
	0	0	0.1	0	0	0	0	0	0.1	0	0	0
	0	0	0.1	0	0	0	0	0	0	0	0	0
	0	0	0.1	0	0	0	0	0	0.1	0	0	0
	0	0	0.1	0	0	0	0	0	0	0	0	0
	0	0	0.1	0	0	0.1	0	0	0	0	0	0
	0	0	0.1	0	0	0.1	0	0	0.1	0	0	0
	0	0	0.1	0	0	0	0	0	0	0	0	0
	0	0	0.1	0	0	0.1	0	0	0	0	0	0
	0	0	0.1	0	0	0.1	0	0	0.1	0	0	0
	0	0	0.1	0	0	0.1	0	0	0	0	0	0
	0	0	0.1	0	0	0.1	0	0	0.1	0	0	0
	0	0	0.1	0	0	0	0	0	0.1	0	0	0
	0	0	0.1	0	0	0.1	0	0	0.1	0	0	0
	0	0	0.1	0	0	0	0	0	0	0	0	0
	0	0	0.1	0	0	0.1	0	0	0.1	0	0	0
	0	0	0.1	0	0.3	0.1	0	0	0	0	0	0
	0	0	0.1	0	0	0.1	0	0	0.1	0	0	0
	0	0	0.1	0	0	0	0	0	0	0	0	0
	0	0	0.1	0	0.1	0.1	0	0	0	0	0	0
	0	0	0.1	0	0	0	0	0	0	0	0	0
	0	0	0.1	0	0	0.1	0	0	0.1	0	0	0
	0	0	0.1	0	0	0	0	0	0.1	0	0	0
	0	0	0.1	0	0	0	0	0	0	0	0	0
	0	0	0.1	0	0	0.1	0	0	0	0	0	0
	0	0	0.1	0	0	0.1	0	0	0	0	0	0
	0	0	0.1	0	0	0.1	0	0	0.1	0	0	0
	0	0	0.1	0	0	0	0	0	0.1	0	0	0
	0	0	0.1	0	0	0.1	0	0	0	0	0	0
	0	0	0.1	0	0	0.1	0	0	0	0	0	0
	0	0	0.1	0	0	0	0	0	0	0	0	0
	0	0	0.1	0	0.1	0.1	0	0	0	0	0	0
	0	0	0.1	0	0	0.1	0	0	0	0	0	0
	0	0	0.1	0	0	0	0	0	0	0	0	0
	0	0	0.1	0	0	0.1	0	0	0	0	0	0
	0	0	0.1	0	0	0.1	0	0	0.1	0	0	0
	0	0	0.1	0	0	0.1	0	0	0.1	0	0	0
	0	0	0.1	0	0	0	0	0	0	0	0	0
	0	0	0.1	0	0	0	0	0	0	0	0	0
	0	0	0.1	0	0	0.1	0	0	0	0	0	0
	0	0	0.1	0	0	0	0	0	0	0	0	0
	0	0	0.1	0	0	0.1	0	0	0	0	0	0
	0	0	0.1	0	0	0.1	0	0	0	0	0	0
	0	0	0.1	0	0	0.1	0	0	0	0	0	0
	0	0	0.1	0	0	0	0	0	0	0	0	0
	0	0	0.1	0	0	0.1	0	0	0	0	0	0.1
	0	0	0.1	0	0	0	0	0	0.1	0	0	0
	0	0	0.1	0	0	0.1	0	0	0.1	0	0	0
	0	0	0.2	0	0	0	0	0	0	0	0	0
	0	0	0.1	0	0	0	0	0	0.1	0	0	0
	0	0	0.1	0	0	0	0	0	0.1	0	0	0.1
	0	0	0.1	0	0	0.1	0	0	0	0	0	0
	0	0	0.1	0	0	0.1	0	0	0	0	0	0
	0	0	0.1	0	0	0.1	0	0	0	0	0	0
	0	0	0.1	0	0	0	0	0	0.1	0	0	0
	0	0	0.1	0	0	0	0	0	0.1	0	0	0
	0	0	0.1	0	0	0.1	0	0	0	0	0	0
	0	0	0.2	0	0	0.1	0	0	0	0	0	0
	0	0	0.1	0	0	0.1	0	0	0	0	0	0
	0	0	0.1	0	0	0	0	0	0	0	0	0
	0	0	0.1	0	0	0	0	0	0.1	0	0	0
	0	0	0.1	0.1	0.6	0	0	0	0.1	0	0	0
	0	0	0.1	0	0	0.1	0	0	0.1	0	0	0
	0	0	0.1	0	0	0.1	0	0	0.1	0	0	0
	0	0	0.1	0	0	0	0	0	0	0	0	0
	0	0	0.1	0	0	0.1	0	0	0	0	0	0.1
	0	0	0.1	0	0	0.1	0	0	0	0	0	0
	0	0	0.1	0	0	0	0	0	0	0	0	0
	0	0	0.2	0	0	0.1	0	0	0	0	0	0
	0	0	0.1	0	0	0.1	0	0	0	0	0	0
	0	0	0.1	0.4	0.5	0.1	0	0	0.1	0	0	0
	0	0	0.1	0	0	0.1	0	0	0.1	0	0	0
	0	0	0.1	0	0	0	0	0	0	0	0	0
	0	0	0.1	0	0	0	0	0	0.1	0	0	0
	0	0	0.1	0	0	0.1	0	0	0	0	0	0
	0	0	0.1	0	0	0.1	0	0	0	0	0	0
	0	0	0.1	0	0	0.1	0	0	0	0	0	0
	0	0	0.1	0	0	0.1	0	0	0.1	0	0	0
	0	0	0.1	0	0	0.1	0	0	0	0	0	0
	0	0	0.1	0	0	0.1	0	0	0	0	0	0
	0	0	0.1	0	0	0.1	0	0	0	0	0	0
	0	0	0.1	0	0	0	0	0	0	0	0	0
	0	0	0.1	0	0	0	0	0	0.1	0	0	0
	0	0	0.1	0	0	0.1	0	0	0	0	0	0
	0	0	0.1	0	0	0.1	0	0	0	0	0	0
	0	0	0.1	0	0	0.1	0	0	0	0	0	0
	0	0	0.1	0	0	0	0	0	0	0	0	0
	0	0	0.1	0	0	0.1	0	0	0	0	0	0
	0	0	0.1	0.2	0.5	0.1	0	0	0	0	0	0
	0	0	0.1	0	0	0.1	0	0	0	0	0	0
	0	0	0.1	0	0	0	0	0	0	0	0	0
	0	0	0.1	0	0	0.1	0	0	0	0	0	0
	0	0	0.1	0	0	0.1	0	0	0.1	0	0	0
	0	0	0.1	0	0	0	0	0	0.1	0	0	0
	0	0	0.1	0	0	0.1	0	0	0	0	0	0
	0	0	0.1	0	0	0.1	0	0	0	0	0	0
	0	0	0.1	0	0	0.1	0	0	0.1	0	0	0
	0	0	0.1	0	0	0	0.2	0.5	0.1	0	0	0
	0	0	0.2	0	0	0.1	0	0	0.1	0	0	0
	0	0	0.1	0	0	0.1	0	0	0.1	0	0	0
	0	0	0.1	0	0	0	0	0	0.1	0	0	0
	0	0	0.1	0	0	0.1	0	0	0.1	0	0	0
	0	0	0.1	0	0	0.1	0	0	0.1	0	0	0
	0	0	0.1	0	0	0.1	0	0	0	0	0	0
	0	0	0.1	0	0	0.1	0	0	0	0	0	0
	0	0	0.2	0	0	0.1	0	0	0.1	0	0	0
	0	0	0.2	0	0	0.1	0	0	0.1	0	0	0
	0	0	0.1	0	0	0.1	0	0	0	0	0	0
	0	0	0.1	0	0	0.1	0	0	0.1	0	0	0
	0	0	0.1	0	0	0	0	0	0	0	0	0
	0	0	0.1	0	0	0.1	0	0	0	0	0	0
	0	0	0.2	0	0	0.1	0	0	0.1	0	0	0
	0	0	0.1	0	0	0	0	0	0	0	0	0
	0	0	0.1	0	0	0.1	0	0	0	0	0	0
	0	0	0.1	0	0	0	0	0	0.1	0	0	0
	0	0	0.1	0	0	0	0	0	0.1	0	0	0
	0	0	0.1	0	0	0.1	0	0	0	0	0	0
	0.1	0.6	0.1	0	0	0.1	0	0	0	0	0	0
	0	0	0.1	0	0	0	0	0	0	0	0	0
	0	0	0.1	0	0	0.1	0	0	0	0	0	0
	0	0	0.2	0	0	0	0	0	0	0	0	0
	0	0	0.1	0	0	0.1	0	0	0.1	0	0	0
	0	0	0.1	0	0	0.1	0	0	0	0	0	0
	0	0	0.1	0	0	0.1	0	0	0	0	0	0
	0	0	0.1	0	0	0	0	0.1	0.1	0	0	0
	0	0	0.1	0	0	0.1	0	0	0	0	0	0
	0	0	0.1	0	0	0	0	0	0.1	0	0	0
	0	0	0.1	0	0	0	0	0	0	0	0	0
	0	0	0.1	0	0	0.1	0	0	0.1	0	0	0
	0	0	0.1	0	0	0.1	0	0	0.1	0	0	0
	0	0	0.1	0	0	0.1	0	0	0	0	0	0
	0	0	0.1	0	0	0	0	0	0.1	0	0	0
	0	0	0.1	0	0	0.1	0	0	0.1	0	0	0
	0	0	0.2	0	0	0	0	0	0	0	0	0
	0	0	0.1	0	0	0.1	0	0	0.1	0	0	0
	0	0	0.2	0	0	0.1	0	0	0.1	0	0	0
	0	0	0.2	0.4	0.5	0.1	0	0	0	0	0	0
	0	0	0.1	0	0	0.1	0	0	0.1	0	0	0
	0	0	0.1	0	0	0.1	0	0	0.1	0	0	0
	0	0	0.1	0	0	0.1	0	0	0.1	0	0	0
	0	0	0.1	0	0	0	0	0	0.1	0	0	0
	0	0	0.1	0	0	0.1	0	0	0	0	0	0
	0	0	0.1	0	0	0	0	0	0	0	0	0
	0	0	0.1	0	0	0.1	0	0	0.1	0	0	0
	0	0	0.1	0	0	0	0	0	0.1	0	0	0
	0	0	0.1	0	0	0	0	0	0.1	0	0	0
	0	0	0.2	0.1	0.5	0.1	0	0	0.1	0	0	0
	0	0	0.1	0	0	0.1	0	0	0.1	0	0	0
	0	0	0.1	0	0	0.1	0	0	0.1	0	0	0.1
	0	0	0.1	0	0	0	0	0	0	0	0	0
	0	0	0.1	0	0	0	0	0	0.1	0	0	0
	0	0	0.1	0	0	0.1	0	0.1	0.1	0	0	0
	0	0	0.2	0	0	0.1	0	0	0.1	0	0	0
	0	0	0.1	0	0.3	0.1	0	0	0	0	0	0
	0	0	0.1	0	0	0.1	0	0	0	0	0	0
	0	0	0.1	0.8	1.1	0.1	0	0	0.1	0	0	0
	0	0	0.1	0	0	0	0	0	0.1	0	0	0
	0	0	0.1	0	0	0.1	0	0	0.1	0	0	0
	0	0	0.2	0	0	0.1	0	0	0.1	0	0	0
	0	0	0.1	0	0.1	0.1	0	0	0	0	0	0
	0	0	0.1	0	0	0	0	0	0	0	0	0.1
	0	0	0.1	0	0	0.1	0	0	0.1	0	0	0
	0	0	0.1	0	0.1	0.1	0	0	0.1	0	0	0
	0	0	0.1	0	0	0.1	0	0	0	0	0	0
	0	0	0.2	0	0	0.1	0	0	0	0	0	0
	0	0	0.1	0	0	0.1	0	0	0.1	0	0	0
	0	0	0.1	0	0	0.1	0	0	0	0	0	0
	0	0	0.1	0	0	0	0	0	0.1	0	0	0
	0	0	0.1	0	0	0.1	0	0	0	0	0	0
	0	0	0.1	0	0	0	0	0	0.1	0	0.2	0
	0	0	0.2	0	0	0.1	0	0	0	0	0	0
	0	0	0.1	0.3	0.6	0.1	0	0	0	0	0	0
	0	0	0.1	0	0	0.1	0	0	0	0	0	0
	0	0	0.1	0	0	0	0	0	0	0	0	0
	0	0	0.1	0	0	0.1	0	0	0	0	0	0
	0	0	0.2	0	0	0.1	0	0	0	0	0	0
	0	0	0.1	0	0	0.1	0	0	0	0	0	0
	0	0	0.1	0	0	0.1	0	0	0	0	0	0
	0	0	0.1	0	0	0.1	0	0	0.1	0	0	0
	0	0	0.1	0	0	0	0	0	0	0	0	0
	0	0	0.1	0	0	0.1	0	0	0.1	0	0	0
	0	0	0.1	0	0	0.1	0	0	0	0	0	0
	0	0	0.1	0	0	0.1	0	0	0	0	0	0
	0	0	0.1	0.1	0.5	0.1	0	0	0.1	0	0	0
	0	0	0.1	0	0	0.1	0	0	0.1	0	0	0
	0	0	0.1	0	0	0.1	0	0	0	0	0	0
	0	0	0.1	0	0	0.1	0	0	0	0	0	0
	0	0	0.1	0	0	0.1	0	0	0.1	0	0	0
	0	0	0.1	0	0	0	0	0	0	0	0	0
	0	0	0.1	0	0	0.1	0	0	0.1	0	0	0
	0	0	0.1	0	0	0.1	0	0	0.1	0	0	0
	0	0	0.2	0	0	0.1	0	0	0	0	0	0
	0	0	0.1	0	0	0.1	0	0	0.1	0	0	0
	0	0	0.1	0	0	0.1	0	0	0	0	0	0
	0	0	0.1	0	0	0	0	0	0	0	0	0
	0	0	0.1	0	0	0.1	0	0	0.1	0	0	0
	0	0	0.1	0	0	0.1	0	0	0.1	0	0	0
	0	0	0.1	0	0	0.1	0	0	0	0	0	0
	0	0	0.1	0	0	0.1	0	0	0.1	0	0	0
	0	0	0.1	0	0	0.1	0	0	0.1	0	0	0
	0	0	0.1	0	0	0	0	0	0.1	0	0	0
	0	0	0.1	0	0	0	0	0	0.1	0	0	0
	0	0	0.1	0	0	0	0	0	0.1	0	0	0
	0	0	0.2	0	0	0	0	0	0	0	0	0
	0	0	0.1	0	0	0.1	0	0	0	0	0	0
	0	0	0.1	0	0	0.1	0	0	0	0	0	0
	0	0	0.1	0	0	0.1	0	0	0	0	0	0
	0	0	0.1	0	0	0.1	0	0	0.1	0	0	0
	0	0	0.1	0.1	0.3	0	0	0	0.1	0	0	0
	0	0	0.1	0	0	0.1	0	0	0	0	0	0
	0	0	0.1	0	0	0.1	0	0	0.1	0	0	0
	0	0	0.1	0	0	0.1	0	0	0	0	0	0
	0	0	0.1	0	0	0.1	0	0	0.1	0	0	0
	0	0	0.1	0	0	0.1	0	0	0.1	0	0	0
	0	0	0.2	0	0	0	0	0	0.1	0	0	0
	0	0	0.1	0	0	0.1	0	0	0	0	0	0
	0	0	0.2	0	0	0.1	0	0	0	0	0	0
	0	0	0.1	0	0	0.1	0	0	0.1	0	0	0.1
	0	0	0.1	0	0	0.1	0	0	0	0	0	0
	0	0	0.2	0	0	0.1	0	0	0	0	0	0
	0	0	0.1	0	0	0.1	0	0	0.1	0	0	0
	0	0	0.1	0	0	0	0	0	0	0	0	0
	0	0	0.2	0	0	0.1	0	0	0	0	0	0
	0	0	0.1	0	0	0.1	0	0	0	0	0	0
	0	0	0.1	0	0	0.1	0	0	0.1	0	0	0
	0	0	0.2	0	0	0	0	0	0	0	0	0
	0	0	0.2	0	0	0.1	0	0	0	0	0	0
	0	0	0.1	0	0	0.1	0	0	0.1	0	0	0
	0	0	0.1	0	0	0.1	0	0	0.1	0	0	0
	0	0	0.1	0	0	0	0	0	0.1	0	0	0
	0	0	0.1	0	0	0.1	0	0	0	0	0	0
	0	0	0.1	0	0	0.1	0	0	0.1	0	0	0
	0	0	0.1	0	0	0.1	0	0	0.1	0	0	0
	0	0	0.1	0	0	0.1	0	0	0.1	0	0	0
	0	0	0.1	0	0	0.1	0	0	0.1	0	0	0
	0	0	0.1	0	0	0	0	0	0	0	0	0
	0	0	0.1	0	0	0.1	0	0	0.1	0	0	0
	0	0	0.1	0	0	0.1	0	0	0.1	0	0	0.1
	0	0.1	0.2	0	0	0	0	0	0.1	0	0	0
	0	0	0.1	0	0	0.1	0	0	0.1	0	0	0
	0	0	0.1	0	0	0	0	0	0.1	0	0	0
	0	0	0.2	0	0	0.1	0	0	0	0	0	0.1
	0	0	0.1	0	0	0.1	0	0	0	0	0	0
	0	0	0.1	0	0	0.1	0	0	0.1	0	0	0
	0	0.1	0.2	0	0	0	0	0	0.1	0	0	0
	0	0	0.1	0	0	0	0	0	0.1	0	0	0
	0	0	0.1	0	0	0.1	0	0.1	0	0	0	0
	0	0	0.1	0	0	0.1	0	0	0.1	0	0	0
	0	0	0.1	0	0	0.1	0	0	0	0	0	0
	0	0	0.1	0	0	0.1	0	0	0	0	0	0
	0	0	0.1	0	0	0.1	0	0	0	0	0	0
	0	0	0.1	0	0	0	0	0	0	0	0	0
	0	0	0.1	0	0	0.1	0	0	0	0	0	0
	0	0	0.2	0	0	0.1	0	0	0	0	0	0
	0	0	0.1	0	0	0.1	0	0	0	0	0	0
	0	0	0.1	0	0	0.1	0	0	0	0	0	0
	0	0	0.1	0	0	0.1	0	0	0	0	0	0
	0	0	0.1	0	0	0	0	0	0	0	0	0
	0	0	0.2	0	0	0.1	0	0	0	0	0	0
	0	0	0.1	0	0	0	0	0	0.1	0	0	0
	0	0	0.1	0	0	0.1	0	0	0.1	0	0	0
	0	0	0.1	0	0	0.1	0	0	0	0	0	0
	0	0	0.2	0	0.1	0.1	0	0	0.1	0	0	0
	0	0	0.1	0	0	0	0	0	0.1	0	0	0
	0	0	0.1	0	0	0.1	0	0	0	0	0	0
	0	0	0.1	0	0	0	0	0	0	0	0	0
	0	0	0.1	0	0	0	0	0	0.1	0	0	0
	0	0	0.2	0	0	0.1	0	0	0	0	0	0
	0	0	0.2	0	0	0.1	0	0	0	0	0	0
	0	0	0.1	0	0	0	0	0	0	0	0	0
	0	0	0.1	0	0	0.1	0	0	0.1	0	0	0
	0	0	0.2	0	0	0	0	0	0	0	0	0
	0	0	0.1	0	0	0.1	0	0	0.1	0	0	0
	0	0	0.1	0	0	0	0	0	0	0	0	0
	0	0	0.1	0	0	0	0	0	0.1	0	0	0
	0	0	0.1	0	0	0.1	0	0	0	0	0	0
	0	0	0.1	0	0	0.1	0	0	0.1	0	0	0
	0	0	0.1	0	0	0	0	0	0.1	0	0	0
	0	0	0.2	0	0	0.1	0	0	0	0	0	0
	0	0	0.1	0	0	0.1	0	0	0	0	0	0
	0	0	0.1	0	0	0	0	0	0.1	0	0	0
	0	0	0.1	0	0	0.1	0	0	0	0	0	0
	0	0	0.1	0	0	0.1	0	0	0	0	0	0
[truncated: 551 more rows]

## Sheet: gravel
ug/m^3	4ms	1/8
PM	10	2.5	1	10	2.5	1	10	2.5	1	10	2.5	1
	0	0	0	0	0	0	0	0	0	0	0	0
	0	0	0	0.4	0.3	0.1	0	0	0	0	0	0
	0	0	0	0	0	0	0	0	0	0	0	0
	0	0	0	0	0	0	0	0	0	1.9	1.2	0
	0	0	0	0	0	0	0	0	0	0.2	0.2	0.1
	0.1	0.1	0.1	0	0	0	0.1	0.1	0.1	0	0	0
	0	0	0	0	0	0	0	0	0	0	0	0
	0	0	0	0	0	0	0	0	0	1.3	0.7	0.1
	0.1	0.1	0.1	0	0	0	0.3	0.2	0.1	2.9	1.4	0.1
	0	0	0	0.9	0.6	0	0.1	0.1	0.1	0.4	0.3	0
	0.1	0.1	0.1	0	0	0	0	0	0	0	0	0
	0.9	0.6	0.1	0	0	0	0.1	0.1	0.1	2	0.7	0.1
	0	0	0	0	0	0	0.2	0.2	0.1	0	0	0
	0.1	0.1	0.1	0	0	0	0	0	0	1	0.7	0.1
	0	0	0	0.5	0.4	0.1	0	0	0	0	0	0
	0.1	0.1	0.1	0	0	0	0.1	0.1	0.1	0	0	0
	1.1	0.6	0	0.1	0.1	0.1	0.1	0.1	0.1	0.4	0.3	0
	3.2	0.5	0.1	0	0	0	0	0	0	0	0	0
	0.1	0.1	0.1	0	0	0	0.1	0.1	0.1	0	0	0
	0	0	0	0.7	0.5	0	0.1	0.1	0.1	0	0	0
	0.4	0.3	0	0	0	0	0.9	0.6	0	0.1	0.1	0.1
	1	0.6	0.1	0.4	0.3	0	0.2	0.2	0.1	0.1	0.1	0.1
	0	0	0	0.9	0.6	0.1	0.1	0.1	0.1	0.1	0.1	0.1
	0.1	0.1	0.1	0	0	0	0.1	0.1	0.1	0	0	0
	0	0	0	0	0	0	0.1	0.1	0.1	0.9	0.6	0
	0	0	0	0	0	0	0.1	0.1	0.1	0	0	0
	0	0	0	0	0	0	0.1	0.1	0.1	0	0	0
	0	0	0	0.1	0.1	0.1	0.1	0.1	0.1	0.1	0.1	0.1
	0	0	0	0	0	0	0	0	0	0.1	0.1	0
	0.1	0.1	0.1	13.4	0.5	0	0.1	0.1	0.1	0	0	0
	0	0	0	0.1	0.1	0.1	0.1	0.1	0.1	0.1	0.1	0.1
	0	0	0	0	0	0	0.1	0.1	0.1	0.1	0.1	0.1
	0.1	0.1	0.1	0	0	0	0.1	0.1	0.1	0.7	0.5	0
	0	0	0	0	0	0	0.4	0.4	0.1	2.6	1.7	0.1
	0	0	0	0	0	0	0	0	0	0	0	0
	0	0	0	0.1	0.1	0.1	0.1	0.1	0.1	0.1	0.1	0.1
	0.1	0.1	0.1	0	0	0	0.1	0.1	0.1	0	0	0
	0	0	0	0	0	0	0.1	0.1	0.1	0.1	0.1	0
	1	0.6	0.1	0.2	0.2	0.1	0.1	0.1	0.1	0	0	0
	0	0	0	0	0	0	0.1	0.1	0.1	0.1	0.1	0.1
	0	0	0	0.1	0.1	0.1	0.1	0.1	0.1	0	0	0
	0	0	0	0	0	0	0.1	0.1	0.1	0	0	0
	0	0	0	0	0	0	0.2	0.2	0.1	0	0	0
	0.1	0.1	0.1	0	0	0	0.1	0.1	0.1	0	0	0
	0	0	0	0	0	0	0.1	0.1	0.1	1.4	0.6	0
	0.1	0.1	0.1	0	0	0	0.1	0.1	0.1	0	0	0
	0	0	0	0	0	0	0.1	0.1	0.1	0	0	0
	0	0	0	1.4	0.6	0	0	0	0	0.1	0.1	0.1
	0.1	0.1	0.1	0	0	0	0	0	0	0	0	0
	0.9	0.6	0	0	0	0	0.1	0.1	0.1	0.9	0.6	0
	0.4	0.4	0.1	0	0	0	0	0	0	0	0	0
	0.4	0.4	0.1	0	0	0	0.1	0.1	0.1	0	0	0
	1.9	0.6	0.1	0	0	0	0.1	0.1	0.1	0.7	0.5	0
	0.1	0.1	0.1	0	0	0	0	0	0	0	0	0
	0	0	0	0	0	0	0.1	0.1	0.1	0	0	0
	0.1	0.1	0.1	0	0	0	0.1	0.1	0.1	0	0	0
	0.7	0.6	0.1	0	0	0	0.1	0.1	0.1	0	0	0
	0	0	0	0	0	0	0	0	0	0.1	0.1	0.1
	0	0	0	0	0	0	0.1	0.1	0.1	0	0	0
	0	0	0	0	0	0	0.1	0.1	0.1	0	0	0
	0.1	0.1	0.1	0	0	0	0.1	0.1	0.1	0	0	0
	0	0	0	0	0	0	0.1	0.1	0.1	0.7	0.5	0
	0.1	0.1	0.1	0	0	0	0.1	0.1	0.1	0.7	0.5	0
	0	0	0	0	0	0	0	0	0	0	0	0
	0.1	0.1	0.1	0	0	0	0	0	0	0	0	0
	0.7	0.5	0	0.1	0.1	0.1	0.1	0.1	0.1	0	0	0
	0	0	0	0	0	0	0.1	0.1	0.1	0	0	0
	0.1	0.1	0.1	0	0	0	0	0	0	0	0	0
	0	0	0	0.1	0.1	0.1	0.1	0.1	0.1	0	0	0
	0	0	0	0.1	0.1	0.1	0.1	0.1	0.1	0	0	0
	0	0	0	0	0	0	0.1	0.1	0.1	0	0	0
	0.1	0.1	0.1	0	0	0	0.1	0.1	0.1	0.1	0.1	0
	1.4	1	0	0.7	0.5	0	0.1	0.1	0.1	0.1	0.1	0.1
	0	0	0	0	0	0	0.1	0.1	0.1	1	0.6	0.1
	0	0	0	0.1	0.1	0.1	0.1	0.1	0.1	0.7	0.5	0
	0.1	0.1	0.1	0	0	0	0.1	0.1	0.1	0.7	0.5	0
	0	0	0	0	0	0	0	0	0	0	0	0
	0	0	0	0.1	0.1	0.1	0.1	0.1	0.1	0	0	0
	0	0	0	0	0	0	0.1	0.1	0.1	0.1	0.1	0.1
	0	0	0	0	0	0	0.1	0.1	0.1	0.1	0.1	0.1
	0	0	0	0	0	0	0.1	0.1	0.1	0	0	0
	0.1	0.1	0.1	0	0	0	0.1	0.1	0.1	0	0	0
	0.1	0.1	0.1	0	0	0	0	0	0	0	0	0
	0.4	0.3	0	0	0	0	0.1	0.1	0.1	0	0	0
	0.1	0.1	0.1	0.1	0.1	0.1	0.1	0.1	0.1	0	0	0
	0	0	0	0	0	0	0.1	0.1	0.1	0	0	0
	0	0	0	0	0	0	0.1	0.1	0.1	0	0	0
	0	0	0	0	0	0	0.1	0.1	0.1	0	0	0
	0	0	0	0.1	0.1	0.1	0.1	0.1	0.1	0	0	0
	0	0	0	0	0	0	0.1	0.1	0.1	0.7	0.5	0
	0	0	0	0	0	0	0.1	0.1	0.1	0	0	0
	0.1	0.1	0.1	0	0	0	0.1	0.1	0.1	0	0	0
	0	0	0	0.1	0.1	0.1	0.1	0.1	0.1	0.2	0.2	0
	0	0	0	0	0	0	0.1	0.1	0.1	0	0	0
	0	0	0	0.2	0.2	0.1	0.1	0.1	0.1	0.1	0.1	0.1
	0	0	0	0	0	0	0.1	0.1	0.1	0	0	0
	0	0	0	0.1	0.1	0.1	0.1	0.1	0.1	0	0	0
	0	0	0	0	0	0	0.1	0.1	0.1	0	0	0
	0	0	0	0	0	0	0.1	0.1	0.1	0	0	0
	0.1	0.1	0.1	0	0	0	0	0	0	0	0	0
	0	0	0	0	0	0	0.1	0.1	0.1	0	0	0
	0.1	0.1	0.1	0	0	0	0.1	0.1	0.1	0.1	0.1	0.1
	0	0	0	0	0	0	0.1	0.1	0.1	0	0	0
	0	0	0	0.1	0.1	0.1	0.1	0.1	0.1	0	0	0
	0	0	0	0	0	0	0.1	0.1	0.1	0	0	0
	0.1	0.1	0.1	0.7	0.6	0.1	0.1	0.1	0.1	0.1	0.1	0.1
	0.2	0.2	0.1	0	0	0	0.1	0.1	0.1	0	0	0
	0.4	0.4	0.1	0	0	0	0.1	0.1	0.1	0.2	0.2	0.1
	0	0	0	0	0	0	0.1	0.1	0.1	1	0.6	0.1
	0.1	0.1	0.1	0	0	0	0.1	0.1	0.1	0	0	0
	0	0	0	0.1	0.1	0.1	0.1	0.1	0.1	0	0	0
	0	0	0	0.4	0.3	0.1	0.5	0.4	0.1	0	0	0
	0	0	0	0	0	0	0.1	0.1	0.1	0	0	0
	0	0	0	0.2	0.2	0.1	0.2	0.2	0.2	0	0	0
	0.1	0.1	0.1	0	0	0	0	0	0	0	0	0
	0.1	0.1	0.1	0	0	0	0.1	0.1	0.1	0.1	0.1	0.1
	0	0	0	0	0	0	0.1	0.1	0.1	0	0	0
	0.9	0.6	0	0.1	0.1	0.1	0.1	0.1	0.1	0.1	0.1	0.1
	0.9	0.6	0	0.1	0.1	0.1	0.1	0.1	0.1	0.2	0.2	0.1
	0	0	0	0.1	0.1	0.1	0	0	0	0	0	0
	0.1	0.1	0.1	0	0	0	0.1	0.1	0.1	0	0	0
	0	0	0	0	0	0	0.1	0.1	0.1	0.1	0.1	0.1
	0	0	0	0	0	0	0.1	0.1	0.1	0	0	0
	0.1	0.1	0.1	0.1	0.1	0.1	0.1	0.1	0.1	0	0	0
	0	0	0	0.1	0.1	0	0.1	0.1	0.1	0	0	0
	0	0	0	0	0	0	0.1	0.1	0.1	1	0.6	0.1
	0	0	0	0.7	0.5	0	0.1	0.1	0.1	0.1	0.1	0.1
	0.1	0.1	0.1	0	0	0	0.1	0.1	0.1	0	0	0
	0	0	0	0	0	0	0	0	0	0	0	0
	0.1	0.1	0.1	0	0	0	0.1	0.1	0.1	0	0	0
	0	0	0	0	0	0	0.1	0.1	0.1	0	0	0
	0	0	0	0.1	0.1	0.1	0.1	0.1	0.1	0	0	0
	0	0	0	0	0	0	0.1	0.1	0.1	0	0	0
	0	0	0	0	0	0	0.1	0.1	0.1	0	0	0
	0.4	0.4	0.1	0	0	0	0.1	0.1	0.1	0	0	0
	0.1	0.1	0.1	0	0	0	0.1	0.1	0.1	0	0	0
	0.1	0.1	0.1	0	0	0	0.1	0.1	0.1	0	0	0
	0.1	0.1	0.1	0	0	0	0.1	0.1	0.1	0	0	0
	0	0	0	0	0	0	0.1	0.1	0.1	0	0	0
	0	0	0	0	0	0	0.1	0.1	0.1	0	0	0
	0.1	0.1	0.1	0	0	0	0.1	0.1	0.1	0	0	0
	0	0	0	0	0	0	0.1	0.1	0.1	0	0	0
	0.1	0.1	0.1	0	0	0	0.1	0.1	0.1	0	0	0
	0	0	0	0	0	0	0.1	0.1	0.1	0	0	0
	0	0	0	0	0	0	0.1	0.1	0.1	0	0	0
	0.1	0.1	0.1	0	0	0	0.1	0.1	0.1	0	0	0
	0	0	0	0	0	0	0.3	0.3	0.1	0.1	0.1	0.1
	0	0	0	0.1	0.1	0.1	0.1	0.1	0.1	0	0	0
	0	0	0	0	0	0	0.1	0.1	0.1	0.1	0.1	0.1
	0.1	0.1	0.1	0	0	0	0.1	0.1	0.1	0.1	0.1	0.1
	0	0	0	0	0	0	0.1	0.1	0.1	0	0	0
	0	0	0	0	0	0	0.1	0.1	0.1	1	0.6	0.1
	0	0	0	0	0	0	0.1	0.1	0.1	0	0	0
	0	0	0	0	0	0	0.1	0.1	0.1	0	0	0
	0	0	0	0	0	0	0.1	0.1	0.1	0	0	0
	0	0	0	0	0	0	0.1	0.1	0.1	0.1	0.1	0.1
	0	0	0	0.1	0.1	0.1	0.1	0.1	0.1	0	0	0
	0.1	0.1	0.1	0	0	0	0.1	0.1	0.1	0	0	0
	0	0	0	0	0	0	0.1	0.1	0.1	0.1	0.1	0.1
	0	0	0	0	0	0	0.1	0.1	0.1	0	0	0
	0	0	0	0	0	0	0.4	0.4	0.1	0	0	0
	0	0	0	0	0	0	0.1	0.1	0.1	0.1	0.1	0.1
	0	0	0	0.7	0.5	0	0.1	0.1	0.1	0	0	0
	0	0	0	0	0	0	0.1	0.1	0.1	0.1	0.1	0.1
	0	0	0	0	0	0	0.1	0.1	0.1	0.1	0.1	0.1
	0	0	0	0	0	0	0.1	0.1	0.1	0	0	0
	0.7	0.5	0	0	0	0	0.1	0.1	0.1	0	0	0
	0.2	0.2	0.1	0	0	0	0.1	0.1	0.1	0	0	0
	0	0	0	0	0	0	0.1	0.1	0.1	0.1	0.1	0.1
	0	0	0	0	0	0	0.1	0.1	0.1	0.2	0.2	0.1
	0	0	0	0	0	0	0.1	0.1	0.1	0.1	0.1	0.1
	0	0	0	0.2	0.2	0.1	0.1	0.1	0.1	0	0	0
	0	0	0	0	0	0	0.1	0.1	0.1	0	0	0
	0	0	0	0	0	0	0.1	0.1	0.1	0	0	0
	0	0	0	0.7	0.5	0	0.1	0.1	0.1	0	0	0
	0	0	0	0	0	0	0.1	0.1	0.1	0	0	0
	0.1	0.1	0.1	0.1	0.1	0.1	0.1	0.1	0.1	0.1	0.1	0.1
	0	0	0	0	0	0	0.1	0.1	0.1	0	0	0
	0	0	0	0	0	0	0.1	0.1	0.1	0	0	0
	0.4	0.3	0.1	0	0	0	0.1	0.1	0.1	0.2	0.2	0.1
	0	0	0	0	0	0	0.1	0.1	0.1	0.1	0.1	0.1
	0	0	0	0	0	0	0.1	0.1	0.1	0.1	0.1	0.1
	0.1	0.1	0.1	0.1	0.1	0.1	1	0.6	0.1	0	0	0
	0	0	0	0	0	0	0.1	0.1	0.1	0	0	0
	0	0	0	0	0	0	0.1	0.1	0.1	0	0	0
	0	0	0	0	0	0	0.1	0.1	0.1	0	0	0
	0.1	0.1	0.1	0.1	0.1	0.1	0.1	0.1	0.1	0.1	0.1	0.1
	0	0	0	0.1	0.1	0.1	0.1	0.1	0.1	0	0	0
	0	0	0	0	0	0	0.1	0.1	0.1	0.1	0.1	0.1
	0.1	0.1	0.1	0	0	0	0.1	0.1	0.1	0.1	0.1	0.1
	0	0	0	0.1	0.1	0.1	0.1	0.1	0.1	0.1	0.1	0.1
	0.1	0.1	0.1	0	0	0	0.1	0.1	0.1	0	0	0
	0	0	0	0	0	0	0.1	0.1	0.1	0	0	0
	0	0	0	0	0	0	0.2	0.2	0.2	0.1	0.1	0.1
	0	0	0	0.1	0.1	0.1	0.1	0.1	0.1	0.4	0.3	0.1
	0	0	0	0	0	0	0.1	0.1	0.1	0.2	0.2	0.1
	0.1	0.1	0.1	0.1	0.1	0.1	0.1	0.1	0.1	0.1	0.1	0.1
	0	0	0	0.1	0.1	0.1	0.1	0.1	0.1	0	0	0
	0	0	0	0	0	0	0.1	0.1	0.1	0	0	0
	0	0	0	0	0	0	0.1	0.1	0.1	0.1	0.1	0.1
	0.1	0.1	0.1	0	0	0	0.1	0.1	0.1	0	0	0
	0	0	0	0	0	0	0.1	0.1	0.1	0	0	0
	0.2	0.2	0.1	0.1	0.1	0.1	0.1	0.1	0.1	0	0	0
	0.1	0.1	0.1	0	0	0	0.1	0.1	0.1	0	0	0
	0.1	0.1	0.1	0	0	0	0.1	0.1	0.1	0	0	0
	0.3	0.3	0.1	0	0	0	0	0	0	0	0	0
	0	0	0	0.1	0.1	0.1	0	0	0	0	0	0
	0.1	0.1	0.1	0.1	0.1	0.1	0.1	0.1	0.1	0	0	0
	0	0	0	0	0	0	0.1	0.1	0.1	0	0	0
	0	0	0	0	0	0	0.1	0.1	0.1	0.1	0.1	0.1
	0	0	0	0	0	0	0.1	0.1	0.1	0	0	0
	0	0	0	0.1	0.1	0.1	0.2	0.2	0.2	0	0	0
	0	0	0	0	0	0	0.1	0.1	0.1	0	0	0
	0.1	0.1	0.1	0	0	0	0.1	0.1	0.1	0	0	0
	0.7	0.5	0	0	0	0	0.1	0.1	0.1	0	0	0
	0	0	0	0	0	0	0.1	0.1	0.1	0	0	0
	0	0	0	0.4	0.4	0.1	0.1	0.1	0.1	0	0	0
	0	0	0	0	0	0	0.1	0.1	0.1	0	0	0
	0	0	0	0.1	0.1	0.1	0.1	0.1	0.1	0	0	0
	0	0	0	0.1	0.1	0.1	0.1	0.1	0.1	0	0	0
	0.7	0.5	0	0.9	0.6	0	0.1	0.1	0.1	0	0	0
	0.1	0.1	0.1	0	0	0	0.1	0.1	0.1	0	0	0
	0.1	0.1	0.1	0	0	0	0.1	0.1	0.1	0	0	0
	0.1	0.1	0.1	0	0	0	0.1	0.1	0.1	0.1	0.1	0.1
	0	0	0	0.1	0.1	0.1	0.1	0.1	0.1	0.1	0.1	0.1
	0	0	0	0	0	0	0.2	0.2	0.1	0	0	0
	0.1	0.1	0.1	0	0	0	0.1	0.1	0.1	0	0	0
	0.1	0.1	0.1	0.1	0.1	0.1	0.1	0.1	0.1	0	0	0
	0.1	0.1	0.1	0	0	0	0.1	0.1	0.1	0.1	0.1	0.1
	0.1	0.1	0.1	0.1	0.1	0.1	0.2	0.2	0.2	0	0	0
	0	0	0	0.1	0.1	0.1	0.1	0.1	0.1	0	0	0
	0.1	0.1	0.1	0	0	0	0.1	0.1	0.1	0	0	0
	0	0	0	0	0	0	0	0	0	0	0	0
	0	0	0	0.1	0.1	0.1	0.1	0.1	0.1	0	0	0
	0	0	0	0	0	0	0.1	0.1	0.1	0.1	0.1	0.1
	0.1	0.1	0.1	0.1	0.1	0.1	0.1	0.1	0.1	0	0	0
	0	0	0	0.1	0.1	0.1	0.1	0.1	0.1	0	0	0
	0	0	0	0	0	0	0.1	0.1	0.1	0	0	0
	0	0	0	0	0	0	0.1	0.1	0.1	0	0	0
	0.1	0.1	0.1	0	0	0	0.1	0.1	0.1	0	0	0
	0	0	0	0	0	0	0.1	0.1	0.1	0.1	0.1	0.1
	0.1	0.1	0.1	0.4	0.3	0	0.1	0.1	0.1	0	0	0
	0	0	0	0.1	0.1	0.1	0.1	0.1	0.1	0.1	0.1	0.1
	0.1	0.1	0.1	0	0	0	0.1	0.1	0.1	0.1	0.1	0.1
	0.1	0.1	0.1	0	0	0	0.1	0.1	0.1	0	0	0
	0	0	0	0	0	0	0.1	0.1	0.1	0.1	0.1	0.1
	0	0	0	0.1	0.1	0.1	0.1	0.1	0.1	0	0	0
	0.1	0.1	0.1	0	0	0	0.1	0.1	0.1	0.1	0.1	0.1
	0.1	0.1	0.1	0	0	0	0.1	0.1	0.1	0	0	0
	0.1	0.1	0.1	0	0	0	0.1	0.1	0.1	0.1	0.1	0.1
	0	0	0	0.1	0.1	0.1	0.1	0.1	0.1	0.1	0.1	0.1
	0.1	0.1	0.1	0	0	0	0.1	0.1	0.1	0	0	0
	0	0	0	0	0	0	0.1	0.1	0.1	0	0	0
	0.1	0.1	0.1	0.1	0.1	0.1	0.1	0.1	0.1	0	0	0
	0.1	0.1	0.1	0	0	0	0.1	0.1	0.1	0	0	0
	0.1	0.1	0.1	0	0	0	0.1	0.1	0.1	0	0	0
	0	0	0	0.1	0.1	0.1	0.1	0.1	0.1	0	0	0
	0	0	0	0	0	0	0.1	0.1	0.1	0.2	0.2	0.1
	0	0	0	0	0	0	0.1	0.1	0.1	0.1	0.1	0.1
	0.1	0.1	0.1	0	0	0	0.1	0.1	0.1	0	0	0
	0	0	0	0	0	0	0	0	0	0	0	0
	0.1	0.1	0.1	0	0	0	0.1	0.1	0.1	0.1	0.1	0.1
	0	0	0	0	0	0	0.1	0.1	0.1	0	0	0
	0	0	0	0	0	0	0.1	0.1	0.1	0	0	0
	0.1	0.1	0.1	0	0	0	0.1	0.1	0.1	0	0	0
	0	0	0	0	0	0	0.1	0.1	0.1	0.1	0.1	0.1
	0	0	0	0	0	0	0.1	0.1	0.1	0.1	0.1	0.1
	0	0	0	0	0	0	0.1	0.1	0.1	0.1	0.1	0.1
	0.1	0.1	0.1	0	0	0	0.1	0.1	0.1	0	0	0
	0	0	0	0	0	0	0.1	0.1	0.1	0	0	0
	0	0	0	0	0	0	0.1	0.1	0.1	0.1	0.1	0.1
	0.1	0.1	0.1	0.2	0.2	0.1	0.1	0.1	0.1	0	0	0
	0	0	0	0	0	0	0.1	0.1	0.1	0.1	0.1	0.1
	0	0	0	0	0	0	0.1	0.1	0.1	0	0	0
	0.1	0.1	0.1	0	0	0	0.1	0.1	0.1	0	0	0
	0	0	0	0	0	0	0.1	0.1	0.1	0.1	0.1	0.1
	0.1	0.1	0.1	0	0	0	0.1	0.1	0.1	0	0	0
	0.1	0.1	0.1	0	0	0	0.1	0.1	0.1	0	0	0
	0.1	0.1	0.1	0	0	0	0.1	0.1	0.1	0.1	0.1	0.1
	0	0	0	0.1	0.1	0.1	0.1	0.1	0.1	0.1	0.1	0.1
	0.1	0.1	0.1	0	0	0	0.1	0.1	0.1	0	0	0
	0.1	0.1	0.1	0	0	0	0.1	0.1	0.1	0	0	0
	0.1	0.1	0.1	0	0	0	0.1	0.1	0.1	0	0	0
	0.1	0.1	0.1	0.1	0.1	0.1	0.1	0.1	0.1	0	0	0
	0	0	0	0.1	0.1	0.1	0.1	0.1	0.1	0	0	0
	0.1	0.1	0.1	0	0	0	0.1	0.1	0.1	0	0	0
	0	0	0	0	0	0	0.1	0.1	0.1	0.1	0.1	0.1
	0	0	0	0.1	0.1	0.1	0.1	0.1	0.1	0.1	0.1	0.1
	0	0	0	0	0	0	0.1	0.1	0.1	0	0	0
	0	0	0	0	0	0	0.1	0.1	0.1	0	0	0
	0.1	0.1	0.1	0	0	0	1	0.6	0.1	0.1	0.1	0.1
	0.1	0.1	0.1	0.1	0.1	0.1	0.1	0.1	0.1	0	0	0
	0	0	0	0	0	0	0.1	0.1	0.1	0.1	0.1	0.1
	0	0	0	0.1	0.1	0.1	0.1	0.1	0.1	0.1	0.1	0.1
	0.1	0.1	0.1	0.1	0.1	0.1	0.1	0.1	0.1	0	0	0
	0	0	0	0	0	0	0.1	0.1	0.1	0	0	0
	0	0	0	0	0	0	0.1	0.1	0.1	0.1	0.1	0.1
	0	0	0	0	0	0	0.1	0.1	0.1	0	0	0
	0.1	0.1	0.1	0.1	0.1	0.1	0.1	0.1	0.1	0.1	0.1	0.1
	0	0	0	0	0	0	0.1	0.1	0.1	0.1	0.1	0.1
	0.1	0.1	0.1	0	0	0	0.1	0.1	0.1	0	0	0
	0.1	0.1	0.1	0	0	0	0.1	0.1	0.1	0	0	0
	0.1	0.1	0.1	0	0	0	0.1	0.1	0.1	0.1	0.1	0.1
	0.1	0.1	0.1	0.1	0.1	0.1	0.1	0.1	0.1	0	0	0
	0.1	0.1	0.1	0.1	0.1	0.1	0.3	0.3	0.2	0.1	0.1	0.1
	0	0	0	0	0	0	0.1	0.1	0.1	0	0	0
	0	0	0	0.1	0.1	0.1	0.2	0.2	0.2	0	0	0
	0.1	0.1	0.1	0.2	0.2	0.1	0.1	0.1	0.1	0	0	0
	0.1	0.1	0.1	0	0	0	0.2	0.2	0.2	0	0	0
	0.1	0.1	0.1	0.1	0.1	0.1	0.1	0.1	0.1	0	0	0
	0	0	0	0.1	0.1	0.1	0.1	0.1	0.1	0	0	0
	0	0	0	0.1	0.1	0.1	0.1	0.1	0.1	0	0	0
	0.1	0.1	0.1	0	0	0	0.1	0.1	0.1	0	0	0
	0.1	0.1	0.1	0	0	0	0.2	0.2	0.2	0	0	0
	0	0	0	0.1	0.1	0.1	0.2	0.2	0.2	0.1	0.1	0.1
	0.1	0.1	0.1	0	0	0	0.1	0.1	0.1	0	0	0
	0	0	0	0.1	0.1	0.1	0.2	0.2	0.2	0.1	0.1	0.1
	0.1	0.1	0.1	0	0	0	0.1	0.1	0.1	0	0	0
	0	0	0	0	0	0	0.2	0.2	0.2	0	0	0
	0.1	0.1	0.1	0	0	0	0.2	0.2	0.2	0.1	0.1	0.1
	0	0	0	0.1	0.1	0.1	0.1	0.1	0.1	0	0	0
	0.1	0.1	0.1	0	0	0	0.1	0.1	0.1	0.1	0.1	0.1
	0	0	0	0.1	0.1	0.1	0.1	0.1	0.1	0	0	0
	0	0	0	0	0	0	0.1	0.1	0.1	0.1	0.1	0.1
	0	0	0	0.1	0.1	0.1	0.2	0.2	0.2	0	0	0
	0.1	0.1	0.1	0	0	0	0.2	0.2	0.2	0	0	0
	0.1	0.1	0.1	0	0	0	0.1	0.1	0.1	0.1	0.1	0.1
	0	0	0	0	0	0	0.1	0.1	0.1	0.1	0.1	0.1
	0.4	0.3	0.1	0.1	0.1	0.1	0.2	0.2	0.2	0	0	0
	0.1	0.1	0.1	0	0	0	0.1	0.1	0.1	0.4	0.4	0.1
	0.1	0.1	0.1	0	0	0	0.1	0.1	0.1	0	0	0
	0	0	0	0	0	0	0.1	0.1	0.1	0	0	0
	0.1	0.1	0.1	0	0	0	0.2	0.2	0.2	0	0	0
	0	0	0	0	0	0	0.1	0.1	0.1	0	0	0
	0	0	0	0.1	0.1	0.1	0.2	0.2	0.2	0.1	0.1	0.1
	0	0	0	0	0	0	0.1	0.1	0.1	0.1	0.1	0.1
	0.1	0.1	0.1	0	0	0	0.1	0.1	0.1	0.1	0.1	0.1
	0	0	0	0	0	0	0.2	0.2	0.2	0	0	0
	0	0	0	0	0	0	0.1	0.1	0.1	0	0	0
	0.1	0.1	0.1	0.1	0.1	0.1	0.1	0.1	0.1	0.1	0.1	0.1
	0.1	0.1	0.1	0	0	0	0.1	0.1	0.1	0.1	0.1	0.1
	0	0	0	0	0	0	0.1	0.1	0.1	0.1	0.1	0.1
	0	0	0	0	0	0	0.1	0.1	0.1	0.1	0.1	0.1
	0	0	0	0	0	0	0.1	0.1	0.1	0	0	0
	0.1	0.1	0.1	0.1	0.1	0.1	0.1	0.1	0.1	0.1	0.1	0.1
	0.1	0.1	0.1	0	0	0	0.1	0.1	0.1	0	0	0
	0	0	0	0.1	0.1	0.1	0.1	0.1	0.1	0	0	0
	0	0	0	0	0	0	0.1	0.1	0.1	0	0	0
	0.1	0.1	0.1	0	0	0	0.1	0.1	0.1	0	0	0
	0.1	0.1	0.1	0	0	0	0.1	0.1	0.1	0.1	0.1	0.1
	0	0	0	0	0	0	0.1	0.1	0.1	0	0	0
	0.1	0.1	0.1	0	0	0	0.1	0.1	0.1	0.1	0.1	0.1
	0	0	0	0	0	0	0.2	0.2	0.2	0	0	0
	0.1	0.1	0.1	0	0	0	0.1	0.1	0.1	0.1	0.1	0.1
	0.1	0.1	0.1	0	0	0	0.1	0.1	0.1	0	0	0
	0.1	0.1	0	0.1	0.1	0.1	0.1	0.1	0.1	0	0	0
	0	0	0	0.1	0.1	0.1	0.2	0.2	0.2	0	0	0
	0	0	0	0	0	0	0.1	0.1	0.1	0	0	0
	0.1	0.1	0.1	0	0	0	0.1	0.1	0.1	0	0	0
	0	0	0	0	0	0	0.1	0.1	0.1	0	0	0
	0	0	0	0	0	0	0.1	0.1	0.1	0	0	0
	0	0	0	0	0	0	0.1	0.1	0.1	0	0	0
	0.1	0.1	0.1	0	0	0	0.1	0.1	0.1	0.1	0.1	0.1
	0	0	0	0	0	0	0.1	0.1	0.1	0	0	0
	0	0	0	0	0	0	0.2	0.2	0.2	0	0	0
	0	0	0	0	0	0	0.1	0.1	0.1	0.1	0.1	0.1
	0.1	0.1	0.1	0.1	0.1	0.1	0.1	0.1	0.1	0.1	0.1	0.1
	0	0	0	0	0	0	0.2	0.2	0.2	0	0	0
	0	0	0	0	0	0	0.1	0.1	0.1	0	0	0
	0	0	0	0	0	0	0.2	0.2	0.2	0	0	0
	0	0	0	0.1	0.1	0.1	0.1	0.1	0.1	0.1	0.1	0.1
	0.1	0.1	0.1	0	0	0	0.1	0.1	0.1	0	0	0
	0	0	0	0.1	0.1	0.1	0.1	0.1	0.1	0.1	0.1	0.1
	0.2	0.2	0.2	0	0	0	0.1	0.1	0.1	0	0	0
	0	0	0	0	0	0	0.1	0.1	0.1	0.1	0.1	0.1
	0	0	0	0.1	0.1	0.1	0.1	0.1	0.1	0	0	0
	0.1	0.1	0.1	0.1	0.1	0.1	0.2	0.2	0.2	0.7	0.6	0
	0	0	0	0	0	0	0.1	0.1	0.1	0.1	0.1	0.1
	0.1	0.1	0.1	0	0	0	0.1	0.1	0.1	0	0	0
	0	0	0	0	0	0	0.2	0.2	0.2	0.1	0.1	0.1
	0	0	0	0	0	0	0.1	0.1	0.1	0.1	0.1	0.1
	0	0	0	0	0	0	0.1	0.1	0.1	0.1	0.1	0.1
	0.4	0.4	0.1	0	0	0	0.1	0.1	0.1	0.1	0.1	0.1
	0	0	0	0.1	0.1	0.1	0.1	0.1	0.1	0	0	0
	0.1	0.1	0.1	0	0	0	0	0	0	0	0	0
	0	0	0	0.1	0.1	0.1	0.1	0.1	0.1	0	0	0
	0	0	0	0.1	0.1	0.1	0.1	0.1	0.1	0.1	0.1	0.1
	0.1	0.1	0.1	0	0	0	0.1	0.1	0.1	0	0	0
	0	0	0	0	0	0	0.1	0.1	0.1	0.1	0.1	0.1
	0	0	0	0.1	0.1	0.1	0.1	0.1	0.1	0.1	0.1	0.1
	0	0	0	0	0	0	0.2	0.2	0.2	0	0	0
	0	0	0	0	0	0	0.1	0.1	0.1	0.1	0.1	0.1
	0.1	0.1	0.1	0	0	0	0.1	0.1	0.1	0.1	0.1	0.1
	0.1	0.1	0.1	0	0	0	0.2	0.2	0.2	0.1	0.1	0.1
	0.1	0.1	0.1	0	0	0	0.1	0.1	0.1	0.1	0.1	0.1
	0	0	0	0	0	0	0.2	0.2	0.2	0	0	0
	0	0	0	0	0	0	0.1	0.1	0.1	0	0	0
	0	0	0	0	0	0	0.1	0.1	0.1	0	0	0
	0.1	0.1	0.1	0	0	0	0.1	0.1	0.1	0.1	0.1	0.1
	0	0	0	0	0	0	0.1	0.1	0.1	0.1	0.1	0.1
	0.1	0.1	0.1	0.1	0.1	0.1	0.1	0.1	0.1	0	0	0
	0.1	0.1	0.1	0.1	0.1	0.1	0.1	0.1	0.1	0.1	0.1	0.1
	0.1	0.1	0.1	0.1	0.1	0.1	0.1	0.1	0.1	0.1	0.1	0.1
	0.1	0.1	0.1	0.1	0.1	0.1	0.1	0.1	0.1	0	0	0
	0.1	0.1	0.1	0	0	0	0.1	0.1	0.1	0	0	0
	0.1	0.1	0.1	0	0	0	0.1	0.1	0.1	0.1	0.1	0.1
	0.1	0.1	0.1	0	0	0	0.2	0.2	0.2	0	0	0
	0	0	0	0	0	0	0.2	0.2	0.2	0.1	0.1	0.1
	0.1	0.1	0.1	0	0	0	0.1	0.1	0.1	0.1	0.1	0.1
	0.1	0.1	0.1	0	0	0	0.1	0.1	0.1	0	0	0
	0	0	0	0	0	0	0.1	0.1	0.1	0	0	0
	0	0	0	0	0	0	0.2	0.2	0.2	0	0	0
	0	0	0	0.1	0.1	0.1	0.1	0.1	0.1	0.1	0.1	0.1
	0.1	0.1	0.1	0	0	0	0.1	0.1	0.1	0.1	0.1	0.1
	0	0	0	0	0	0	0.1	0.1	0.1	0	0	0
	0.1	0.1	0.1	0.1	0.1	0.1	0.1	0.1	0.1	0	0	0
	0	0	0	0.1	0.1	0.1	0.1	0.1	0.1	0	0	0
	0.1	0.1	0.1	0.1	0.1	0.1	0.1	0.1	0.1	0.1	0.1	0.1
	0.1	0.1	0.1	0	0	0	0.2	0.2	0.2	0.1	0.1	0.1
	0	0	0	0.1	0.1	0.1	0.1	0.1	0.1	0	0	0
	0	0	0	0	0	0	0.1	0.1	0.1	0.1	0.1	0.1
	0.1	0.1	0.1	0	0	0	0.1	0.1	0.1	0.1	0.1	0.1
	0.1	0.1	0.1	0	0	0	0.2	0.2	0.1	0.1	0.1	0.1
	0	0	0	0.1	0.1	0.1	0.1	0.1	0.1	0	0	0
	0	0	0	0.1	0.1	0.1	0.2	0.2	0.2	0	0	0
	0	0	0	0.1	0.1	0.1	0.1	0.1	0.1	0	0	0
	0	0	0	0.1	0.1	0.1	0.1	0.1	0.1	0	0	0
	0.1	0.1	0.1	0.1	0.1	0.1	0.1	0.1	0.1	0	0	0
	0.1	0.1	0.1	0	0	0	0.2	0.2	0.2	0	0	0
	0	0	0	0.1	0.1	0.1	0.1	0.1	0.1	0	0	0
	0	0	0	0	0	0	0.1	0.1	0.1	0	0	0
	0	0	0	0	0	0	0.1	0.1	0.1	0.1	0.1	0.1
	0	0	0	0.2	0.2	0.1	0.1	0.1	0.1	0	0	0
	0.1	0.1	0.1	0	0	0	0.1	0.1	0.1	0.1	0.1	0.1
	0.1	0.1	0.1	0	0	0	0.1	0.1	0.1	0	0	0
	0	0	0	0	0	0	0.1	0.1	0.1	0	0	0
	0.1	0.1	0.1	0.1	0.1	0.1	0.1	0.1	0.1	0	0	0
	0.1	0.1	0.1	0	0	0	0.1	0.1	0.1	0.1	0.1	0.1
	0.1	0.1	0.1	0	0	0	0.1	0.1	0.1	0	0	0
	0.1	0.1	0.1	0	0	0	0.1	0.1	0.1	0.1	0.1	0.1
	0	0	0	0.1	0.1	0.1	0.1	0.1	0.1	0.1	0.1	0.1
	0.1	0.1	0.1	0.1	0.1	0.1	0.1	0.1	0.1	0.1	0.1	0.1
	0.1	0.1	0.1	0	0	0	0.1	0.1	0.1	0	0	0
	0	0	0	0.1	0.1	0.1	0.1	0.1	0.1	0.1	0.1	0.1
	0	0	0	0.1	0.1	0.1	0.1	0.1	0.1	0.1	0.1	0.1
	0.1	0.1	0.1	0	0	0	0.1	0.1	0.1	0	0	0
	0	0	0	0	0	0	0.2	0.2	0.2	0.1	0.1	0.1
	0.1	0.1	0.1	0.1	0.1	0.1	0.1	0.1	0.1	0.1	0.1	0.1
	0	0	0	0	0	0	0.1	0.1	0.1	0.1	0.1	0.1
	0	0	0	0	0	0	0.1	0.1	0.1	0.1	0.1	0.1
	0.1	0.1	0.1	0.1	0.1	0.1	0.1	0.1	0.1	0.1	0.1	0.1
	0.1	0.1	0.1	0	0	0	0.1	0.1	0.1	0	0	0
	0	0	0	0.1	0.1	0.1	0.1	0.1	0.1	0.1	0.1	0.1
	0	0	0	0	0	0	0.2	0.2	0.2	0.1	0.1	0.1
	0	0	0	0.1	0.1	0.1	0.1	0.1	0.1	0.1	0.1	0.1
	0.1	0.1	0.1	0.1	0.1	0.1	0.1	0.1	0.1	0	0	0
	0	0	0	0	0	0	0.1	0.1	0.1	0	0	0
	0.1	0.1	0.1	0	0	0	0.2	0.2	0.2	0.1	0.1	0.1
	0.1	0.1	0.1	0	0	0	0.1	0.1	0.1	0.1	0.1	0.1
	0	0	0	0.1	0.1	0.1	0.1	0.1	0.1	0.1	0.1	0.1
	0	0	0	0	0	0	0.1	0.1	0.1	0.1	0.1	0.1
	0	0	0	0.1	0.1	0.1	0.2	0.2	0.2	0	0	0
	0	0	0	0	0	0	0.1	0.1	0.1	0.1	0.1	0.1
	0.1	0.1	0.1	0.1	0.1	0.1	0.1	0.1	0.1	0.1	0.1	0.1
	0.1	0.1	0.1	0.1	0.1	0.1	0.1	0.1	0.1	0	0	0
	0.1	0.1	0.1	0.1	0.1	0.1	0.1	0.1	0.1	0	0	0
	0.1	0.1	0.1	0	0	0	0.1	0.1	0.1	0.1	0.1	0.1
	0.1	0.1	0.1	0	0	0	0.1	0.1	0.1	0.1	0.1	0.1
	0	0	0	0	0	0	0.1	0.1	0.1	0.1	0.1	0.1
	0	0	0	0	0	0	0.1	0.1	0.1	0.1	0.1	0.1
	0	0	0	0.1	0.1	0.1	0.1	0.1	0.1	0	0	0
	0	0	0	0.1	0.1	0.1	0.1	0.1	0.1	0.1	0.1	0.1
	0	0	0	0.9	0.6	0.1	0.1	0.1	0.1	0	0	0
	0.1	0.1	0.1	0	0	0	0.1	0.1	0.1	0.1	0.1	0.1
	0.1	0.1	0.1	0.1	0.1	0.1	0.1	0.1	0.1	0.1	0.1	0.1
	0.1	0.1	0.1	0	0	0	0.1	0.1	0.1	0.1	0.1	0.1
	0.1	0.1	0.1	0	0	0	0.1	0.1	0.1	0	0	0
	0.1	0.1	0.1	0.1	0.1	0.1	0.1	0.1	0.1	0	0	0
	0.1	0.1	0.1	0.1	0.1	0.1	0.2	0.2	0.2	0.1	0.1	0.1
	0	0	0	0	0	0	0.1	0.1	0.1	0	0	0
	0.1	0.1	0.1	0	0	0	0.1	0.1	0.1	0.1	0.1	0.1
	0	0	0	0	0	0	0.1	0.1	0.1	0.1	0.1	0.1
	0.1	0.1	0.1	0.1	0.1	0.1	0.1	0.1	0.1	0	0	0
	0.1	0.1	0.1	0	0	0	0.1	0.1	0.1	0.1	0.1	0.1
	0	0	0	0.1	0.1	0.1	0.1	0.1	0.1	0	0	0
	0	0	0	0	0	0	0.1	0.1	0.1	0	0	0
	0.1	0.1	0.1	0.1	0.1	0.1	0.1	0.1	0.1	0	0	0
	0.1	0.1	0.1	0	0	0	0.2	0.2	0.2	0	0	0
	0	0	0	0.1	0.1	0.1	0.2	0.2	0.2	0.1	0.1	0.1
	0.1	0.1	0.1	0	0	0	0.2	0.2	0.2	0	0	0
	0.1	0.1	0.1	0.1	0.1	0.1	0.1	0.1	0.1	0.1	0.1	0.1
	0.1	0.1	0.1	0.1	0.1	0.1	0.1	0.1	0.1	0	0	0
	0	0	0	0	0	0	0.1	0.1	0.1	0.1	0.1	0.1
	0.1	0.1	0.1	0	0	0	0.2	0.2	0.2	0.1	0.1	0.1
	0	0	0	0	0	0	0.1	0.1	0.1	0.1	0.1	0.1
	0.1	0.1	0.1	0.1	0.1	0.1	0.1	0.1	0.1	0.1	0.1	0.1
	0	0	0	0.1	0.1	0.1	0.1	0.1	0.1	0.1	0.1	0.1
	0	0	0	0	0	0	0.1	0.1	0.1	0	0	0
	0.1	0.1	0.1	0.1	0.1	0.1	0.1	0.1	0.1	0.1	0.1	0.1
	0.1	0.1	0.1	0.1	0.1	0.1	0.1	0.1	0.1	0	0	0
	0.1	0.1	0.1	0	0	0	0.2	0.2	0.2	0	0	0
	0.1	0.1	0.1	0.1	0.1	0.1	0.1	0.1	0.1	0	0	0
	0	0	0	0	0	0	0.1	0.1	0.1	0.1	0.1	0.1
	0	0	0	0.1	0.1	0.1	0.1	0.1	0.1	0.4	0.4	0.1
	0	0	0	0.1	0.1	0.1	0.1	0.1	0.1	0	0	0
	0	0	0	0	0	0	0.2	0.2	0.2	0.1	0.1	0.1
	0	0	0	0	0	0	0.2	0.2	0.2	0.1	0.1	0.1
	0.1	0.1	0.1	0	0	0	0.1	0.1	0.1	0	0	0
	0.1	0.1	0.1	0	0	0	0.2	0.2	0.2	0.1	0.1	0.1
	0.1	0.1	0.1	0	0	0	0.1	0.1	0.1	0.1	0.1	0.1
	0.1	0.1	0.1	0	0	0	0.1	0.1	0.1	0.1	0.1	0.1
	0	0	0	0.1	0.1	0.1	0.1	0.1	0.1	0	0	0
	0	0	0	0.1	0.1	0.1	0.1	0.1	0.1	0	0	0
	0	0	0	0	0	0	0.1	0.1	0.1	0.1	0.1	0.1
	0.1	0.1	0.1	0	0	0	0.1	0.1	0.1	0.1	0.1	0.1
	0.1	0.1	0.1	0.1	0.1	0.1	0.1	0.1	0.1	0.1	0.1	0.1
	0	0	0	0	0	0	0.1	0.1	0.1	0.1	0.1	0.1
	0.1	0.1	0.1	0	0	0	0.1	0.1	0.1	0.1	0.1	0.1
	0.1	0.1	0.1	0.1	0.1	0.1	0.1	0.1	0.1	0.1	0.1	0.1
	0	0	0	0.1	0.1	0.1	0.1	0.1	0.1	0.1	0.1	0.1
	0.1	0.1	0.1	0.1	0.1	0.1	0.2	0.2	0.2	0.1	0.1	0.1
	0.1	0.1	0.1	0.1	0.1	0.1	0.1	0.1	0.1	0.1	0.1	0.1
	0.1	0.1	0.1	0	0	0	0.1	0.1	0.1	0	0	0
	0	0	0	0	0	0	0.1	0.1	0.1	0	0	0
	0	0	0	0	0	0	0.1	0.1	0.1	0.1	0.1	0.1
	0.1	0.1	0.1	0	0	0	0.1	0.1	0.1	0.1	0.1	0.1
	0	0	0	0.1	0.1	0.1	0.1	0.1	0.1	0	0	0
	0	0	0	0	0	0	0.1	0.1	0.1	0.1	0.1	0.1
	0.1	0.1	0.1	0	0	0	0.1	0.1	0.1	0.1	0.1	0.1
	0.1	0.1	0.1	0.1	0.1	0.1	0.1	0.1	0.1	0.1	0.1	0.1
	0.1	0.1	0.1	0	0	0	0.1	0.1	0.1	0.1	0.1	0.1
	0	0	0	0.1	0.1	0.1	0.1	0.1	0.1	0.1	0.1	0.1
	0	0	0	0	0	0	0.1	0.1	0.1	0	0	0
	0	0	0	0	0	0	0.1	0.1	0.1	0.1	0.1	0.1
	0	0	0	0	0	0	0.2	0.2	0.2	0.1	0.1	0.1
	0	0	0	0.1	0.1	0.1	0.1	0.1	0.1	0.1	0.1	0.1
	0	0	0	0	0	0	0.1	0.1	0.1	0.1	0.1	0.1
	0	0	0	0	0	0	0.2	0.2	0.2	0.1	0.1	0.1
	0	0	0	0	0	0	0.1	0.1	0.1	0	0	0
	0.1	0.1	0.1	0	0	0	0.2	0.2	0.2	0	0	0
	0.1	0.1	0.1	0	0	0	0.1	0.1	0.1	0.1	0.1	0.1
	0.1	0.1	0.1	0	0	0	0.1	0.1	0.1	0	0	0
	0	0	0	0	0	0	0.1	0.1	0.1	0	0	0
	0	0	0	0.1	0.1	0.1	0.1	0.1	0.1	0	0	0
	0	0	0	0.1	0.1	0.1	0.1	0.1	0.1	0.1	0.1	0.1
	0	0	0	0	0	0	0.1	0.1	0.1	0	0	0
	0.1	0.1	0.1	0.1	0.1	0.1	0.1	0.1	0.1	0.1	0.1	0.1
	0.1	0.1	0.1	0	0	0	0.1	0.1	0.1	0.1	0.1	0.1
	0.1	0.1	0.1	0	0	0	0.2	0.2	0.2	0.1	0.1	0.1
	0.1	0.1	0.1	0.1	0.1	0.1	0.1	0.1	0.1	0	0	0
	0.1	0.1	0.1	0.1	0.1	0.1	0.2	0.2	0.2	0.1	0.1	0.1
	0.1	0.1	0.1	0	0	0	0.1	0.1	0.1	0	0	0
	0.1	0.1	0.1	0	0	0	0.1	0.1	0.1	0.1	0.1	0.1
	0.1	0.1	0.1	0.1	0.1	0.1	0.1	0.1	0.1	0	0	0
	0.1	0.1	0.1	0.1	0.1	0.1	0.2	0.2	0.2	0.1	0.1	0.1
	0	0	0	0.1	0.1	0.1	0.1	0.1	0.1	0.1	0.1	0.1
	0	0	0	0	0	0	0.1	0.1	0.1	0	0	0
	0	0	0	0	0	0	0.1	0.1	0.1	0	0	0
	0.1	0.1	0.1	0	0	0	0.2	0.2	0.2	0.1	0.1	0.1
	0.1	0.1	0.1	0	0	0	0.1	0.1	0.1	0.1	0.1	0.1
	0.1	0.1	0.1	0.1	0.1	0.1	0.1	0.1	0.1	0.1	0.1	0.1
	0	0	0	0	0	0	0.1	0.1	0.1	0.1	0.1	0.1
	0	0	0	0	0	0	0.1	0.1	0.1	0.1	0.1	0.1
	0.1	0.1	0.1	0.1	0.1	0.1	0.1	0.1	0.1	0.1	0.1	0.1
	0	0	0	0	0	0	0.1	0.1	0.1	0.1	0.1	0.1
	0.1	0.1	0.1	0	0	0	0.1	0.1	0.1	0	0	0
	0	0	0	0.1	0.1	0.1	0.1	0.1	0.1	0	0	0
	0.1	0.1	0.1	0	0	0	0.1	0.1	0.1	0	0	0
	0	0	0	0.1	0.1	0.1	0.1	0.1	0.1	0.1	0.1	0.1
	0.1	0.1	0.1	0.1	0.1	0.1	0.1	0.1	0.1	0.1	0.1	0.1
	0.1	0.1	0.1	0	0	0	0.1	0.1	0.1	0.1	0.1	0.1
	0.1	0.1	0.1	0	0	0	0.1	0.1	0.1	0.1	0.1	0.1
	0	0	0	0.1	0.1	0.1	0.1	0.1	0.1	0.1	0.1	0.1
	0.1	0.1	0.1	0	0	0	0.1	0.1	0.1	0	0	0
	0.1	0.1	0.1	0.1	0.1	0.1	0.1	0.1	0.1	0.1	0.1	0.1
	0.1	0.1	0.1	0.1	0.1	0.1	0.1	0.1	0.1	0	0	0
	0.1	0.1	0.1	0	0	0	0.1	0.1	0.1	0.1	0.1	0.1
	0	0	0	0.1	0.1	0.1	0.1	0.1	0.1	0.1	0.1	0.1
	0	0	0	0	0	0	0.2	0.2	0.2	0.1	0.1	0.1
	0.1	0.1	0.1	0	0	0	0.1	0.1	0.1	0.1	0.1	0.1
	0.1	0.1	0.1	0.1	0.1	0.1	0.1	0.1	0.1	0.1	0.1	0.1
	0.1	0.1	0.1	0	0	0	0.1	0.1	0.1	0.1	0.1	0.1
	0.1	0.1	0.1	0	0	0	0.1	0.1	0.1	0.1	0.1	0.1
	0	0	0	0	0	0	0.1	0.1	0.1	0.1	0.1	0.1
	0	0	0	0.1	0.1	0.1	0.1	0.1	0.1	0.1	0.1	0.1
	0.1	0.1	0.1	0.1	0.1	0.1	0.1	0.1	0.1	0.1	0.1	0.1
	0.1	0.1	0.1	0	0	0	0.1	0.1	0.1	0.1	0.1	0.1
	0	0	0	0.1	0.1	0.1	0.1	0.1	0.1	0.1	0.1	0.1
	0	0	0	0.1	0.1	0.1	0.1	0.1	0.1	0.1	0.1	0.1
	0.1	0.1	0.1	0.1	0.1	0.1	0.2	0.2	0.2	0	0	0
	0.1	0.1	0.1	0	0	0	0.1	0.1	0.1	0	0	0
	0	0	0	0	0	0	0.1	0.1	0.1	0	0	0
	0	0	0	0.1	0.1	0.1	0.2	0.2	0.2	0	0	0
	0.1	0.1	0.1	0.1	0.1	0.1	0.1	0.1	0.1	0.1	0.1	0.1
	0.1	0.1	0.1	0.1	0.1	0.1	0.1	0.1	0.1	0	0	0
	0	0	0	0.1	0.1	0.1	0.1	0.1	0.1	0.1	0.1	0.1
	0.1	0.1	0.1	0	0	0	0.1	0.1	0.1	0.1	0.1	0.1
	0	0	0	0	0	0	0.1	0.1	0.1	0.1	0.1	0.1
	0.1	0.1	0.1	0	0	0	0.1	0.1	0.1	0.1	0.1	0.1
	0	0	0	0.1	0.1	0.1	0.1	0.1	0.1	0.1	0.1	0.1
	0	0	0	0	0	0	0	0	0	0	0	0
	0.1	0.1	0.1	0	0	0	0.1	0.1	0.1	0	0	0
	0.1	0.1	0.1	0	0	0	0.1	0.1	0.1	0.1	0.1	0.1
	0	0	0	0.1	0.1	0.1	0.1	0.1	0.1	0.1	0.1	0.1
	0	0	0	0	0	0	0.1	0.1	0.1	0.1	0.1	0.1
	0.1	0.1	0.1	0.1	0.1	0.1	0.2	0.2	0.2	0.1	0.1	0.1
	0.1	0.1	0.1	0.1	0.1	0.1	0.1	0.1	0.1	0.1	0.1	0.1
	0	0	0	0.1	0.1	0.1	0.2	0.2	0.2	0	0	0
	0	0	0	0.1	0.1	0.1	0.1	0.1	0.1	0.1	0.1	0.1
	0	0	0	0.1	0.1	0.1	0.1	0.1	0.1	0.1	0.1	0.1
	0.1	0.1	0.1	0.1	0.1	0.1	0.1	0.1	0.1	0	0	0
	0	0	0	0	0	0	0.1	0.1	0.1	0.1	0.1	0.1
	0.1	0.1	0.1	0.1	0.1	0.1	0.2	0.2	0.2	0	0	0
	0.1	0.1	0.1	0	0	0	0.1	0.1	0.1	0.1	0.1	0.1
	0	0	0	0	0	0	0.1	0.1	0.1	0	0	0
	0	0	0	0.1	0.1	0.1	0.1	0.1	0.1	0	0	0
	0.1	0.1	0.1	0	0	0	0.1	0.1	0.1	0	0	0
	0	0	0	0	0	0	0.2	0.2	0.2	0.1	0.1	0.1
	0.1	0.1	0.1	0	0	0	0.1	0.1	0.1	0.1	0.1	0.1
	0	0	0	0.1	0.1	0.1	0.2	0.2	0.2	0.1	0.1	0.1
	0.1	0.1	0.1	0.1	0.1	0.1	0.1	0.1	0.1	0.1	0.1	0.1
	0.1	0.1	0.1	0	0	0	0.1	0.1	0.1	0	0	0
	0.1	0.1	0.1	0.1	0.1	0.1	0.1	0.1	0.1	0	0	0
	0.1	0.1	0.1	0	0	0	0.1	0.1	0.1	0.1	0.1	0.1
	0	0	0	0.1	0.1	0.1	0.1	0.1	0.1	0.1	0.1	0.1
	0	0	0	0.1	0.1	0.1	0.1	0.1	0.1	0	0	0
	0	0	0	0.1	0.1	0.1	0.1	0.1	0.1	0.1	0.1	0.1
	0.1	0.1	0.1	0	0	0	0.1	0.1	0.1	0.1	0.1	0.1
	0.1	0.1	0.1	0.1	0.1	0.1	0.1	0.1	0.1	0.1	0.1	0.1
	0	0	0	0.1	0.1	0.1	0.1	0.1	0.1	0.1	0.1	0.1
	0	0	0	0	0	0	0.1	0.1	0.1	0.1	0.1	0.1
	0	0	0	0.1	0.1	0.1	0.1	0.1	0.1	0.1	0.1	0.1
	0.1	0.1	0.1	0	0	0	0.1	0.1	0.1	0.1	0.1	0.1
	0	0	0	0.1	0.1	0.1	0.1	0.1	0.1	0.1	0.1	0.1
	0	0	0	0	0	0	0.1	0.1	0.1	0.1	0.1	0.1
	0	0	0	0.1	0.1	0.1	0.1	0.1	0.1	0.1	0.1	0.1
	0.2	0.2	0.1	0	0	0	0.1	0.1	0.1	0	0	0
	0.1	0.1	0.1	0.1	0.1	0.1	0.1	0.1	0.1	0.1	0.1	0.1
	0	0	0	0	0	0	0.1	0.1	0.1	0.1	0.1	0.1
	0.1	0.1	0.1	0	0	0	0.1	0.1	0.1	0.1	0.1	0.1
	0.1	0.1	0.1	0.1	0.1	0.1	0.1	0.1	0.1	0.1	0.1	0.1
	0.1	0.1	0.1	0	0	0	0.2	0.2	0.2	0	0	0
	0.1	0.1	0.1	0.1	0.1	0.1	0.1	0.1	0.1	0.1	0.1	0.1
	0.1	0.1	0.1	0.1	0.1	0.1	0.1	0.1	0.1	0.1	0.1	0.1
	0.1	0.1	0.1	0.1	0.1	0.1	0.2	0.2	0.2	0	0	0
	0	0	0	0	0	0	0.1	0.1	0.1	0	0	0
	0	0	0	0	0	0	0.2	0.2	0.2	0.1	0.1	0.1
	0.1	0.1	0.1	0.1	0.1	0.1	0.1	0.1	0.1	0.1	0.1	0.1
	0	0	0	0.1	0.1	0.1	0.1	0.1	0.1	0	0	0
	0	0	0	0	0	0	0.1	0.1	0.1	0.1	0.1	0.1
	0.1	0.1	0.1	0	0	0	0.1	0.1	0.1	0.1	0.1	0.1
	0.1	0.1	0.1	0	0	0	0.1	0.1	0.1	0.1	0.1	0.1
	0.1	0.1	0.1	0	0	0	0.2	0.2	0.2	0.1	0.1	0.1
	0	0	0	0	0	0	0.2	0.2	0.2	0.1	0.1	0.1
	0	0	0	0.1	0.1	0.1	0.1	0.1	0.1	0.1	0.1	0.1
	0	0	0	0.1	0.1	0.1	0.2	0.2	0.2	0.1	0.1	0.1
	0.1	0.1	0.1	0.1	0.1	0.1	0.1	0.1	0.1	0.1	0.1	0.1
	0	0	0	0.1	0.1	0.1	0.1	0.1	0.1	0.1	0.1	0.1
	0	0	0	0.1	0.1	0.1	0.1	0.1	0.1	0	0	0
	0	0	0	0	0	0	0.1	0.1	0.1	0.1	0.1	0.1
	0	0	0	0.1	0.1	0.1	0.1	0.1	0.1	0	0	0
	0.1	0.1	0.1	0.1	0.1	0.1	0.1	0.1	0.1	0.1	0.1	0.1
	0.1	0.1	0.1	0	0	0	0.1	0.1	0.1	0.1	0.1	0.1
	0.1	0.1	0.1	0.1	0.1	0.1	0.2	0.2	0.2	0.1	0.1	0.1
	0	0	0	0	0	0	0.1	0.1	0.1	0.1	0.1	0.1
	0.1	0.1	0.1	0.1	0.1	0.1	0.1	0.1	0.1	0	0	0
	0	0	0	0.1	0.1	0.1	0.1	0.1	0.1	0	0	0
	0.1	0.1	0.1	0	0	0	0.1	0.1	0.1	0	0	0
	0.1	0.1	0.1	0.1	0.1	0.1	0.1	0.1	0.1	0.1	0.1	0.1
	0.1	0.1	0.1	0	0	0	0.1	0.1	0.1	0.1	0.1	0.1
	0.1	0.1	0.1	0.1	0.1	0.1	0.2	0.2	0.2	0.1	0.1	0.1
	0	0	0	0.1	0.1	0.1	0.1	0.1	0.1	0.1	0.1	0.1
	0.1	0.1	0.1	0	0	0	0.1	0.1	0.1	0.1	0.1	0.1
	0	0	0	0.1	0.1	0.1	0.1	0.1	0.1	0.1	0.1	0.1
	0.1	0.1	0.1	0	0	0	0.1	0.1	0.1	0.1	0.1	0.1
	0	0	0	0	0	0	0.1	0.1	0.1	0.1	0.1	0.1
	0	0	0	0	0	0	0.2	0.2	0.2	0.1	0.1	0.1
	0.1	0.1	0.1	0	0	0	0.1	0.1	0.1	0.1	0.1	0.1
	0	0	0	0.1	0.1	0.1	0.1	0.1	0.1	0	0	0
	0	0	0	0	0	0	0.1	0.1	0.1	0	0	0
	0.1	0.1	0.1	0	0	0	0.1	0.1	0.1	0.1	0.1	0.1
	0.1	0.1	0.1	0	0	0	0.1	0.1	0.1	0	0	0
	0.1	0.1	0.1	0.1	0.1	0.1	0.1	0.1	0.1	0.1	0.1	0.1
	0	0	0	0	0	0	0.1	0.1	0.1	0.1	0.1	0.1
	0.1	0.1	0.1	0.1	0.1	0.1	0.1	0.1	0.1	0	0	0
	0.1	0.1	0.1	0.1	0.1	0.1	0.1	0.1	0.1	0.1	0.1	0.1
	0.1	0.1	0.1	0	0	0	0.2	0.2	0.2	0.1	0.1	0.1
	0	0	0	0	0	0	0.1	0.1	0.1	0	0	0
	0	0	0	0	0	0	0.1	0.1	0.1	0	0	0
	0.1	0.1	0.1	0.1	0.1	0.1	0.1	0.1	0.1	0.1	0.1	0.1
	0.1	0.1	0.1	0.1	0.1	0.1	0.1	0.1	0.1	0	0	0
	0.1	0.1	0.1	0.1	0.1	0.1	0.1	0.1	0.1	0.1	0.1	0.1
	0.1	0.1	0.1	0.1	0.1	0.1	0.1	0.1	0.1	0.1	0.1	0.1
	0.1	0.1	0.1	0.1	0.1	0.1	0.2	0.2	0.2	0	0	0
	0.4	0.4	0.1	0.1	0.1	0.1	0.1	0.1	0.1	0.1	0.1	0.1
	0.1	0.1	0.1	0.1	0.1	0.1	0.1	0.1	0.1	0	0	0
	0.1	0.1	0.1	0	0	0	0.1	0.1	0.1	0.1	0.1	0.1
	0.1	0.1	0.1	0.1	0.1	0.1	0.1	0.1	0.1	0.1	0.1	0.1
	0.1	0.1	0.1	0.1	0.1	0.1	0.1	0.1	0.1	0	0	0
	0.1	0.1	0.1	0.1	0.1	0.1	0.1	0.1	0.1	0.1	0.1	0.1
	0	0	0	0	0	0	0.1	0.1	0.1	0.1	0.1	0.1
	0	0	0	0	0	0	0.1	0.1	0.1	0.1	0.1	0.1
	0.1	0.1	0.1	0	0	0	0.1	0.1	0.1	0.1	0.1	0.1
	0.1	0.1	0.1	0.1	0.1	0.1	0.1	0.1	0.1	0.1	0.1	0.1
	0	0	0	0.1	0.1	0.1	0.1	0.1	0.1	0	0	0
	0.1	0.1	0.1	0	0	0	0.1	0.1	0.1	0.1	0.1	0.1
	0.1	0.1	0.1	0.1	0.1	0.1	0.1	0.1	0.1	0.1	0.1	0.1
	0.1	0.1	0.1	0	0	0	0.1	0.1	0.1	0.1	0.1	0.1
	0.1	0.1	0.1	0	0	0	0.1	0.1	0.1	0	0	0
	0.1	0.1	0.1	0	0	0	0.1	0.1	0.1	0.1	0.1	0.1
	0	0	0	0	0	0	0.1	0.1	0.1	0.1	0.1	0.1
	0	0	0	0.1	0.1	0.1	0.2	0.2	0.2	0.1	0.1	0.1
	0.1	0.1	0.1	0.1	0.1	0.1	0.1	0.1	0.1	0.1	0.1	0.1
	0.1	0.1	0.1	0	0	0	0.1	0.1	0.1	0.1	0.1	0.1
	0.1	0.1	0.1	0	0	0	0.1	0.1	0.1	0.1	0.1	0.1
	0	0	0	0	0	0	0.1	0.1	0.1	0.1	0.1	0.1
	0.1	0.1	0.1	0	0	0	0.1	0.1	0.1	0.1	0.1	0.1
	0	0	0	0	0	0	0.1	0.1	0.1	0.1	0.1	0.1
	0.1	0.1	0.1	0	0	0	0.1	0.1	0.1	0.1	0.1	0.1
	0	0	0	0.1	0.1	0.1	0.1	0.1	0.1	0.1	0.1	0.1
	0.1	0.1	0.1	0	0	0	0.1	0.1	0.1	0	0	0
	0.1	0.1	0.1	0.1	0.1	0.1	0.1	0.1	0.1	0	0	0
	0.1	0.1	0.1	0.1	0.1	0.1	0.1	0.1	0.1	0.1	0.1	0.1
	0.1	0.1	0.1	0	0	0	0.1	0.1	0.1	0.1	0.1	0.1
	0	0	0	0.1	0.1	0.1	0.1	0.1	0.1	0.1	0.1	0.1
	0.1	0.1	0.1	0.1	0.1	0.1	0.1	0.1	0.1	0.1	0.1	0.1
	0.1	0.1	0.1	0.2	0.2	0.1	0.1	0.1	0.1	0.1	0.1	0.1
	0	0	0	0.1	0.1	0.1	0.2	0.2	0.2	0.1	0.1	0.1
	0.1	0.1	0.1	0	0	0	0.2	0.2	0.2	0.1	0.1	0.1
	0.1	0.1	0.1	0	0	0	0.1	0.1	0.1	0.1	0.1	0.1
	0	0	0	0	0	0	0.1	0.1	0.1	0.1	0.1	0.1
	0	0	0	0	0	0	0.1	0.1	0.1	0	0	0
	0.1	0.1	0.1	0.1	0.1	0.1	0.1	0.1	0.1	0	0	0
	0.1	0.1	0.1	0.1	0.1	0.1	0.1	0.1	0.1	0.1	0.1	0.1
	0	0	0	0.1	0.1	0.1	0.1	0.1	0.1	0.1	0.1	0.1
	0.1	0.1	0.1	0	0	0	0.1	0.1	0.1	0.1	0.1	0.1
	0	0	0	0.1	0.1	0.1	0.1	0.1	0.1	0.1	0.1	0.1
	0.1	0.1	0.1	0.1	0.1	0.1	0.1	0.1	0.1	0.1	0.1	0.1
	0.1	0.1	0.1	0.1	0.1	0.1	0.1	0.1	0.1	0.1	0.1	0.1
	0.1	0.1	0.1	0	0	0	0.1	0.1	0.1	0.1	0.1	0.1
	0	0	0	0	0	0	0	0	0	0.1	0.1	0.1
	0.1	0.1	0.1	0	0	0	0.1	0.1	0.1	0.1	0.1	0.1
	0.1	0.1	0.1	0	0	0	0.1	0.1	0.1	0.1	0.1	0.1
	0	0	0	0.1	0.1	0.1	0.1	0.1	0.1	0.1	0.1	0.1
	0.1	0.1	0.1	0	0	0	0.1	0.1	0.1	0.1	0.1	0.1
	0	0	0	0	0	0	0.1	0.1	0.1	0.1	0.1	0.1
	0.1	0.1	0.1	0.1	0.1	0.1	0.1	0.1	0.1	0.1	0.1	0.1
	0.1	0.1	0.1	0	0	0	0.1	0.1	0.1	0.1	0.1	0.1
	0	0	0	0.1	0.1	0.1	0.1	0.1	0.1	0.1	0.1	0.1
	0.1	0.1	0.1	0.1	0.1	0.1	0.1	0.1	0.1	0.1	0.1	0.1
	0.1	0.1	0.1	0	0	0	0.1	0.1	0.1	0.1	0.1	0.1
	0.1	0.1	0.1	0	0	0	0.2	0.2	0.2	0.1	0.1	0.1
	0.1	0.1	0.1	0	0	0	0.2	0.2	0.2	0	0	0
	0	0	0	0.1	0.1	0.1	0.1	0.1	0.1	0.1	0.1	0.1
	0.1	0.1	0.1	0.1	0.1	0.1	0.1	0.1	0.1	0.1	0.1	0.1
	0.2	0.2	0.1	0.1	0.1	0.1	0.1	0.1	0.1	0.1	0.1	0.1
	0	0	0	0	0	0	0.1	0.1	0.1	0.1	0.1	0.1
	0	0	0	0.1	0.1	0.1	0.1	0.1	0.1	0.1	0.1	0.1
	0.1	0.1	0.1	0.1	0.1	0.1	0.1	0.1	0.1	0	0	0
	0.1	0.1	0.1	0.1	0.1	0.1	0.1	0.1	0.1	0.1	0.1	0.1
	0.1	0.1	0.1	0.1	0.1	0.1	0.2	0.2	0.2	0.1	0.1	0.1
	0.1	0.1	0.1	0	0	0	0.2	0.2	0.2	0.1	0.1	0.1
	0.1	0.1	0.1	0.1	0.1	0.1	0.1	0.1	0.1	0.1	0.1	0.1
	0	0	0	0.1	0.1	0.1	0.1	0.1	0.1	0.1	0.1	0.1
	0.2	0.2	0.1	0.1	0.1	0.1	0.1	0.1	0.1	0	0	0
	0	0	0	0.1	0.1	0.1	0.1	0.1	0.1	0.1	0.1	0.1
	0.1	0.1	0.1	0	0	0	0.1	0.1	0.1	0.1	0.1	0.1
	0.1	0.1	0.1	0.1	0.1	0.1	0.2	0.2	0.2	0.1	0.1	0.1
	0.1	0.1	0.1	0	0	0	0.2	0.2	0.2	0.1	0.1	0.1
	0	0	0	0	0	0	0.1	0.1	0.1	0.1	0.1	0.1
	0.1	0.1	0.1	0.1	0.1	0.1	0.1	0.1	0.1	0	0	0
	0.1	0.1	0.1	0.1	0.1	0.1	0.1	0.1	0.1	0.1	0.1	0.1
	0	0	0	0	0	0	0.1	0.1	0.1	0	0	0
	0.1	0.1	0.1	0	0	0	0.1	0.1	0.1	0	0	0
	0	0	0	0.1	0.1	0.1	0.1	0.1	0.1	0	0	0
	0	0	0	0.1	0.1	0.1	0.1	0.1	0.1	0.1	0.1	0.1
	0.1	0.1	0.1	0.1	0.1	0.1	0.1	0.1	0.1	0.1	0.1	0.1
	0.1	0.1	0.1	0	0	0	0.1	0.1	0.1	0.1	0.1	0.1
	0.1	0.1	0.1	0	0	0	0.1	0.1	0.1	0.1	0.1	0.1
	0.1	0.1	0.1	0.1	0.1	0.1	0.1	0.1	0.1	0.1	0.1	0.1
	0	0	0	0.1	0.1	0.1	0.1	0.1	0.1	0.1	0.1	0.1
	0.1	0.1	0.1	0.1	0.1	0.1	0.1	0.1	0.1	0.1	0.1	0.1
	0	0	0	0.4	0.4	0.1	0.1	0.1	0.1	0.1	0.1	0.1
	0	0	0	0	0	0	0.2	0.2	0.2	0	0	0
	0.1	0.1	0.1	0.1	0.1	0.1	0.1	0.1	0.1	0.1	0.1	0.1
	0	0	0	0.1	0.1	0.1	0.1	0.1	0.1	0	0	0
	0.1	0.1	0.1	0.1	0.1	0.1	0.1	0.1	0.1	0.1	0.1	0.1
	0	0	0	0	0	0	0.1	0.1	0.1	0.1	0.1	0.1
	0.1	0.1	0.1	0.1	0.1	0.1	0.1	0.1	0.1	0.1	0.1	0.1
	0.1	0.1	0.1	0.1	0.1	0.1	0.1	0.1	0.1	0.1	0.1	0.1
	0	0	0	0	0	0	0.1	0.1	0.1	0.1	0.1	0.1
	0.1	0.1	0.1	0	0	0	0.2	0.2	0.2	0	0	0
	0.1	0.1	0.1	0.1	0.1	0.1	0.2	0.2	0.2	0.1	0.1	0.1
	0	0	0	0	0	0	0.1	0.1	0.1	0.1	0.1	0.1
	0	0	0	0	0	0	0.1	0.1	0.1	0.1	0.1	0.1
	0.1	0.1	0.1	0.1	0.1	0.1	0.2	0.2	0.2	0.1	0.1	0.1
	0	0	0	0.1	0.1	0.1	0.1	0.1	0.1	0.1	0.1	0.1
	0	0	0	0.1	0.1	0.1	0.1	0.1	0.1	0	0	0
	0.1	0.1	0.1	0.1	0.1	0.1	0.1	0.1	0.1	0.1	0.1	0.1
	0	0	0	0.1	0.1	0.1	0.2	0.2	0.2	0.1	0.1	0.1
	0.1	0.1	0.1	0.1	0.1	0.1	0.1	0.1	0.1	0.1	0.1	0.1
	0.1	0.1	0.1	0.1	0.1	0.1	0.1	0.1	0.1	0.1	0.1	0.1
	0.1	0.1	0.1	0.1	0.1	0.1	0.2	0.2	0.2	0	0	0
	0.1	0.1	0.1	0.1	0.1	0.1	0.1	0.1	0.1	0.1	0.1	0.1
	0.1	0.1	0.1	0	0	0	0.1	0.1	0.1	0.1	0.1	0.1
	0.1	0.1	0.1	0	0	0	0.1	0.1	0.1	0.1	0.1	0.1
	0	0	0	0.1	0.1	0.1	0.1	0.1	0.1	0.1	0.1	0.1
	0.1	0.1	0.1	0	0	0	0.1	0.1	0.1	0.1	0.1	0.1
	0	0	0	0	0	0	0.1	0.1	0.1	0.1	0.1	0.1
	0.1	0.1	0.1	0.1	0.1	0.1	0.2	0.2	0.2	0.1	0.1	0.1
	0.1	0.1	0.1	0	0	0	0.1	0.1	0.1	0.1	0.1	0.1
	0	0	0	0.1	0.1	0.1	0.1	0.1	0.1	0.1	0.1	0.1
	0.1	0.1	0.1	0.1	0.1	0.1	0.1	0.1	0.1	0.1	0.1	0.1
	0	0	0	0.1	0.1	0.1	0.2	0.2	0.2	0.1	0.1	0.1
	0	0	0	0.1	0.1	0.1	0.1	0.1	0.1	0.1	0.1	0.1
	0.1	0.1	0.1	0	0	0	0.1	0.1	0.1	0	0	0
	0	0	0	0.1	0.1	0.1	0.1	0.1	0.1	0.1	0.1	0.1
	0	0	0	0	0	0	0.1	0.1	0.1	0.1	0.1	0.1
	0	0	0	0	0	0	0.2	0.2	0.2	0.1	0.1	0.1
	0	0	0	0.1	0.1	0.1	0.2	0.2	0.2	0.1	0.1	0.1
	0.1	0.1	0.1	0	0	0	0.1	0.1	0.1	0.1	0.1	0.1
	0.1	0.1	0.1	0	0	0	0.2	0.2	0.1	0.1	0.1	0.1
	0.1	0.1	0.1	0	0	0	0.1	0.1	0.1	0.1	0.1	0.1
	0.1	0.1	0.1	0.1	0.1	0.1	0.1	0.1	0.1	0	0	0
	0	0	0	0	0	0	0.1	0.1	0.1	0.1	0.1	0.1
	0.1	0.1	0.1	0	0	0	0.1	0.1	0.1	0.1	0.1	0.1
	0	0	0	0	0	0	0.1	0.1	0.1	0	0	0
	0.1	0.1	0.1	0.1	0.1	0.1	0.1	0.1	0.1	0.1	0.1	0.1
	0.1	0.1	0.1	0.1	0.1	0.1	0.1	0.1	0.1	0.1	0.1	0.1
	0	0	0	0.1	0.1	0.1	0.2	0.2	0.2	0.1	0.1	0.1
	0.1	0.1	0.1	0.1	0.1	0.1	0.1	0.1	0.1	0	0	0
	0.1	0.1	0.1	0	0	0	0.1	0.1	0.1	0.1	0.1	0.1
	0	0	0	0	0	0	0.1	0.1	0.1	0	0	0
	0.1	0.1	0.1	0.1	0.1	0.1	0.1	0.1	0.1	0.1	0.1	0.1
	0.1	0.1	0.1	0	0	0	0.1	0.1	0.1	0.1	0.1	0.1
	0	0	0	0	0	0	0.1	0.1	0.1	0	0	0
	0	0	0	0.1	0.1	0.1	0.1	0.1	0.1	0.1	0.1	0.1
	0.1	0.1	0.1	0.1	0.1	0.1	0.2	0.2	0.2	0.1	0.1	0.1
	0	0	0	0	0	0	0.1	0.1	0.1	0	0	0
	0	0	0	0	0	0	0.1	0.1	0.1	0.1	0.1	0.1
	0	0	0	0	0	0	0.2	0.2	0.2	0.1	0.1	0.1
	0.1	0.1	0.1	0	0	0	0.1	0.1	0.1	0.1	0.1	0.1
	0	0	0	0	0	0	0.1	0.1	0.1	0.1	0.1	0.1
	0.1	0.1	0.1	0	0	0	0.1	0.1	0.1	0.1	0.1	0.1
	0.1	0.1	0.1	0.1	0.1	0.1	0.1	0.1	0.1	0.1	0.1	0.1
	0.1	0.1	0.1	0.1	0.1	0.1	0.1	0.1	0.1	0	0	0
	0.1	0.1	0.1	0.1	0.1	0.1	0.1	0.1	0.1	0.1	0.1	0.1
	0.1	0.1	0.1	0	0	0	0.1	0.1	0.1	0.1	0.1	0.1
	0	0	0	0.1	0.1	0.1	0.1	0.1	0.1	0.1	0.1	0.1
	0.1	0.1	0.1	1	0.6	0.1	0.2	0.2	0.2	0.1	0.1	0.1
	0	0	0	0.1	0.1	0.1	0.1	0.1	0.1	0.1	0.1	0.1
	0.1	0.1	0.1	0	0	0	0.1	0.1	0.1	0.1	0.1	0.1
	0.1	0.1	0.1	0.1	0.1	0.1	0.1	0.1	0.1	0.1	0.1	0.1
	0.1	0.1	0.1	0.1	0.1	0.1	0.1	0.1	0.1	0.1	0.1	0.1
	0.1	0.1	0.1	0.1	0.1	0.1	0.1	0.1	0.1	0.1	0.1	0.1
	0	0	0	0.1	0.1	0.1	0.1	0.1	0.1	0.1	0.1	0.1
	0.1	0.1	0.1	0.1	0.1	0.1	0.1	0.1	0.1	0	0	0
	0.1	0.1	0.1	0.1	0.1	0.1	0.1	0.1	0.1	0.1	0.1	0.1
	0.1	0.1	0.1	0.1	0.1	0.1	0.1	0.1	0.1	0.1	0.1	0.1
	0	0	0	0	0	0	0.2	0.2	0.2	0.1	0.1	0.1
	0.1	0.1	0.1	0.1	0.1	0.1	0.1	0.1	0.1	0	0	0
	0	0	0	0	0	0	0.2	0.2	0.2	0.1	0.1	0.1
	0	0	0	0.1	0.1	0.1	0.1	0.1	0.1	0	0	0
	0.1	0.1	0.1	0.1	0.1	0.1	0.2	0.2	0.2	0.1	0.1	0.1
	0.1	0.1	0.1	0	0	0	0.1	0.1	0.1	0.1	0.1	0.1
	0	0	0	0.1	0.1	0.1	0.1	0.1	0.1	0.1	0.1	0.1
	0.1	0.1	0.1	0	0	0	0.1	0.1	0.1	0.1	0.1	0.1
	0	0	0	0.1	0.1	0.1	0.1	0.1	0.1	0.1	0.1	0.1
	0	0	0	0.1	0.1	0.1	0.1	0.1	0.1	0.1	0.1	0.1
	0.4	0.4	0.1	0	0	0	0.1	0.1	0.1	0.1	0.1	0.1
	0.1	0.1	0.1	0	0	0	0.1	0.1	0.1	0.1	0.1	0.1
	0.1	0.1	0.1	0.1	0.1	0.1	0.1	0.1	0.1	0.1	0.1	0.1
	0.1	0.1	0.1	0	0	0	0.1	0.1	0.1	0.1	0.1	0.1
	0	0	0	0.1	0.1	0.1	0.1	0.1	0.1	0.1	0.1	0.1
	0	0	0	0	0	0	0.2	0.2	0.2	0.1	0.1	0.1
	0	0	0	0.1	0.1	0.1	0.2	0.2	0.2	0.1	0.1	0.1
	0.1	0.1	0.1	0.1	0.1	0.1	0.1	0.1	0.1	0.3	0.3	0.2
	0.1	0.1	0.1	0	0	0	0.1	0.1	0.1	0	0	0
	0.1	0.1	0.1	0.1	0.1	0.1	0.1	0.1	0.1	0.1	0.1	0.1
	0.1	0.1	0.1	0.1	0.1	0.1	0.1	0.1	0.1	0.1	0.1	0.1
	0.1	0.1	0.1	0.1	0.1	0.1	0.1	0.1	0.1	0.1	0.1	0.1
	0.1	0.1	0.1	0.1	0.1	0.1	0.1	0.1	0.1	0.1	0.1	0.1
	0.1	0.1	0.1	0	0	0	0.1	0.1	0.1	0.1	0.1	0.1
	0	0	0	0	0	0	0.1	0.1	0.1	0	0	0
	0.1	0.1	0.1	0.1	0.1	0.1	0.1	0.1	0.1	0.1	0.1	0.1
	0.1	0.1	0.1	0	0	0	0.1	0.1	0.1	0.1	0.1	0.1
	0	0	0	0.1	0.1	0.1	0.1	0.1	0.1	0.1	0.1	0.1
	0	0	0	0.1	0.1	0.1	0.1	0.1	0.1	0.1	0.1	0.1
	0.1	0.1	0.1	0.1	0.1	0.1	0.1	0.1	0.1	0.1	0.1	0.1
	0	0	0	0.1	0.1	0.1	0.1	0.1	0.1	0.1	0.1	0.1
	0.1	0.1	0.1	0.1	0.1	0.1	0.1	0.1	0.1	0.1	0.1	0.1
	0.1	0.1	0.1	0	0	0	0.1	0.1	0.1	0.1	0.1	0.1
	0	0	0	0.1	0.1	0.1	0.2	0.2	0.2	0.1	0.1	0.1
	0	0	0	0.1	0.1	0.1	0.1	0.1	0.1	0.1	0.1	0.1
	0.1	0.1	0.1	0	0	0	0.1	0.1	0.1	0.1	0.1	0.1
	0.1	0.1	0.1	0.1	0.1	0.1	0.1	0.1	0.1	0.1	0.1	0.1
	0.1	0.1	0.1	0.1	0.1	0.1	0.2	0.2	0.2	0.1	0.1	0.1
	0.1	0.1	0.1	0	0	0	0	0	0	0.1	0.1	0.1
	0.1	0.1	0.1	0.1	0.1	0.1	0.1	0.1	0.1	0.1	0.1	0.1
	0.1	0.1	0.1	0	0	0	0.2	0.2	0.2	0.1	0.1	0.1
	0	0	0	0	0	0	0.1	0.1	0.1	0.1	0.1	0.1
	0.1	0.1	0.1	0	0	0	0.1	0.1	0.1	0.1	0.1	0.1
	0.1	0.1	0.1	0.1	0.1	0.1	0.1	0.1	0.1	0	0	0
	0.1	0.1	0.1	0.1	0.1	0.1	0.1	0.1	0.1	0.1	0.1	0.1
	0	0	0	0.1	0.1	0.1	0.1	0.1	0.1	0.1	0.1	0.1
	0.1	0.1	0.1	0.1	0.1	0.1	0.2	0.2	0.2	0.1	0.1	0.1
	0	0	0	0.1	0.1	0.1	0.1	0.1	0.1	0	0	0
	0.1	0.1	0.1	0	0	0	0.1	0.1	0.1	0.1	0.1	0.1
	0.1	0.1	0.1	0.1	0.1	0.1	0.1	0.1	0.1	0.1	0.1	0.1
	0.1	0.1	0.1	0	0	0	0.1	0.1	0.1	0	0	0
	0	0	0	0	0	0	0.1	0.1	0.1	0.1	0.1	0.1
	0.1	0.1	0.1	0	0	0	0.1	0.1	0.1	0.1	0.1	0.1
	0	0	0	0.1	0.1	0.1	0.2	0.2	0.2	0.1	0.1	0.1
	0.1	0.1	0.1	0	0	0	0.1	0.1	0.1	0.1	0.1	0.1
	0	0	0	0	0	0	0.1	0.1	0.1	0.1	0.1	0.1
	0.1	0.1	0.1	0.1	0.1	0.1	0.1	0.1	0.1	0.1	0.1	0.1
	0	0	0	0	0	0	0.1	0.1	0.1	0.1	0.1	0.1
	0.1	0.1	0.1	0.1	0.1	0.1	0.2	0.2	0.2	0.1	0.1	0.1
	0.1	0.1	0.1	0	0	0	0.1	0.1	0.1	0.1	0.1	0.1
	0.1	0.1	0.1	0.1	0.1	0.1	0.1	0.1	0.1	0.1	0.1	0.1
	0.1	0.1	0.1	0.1	0.1	0.1	0.1	0.1	0.1	0.1	0.1	0.1
	0.1	0.1	0.1	0	0	0	0.1	0.1	0.1	0.1	0.1	0.1
	0	0	0	0.1	0.1	0.1	0.1	0.1	0.1	0.1	0.1	0.1
	0	0	0	0.1	0.1	0.1	0.2	0.2	0.2	0.1	0.1	0.1
	0.1	0.1	0.1	0	0	0	0.1	0.1	0.1	0.1	0.1	0.1
	0.1	0.1	0.1	0	0	0	0.1	0.1	0.1	0.1	0.1	0.1
	0.2	0.2	0.1	0.1	0.1	0.1	0.1	0.1	0.1	0.1	0.1	0.1
	0	0	0	0.1	0.1	0.1	0.1	0.1	0.1	0.1	0.1	0.1
	0.1	0.1	0.1	0	0	0	0.2	0.2	0.2	0.1	0.1	0.1
	0.1	0.1	0.1	0.1	0.1	0.1	0.1	0.1	0.1	0.1	0.1	0.1
	0.1	0.1	0.1	0.1	0.1	0.1	0.1	0.1	0.1	0	0	0
	0	0	0	0.1	0.1	0.1	0.1	0.1	0.1	0.1	0.1	0.1
	0.1	0.1	0.1	0.1	0.1	0.1	0.1	0.1	0.1	0	0	0
	0.1	0.1	0.1	0.1	0.1	0.1	0.1	0.1	0.1	0.1	0.1	0.1
	0	0	0	0.1	0.1	0.1	0.1	0.1	0.1	0.1	0.1	0.1
	0.1	0.1	0.1	0	0	0	0.1	0.1	0.1	0.1	0.1	0.1
	0.1	0.1	0.1	0.1	0.1	0.1	0.1	0.1	0.1	0	0	0
	0.1	0.1	0.1	0.1	0.1	0.1	0.1	0.1	0.1	0.1	0.1	0.1
	0	0	0	0.1	0.1	0.1	0.1	0.1	0.1	0.1	0.1	0.1
	0.1	0.1	0.1	0	0	0	0.1	0.1	0.1	0.1	0.1	0.1
	0	0	0	0.1	0.1	0.1	0.1	0.1	0.1	0.1	0.1	0.1
	0.1	0.1	0.1	0.1	0.1	0.1	0.1	0.1	0.1	0.1	0.1	0.1
	0.1	0.1	0.1	0	0	0	0.1	0.1	0.1	0.1	0.1	0.1
	0	0	0	0.1	0.1	0.1	0.1	0.1	0.1	0.1	0.1	0.1
	0.1	0.1	0.1	0.1	0.1	0.1	0.1	0.1	0.1	0.1	0.1	0.1
	0.1	0.1	0.1	0.1	0.1	0.1	0.1	0.1	0.1	0	0	0
	0.1	0.1	0.1	0	0	0	0.1	0.1	0.1	0.1	0.1	0.1
	0.1	0.1	0.1	0.1	0.1	0.1	0.1	0.1	0.1	0.1	0.1	0.1
	0.1	0.1	0.1	0	0	0	0.2	0.2	0.2	0.1	0.1	0.1
	0.1	0.1	0.1	0.1	0.1	0.1	0.1	0.1	0.1	0.1	0.1	0.1
	0.1	0.1	0.1	0.1	0.1	0.1	0.1	0.1	0.1	0.1	0.1	0.1
	0	0	0	0.1	0.1	0.1	0.1	0.1	0.1	0.1	0.1	0.1
	0.1	0.1	0.1	0.1	0.1	0.1	0.2	0.2	0.2	0.1	0.1	0.1
	0	0	0	0.1	0.1	0.1	0.1	0.1	0.1	0.1	0.1	0.1
	0.1	0.1	0.1	0	0	0	0.1	0.1	0.1	0.1	0.1	0.1
	0.1	0.1	0.1	0.1	0.1	0.1	0	0	0	0.1	0.1	0.1
	0.1	0.1	0.1	0.1	0.1	0.1	0.2	0.2	0.2	0.1	0.1	0.1
	0.1	0.1	0.1	0.1	0.1	0.1	0.1	0.1	0.1	0.1	0.1	0.1
	0.1	0.1	0.1	0.1	0.1	0.1	0.1	0.1	0.1	0.1	0.1	0.1
	0	0	0	0.1	0.1	0.1	0.2	0.2	0.2	0.1	0.1	0.1
	0.1	0.1	0.1	0.1	0.1	0.1	0.2	0.2	0.2	0.1	0.1	0.1
	0	0	0	0.1	0.1	0.1	0.1	0.1	0.1	0.1	0.1	0.1
	0.2	0.2	0.1	0.1	0.1	0.1	0.1	0.1	0.1	0.1	0.1	0.1
	0.1	0.1	0.1	0.1	0.1	0.1	0.1	0.1	0.1	0.1	0.1	0.1
	0.1	0.1	0.1	0.1	0.1	0.1	0.1	0.1	0.1	0.1	0.1	0.1
	0.1	0.1	0.1	0.1	0.1	0.1	0.1	0.1	0.1	0.1	0.1	0.1
	0.1	0.1	0.1	0.1	0.1	0.1	0.1	0.1	0.1	0.1	0.1	0.1
	0.1	0.1	0.1	0.1	0.1	0.1	0.2	0.2	0.2	0.1	0.1	0.1
	0.1	0.1	0.1	0	0	0	0.1	0.1	0.1	0.1	0.1	0.1
	0.1	0.1	0.1	0.1	0.1	0.1	0.1	0.1	0.1	0.1	0.1	0.1
	0.1	0.1	0.1	0	0	0	0.2	0.2	0.2	0.1	0.1	0.1
	0	0	0	0	0	0	0.2	0.2	0.2	0	0	0
	0.1	0.1	0.1	0.1	0.1	0.1	0.1	0.1	0.1	0.1	0.1	0.1
	0	0	0	0.1	0.1	0.1	0.1	0.1	0.1	0.1	0.1	0.1
	0	0	0	0	0	0	0.1	0.1	0.1	0.1	0.1	0.1
	0.1	0.1	0.1	0.1	0.1	0.1	0.1	0.1	0.1	0.1	0.1	0.1
	0	0	0	0.1	0.1	0.1	0.2	0.2	0.2	0.1	0.1	0.1
	0.1	0.1	0.1	0.1	0.1	0.1	0.1	0.1	0.1	0.1	0.1	0.1
	0	0	0	0	0	0	0.1	0.1	0.1	0.1	0.1	0.1
	0.1	0.1	0.1	0.1	0.1	0.1	0.1	0.1	0.1	0.1	0.1	0.1
	0.1	0.1	0.1	0.1	0.1	0.1	0.1	0.1	0.1	0	0	0
	0.1	0.1	0.1	0	0	0	0.2	0.2	0.2	0.1	0.1	0.1
	0.1	0.1	0.1	0.1	0.1	0.1	0.1	0.1	0.1	0.1	0.1	0.1
	0.1	0.1	0.1	0.1	0.1	0.1	0.1	0.1	0.1	0.1	0.1	0.1
	0.1	0.1	0.1	0	0	0	0.1	0.1	0.1	0.1	0.1	0.1
	0.1	0.1	0.1	0.1	0.1	0.1	0.1	0.1	0.1	0.1	0.1	0.1
	0	0	0	0.1	0.1	0.1	0.1	0.1	0.1	0.1	0.1	0.1
	0	0	0	0.1	0.1	0.1	0.1	0.1	0.1	0.1	0.1	0.1
	0	0	0	0.1	0.1	0.1	0.1	0.1	0.1	0.1	0.1	0.1
	0	0	0	0.1	0.1	0.1	0.1	0.1	0.1	0.1	0.1	0.1
	0.1	0.1	0.1	0.1	0.1	0.1	0.2	0.2	0.2	0.1	0.1	0.1
	0.1	0.1	0.1	0.1	0.1	0.1	0.2	0.2	0.2	0.1	0.1	0.1
	0.1	0.1	0.1	0.1	0.1	0.1	0.1	0.1	0.1	0.1	0.1	0.1
	0.1	0.1	0.1	0	0	0	0.2	0.2	0.2	0	0	0
	0	0	0	0	0	0	0.1	0.1	0.1	0.1	0.1	0.1
	0.1	0.1	0.1	0	0	0	0.1	0.1	0.1	0.1	0.1	0.1
	0.1	0.1	0.1	0.1	0.1	0.1	0.1	0.1	0.1	0.1	0.1	0.1
	0.1	0.1	0.1	0.1	0.1	0.1	0.1	0.1	0.1	0	0	0
	0	0	0	0.1	0.1	0.1	0.1	0.1	0.1	0.1	0.1	0.1
	0.1	0.1	0.1	0	0	0	0.1	0.1	0.1	0.1	0.1	0.1
	0.1	0.1	0.1	0.1	0.1	0.1	0.2	0.2	0.2	0.1	0.1	0.1
	0.1	0.1	0.1	0.1	0.1	0.1	0.1	0.1	0.1	0.1	0.1	0.1
	0.1	0.1	0.1	0.1	0.1	0.1	0.1	0.1	0.1	0.1	0.1	0.1
	0.1	0.1	0.1	0	0	0	0.1	0.1	0.1	0.1	0.1	0.1
	0.1	0.1	0.1	0	0	0	0.1	0.1	0.1	0.1	0.1	0.1
	0	0	0	0.1	0.1	0.1	0.2	0.2	0.2	0	0	0
	0.1	0.1	0.1	0.1	0.1	0.1	0.1	0.1	0.1	0.1	0.1	0.1
	0.1	0.1	0.1	0.1	0.1	0.1	0.1	0.1	0.1	0.1	0.1	0.1
	0	0	0	0.1	0.1	0.1	0.1	0.1	0.1	0.1	0.1	0.1
	0.1	0.1	0.1	0.1	0.1	0.1	0.1	0.1	0.1	0.2	0.2	0.2
	0.1	0.1	0.1	0	0	0	0.1	0.1	0.1	0.2	0.2	0.2
	0.1	0.1	0.1	0.1	0.1	0.1	0.1	0.1	0.1	0.1	0.1	0.1
	0.1	0.1	0.1	0.1	0.1	0.1	0.1	0.1	0.1	0.1	0.1	0.1
	0	0	0	0	0	0	0.1	0.1	0.1	0.1	0.1	0.1
	0.1	0.1	0.1	0.1	0.1	0.1	0.1	0.1	0.1	0.1	0.1	0.1
	0.1	0.1	0.1	0	0	0	0.1	0.1	0.1	0.1	0.1	0.1
	0.1	0.1	0.1	0	0	0	0.1	0.1	0.1	0.1	0.1	0.1
	0.1	0.1	0.1	0	0	0	0.1	0.1	0.1	0.1	0.1	0.1
	0.1	0.1	0.1	0.1	0.1	0.1	0.1	0.1	0.1	0	0	0
	0	0	0	0.1	0.1	0.1	0.1	0.1	0.1	0.1	0.1	0.1
	0.1	0.1	0.1	0.1	0.1	0.1	0.1	0.1	0.1	0.1	0.1	0.1
	0.1	0.1	0.1	0.1	0.1	0.1	0.1	0.1	0.1	0.1	0.1	0.1
	0.1	0.1	0.1	0.1	0.1	0.1	0.1	0.1	0.1	0.1	0.1	0.1
	0	0	0	0	0	0	0.1	0.1	0.1	0.1	0.1	0.1
	0.1	0.1	0.1	0	0	0	0.1	0.1	0.1	0.1	0.1	0.1
	0.1	0.1	0.1	0	0	0	0.1	0.1	0.1	0.1	0.1	0.1
	0	0	0	0.1	0.1	0.1	0.1	0.1	0.1	0.1	0.1	0.1
	0.1	0.1	0.1	0.1	0.1	0.1	0.1	0.1	0.1	0.1	0.1	0.1
	0.1	0.1	0.1	0.1	0.1	0.1	0.1	0.1	0.1	0.1	0.1	0.1
	0.1	0.1	0.1	0	0	0	0.1	0.1	0.1	0.1	0.1	0.1
	0.1	0.1	0.1	0.1	0.1	0.1	0.1	0.1	0.1	0.1	0.1	0.1
	0	0	0	0.1	0.1	0.1	0.1	0.1	0.1	0.1	0.1	0.1
	0.1	0.1	0.1	0.1	0.1	0.1	0.1	0.1	0.1	0.1	0.1	0.1
	0	0	0	0.1	0.1	0.1	0.2	0.2	0.2	0.1	0.1	0.1
	0.1	0.1	0.1	0.1	0.1	0.1	0.2	0.2	0.2	0.1	0.1	0.1
	0.1	0.1	0.1	0.1	0.1	0.1	0.3	0.3	0.1	0.1	0.1	0.1
	0.1	0.1	0.1	0	0	0	0.2	0.2	0.2	0.1	0.1	0.1
	0	0	0	0.1	0.1	0.1	0.1	0.1	0.1	0.1	0.1	0.1
	0.1	0.1	0.1	0.1	0.1	0.1	0.3	0.3	0.1	0	0	0
	0.1	0.1	0.1	0.1	0.1	0.1	0.1	0.1	0.1	0.1	0.1	0.1
	0	0	0	0.1	0.1	0.1	0.1	0.1	0.1	0.1	0.1	0.1
	0.1	0.1	0.1	0	0	0	0.1	0.1	0.1	0.1	0.1	0.1
	0.1	0.1	0.1	0	0	0	0.1	0.1	0.1	0.1	0.1	0.1
	0.1	0.1	0.1	0	0	0	0.2	0.2	0.2	0.1	0.1	0.1
	0.1	0.1	0.1	0.1	0.1	0.1	0.2	0.2	0.2	0.1	0.1	0.1
	0	0	0	0.1	0.1	0.1	0.1	0.1	0.1	0.1	0.1	0.1
	0.1	0.1	0.1	0.1	0.1	0.1	0.1	0.1	0.1	0.1	0.1	0.1
	0.1	0.1	0.1	0	0	0	0.1	0.1	0.1	0	0	0
	0.1	0.1	0.1	0.1	0.1	0.1	0.1	0.1	0.1	0.1	0.1	0.1
	0.1	0.1	0.1	0.1	0.1	0.1	0.1	0.1	0.1	0.1	0.1	0.1
	0	0	0	0	0	0	0.1	0.1	0.1	0.1	0.1	0.1
	0.1	0.1	0.1	0	0	0	0.1	0.1	0.1	0.1	0.1	0.1
	0.1	0.1	0.1	0.1	0.1	0.1	0.2	0.2	0.2	0.1	0.1	0.1
	0	0	0	0.1	0.1	0.1	0.1	0.1	0.1	0.1	0.1	0.1
	0.1	0.1	0.1	0.1	0.1	0.1	0.1	0.1	0.1	0.1	0.1	0.1
	0.1	0.1	0.1	0.1	0.1	0.1	0.1	0.1	0.1	0.1	0.1	0.1
	0	0	0	0.1	0.1	0.1	0.1	0.1	0.1	0.1	0.1	0.1
	0	0	0	0	0	0	0.1	0.1	0.1	0.1	0.1	0.1
	0	0	0	0.1	0.1	0.1	0.1	0.1	0.1	0.1	0.1	0.1
	0.1	0.1	0.1	0	0	0	0.1	0.1	0.1	0.1	0.1	0.1
	0	0	0	0.1	0.1	0.1	0.1	0.1	0.1	0.1	0.1	0.1
	0.1	0.1	0.1	0	0	0	0.1	0.1	0.1	0.1	0.1	0.1
	0.1	0.1	0.1	0	0	0	0.2	0.2	0.2	0.1	0.1	0.1
	0.1	0.1	0.1	0.1	0.1	0.1	0.2	0.2	0.2	0.1	0.1	0.1
	0	0	0	0.1	0.1	0.1	0.1	0.1	0.1	0.1	0.1	0.1
	0.7	0.6	0.1	0.1	0.1	0.1	0.1	0.1	0.1	0.1	0.1	0.1
	0	0	0	0.1	0.1	0.1	0.2	0.2	0.2	0.1	0.1	0.1
	0.1	0.1	0.1	0	0	0	0.1	0.1	0.1	0	0	0
	0.1	0.1	0.1	0.1	0.1	0.1	0.1	0.1	0.1	0.1	0.1	0.1
	0.1	0.1	0.1	0	0	0	0.1	0.1	0.1	0.1	0.1	0.1
	0	0	0	0.1	0.1	0.1	0.1	0.1	0.1	0.1	0.1	0.1
	0	0	0	0.1	0.1	0.1	0.1	0.1	0.1	0.1	0.1	0.1
	0.1	0.1	0.1	0.1	0.1	0.1	0.1	0.1	0.1	0.1	0.1	0.1
	0.1	0.1	0.1	0.1	0.1	0.1	0.1	0.1	0.1	0.1	0.1	0.1
	0.1	0.1	0.1	0.2	0.2	0.1	0.1	0.1	0.1	0.1	0.1	0.1
	0.1	0.1	0.1	0.1	0.1	0.1	0.1	0.1	0.1	0.1	0.1	0.1
	0	0	0	0.9	0.6	0.1	0.1	0.1	0.1	0.1	0.1	0.1
	0	0	0	0.1	0.1	0.1	0.1	0.1	0.1	0.1	0.1	0.1
	0.1	0.1	0.1	0.1	0.1	0.1	0.1	0.1	0.1	0	0	0
	0.1	0.1	0.1	0.1	0.1	0.1	0.1	0.1	0.1	0.1	0.1	0.1
	0.1	0.1	0.1	0	0	0	0.1	0.1	0.1	0.1	0.1	0.1
	0.1	0.1	0.1	0	0	0	0.1	0.1	0.1	0	0	0
	0.1	0.1	0.1	0	0	0	0.1	0.1	0.1	0.1	0.1	0.1
	0	0	0	0.1	0.1	0.1	0.1	0.1	0.1	0.1	0.1	0.1
	0.1	0.1	0.1	0.1	0.1	0.1	0.1	0.1	0.1	0.1	0.1	0.1
	0	0	0	0	0	0	0.1	0.1	0.1	0.1	0.1	0.1
	0	0	0	0.1	0.1	0.1	0.1	0.1	0.1	0.1	0.1	0.1
	0	0	0	0.1	0.1	0.1	0.1	0.1	0.1	0.1	0.1	0.1
	0.1	0.1	0.1	0.1	0.1	0.1	0.2	0.2	0.2	0.1	0.1	0.1
	0	0	0	0	0	0	0.1	0.1	0.1	0.1	0.1	0.1
	0	0	0	0.1	0.1	0.1	0.1	0.1	0.1	0.1	0.1	0.1
	0.1	0.1	0.1	0.1	0.1	0.1	0.1	0.1	0.1	0.1	0.1	0.1
	0.1	0.1	0.1	0.1	0.1	0.1	0.1	0.1	0.1	0.1	0.1	0.1
	0	0	0	0.1	0.1	0.1	0.2	0.2	0.2	0.1	0.1	0.1
	0.1	0.1	0.1	0	0	0	0.1	0.1	0.1	0.1	0.1	0.1
	0.1	0.1	0.1	0.1	0.1	0.1	0.1	0.1	0.1	0.1	0.1	0.1
	0	0	0	0.1	0.1	0.1	0.1	0.1	0.1	0.1	0.1	0.1
	0.1	0.1	0.1	0.1	0.1	0.1	0.1	0.1	0.1	0.1	0.1	0.1
	0.1	0.1	0.1	0.1	0.1	0.1	0.1	0.1	0.1	0.1	0.1	0.1
	0.1	0.1	0.1	0.1	0.1	0.1	0.1	0.1	0.1	0.1	0.1	0.1
	0.1	0.1	0.1	0	0	0	0.1	0.1	0.1	0.1	0.1	0.1
	0.1	0.1	0.1	0	0	0	0.2	0.2	0.2	0.1	0.1	0.1
	0.1	0.1	0.1	0.1	0.1	0.1	0.1	0.1	0.1	0.1	0.1	0.1
	0.1	0.1	0.1	0	0	0	0.1	0.1	0.1	0.1	0.1	0.1
	0	0	0	0	0	0	0.1	0.1	0.1	0.1	0.1	0.1
	0	0	0	0.1	0.1	0.1	0.1	0.1	0.1	0.1	0.1	0.1
	0	0	0	0.1	0.1	0.1	0.1	0.1	0.1	0.1	0.1	0.1
	0.1	0.1	0.1	0.1	0.1	0.1	0.1	0.1	0.1	0.1	0.1	0.1
	0	0	0	0.1	0.1	0.1	0.1	0.1	0.1	0.1	0.1	0.1
	0	0	0	0	0	0	0.1	0.1	0.1	0.1	0.1	0.1
	0	0	0	0.1	0.1	0.1	0.1	0.1	0.1	0.1	0.1	0.1
	0.1	0.1	0.1	0	0	0	0.1	0.1	0.1	0.1	0.1	0.1
	0.1	0.1	0.1	0.1	0.1	0.1	0.1	0.1	0.1	0.1	0.1	0.1
	0.1	0.1	0.1	1	0.7	0.1	0.1	0.1	0.1	0.1	0.1	0.1
	0	0	0	0	0	0	0.1	0.1	0.1	0.1	0.1	0.1
	0.1	0.1	0.1	0	0	0	0.1	0.1	0.1	0.1	0.1	0.1
	0	0	0	0.1	0.1	0.1	0.1	0.1	0.1	0.1	0.1	0.1
	0.1	0.1	0.1	0.1	0.1	0.1	0.1	0.1	0.1	0.1	0.1	0.1
	0.2	0.2	0.1	0.1	0.1	0.1	0.1	0.1	0.1	0.1	0.1	0.1
	0.1	0.1	0.1	0	0	0	0.1	0.1	0.1	0.1	0.1	0.1
	0	0	0	0.1	0.1	0.1	0.1	0.1	0.1	0	0	0
	0.1	0.1	0.1	0.1	0.1	0.1	0.1	0.1	0.1	0.1	0.1	0.1
	0	0	0	0.1	0.1	0.1	0.2	0.2	0.2	0.1	0.1	0.1
	0.1	0.1	0.1	0.1	0.1	0.1	0.1	0.1	0.1	0.1	0.1	0.1
	0.1	0.1	0.1	0.1	0.1	0.1	0.1	0.1	0.1	0.1	0.1	0.1
	0.1	0.1	0.1	0.1	0.1	0.1	0.1	0.1	0.1	0.1	0.1	0.1
	0.1	0.1	0.1	0	0	0	0.1	0.1	0.1	0.1	0.1	0.1
	0	0	0	0.1	0.1	0.1	0.1	0.1	0.1	0.1	0.1	0.1
	0	0	0	0.1	0.1	0.1	0.1	0.1	0.1	0.1	0.1	0.1
	0.1	0.1	0.1	0.1	0.1	0.1	0.1	0.1	0.1	0.1	0.1	0.1
	0.1	0.1	0.1	0.1	0.1	0.1	0.1	0.1	0.1	0.1	0.1	0.1
	0	0	0	0	0	0	0.2	0.2	0.2	0.1	0.1	0.1
	0.1	0.1	0.1	0	0	0	0.1	0.1	0.1	0.1	0.1	0.1
	0	0	0	0.1	0.1	0.1	0.2	0.2	0.2	0.1	0.1	0.1
	0	0	0	0.1	0.1	0.1	0.1	0.1	0.1	0.1	0.1	0.1
	0.1	0.1	0.1	0.1	0.1	0.1	0.1	0.1	0.1	0.1	0.1	0.1
	0	0	0	0.1	0.1	0.1	0.1	0.1	0.1	0.1	0.1	0.1
	0	0	0	0.1	0.1	0.1	0	0	0	0.1	0.1	0.1
	0	0	0	0	0	0	0.1	0.1	0.1	0.1	0.1	0.1
	0.1	0.1	0.1	0	0	0	0.1	0.1	0.1	0.1	0.1	0.1
	0.1	0.1	0.1	0	0	0	0.1	0.1	0.1	0.1	0.1	0.1
	0	0	0	0.1	0.1	0.1	0.1	0.1	0.1	0.1	0.1	0.1
	0	0	0	0.1	0.1	0.1	0.1	0.1	0.1	0.1	0.1	0.1
	0.1	0.1	0.1	0.1	0.1	0.1	0.1	0.1	0.1	0.1	0.1	0.1
	0.1	0.1	0.1	0	0	0	0.1	0.1	0.1	0.1	0.1	0.1
	0.1	0.1	0.1	0.1	0.1	0.1	0.1	0.1	0.1	0.1	0.1	0.1
	0	0	0	0	0	0	0.1	0.1	0.1	0.1	0.1	0.1
	0.1	0.1	0.1	0.1	0.1	0.1	0.1	0.1	0.1	0.1	0.1	0.1
	0.1	0.1	0.1	0	0	0	0.1	0.1	0.1	0.1	0.1	0.1
	0.1	0.1	0.1	0.1	0.1	0.1	0.1	0.1	0.1	0.1	0.1	0.1
	0.1	0.1	0.1	0.1	0.1	0.1	0	0	0	0.1	0.1	0.1
	0	0	0	0.1	0.1	0.1	0.1	0.1	0.1	0.1	0.1	0.1
	0.1	0.1	0.1	0.1	0.1	0.1	0.1	0.1	0.1	0.1	0.1	0.1
	0.1	0.1	0.1	0.1	0.1	0.1	0.1	0.1	0.1	0.1	0.1	0.1
	0.1	0.1	0.1	0	0	0	0.1	0.1	0.1	0.1	0.1	0.1
	0	0	0	0.1	0.1	0.1	0.1	0.1	0.1	0.1	0.1	0.1
	0	0	0	0	0	0	0.1	0.1	0.1	0.1	0.1	0.1
	0.1	0.1	0.1	0	0	0	0.1	0.1	0.1	0.1	0.1	0.1
	0.1	0.1	0.1	0	0	0	0.1	0.1	0.1	0.1	0.1	0.1
	0.1	0.1	0.1	0.1	0.1	0.1	0.1	0.1	0.1	0.1	0.1	0.1
	0.1	0.1	0.1	0	0	0	0.1	0.1	0.1	0.1	0.1	0.1
	0.1	0.1	0.1	0	0	0	0.1	0.1	0.1	0.1	0.1	0.1
	0.1	0.1	0.1	0.1	0.1	0.1	0.2	0.2	0.2	0.1	0.1	0.1
	0	0	0	0.1	0.1	0.1	0.1	0.1	0.1	0.1	0.1	0.1
	0	0	0	0.1	0.1	0.1	0.1	0.1	0.1	0.1	0.1	0.1
	0.1	0.1	0.1	0.1	0.1	0.1	0.1	0.1	0.1	0.1	0.1	0.1
	0.1	0.1	0.1	0	0	0	0.1	0.1	0.1	0.1	0.1	0.1
	0.1	0.1	0.1	0.1	0.1	0.1	0.1	0.1	0.1	0.1	0.1	0.1
	0	0	0	0.1	0.1	0.1	0.1	0.1	0.1	0.1	0.1	0.1
	0.1	0.1	0.1	0.1	0.1	0.1	0.1	0.1	0.1	0.1	0.1	0.1
	0.1	0.1	0.1	0.1	0.1	0.1	0.1	0.1	0.1	0.1	0.1	0.1
	0.1	0.1	0.1	0.1	0.1	0.1	0.1	0.1	0.1	0.1	0.1	0.1
	0	0	0	0.1	0.1	0.1	0.1	0.1	0.1	0.1	0.1	0.1
	0.1	0.1	0.1	0.1	0.1	0.1	0.1	0.1	0.1	0.1	0.1	0.1
	0.1	0.1	0.1	0.1	0.1	0.1	0.2	0.2	0.2	0.1	0.1	0.1
	0.1	0.1	0.1	0.1	0.1	0.1	0.1	0.1	0.1	0.1	0.1	0.1
	0	0	0	0.1	0.1	0.1	0.2	0.2	0.2	0.1	0.1	0.1
	0.1	0.1	0.1	0.1	0.1	0.1	0.1	0.1	0.1	0.1	0.1	0.1
	0.1	0.1	0.1	0.1	0.1	0.1	0.1	0.1	0.1	0.1	0.1	0.1
	0	0	0	0.1	0.1	0.1	0.1	0.1	0.1	0	0	0
	0.1	0.1	0.1	0.1	0.1	0.1	0.1	0.1	0.1	0.1	0.1	0.1
	0	0	0	0	0	0	0.2	0.2	0.2	0.1	0.1	0.1
	0.1	0.1	0.1	0.1	0.1	0.1	0.3	0.3	0.3	0.1	0.1	0.1
	0.1	0.1	0.1	0.1	0.1	0.1	0.3	0.3	0.3	0.1	0.1	0.1
	0.1	0.1	0.1	0	0	0	0.3	0.3	0.3	0.1	0.1	0.1
	0.2	0.2	0.2	0.1	0.1	0.1	0.3	0.3	0.3	0.1	0.1	0.1
	0.1	0.1	0.1	0.1	0.1	0.1	0.2	0.2	0.2	0.1	0.1	0.1
	0.1	0.1	0.1	0	0	0	0.2	0.2	0.2	0.1	0.1	0.1
	0.1	0.1	0.1	0	0	0	0.2	0.2	0.2	0.1	0.1	0.1
	0.1	0.1	0.1	0.1	0.1	0.1	0.2	0.2	0.2	0.1	0.1	0.1
	0.2	0.2	0.2	0.1	0.1	0.1	0.2	0.2	0.2	0.1	0.1	0.1
	0.1	0.1	0.1	0.1	0.1	0.1	0.2	0.2	0.2	0.1	0.1	0.1
	0.1	0.1	0.1	0	0	0	0.1	0.1	0.1	0	0	0
	0.1	0.1	0.1	0.1	0.1	0.1	0.8	0.6	0.1	0.1	0.1	0.1
	0.1	0.1	0.1	0.1	0.1	0.1	0.3	0.3	0.2	0.1	0.1	0.1
	0.1	0.1	0.1	0	0	0	0.1	0.1	0.1	0.1	0.1	0.1
	0.1	0.1	0.1	0.1	0.1	0.1	0.2	0.2	0.2	0.1	0.1	0.1
	0.1	0.1	0.1	0.1	0.1	0.1	0.1	0.1	0.1	0	0	0
	0	0	0	0.1	0.1	0.1	0.1	0.1	0.1	0.1	0.1	0.1
	0.1	0.1	0.1	0.1	0.1	0.1	0.1	0.1	0.1	0.1	0.1	0.1
	0.1	0.1	0.1	0.1	0.1	0.1	0.1	0.1	0.1	0.1	0.1	0.1
	0.1	0.1	0.1	0.1	0.1	0.1	0.1	0.1	0.1	0.1	0.1	0.1
	0	0	0	0.1	0.1	0.1	0.1	0.1	0.1	0.1	0.1	0.1
	0	0	0	0.1	0.1	0.1	0.1	0.1	0.1	0.1	0.1	0.1
	0	0	0	0.1	0.1	0.1	0.1	0.1	0.1	0.1	0.1	0.1
	0	0	0	0.1	0.1	0.1	0.1	0.1	0.1	0.1	0.1	0.1
	0.1	0.1	0.1	0	0	0	0.1	0.1	0.1	0.1	0.1	0.1
	0	0	0	0.1	0.1	0.1	0.1	0.1	0.1	0.1	0.1	0.1
	0	0	0	0.1	0.1	0.1	0	0	0	0.1	0.1	0.1
	0	0	0	0	0	0	0.1	0.1	0.1	0.1	0.1	0.1
	0	0	0	0	0	0	0.1	0.1	0.1	0.1	0.1	0.1
	0.1	0.1	0.1	0.1	0.1	0.1	0.1	0.1	0.1	0.1	0.1	0.1
	0	0	0	0.1	0.1	0.1	0	0	0	0.1	0.1	0.1
	0	0	0	0.1	0.1	0.1	0.1	0.1	0.1	0.1	0.1	0.1
	0	0	0	0.1	0.1	0.1	0.1	0.1	0.1	0.1	0.1	0.1
	0	0	0	0	0	0	0.1	0.1	0.1	0.1	0.1	0.1
	0	0	0	0.1	0.1	0.1	0.1	0.1	0.1	0.1	0.1	0.1
	0	0	0	0.1	0.1	0.1	0	0	0	0.1	0.1	0.1
	0	0	0	0.1	0.1	0.1	0	0	0	0.1	0.1	0.1
	0	0	0	0.1	0.1	0.1	0	0	0	0.1	0.1	0.1
	0	0	0	0.1	0.1	0.1	0	0	0	0.1	0.1	0.1
	0	0	0	0.1	0.1	0.1	0	0	0	0	0	0
	0	0	0	0	0	0	0.1	0.1	0.1	0.1	0.1	0.1
	0	0	0	0	0	0	0	0	0	0.1	0.1	0.1
	0	0	0	0.1	0.1	0.1	0	0	0	0.1	0.1	0.1
	0	0	0	0.1	0.1	0.1	0	0	0	0.1	0.1	0.1
	0	0	0	0	0	0	0	0	0	0.1	0.1	0.1
	0	0	0	0.1	0.1	0.1	0	0	0	0.1	0.1	0.1
	0	0	0	0.1	0.1	0.1	0	0	0	0.1	0.1	0.1
	0	0	0	0	0	0	0	0	0	0.1	0.1	0.1
	0	0	0	0	0	0				0.1	0.1	0.1
	0	0	0	0	0	0				0.1	0.1	0.1
	0	0	0	0	0	0				0.1	0.1	0.1
	0	0	0	0.1	0.1	0.1				0.1	0.1	0.1
	0	0	0	0.1	0.1	0.1				0.1	0.1	0.1
	0	0	0	0.1	0.1	0.1				0.1	0.1	0.1
	0	0	0	0.1	0.1	0.1				0.1	0.1	0.1
	0	0	0	0.1	0.1	0.1				0.1	0.1	0.1
	0	0	0	0	0	0				0.1	0.1	0.1
				0	0	0				0.1	0.1	0.1
				0	0	0				0.1	0.1	0.1
				0.1	0.1	0.1				0.1	0.1	0.1
				0.1	0.1	0.1				0.1	0.1	0.1
				0.1	0.1	0.1				0.1	0.1	0.1
				0	0	0				0.1	0.1	0.1
				0	0	0				0.1	0.1	0.1
				0.1	0.1	0.1				0	0	0
				0	0	0				0.1	0.1	0.1
				0	0	0				0.1	0.1	0.1
				0.1	0.1	0.1				0	0	0
				0.1	0.1	0.1				0.1	0.1	0.1
				0	0	0				0.1	0.1	0.1
				0.1	0.1	0.1				0.1	0.1	0.1
				0.1	0.1	0.1				0.1	0.1	0.1
				0.1	0.1	0.1				0.1	0.1	0.1
				0.1	0.1	0.1				0.1	0.1	0.1
				0.1	0.1	0.1				0.1	0.1	0.1
				0.1	0.1	0.1				0.1	0.1	0.1
				0.1	0.1	0.1				0.1	0.1	0.1
				0.1	0.1	0.1				0.1	0.1	0.1
				0	0	0				0.1	0.1	0.1
				0.1	0.1	0.1				0	0	0
				0	0	0				0.1	0.1	0.1
				0.1	0.1	0.1				0.1	0.1	0.1
				0.1	0.1	0.1				0.1	0.1	0.1
				0	0	0				0.1	0.1	0.1
				0.1	0.1	0.1				0	0	0
				0.1	0.1	0.1				0.1	0.1	0.1
				0.1	0.1	0.1				0.1	0.1	0.1
				0.1	0.1	0.1				0.1	0.1	0.1
				0.1	0.1	0.1				0.1	0.1	0.1
				0	0	0				0.1	0.1	0.1
				0.1	0.1	0.1				0.1	0.1	0.1
				0.1	0.1	0.1				0.1	0.1	0.1
				0.1	0.1	0.1				0.1	0.1	0.1
				0	0	0				0.1	0.1	0.1
				0.1	0.1	0.1				0.1	0.1	0.1
				0	0	0				0.1	0.1	0.1
				0	0	0				0	0	0
				0.1	0.1	0.1				0.1	0.1	0.1
				0.1	0.1	0.1				0.1	0.1	0.1
				0.1	0.1	0.1				0.1	0.1	0.1
				0	0	0				0.1	0.1	0.1
				0.1	0.1	0.1				0.1	0.1	0.1
				0.1	0.1	0.1				0.1	0.1	0.1
				0.1	0.1	0.1				0	0	0
				0.1	0.1	0.1				0.1	0.1	0.1
				0.1	0.1	0.1				0.1	0.1	0.1
				0	0	0				0.1	0.1	0.1
				0	0	0				0.1	0.1	0.1
				0.1	0.1	0.1				0.1	0.1	0.1
				0.1	0.1	0.1				0.1	0.1	0.1
				0	0	0				0.1	0.1	0.1
				0	0	0				0.1	0.1	0.1
				0.1	0.1	0.1				0.1	0.1	0.1
				0.1	0.1	0.1				0.1	0.1	0.1
				0.1	0.1	0.1				0.1	0.1	0.1
				0	0	0				0.1	0.1	0.1
				0.1	0.1	0.1				0.1	0.1	0.1
				0	0	0				0	0	0
				0.1	0.1	0.1				0.1	0.1	0.1
				0.1	0.1	0.1				0.1	0.1	0.1
				0.1	0.1	0.1				0.1	0.1	0.1
				0.1	0.1	0.1				0.1	0.1	0.1
				0	0	0				0.1	0.1	0.1
				0	0	0				0.1	0.1	0.1
				0.1	0.1	0.1				0.1	0.1	0.1
				0	0	0				0.1	0.1	0.1
				0.1	0.1	0.1				0.1	0.1	0.1
				0.1	0.1	0.1				0.1	0.1	0.1
				0.1	0.1	0.1				0.1	0.1	0.1
				0.1	0.1	0.1				0.1	0.1	0.1
				0	0	0				0.1	0.1	0.1
				0	0	0				0.1	0.1	0.1
				0.1	0.1	0.1				0.1	0.1	0.1
				0	0	0				0.1	0.1	0.1
				0.1	0.1	0.1				0.1	0.1	0.1
				0.1	0.1	0.1				0.1	0.1	0.1
				0.1	0.1	0.1				0.1	0.1	0.1
				0	0	0				0.1	0.1	0.1
				0	0	0				0.1	0.1	0.1
				0	0	0				0.1	0.1	0.1
				0.1	0.1	0.1				0	0	0
				0.1	0.1	0.1				0.1	0.1	0.1
				0.1	0.1	0.1				0.1	0.1	0.1
				0	0	0				0.1	0.1	0.1
				0.1	0.1	0.1				0.1	0.1	0.1
				0	0	0				0.1	0.1	0.1
				0.1	0.1	0.1				0.1	0.1	0.1
				0	0	0				0.1	0.1	0.1
				0	0	0				0.1	0.1	0.1
				0.1	0.1	0.1				0.1	0.1	0.1
				0.1	0.1	0.1				0.1	0.1	0.1
				0.1	0.1	0.1				0.1	0.1	0.1
				0	0	0				0.1	0.1	0.1
				0.1	0.1	0.1				0	0	0
				0.1	0.1	0.1				0.1	0.1	0.1
				0.1	0.1	0.1				0.1	0.1	0.1
				0.1	0.1	0.1				0.1	0.1	0.1
				0.1	0.1	0.1				0.1	0.1	0.1
				0.1	0.1	0.1				0.1	0.1	0.1
				0.1	0.1	0.1				0.1	0.1	0.1
				0.1	0.1	0.1				0.1	0.1	0.1
				0.1	0.1	0.1				0.1	0.1	0.1
				0.1	0.1	0.1				0.1	0.1	0.1
				0.1	0.1	0.1				0.3	0.3	0.1
				0.1	0.1	0.1				0.1	0.1	0.1
				0.1	0.1	0.1				0.1	0.1	0.1
				0.1	0.1	0.1				0.1	0.1	0.1
				0	0	0				0.1	0.1	0.1
				0.2	0.2	0.1				0	0	0
				0	0	0				0.1	0.1	0.1
				0	0	0				0.1	0.1	0.1
				0	0	0				0.1	0.1	0.1
				0.1	0.1	0.1				0.1	0.1	0.1
				0.1	0.1	0.1				0.1	0.1	0.1
				0.1	0.1	0.1				0.1	0.1	0.1
				0	0	0				0.1	0.1	0.1
				0.1	0.1	0.1				0.1	0.1	0.1
				0	0	0				0.1	0.1	0.1
				0.1	0.1	0.1				0.1	0.1	0.1
				0.1	0.1	0.1				0.1	0.1	0.1
				0	0	0				0.1	0.1	0.1
				0.1	0.1	0.1				0.1	0.1	0.1
				0.1	0.1	0.1				0.1	0.1	0.1
				0	0	0				0.1	0.1	0.1
				0.1	0.1	0.1				0.1	0.1	0.1
				0.1	0.1	0.1				0.1	0.1	0.1
				0.1	0.1	0.1				0	0	0
				0.1	0.1	0.1				0.1	0.1	0.1
				0.1	0.1	0.1				0.1	0.1	0.1
				0.1	0.1	0.1				0.1	0.1	0.1
				0	0	0				0.3	0.3	0.2
				0.1	0.1	0.1				0.1	0.1	0.1
				0.1	0.1	0.1				0.1	0.1	0.1
				0.1	0.1	0.1				0.1	0.1	0.1
				0.1	0.1	0.1				0.1	0.1	0.1
				0	0	0				0.1	0.1	0.1
				0.1	0.1	0.1				0.1	0.1	0.1
				0.1	0.1	0.1				0.1	0.1	0.1
				0.1	0.1	0.1				0.1	0.1	0.1
				0.2	0.2	0.2				0.1	0.1	0.1
				0	0	0				0.1	0.1	0.1
				0.1	0.1	0.1				0.1	0.1	0.1
				0	0	0				0.1	0.1	0.1
				0	0	0				0.1	0.1	0.1
				0.1	0.1	0.1				0.1	0.1	0.1
				0.1	0.1	0.1				0.1	0.1	0.1
				0.1	0.1	0.1				0.1	0.1	0.1
				0.1	0.1	0.1				0.1	0.1	0.1
				0	0	0				0.1	0.1	0.1
				0.1	0.1	0.1				0.1	0.1	0.1
				0.1	0.1	0.1				0.1	0.1	0.1
				0	0	0				0.1	0.1	0.1
				0.1	0.1	0.1				0.1	0.1	0.1
				0	0	0				0.1	0.1	0.1
				0.1	0.1	0.1				0.1	0.1	0.1
				0	0	0				0.1	0.1	0.1
				0.1	0.1	0.1				0	0	0
				0.1	0.1	0.1				0.1	0.1	0.1
				0.1	0.1	0.1				0.1	0.1	0.1
				0.1	0.1	0.1				0.1	0.1	0.1
				0	0	0				0.1	0.1	0.1
				0.1	0.1	0.1				0.1	0.1	0.1
				0.1	0.1	0.1				0.1	0.1	0.1
				0	0	0				0.1	0.1	0.1
				0	0	0				0.1	0.1	0.1
				0.1	0.1	0.1				0.1	0.1	0.1
				0.1	0.1	0.1				0.1	0.1	0.1
				0	0	0				0.1	0.1	0.1
				0.1	0.1	0.1				0.1	0.1	0.1
				0.1	0.1	0.1				0.1	0.1	0.1
				0.1	0.1	0.1				0.2	0.2	0.2
				0.1	0.1	0.1				0.1	0.1	0.1
				0.1	0.1	0.1				0.2	0.2	0.2
				0.1	0.1	0.1				0.1	0.1	0.1
				0	0	0				0.1	0.1	0.1
				0.1	0.1	0.1				0.1	0.1	0.1
				0.1	0.1	0.1				0.1	0.1	0.1
				0.1	0.1	0.1				0.1	0.1	0.1
				0.1	0.1	0.1				0.1	0.1	0.1
				0.1	0.1	0.1				0.1	0.1	0.1
				0.1	0.1	0.1				0.1	0.1	0.1
				0.1	0.1	0.1				0.1	0.1	0.1
				0	0	0				0.1	0.1	0.1
				0.1	0.1	0.1				0.1	0.1	0.1
				0.1	0.1	0.1				0.1	0.1	0.1
				0.1	0.1	0.1				0.1	0.1	0.1
				0	0	0				0.1	0.1	0.1
				0.1	0.1	0.1				0.1	0.1	0.1
				0	0	0				0.1	0.1	0.1
				0.1	0.1	0.1				0.1	0.1	0.1
				0.1	0.1	0.1				0.1	0.1	0.1
				0.1	0.1	0.1				0	0	0
				0.1	0.1	0.1				0.1	0.1	0.1
				0.1	0.1	0.1				0.1	0.1	0.1
				0.1	0.1	0.1				0.1	0.1	0.1
				0.1	0.1	0.1				0.2	0.2	0.2
				0	0	0				0.1	0.1	0.1
				2.1	0.8	0.2				0.1	0.1	0.1
				0.3	0.3	0.3				0.1	0.1	0.1
				0.4	0.4	0.4				0.1	0.1	0.1
				0.2	0.2	0.2				0.1	0.1	0.1
				0.6	0.6	0.3				0.1	0.1	0.1
				0.3	0.3	0.3				0.1	0.1	0.1
				0.2	0.2	0.2				0.1	0.1	0.1
				0.2	0.2	0.2				0.1	0.1	0.1
				0.3	0.3	0.3				0.1	0.1	0.1
				0.3	0.3	0.3				0.1	0.1	0.1
				0.2	0.2	0.2				0.1	0.1	0.1
				0.3	0.3	0.3				0.1	0.1	0.1
				0.1	0.1	0.1				0.1	0.1	0.1
				0.2	0.2	0.2				0.1	0.1	0.1
				0.2	0.2	0.2				0.1	0.1	0.1
				0.2	0.2	0.2				0.1	0.1	0.1
				0.2	0.2	0.2				0.1	0.1	0.1
				0.2	0.2	0.2				0.1	0.1	0.1
				0.2	0.2	0.2				0.1	0.1	0.1
				0.1	0.1	0.1				0.1	0.1	0.1
				0.2	0.2	0.2				0.1	0.1	0.1
				0.1	0.1	0.1				0.1	0.1	0.1
				0.1	0.1	0.1				0.1	0.1	0.1
				0.1	0.1	0.1				0.1	0.1	0.1
				0.7	0.6	0.1				0.1	0.1	0.1
				0.1	0.1	0.1				0.1	0.1	0.1
				0.2	0.2	0.1				0.1	0.1	0.1
				0.1	0.1	0.1				0.1	0.1	0.1
				0.1	0.1	0.1				0.1	0.1	0.1
				0.1	0.1	0.1				0.1	0.1	0.1
				0.1	0.1	0.1				0.1	0.1	0.1
				0.1	0.1	0.1				0.1	0.1	0.1
				0.1	0.1	0.1				0.1	0.1	0.1
				0.1	0.1	0.1				0.1	0.1	0.1
				0	0	0				0.1	0.1	0.1
				0.1	0.1	0.1				0.1	0.1	0.1
				0.1	0.1	0.1				0.1	0.1	0.1
				0.1	0.1	0.1				0.1	0.1	0.1
				0.1	0.1	0.1				0.1	0.1	0.1
				0.1	0.1	0.1				0.1	0.1	0.1
				0	0	0				0.1	0.1	0.1
				0.1	0.1	0.1				0.2	0.2	0.2
				0.1	0.1	0.1				0.1	0.1	0.1
				0.1	0.1	0.1				0.1	0.1	0.1
				0.1	0.1	0.1				0.1	0.1	0.1
				0	0	0				0.1	0.1	0.1
				0	0	0				0.1	0.1	0.1
				0	0	0				0.2	0.2	0.2
				0	0	0				0.1	0.1	0.1
				0	0	0				0.1	0.1	0.1
				0	0	0				0.1	0.1	0.1
				1	0.6	0.1				0.1	0.1	0.1
				0	0	0				0.1	0.1	0.1
				0	0	0				0.1	0.1	0.1
				0	0	0				0.1	0.1	0.1
				0	0	0				0.1	0.1	0.1
										0.1	0.1	0.1
										0.1	0.1	0.1
										0.1	0.1	0.1
										0.1	0.1	0.1
										0.1	0.1	0.1
										0.1	0.1	0.1
										0.1	0.1	0.1
										0.1	0.1	0.1
										0.1	0.1	0.1
										0.1	0.1	0.1
										0.1	0.1	0.1
										0.1	0.1	0.1
										0.1	0.1	0.1
										0.1	0.1	0.1
										0.1	0.1	0.1
										0.1	0.1	0.1
										0.1	0.1	0.1
										0.1	0.1	0.1
										0.1	0.1	0.1
										0.1	0.1	0.1
										0.1	0.1	0.1
										0.1	0.1	0.1
										0.1	0.1	0.1
										0.1	0.1	0.1
										0.1	0.1	0.1
										0.1	0.1	0.1
										0.1	0.1	0.1
										0.1	0.1	0.1
										0.1	0.1	0.1
										0.1	0.1	0.1
										0.1	0.1	0.1
										0.1	0.1	0.1
										0.1	0.1	0.1
										0.1	0.1	0.1
										0.1	0.1	0.1
										0.1	0.1	0.1
										0.1	0.1	0.1
										0.2	0.2	0.1
										0.1	0.1	0.1
										0.1	0.1	0.1
										0.1	0.1	0.1
										0.1	0.1	0.1
										0.1	0.1	0.1
										0.1	0.1	0.1
										0.1	0.1	0.1
										0.2	0.2	0.2
										0.1	0.1	0.1
										0.1	0.1	0.1
										0.2	0.2	0.2
										0.1	0.1	0.1
										0.1	0.1	0.1
										0.1	0.1	0.1
										0.1	0.1	0.1
										0.1	0.1	0.1
										0.1	0.1	0.1
										0.1	0.1	0.1
										0.1	0.1	0.1
										0.1	0.1	0.1
										0.1	0.1	0.1
										0.1	0.1	0.1
										0.1	0.1	0.1
										0.1	0.1	0.1
										0.1	0.1	0.1
										0.1	0.1	0.1
										0.1	0.1	0.1
										0.1	0.1	0.1
										0.1	0.1	0.1
										0	0	0
										0.1	0.1	0.1
										0.1	0.1	0.1
										0.1	0.1	0.1
										0.1	0.1	0.1
										0.1	0.1	0.1
										0.1	0.1	0.1
										0.1	0.1	0.1
										0.1	0.1	0.1
										0.1	0.1	0.1
										0.1	0.1	0.1
										0.1	0.1	0.1
										0	0	0
										0.1	0.1	0.1
										0.1	0.1	0.1
										0.2	0.2	0.2
										0.1	0.1	0.1
										0.1	0.1	0.1
										0.1	0.1	0.1
										0.1	0.1	0.1
										0.1	0.1	0.1
										0.1	0.1	0.1
										0.1	0.1	0.1
										0.1	0.1	0.1
										0.1	0.1	0.1
										0.1	0.1	0.1
										0.1	0.1	0.1
										0.1	0.1	0.1
										0.1	0.1	0.1
										0.2	0.2	0.2
										0.1	0.1	0.1
										0.1	0.1	0.1
										0.1	0.1	0.1
										0.1	0.1	0.1
										0.1	0.1	0.1
										0.1	0.1	0.1
										0.1	0.1	0.1
										0.1	0.1	0.1
										0.1	0.1	0.1
										0.1	0.1	0.1
										0.1	0.1	0.1
										0.1	0.1	0.1
										0.1	0.1	0.1
										0.1	0.1	0.1
										0.1	0.1	0.1
										0.8	0.7	0.2
										0.1	0.1	0.1
										0.1	0.1	0.1
										0.1	0.1	0.1
										0.1	0.1	0.1
										0.1	0.1	0.1
										0.1	0.1	0.1
										0.2	0.2	0.2
										0.1	0.1	0.1
										0.1	0.1	0.1
										0.1	0.1	0.1
										0.1	0.1	0.1
										0.1	0.1	0.1
										0.2	0.2	0.2
										0.1	0.1	0.1
										0.1	0.1	0.1
										0.1	0.1	0.1
										0.1	0.1	0.1
										0.1	0.1	0.1
										0	0	0
										0.1	0.1	0.1
										0.1	0.1	0.1
										0.1	0.1	0.1
										0.1	0.1	0.1
										0.1	0.1	0.1
										0.2	0.2	0.2
										0.1	0.1	0.1
										0.1	0.1	0.1
										0.1	0.1	0.1
										0.1	0.1	0.1
										0.1	0.1	0.1
										0.1	0.1	0.1
										0.1	0.1	0.1
										0.2	0.2	0.2
										0.1	0.1	0.1
										0.1	0.1	0.1
										0.2	0.2	0.2
										0.2	0.2	0.2
										0.1	0.1	0.1
										0.1	0.1	0.1
										0.1	0.1	0.1
										0.1	0.1	0.1
										0.1	0.1	0.1
										0.1	0.1	0.1
										0.1	0.1	0.1
										0.1	0.1	0.1
										0.1	0.1	0.1
										0.1	0.1	0.1
										0.1	0.1	0.1
										0.1	0.1	0.1
										0.1	0.1	0.1
										0.1	0.1	0.1
										0.1	0.1	0.1
										0.1	0.1	0.1
										0.1	0.1	0.1
										0.1	0.1	0.1
										0.1	0.1	0.1
										0.1	0.1	0.1
										0.1	0.1	0.1
										0.1	0.1	0.1
										0.1	0.1	0.1
										0.1	0.1	0.1
										0.1	0.1	0.1
										0.1	0.1	0.1
										0.1	0.1	0.1
										0.1	0.1	0.1
										0.1	0.1	0.1
										0.1	0.1	0.1
										0.1	0.1	0.1
										0.2	0.2	0.2
										0.1	0.1	0.1
										0.1	0.1	0.1
										0.2	0.2	0.2
										0.1	0.1	0.1
										0.1	0.1	0.1
										0.1	0.1	0.1
										0.1	0.1	0.1
										0.1	0.1	0.1
										0.1	0.1	0.1
										0.1	0.1	0.1
										0.1	0.1	0.1
										0.1	0.1	0.1
										0.1	0.1	0.1
										0.1	0.1	0.1
										0.1	0.1	0.1
										0.1	0.1	0.1
										0.1	0.1	0.1
										0.1	0.1	0.1
										0.1	0.1	0.1
										0.2	0.2	0.2
										0.1	0.1	0.1
										0.1	0.1	0.1
										0.1	0.1	0.1
										0.1	0.1	0.1
										0.2	0.2	0.2
										0.1	0.1	0.1
										0.1	0.1	0.1
										0.1	0.1	0.1
										0.1	0.1	0.1
										0	0	0
										0.1	0.1	0.1
										0.2	0.2	0.2
										0.1	0.1	0.1
										0.1	0.1	0.1
										0.2	0.2	0.2
										0.1	0.1	0.1
										0.1	0.1	0.1
										0.1	0.1	0.1
										0.1	0.1	0.1
										0.2	0.2	0.2
										0.1	0.1	0.1
										0.2	0.2	0.2
										0.2	0.2	0.2
										0.1	0.1	0.1
										0.1	0.1	0.1
										0.1	0.1	0.1
										0.2	0.2	0.2
										0.1	0.1	0.1
										0.1	0.1	0.1
										0.1	0.1	0.1
										0.1	0.1	0.1
										0.1	0.1	0.1
										0.1	0.1	0.1
										0.2	0.2	0.2
										0.1	0.1	0.1
										0.2	0.2	0.2
										0.1	0.1	0.1
										0.2	0.2	0.2
										0.1	0.1	0.1
										0.1	0.1	0.1
										0.1	0.1	0.1
										0.1	0.1	0.1
										0.2	0.2	0.2
										0.1	0.1	0.1
										0.1	0.1	0.1
										0.1	0.1	0.1
										0.2	0.2	0.2
										0.1	0.1	0.1
										0.1	0.1	0.1
										0.1	0.1	0.1
										0.2	0.2	0.2
										0.2	0.2	0.2
										0.2	0.2	0.2
										0.1	0.1	0.1
										0.1	0.1	0.1
										0.1	0.1	0.1
										0.2	0.2	0.2
										0.1	0.1	0.1
										0.1	0.1	0.1
										0.1	0.1	0.1
										0.1	0.1	0.1
										0.1	0.1	0.1
										0.1	0.1	0.1
										0.1	0.1	0.1
										0.1	0.1	0.1
										0.1	0.1	0.1
										0.1	0.1	0.1
										0.1	0.1	0.1
										0.1	0.1	0.1
										0.1	0.1	0.1
										0.1	0.1	0.1
										0.1	0.1	0.1
										0.1	0.1	0.1
										0.1	0.1	0.1
										0.1	0.1	0.1
										0.1	0.1	0.1
										0.1	0.1	0.1
										0.2	0.2	0.2
										0.1	0.1	0.1
										0.1	0.1	0.1
										0.1	0.1	0.1
										0.2	0.2	0.2
										0.2	0.2	0.2
										0.1	0.1	0.1
										0.2	0.2	0.2
										0.1	0.1	0.1
										0.2	0.2	0.2
										0.1	0.1	0.1
										0.1	0.1	0.1
										0.1	0.1	0.1
										0.1	0.1	0.1
										0.1	0.1	0.1
										0.2	0.2	0.2
										0.1	0.1	0.1
										0.2	0.2	0.2
										0.3	0.3	0.2
										0.2	0.2	0.2
										0.1	0.1	0.1
										0.1	0.1	0.1
										0.1	0.1	0.1
										0.1	0.1	0.1
										0.2	0.2	0.2
										0.1	0.1	0.1
										0.1	0.1	0.1
										0.1	0.1	0.1
										0.1	0.1	0.1
										0.1	0.1	0.1
										0.1	0.1	0.1
										0.2	0.2	0.2
										0.1	0.1	0.1
										0.1	0.1	0.1
										0.1	0.1	0.1
										0.1	0.1	0.1
										0.2	0.2	0.2
										0.1	0.1	0.1
										0.1	0.1	0.1
										0.1	0.1	0.1
										0.1	0.1	0.1
										0.1	0.1	0.1
										0.1	0.1	0.1
										0.1	0.1	0.1
										0.1	0.1	0.1
										0.1	0.1	0.1
										0.1	0.1	0.1
										0.1	0.1	0.1
										0.1	0.1	0.1
										0.2	0.2	0.2
										0.1	0.1	0.1
										0.2	0.2	0.2
										0.1	0.1	0.1
										0.1	0.1	0.1
										0.2	0.2	0.2
										1	0.7	0.2
										0.1	0.1	0.1
										0.1	0.1	0.1
										0.1	0.1	0.1
										0.1	0.1	0.1
										0.1	0.1	0.1
										0.1	0.1	0.1
										0.2	0.2	0.2
										0.1	0.1	0.1
										0.1	0.1	0.1
										0.1	0.1	0.1
										0.1	0.1	0.1
										0.1	0.1	0.1
										0.1	0.1	0.1
										0.1	0.1	0.1
										0.1	0.1	0.1
										0.2	0.2	0.2
										0.1	0.1	0.1
										0.2	0.2	0.2
										0.2	0.2	0.2
										0.2	0.2	0.2
										0.1	0.1	0.1
										0.1	0.1	0.1
										0.2	0.2	0.2
										0.2	0.2	0.2
										0.1	0.1	0.1
										0.1	0.1	0.1
										0.1	0.1	0.1
										0.2	0.2	0.2
										0.2	0.2	0.2
										0.1	0.1	0.1
										0.2	0.2	0.2
										0.1	0.1	0.1
										0.1	0.1	0.1
										0.1	0.1	0.1
										0.1	0.1	0.1
										0.1	0.1	0.1
										0.2	0.2	0.2
										0.1	0.1	0.1
										0.1	0.1	0.1
										0.2	0.2	0.2
										0.1	0.1	0.1
										0.1	0.1	0.1
										0.2	0.2	0.2
										0.1	0.1	0.1
										0.1	0.1	0.1
										0.2	0.2	0.2
										0.1	0.1	0.1
										0.2	0.2	0.2
										0.1	0.1	0.1
										0.1	0.1	0.1
										0.2	0.2	0.2
										0.2	0.2	0.2
										0.2	0.2	0.2
										0.1	0.1	0.1
										0.2	0.2	0.2
										0.1	0.1	0.1
										0.1	0.1	0.1
										0.2	0.2	0.2
										0.2	0.2	0.2
										0.2	0.2	0.2
										0.1	0.1	0.1
										0.1	0.1	0.1
										0.1	0.1	0.1
										0.1	0.1	0.1
										0.1	0.1	0.1
										0.1	0.1	0.1
										0.1	0.1	0.1
										0.1	0.1	0.1
										0.1	0.1	0.1
										0.1	0.1	0.1
										0.1	0.1	0.1
										0.1	0.1	0.1
										0.1	0.1	0.1
										0.2	0.2	0.2
										0.1	0.1	0.1
										0.1	0.1	0.1
										0.1	0.1	0.1
										0.1	0.1	0.1
										0.1	0.1	0.1
										0.2	0.2	0.2
										0.1	0.1	0.1
										0.2	0.2	0.2
										0.2	0.2	0.2
										0.1	0.1	0.1
										0.2	0.2	0.2
										0.1	0.1	0.1
										0.1	0.1	0.1
										0.1	0.1	0.1
										0.1	0.1	0.1
										0.2	0.2	0.2
										0.2	0.2	0.2
										0.1	0.1	0.1
										0.1	0.1	0.1
										0.2	0.2	0.2
										0.1	0.1	0.1
										0.2	0.2	0.2
										0.1	0.1	0.1
										0.2	0.2	0.2
										0.1	0.1	0.1
										0.1	0.1	0.1
										0.2	0.2	0.2
										0.2	0.2	0.2
										0.1	0.1	0.1
										0.1	0.1	0.1
										0.2	0.2	0.2
										0.1	0.1	0.1
										0.1	0.1	0.1
										0.1	0.1	0.1
										0.1	0.1	0.1
										0.1	0.1	0.1
										0.1	0.1	0.1
										0.2	0.2	0.2
										0.1	0.1	0.1
										0.1	0.1	0.1
										0.2	0.2	0.2
										0.1	0.1	0.1
										0.2	0.2	0.2
										0.2	0.2	0.2
										0.2	0.2	0.2
										0.2	0.2	0.2
										0.1	0.1	0.1
										0.2	0.2	0.2
										0.2	0.2	0.2
										0.1	0.1	0.1
										0.2	0.2	0.2
										0.1	0.1	0.1
										0.1	0.1	0.1
										0.2	0.2	0.2
										0.1	0.1	0.1
										0.2	0.2	0.2
										0.1	0.1	0.1
										0.1	0.1	0.1
										0.1	0.1	0.1
										0.2	0.2	0.2
										0.2	0.2	0.2
										0.2	0.2	0.2
										0.1	0.1	0.1
										0.2	0.2	0.2
										0.1	0.1	0.1
										0.1	0.1	0.1
										0.2	0.2	0.2
										0.1	0.1	0.1
										0.1	0.1	0.1
										0.2	0.2	0.2
										0.1	0.1	0.1
										0.2	0.2	0.2
										0.1	0.1	0.1
										0.2	0.2	0.2
										0.2	0.2	0.2
										0.1	0.1	0.1
										0.2	0.2	0.2
										0.1	0.1	0.1
										0.1	0.1	0.1
										0.2	0.2	0.2
										0.2	0.2	0.2
										0.2	0.2	0.2
										0.1	0.1	0.1
										0.1	0.1	0.1
										0.2	0.2	0.2
										0.2	0.2	0.2
										0.2	0.2	0.2
										0.2	0.2	0.2
										0.1	0.1	0.1
										0.1	0.1	0.1
										0.2	0.2	0.2
										0.2	0.2	0.2
										0.1	0.1	0.1
										0.2	0.2	0.2
[truncated: 2,302 more rows]

## Sheet: conifer
ug/m^3	4ms	1/8
PM	10	2.5	1	10	2.5	1	10	2.5	1	10	2.5	1		Total	PM10	1328
	0	0	0	0.2	0.2	0.1	0	0	0	0	0	0		128.6	183.1	16.8	34.4
	0	0	0	0.9	0.6	0	0	0	0	0	0	0
	0	0	0	0.7	0.6	0	0	0	0	0	0	0		90.725	39.3754
	0	0	0	0	0	0	0	0	0	0	0	0
	0.1	0.1	0.1	0.9	0.6	0	0.9	0.6	0	0	0	0
	0	0	0	0	0	0	0	0	0	0	0	0
	0.1	0.1	0.1	0	0	0	0	0	0	0	0	0
	0	0	0	0	0	0	0	0	0	0	0	0
	0.1	0.1	0.1	1.2	0.5	0	0	0	0	0.1	0.1	0.1
	0	0	0	0.1	0.1	0.1	0	0	0	0	0	0
	0	0	0	0.1	0.1	0.1	0.1	0.1	0.1	0	0	0
	0	0	0	0.1	0.1	0.1	0	0	0	0	0	0
	0.1	0.1	0.1	0	0	0	0	0	0	0	0	0
	0.1	0.1	0.1	0	0	0	0	0	0	0	0	0
	0.1	0.1	0.1	0.9	0.6	0.1	0	0	0	0	0	0
	0.1	0.1	0.1	0	0	0	0	0	0	0.1	0.1	0.1
	0.1	0.1	0.1	9.4	0.4	0	0	0	0	0	0	0
	0.1	0.1	0.1	0	0	0	0.1	0.1	0.1	0.2	0.2	0.1
	0.1	0.1	0.1	0	0	0	0.7	0.5	0	0	0	0
	0.1	0.1	0.1	1.1	0.6	0.1	0	0	0	1.9	1.2	0
	0	0	0	0.4	0.4	0.1	0.1	0.1	0.1	0	0	0
	0	0	0	0.4	0.4	0.1	0	0	0	0	0	0
	0	0	0	0	0	0	0	0	0	0	0	0
	0	0	0	0.1	0.1	0.1	0	0	0	0	0	0
	0.1	0.1	0.1	0	0	0	0	0	0	0	0	0
	0	0	0	0.7	0.5	0	0	0	0	0	0	0
	0	0	0	0.9	0.6	0.1	0	0	0	0	0	0
	0	0	0	0.1	0.1	0.1	0.1	0.1	0.1	0.7	0.5	0
	0.1	0.1	0.1	0	0	0	0.1	0.1	0.1	0	0	0
	0	0	0	1.1	0.6	0.1	0.1	0.1	0.1	0	0	0
	0	0	0	0.1	0.1	0.1	0	0	0	0	0	0
	0	0	0	0	0	0	0	0	0	0	0	0
	0.1	0.1	0.1	1.2	0.6	0.1	0	0	0	0	0	0
	0	0	0	0	0	0	0.1	0.1	0.1	0	0	0
	0.1	0.1	0.1	0.1	0.1	0.1	0	0	0	0.4	0.3	0
	0	0	0	0.1	0.1	0.1	0	0	0	0.3	0.3	0
	0	0	0	0	0	0	0.1	0.1	0.1	0	0	0
	0.1	0.1	0.1	0	0	0	0	0	0	0	0	0
	0.1	0.1	0.1	0.2	0.2	0.1	0	0	0	0	0	0
	0.1	0.1	0.1	0	0	0	0	0	0	0	0	0
	0.1	0.1	0.1	0.1	0.1	0.1	0.9	0.6	0	0	0	0
	0.1	0.1	0.1	0.2	0.2	0.1	0	0	0	0	0	0
	0.1	0.1	0.1	0.1	0.1	0.1	0	0	0	0	0	0
	0	0	0	0	0	0	0	0	0	0	0	0
	0	0	0	0	0	0	0	0	0	0	0	0
	0.1	0.1	0.1	0	0	0	1.9	1.1	0	0	0	0
	0.1	0.1	0.1	0	0	0	0	0	0	0	0	0
	0	0	0	0.4	0.4	0.1	0	0	0	0	0	0
	0	0	0	0.1	0.1	0.1	0	0	0	0.1	0.1	0.1
	0.1	0.1	0.1	0	0	0	0	0	0	0.1	0.1	0.1
	0	0	0	0	0	0	0	0	0	0	0	0
	0	0	0	0	0	0	0.1	0.1	0.1	0	0	0
	0.1	0.1	0.1	0	0	0	0	0	0	0	0	0
	0.1	0.1	0.1	0.3	0.3	0.1	0	0	0	0	0	0
	0	0	0	0.1	0.1	0.1	0	0	0	0	0	0
	0.1	0.1	0.1	1.1	0.7	0.1	0	0	0	0	0	0
	0	0	0	0	0	0	0	0	0	0	0	0
	0	0	0	0.1	0.1	0.1	0	0	0	0	0	0
	0	0	0	0	0	0	0.1	0.1	0.1	0	0	0
	0.1	0.1	0.1	0.1	0.1	0.1	0	0	0	0	0	0
	0	0	0	1.2	0.6	0.1	0	0	0	0	0	0
	0.1	0.1	0.1	0	0	0	0.1	0.1	0.1	0	0	0
	0	0	0	0.8	0.6	0.1	0	0	0	0	0	0
	0.1	0.1	0.1	0	0	0	0	0	0	0.9	0.6	0
	0.1	0.1	0.1	0.1	0.1	0.1	0	0	0	0	0	0
	0.1	0.1	0.1	0.1	0.1	0.1	0.1	0.1	0	0	0	0
	0	0	0	0	0	0	0	0	0	0	0	0
	0	0	0	1.9	0.6	0	0	0	0	0	0	0
	0.1	0.1	0.1	0.1	0.1	0.1	0.1	0.1	0.1	0	0	0
	0.1	0.1	0.1	0	0	0	0	0	0	0	0	0
	0.1	0.1	0.1	0.1	0.1	0.1	0	0	0	0	0	0
	0.1	0.1	0.1	0.1	0.1	0.1	0	0	0	0	0	0
	0	0	0	0	0	0	0	0	0	0	0	0
	0	0	0	0.1	0.1	0.1	0.4	0.3	0	0	0	0
	0.1	0.1	0.1	0	0	0	0	0	0	0.1	0.1	0.1
	0.1	0.1	0.1	0	0	0	0	0	0	0	0	0
	0	0	0	0.2	0.2	0.1	0	0	0	0.1	0.1	0.1
	0.1	0.1	0.1	0	0	0	0	0	0	0	0	0
	0	0	0	0.1	0.1	0.1	0	0	0	0	0	0
	0	0	0	0	0	0	0	0	0	0	0	0
	0	0	0	0.1	0.1	0.1	0	0	0	0	0	0
	0.1	0.1	0.1	0	0	0	0	0	0	0	0	0
	0.1	0.1	0.1	0	0	0	0	0	0	0	0	0
	0.1	0.1	0.1	0	0	0	0	0	0	0	0	0
	0.1	0.1	0.1	0.1	0.1	0.1	0	0	0	0	0	0
	0.1	0.1	0.1	0.1	0.1	0.1	0.1	0.1	0.1	0	0	0
	0.1	0.1	0.1	0	0	0	0	0	0	0	0	0
	0.1	0.1	0.1	0.1	0.1	0.1	0	0	0	0	0	0
	0.1	0.1	0.1	0	0	0	0	0	0	0	0	0
	0.1	0.1	0.1	0	0	0	0	0	0	0	0	0
	0.1	0.1	0.1	0	0	0	0	0	0	0	0	0
	0.1	0.1	0.1	0.1	0.1	0.1	0	0	0	0	0	0
	0.1	0.1	0.1	0	0	0	0	0	0	0	0	0
	0	0	0	0.1	0.1	0.1	0	0	0	0	0	0
	0	0	0	0.1	0.1	0.1	0.1	0.1	0.1	0	0	0
	0.1	0.1	0.1	0.1	0.1	0.1	0	0	0	0	0	0
	0	0	0	0.8	0.6	0.1	0	0	0	0.1	0.1	0
	0.1	0.1	0.1	0	0	0	0	0	0	0	0	0
	0.2	0.2	0.1	0	0	0	0	0	0	0	0	0
	0.1	0.1	0.1	0	0	0	0	0	0	0	0	0
	0.1	0.1	0.1	0	0	0	0	0	0	0	0	0
	0.5	0.4	0.1	0	0	0	0	0	0	0	0	0
	0.1	0.1	0.1	0.1	0.1	0.1	0	0	0	0	0	0
	0	0	0	0.1	0.1	0.1	0	0	0	0.1	0.1	0.1
	0.2	0.2	0.1	0	0	0	0	0	0	0	0	0
	0.1	0.1	0.1	0	0	0	0	0	0	0	0	0
	0	0	0	0.1	0.1	0.1	0	0	0	0	0	0
	0.1	0.1	0.1	0.1	0.1	0.1	0.1	0.1	0.1	0	0	0
	0.1	0.1	0.1	0.1	0.1	0.1	0	0	0	0	0	0
	0.1	0.1	0.1	0.1	0.1	0.1	0	0	0	0	0	0
	0.1	0.1	0.1	0.2	0.2	0.1	1.1	0.7	0.1	0	0	0
	0.1	0.1	0.1	0	0	0	0	0	0	0	0	0
	0.1	0.1	0.1	0.1	0.1	0.1	0	0	0	0.1	0.1	0.1
	0.1	0.1	0.1	0.1	0.1	0.1	0	0	0	0	0	0
	0.1	0.1	0.1	0	0	0	0	0	0	0	0	0
	0.1	0.1	0.1	0	0	0	0	0	0	0	0	0
	0	0	0	0.1	0.1	0.1	0	0	0	0	0	0
	0	0	0	0	0	0	0	0	0	0	0	0
	0.1	0.1	0.1	0.3	0.2	0.1	0	0	0	0	0	0
	0.1	0.1	0.1	0.1	0.1	0.1	0	0	0	0	0	0
	0.1	0.1	0.1	0	0	0	0	0	0	0	0	0
	0.1	0.1	0.1	0.1	0.1	0.1	0	0	0	0	0	0
	0.1	0.1	0.1	0	0	0	0	0	0	0	0	0
	0.1	0.1	0.1	0.2	0.2	0.1	0	0	0	0	0	0
	0.1	0.1	0.1	1.9	0.6	0.1	0	0	0	0	0	0
	0	0	0	0.1	0.1	0.1	0	0	0	0	0	0
	0.1	0.1	0.1	0.1	0.1	0.1	0	0	0	0	0	0
	0.4	0.4	0.1	0.1	0.1	0.1	0	0	0	0	0	0
	0	0	0	0	0	0	0	0	0	0	0	0
	0	0	0	0.1	0.1	0.1	0.1	0.1	0.1	0	0	0
	0.1	0.1	0.1	0	0	0	0	0	0	0	0	0
	0.1	0.1	0.1	0.1	0.1	0.1	0	0	0	0.4	0.3	0
	0.1	0.1	0.1	0	0	0	0	0	0	0	0	0
	0.1	0.1	0.1	0.1	0.1	0.1	0	0	0	0	0	0
	0	0	0	0.1	0.1	0.1	0	0	0	0	0	0
	0.1	0.1	0.1	0.1	0.1	0.1	0	0	0	0	0	0
	0.1	0.1	0.1	0.1	0.1	0.1	0	0	0	0	0	0
	0.1	0.1	0.1	0	0	0	0	0	0	0	0	0
	0	0	0	0.1	0.1	0.1	0	0	0	0	0	0
	0.1	0.1	0.1	0.1	0.1	0.1	0.1	0.1	0.1	0	0	0
	0.1	0.1	0.1	0.1	0.1	0.1	0	0	0	0.1	0.1	0.1
	0.1	0.1	0.1	0	0	0	0	0	0	0	0	0
	0.1	0.1	0.1	0	0	0	0	0	0	0	0	0
	0.1	0.1	0.1	0.1	0.1	0.1	0	0	0	0	0	0
	0.1	0.1	0.1	0	0	0	0	0	0	0	0	0
	0.1	0.1	0.1	0.1	0.1	0.1	0.1	0.1	0.1	0	0	0
	0.1	0.1	0.1	0	0	0	0	0	0	0	0	0
	0.1	0.1	0.1	0.1	0.1	0.1	0.1	0.1	0.1	0	0	0
	0.1	0.1	0.1	0.1	0.1	0.1	0	0	0	0	0	0
	0.1	0.1	0.1	0.1	0.1	0.1	0	0	0	0	0	0
	0	0	0	0	0	0	0	0	0	0	0	0
	0.1	0.1	0.1	0.1	0.1	0.1	0	0	0	0	0	0
	0.1	0.1	0.1	0	0	0	0	0	0	0	0	0
	0	0	0	0.1	0.1	0.1	0	0	0	0	0	0
	0	0	0	0.1	0.1	0.1	0	0	0	0	0	0
	0.1	0.1	0.1	0.1	0.1	0.1	0	0	0	0	0	0
	0	0	0	0.1	0.1	0.1	0	0	0	0	0	0
	0	0	0	0.1	0.1	0.1	0	0	0	0	0	0
	0.1	0.1	0.1	0.1	0.1	0.1	0	0	0	0	0	0
	0.1	0.1	0.1	0.4	0.4	0.1	0	0	0	0	0	0
	0.1	0.1	0.1	0	0	0	0	0	0	0	0	0
	0.1	0.1	0.1	0	0	0	0	0	0	0.1	0.1	0.1
	0.1	0.1	0.1	0.1	0.1	0.1	0.1	0.1	0.1	0	0	0
	0.1	0.1	0.1	0	0	0	0	0	0	0	0	0
	0.1	0.1	0.1	0	0	0	0	0	0	0	0	0
	0.1	0.1	0.1	0	0	0	0	0	0	0	0	0
	0.1	0.1	0.1	0.1	0.1	0.1	0.1	0.1	0.1	0	0	0
	0.1	0.1	0.1	0.1	0.1	0.1	0	0	0	0	0	0
	0.1	0.1	0.1	0.1	0.1	0.1	0.1	0.1	0.1	0	0	0
	0.1	0.1	0.1	0.1	0.1	0.1	0	0	0	0	0	0
	0	0	0	0	0	0	0	0	0	0	0	0
	0.1	0.1	0.1	0	0	0	0	0	0	0	0	0
	0.1	0.1	0.1	0	0	0	0	0	0	0	0	0
	0.1	0.1	0.1	0.1	0.1	0.1	0	0	0	0	0	0
	0.1	0.1	0.1	0.1	0.1	0.1	0	0	0	0	0	0
	0.1	0.1	0.1	0.1	0.1	0.1	0	0	0	0	0	0
	0.1	0.1	0.1	0	0	0	0	0	0	0	0	0
	0	0	0	0	0	0	0	0	0	0	0	0
	0	0	0	0	0	0	0	0	0	0	0	0
	0	0	0	0.1	0.1	0.1	0	0	0	0	0	0
	0.1	0.1	0.1	0	0	0	0.1	0.1	0	0	0	0
	0.1	0.1	0.1	0.1	0.1	0.1	0.2	0.2	0.1	0	0	0
	0.1	0.1	0.1	0	0	0	0	0	0	0	0	0
	0.1	0.1	0.1	0	0	0	0	0	0	0	0	0
	0	0	0	0	0	0	0	0	0	0.1	0.1	0.1
	0.1	0.1	0.1	0.1	0.1	0.1	0	0	0	0	0	0
	0.1	0.1	0.1	0.1	0.1	0.1	0	0	0	0	0	0
	0.1	0.1	0.1	0.1	0.1	0.1	0	0	0	0	0	0
	0	0	0	0.1	0.1	0.1	0	0	0	0	0	0
	0.1	0.1	0.1	0.1	0.1	0.1	0	0	0	0	0	0
	0.1	0.1	0.1	0.1	0.1	0.1	0	0	0	0	0	0
	0.1	0.1	0.1	0	0	0	0	0	0	0	0	0
	0.1	0.1	0.1	1	0.6	0.1	0	0	0	0	0	0
	0.1	0.1	0.1	0.1	0.1	0.1	0	0	0	0	0	0
	0.1	0.1	0.1	0.1	0.1	0.1	0	0	0	0	0	0
	0.1	0.1	0.1	0.1	0.1	0.1	0	0	0	0	0	0
	0.1	0.1	0.1	0.1	0.1	0.1	0	0	0	0	0	0
	0.1	0.1	0.1	0.1	0.1	0.1	0	0	0	0	0	0
	0	0	0	0.2	0.2	0.1	0	0	0	0	0	0
	0.1	0.1	0.1	0	0	0	0	0	0	0	0	0
	0.1	0.1	0.1	0	0	0	0	0	0	0	0	0
	0.1	0.1	0.1	0.1	0.1	0.1	0	0	0	0	0	0
	0.1	0.1	0.1	0	0	0	0	0	0	0	0	0
	0.1	0.1	0.1	0.1	0.1	0.1	0	0	0	0.1	0.1	0.1
	0.1	0.1	0.1	0.1	0.1	0.1	0	0	0	0	0	0
	0.1	0.1	0.1	0.1	0.1	0.1	0	0	0	0	0	0
	0.1	0.1	0.1	0.1	0.1	0.1	0	0	0	0	0	0
	0.1	0.1	0.1	0.1	0.1	0.1	0	0	0	0	0	0
	0	0	0	0	0	0	0	0	0	0	0	0
	0.1	0.1	0.1	0.1	0.1	0.1	0	0	0	0	0	0
	0.1	0.1	0.1	0	0	0	0	0	0	0	0	0
	0.1	0.1	0.1	0.1	0.1	0.1	0	0	0	0	0	0
	0.1	0.1	0.1	0.1	0.1	0.1	0	0	0	0	0	0
	0.1	0.1	0.1	0.1	0.1	0.1	0	0	0	0.1	0.1	0.1
	0.1	0.1	0.1	0.1	0.1	0.1	0	0	0	0	0	0
	0	0	0	0	0	0	0	0	0	0	0	0
	0.1	0.1	0.1	0.1	0.1	0.1	0	0	0	0	0	0
	0.1	0.1	0.1	0.7	0.5	0	0	0	0	0	0	0
	0.1	0.1	0.1	0.1	0.1	0.1	0	0	0	0	0	0
	0.1	0.1	0.1	0.1	0.1	0.1	0	0	0	0	0	0
	0.1	0.1	0.1	0.1	0.1	0.1	0	0	0	0	0	0
	0.1	0.1	0.1	0.1	0.1	0.1	0	0	0	0	0	0
	0.1	0.1	0.1	0.1	0.1	0.1	0.1	0.1	0.1	0	0	0
	0.1	0.1	0.1	0.1	0.1	0.1	0.1	0.1	0.1	0	0	0
	0.1	0.1	0.1	0.1	0.1	0.1	0	0	0	0	0	0
	0.1	0.1	0.1	0	0	0	0	0	0	0	0	0
	0.1	0.1	0.1	0.1	0.1	0.1	0	0	0	0	0	0
	0.1	0.1	0.1	0.1	0.1	0.1	0.1	0.1	0.1	0	0	0
	0.1	0.1	0.1	0.1	0.1	0.1	0.1	0.1	0.1	0	0	0
	0	0	0	0.1	0.1	0.1	0	0	0	0	0	0
	0.1	0.1	0.1	0.1	0.1	0.1	0	0	0	0	0	0
	0	0	0	0.1	0.1	0.1	0	0	0	0	0	0
	0.1	0.1	0.1	0.1	0.1	0.1	0	0	0	0	0	0
	0.1	0.1	0.1	0.1	0.1	0.1	0	0	0	0.1	0.1	0.1
	0.1	0.1	0.1	0.1	0.1	0.1	0	0	0	0	0	0
	0.1	0.1	0.1	0.1	0.1	0.1	0	0	0	0	0	0
	0.2	0.2	0.1	0.1	0.1	0.1	0	0	0	0	0	0
	0	0	0	0.1	0.1	0.1	0	0	0	0	0	0
	0.1	0.1	0.1	0.1	0.1	0.1	0	0	0	0	0	0
	0.1	0.1	0.1	0.1	0.1	0.1	0	0	0	0	0	0
	0.1	0.1	0.1	0.1	0.1	0.1	0.1	0.1	0.1	0	0	0
	0.1	0.1	0.1	0	0	0	0	0	0	0	0	0
	0	0	0	0.1	0.1	0.1	0	0	0	0	0	0
	0.2	0.2	0.1	0.1	0.1	0.1	0	0	0	0	0	0
	0.1	0.1	0.1	0.1	0.1	0.1	0	0	0	0	0	0
	0.1	0.1	0.1	0.1	0.1	0.1	0	0	0	0	0	0
	0.1	0.1	0.1	0.1	0.1	0.1	0	0	0	0.1	0.1	0.1
	0.1	0.1	0.1	0.1	0.1	0.1	0	0	0	0	0	0
	0	0	0	0	0	0	0	0	0	0	0	0
	0	0	0	0.1	0.1	0.1	0	0	0	0	0	0
	0.1	0.1	0.1	0.1	0.1	0.1	0	0	0	0	0	0
	0.1	0.1	0.1	0.1	0.1	0.1	0	0	0	0	0	0
	0.1	0.1	0.1	0.1	0.1	0.1	0	0	0	0	0	0
	0.1	0.1	0.1	0	0	0	0	0	0	0	0	0
	0.1	0.1	0.1	0	0	0	0.1	0.1	0.1	0.1	0.1	0.1
	0.1	0.1	0.1	0.1	0.1	0.1	0	0	0	0	0	0
	0	0	0	0.1	0.1	0.1	0	0	0	0	0	0
	0.1	0.1	0.1	0	0	0	0	0	0	0	0	0
	0.1	0.1	0.1	0.1	0.1	0.1	0	0	0	0	0	0
	0.1	0.1	0.1	0.1	0.1	0.1	0.7	0.5	0	0	0	0
	0.1	0.1	0.1	0.2	0.2	0.2	0	0	0	0	0	0
	0.1	0.1	0.1	0.1	0.1	0.1	0	0	0	0	0	0
	0.1	0.1	0.1	0.1	0.1	0.1	0	0	0	0	0	0
	0.1	0.1	0.1	0.1	0.1	0.1	0	0	0	0	0	0
	0.1	0.1	0.1	0.1	0.1	0.1	0	0	0	0	0	0
	0.1	0.1	0.1	0.1	0.1	0.1	0	0	0	0	0	0
	0.1	0.1	0.1	0.1	0.1	0.1	0	0	0	0.1	0.1	0.1
	0	0	0	0.1	0.1	0.1	0	0	0	0	0	0
	0	0	0	0.1	0.1	0.1	0	0	0	0	0	0
	0.1	0.1	0.1	0.1	0.1	0.1	0	0	0	0	0	0
	0.1	0.1	0.1	0.1	0.1	0.1	0.1	0.1	0.1	0	0	0
	0.1	0.1	0.1	0.1	0.1	0.1	0	0	0	0	0	0
	0	0	0	0.1	0.1	0.1	0	0	0	0	0	0
	0.1	0.1	0.1	0.1	0.1	0.1	0	0	0	0	0	0
	0.1	0.1	0.1	0.1	0.1	0.1	0	0	0	0	0	0
	0.1	0.1	0.1	0.1	0.1	0.1	0	0	0	0	0	0
	0.1	0.1	0.1	0.1	0.1	0.1	0	0	0	0	0	0
	0.1	0.1	0.1	0.1	0.1	0.1	0	0	0	0	0	0
	0.1	0.1	0.1	0.1	0.1	0.1	0	0	0	0	0	0
	0	0	0	0.1	0.1	0.1	0	0	0	0	0	0
	0.1	0.1	0.1	0.1	0.1	0.1	0	0	0	0	0	0
	0.1	0.1	0.1	0.2	0.2	0.1	0	0	0	0	0	0
	0.1	0.1	0.1	0	0	0	0	0	0	0	0	0
	0.1	0.1	0.1	0.1	0.1	0.1	0.1	0.1	0.1	0	0	0
	0.1	0.1	0.1	0.1	0.1	0.1	0	0	0	0	0	0
	0.1	0.1	0.1	0.1	0.1	0.1	0	0	0	0	0	0
	0.1	0.1	0.1	0.1	0.1	0.1	0	0	0	0	0	0
	0.1	0.1	0.1	0.1	0.1	0.1	0	0	0	0	0	0
	0	0	0	0.1	0.1	0.1	0	0	0	0	0	0
	0.1	0.1	0.1	0.1	0.1	0.1	0.1	0.1	0.1	0	0	0
	0.1	0.1	0.1	0.1	0.1	0.1	0	0	0	0	0	0
	0.1	0.1	0.1	0.1	0.1	0.1	0	0	0	0	0	0
	0.1	0.1	0.1	0.1	0.1	0.1	0	0	0	0	0	0
	0.1	0.1	0.1	0	0	0	0	0	0	0	0	0
	0.1	0.1	0.1	0.1	0.1	0.1	0	0	0	0	0	0
	0.1	0.1	0.1	0.1	0.1	0.1	0	0	0	0.2	0.2	0.1
	0.1	0.1	0.1	0.1	0.1	0.1	0	0	0	0	0	0
	0.1	0.1	0.1	0.1	0.1	0.1	0	0	0	0	0	0
	0.1	0.1	0.1	0.1	0.1	0.1	0	0	0	0	0	0
	0.1	0.1	0.1	0.1	0.1	0.1	0.1	0.1	0.1	0	0	0
	0.1	0.1	0.1	0.1	0.1	0.1	0	0	0	0	0	0
	0.1	0.1	0.1	0.1	0.1	0.1	0	0	0	0	0	0
	0.1	0.1	0.1	0.1	0.1	0.1	0	0	0	0.1	0.1	0.1
	0.1	0.1	0.1	0.1	0.1	0.1	0	0	0	0	0	0
	0.1	0.1	0.1	0.1	0.1	0.1	0	0	0	0	0	0
	0.1	0.1	0.1	0.1	0.1	0.1	0	0	0	0	0	0
	0.1	0.1	0.1	0.1	0.1	0.1	0	0	0	0	0	0
	0.1	0.1	0.1	0.1	0.1	0.1	0	0	0	0.1	0.1	0.1
	0.1	0.1	0.1	0.1	0.1	0.1	0	0	0	0	0	0
	0.1	0.1	0.1	0.1	0.1	0.1	0	0	0	0	0	0
	0.1	0.1	0.1	0.1	0.1	0.1	0.1	0.1	0.1	0	0	0
	0.1	0.1	0.1	0.1	0.1	0.1	0	0	0	0	0	0
	0.1	0.1	0.1	0.2	0.2	0.1	0	0	0	0	0	0
	0.1	0.1	0.1	0.1	0.1	0.1	0	0	0	0.1	0.1	0.1
	0.1	0.1	0.1	0.1	0.1	0.1	0	0	0	0	0	0
	0.1	0.1	0.1	0.1	0.1	0.1	0	0	0	0	0	0
	0.1	0.1	0.1	0.1	0.1	0.1	0	0	0	0	0	0
	0.1	0.1	0.1	0.1	0.1	0.1	0	0	0	0	0	0
	0.1	0.1	0.1	1.7	1.2	0.1	0	0	0	0	0	0
	0.1	0.1	0.1	0.1	0.1	0.1	0	0	0	0	0	0
	0.1	0.1	0.1	0.1	0.1	0.1	0	0	0	0	0	0
	0.1	0.1	0.1	0.1	0.1	0.1	0	0	0	0	0	0
	0.1	0.1	0.1	0.1	0.1	0.1	0	0	0	0	0	0
	0.1	0.1	0.1	0.1	0.1	0.1	0	0	0	0	0	0
	0.1	0.1	0.1	0.1	0.1	0.1	0	0	0	0	0	0
	0.1	0.1	0.1	0.1	0.1	0.1	0	0	0	0	0	0
	0.1	0.1	0.1	0.1	0.1	0.1	0	0	0	0	0	0
	0.1	0.1	0.1	0.1	0.1	0.1	0.1	0.1	0.1	0	0	0
	0.1	0.1	0.1	0.1	0.1	0.1	0	0	0	0	0	0
	0.1	0.1	0.1	0.1	0.1	0.1	0	0	0	0	0	0
	0	0	0	0.1	0.1	0.1	0	0	0	0	0	0
	0.1	0.1	0.1	0.4	0.4	0.1	0	0	0	0	0	0
	0.1	0.1	0.1	0.1	0.1	0.1	0	0	0	0	0	0
	0.1	0.1	0.1	0.1	0.1	0.1	0	0	0	0.1	0.1	0.1
	0.1	0.1	0.1	0.1	0.1	0.1	0	0	0	0	0	0
	0.1	0.1	0.1	0.1	0.1	0.1	0	0	0	0	0	0
	0.1	0.1	0.1	0.1	0.1	0.1	0	0	0	0	0	0
	0.1	0.1	0.1	0.1	0.1	0.1	0	0	0	0.1	0.1	0.1
	0.1	0.1	0.1	0.1	0.1	0.1	0	0	0	0	0	0
	0.1	0.1	0.1	0.1	0.1	0.1	0	0	0	0	0	0
	0.1	0.1	0.1	0.1	0.1	0.1	0	0	0	0	0	0
	0.1	0.1	0.1	0.1	0.1	0.1	0	0	0	0	0	0
	0.1	0.1	0.1	0.1	0.1	0.1	0	0	0	0	0	0
	0.1	0.1	0.1	0.1	0.1	0.1	0	0	0	0	0	0
	0.1	0.1	0.1	0.1	0.1	0.1	0	0	0	0	0	0
	0.1	0.1	0.1	0.1	0.1	0.1	0	0	0	0	0	0
	0.1	0.1	0.1	0.1	0.1	0.1	0	0	0	0	0	0
	0.1	0.1	0.1	0.1	0.1	0.1	0	0	0	0	0	0
	0.1	0.1	0.1	0.1	0.1	0.1	0	0	0	0	0	0
	0.1	0.1	0.1	0.1	0.1	0.1	0.1	0.1	0.1	0.1	0.1	0.1
	0.1	0.1	0.1	0.1	0.1	0.1	0	0	0	0	0	0
	0.1	0.1	0.1	0	0	0	0	0	0	0	0	0
	0.1	0.1	0.1	0.1	0.1	0.1	0	0	0	0	0	0
	0.1	0.1	0.1	0.1	0.1	0.1	0	0	0	0.1	0.1	0.1
	0.1	0.1	0.1	0.1	0.1	0.1	0	0	0	0	0	0
	0.1	0.1	0.1	0.4	0.4	0.1	0	0	0	0	0	0
	0.1	0.1	0.1	0.1	0.1	0.1	0	0	0	0	0	0
	0.1	0.1	0.1	1	0.6	0.1	0	0	0	0	0	0
	0.1	0.1	0.1	0.7	0.6	0.1	0	0	0	0	0	0
	0.1	0.1	0.1	0.1	0.1	0.1	0	0	0	0	0	0
	0.1	0.1	0.1	0	0	0	0	0	0	0	0	0
	0.1	0.1	0.1	0.1	0.1	0.1	0	0	0	0	0	0
	0.1	0.1	0.1	0.1	0.1	0.1	0	0	0	0	0	0
	0.1	0.1	0.1	0.1	0.1	0.1	0	0	0	0	0	0
	0.1	0.1	0.1	0.1	0.1	0.1	0	0	0	0	0	0
	0.1	0.1	0.1	0.1	0.1	0.1	0	0	0	0	0	0
	0.1	0.1	0.1	0.1	0.1	0.1	0	0	0	0	0	0
	0	0	0	0.1	0.1	0.1	0	0	0	0	0	0
	0.1	0.1	0.1	0.1	0.1	0.1	0	0	0	0	0	0
	0.1	0.1	0.1	0.1	0.1	0.1	0	0	0	0	0	0
	0.1	0.1	0.1	0.1	0.1	0.1	0	0	0	0	0	0
	0	0	0	0.1	0.1	0.1	0	0	0	0	0	0
	0.1	0.1	0.1	0.1	0.1	0.1	0	0	0	0	0	0
	0.1	0.1	0.1	0.1	0.1	0.1	0	0	0	0	0	0
	0.1	0.1	0.1	0.1	0.1	0.1	0	0	0	0.1	0.1	0.1
	0.1	0.1	0.1	0.1	0.1	0.1	0	0	0	0	0	0
	0.1	0.1	0.1	0.1	0.1	0.1	0.2	0.2	0.1	0	0	0
	0.1	0.1	0.1	0.1	0.1	0.1	0	0	0	0	0	0
	0.1	0.1	0.1	0.1	0.1	0.1	0	0	0	0	0	0
	0.1	0.1	0.1	0.1	0.1	0.1	0.1	0.1	0.1	0	0	0
	0.1	0.1	0.1	0.1	0.1	0.1	0	0	0	0	0	0
	0.1	0.1	0.1	1	0.7	0.1	0	0	0	0.1	0.1	0.1
	0.1	0.1	0.1	0.1	0.1	0.1	0	0	0	0	0	0
	0.1	0.1	0.1	0	0	0	0	0	0	0	0	0
	0.1	0.1	0.1	0.1	0.1	0.1	0	0	0	0	0	0
	0.1	0.1	0.1	0	0	0	0	0	0	0	0	0
	0.1	0.1	0.1	0.1	0.1	0.1	0	0	0	0	0	0
	0.1	0.1	0.1	0.1	0.1	0.1	0	0	0	0	0	0
	0.1	0.1	0.1	0.1	0.1	0.1	0	0	0	0	0	0
	0.1	0.1	0.1	0.1	0.1	0.1	0	0	0	0	0	0
	0.1	0.1	0.1	0.1	0.1	0.1	0	0	0	0	0	0
	0.1	0.1	0.1	0.1	0.1	0.1	0	0	0	0	0	0
	0.1	0.1	0.1	0.2	0.2	0.1	0	0	0	0	0	0
	0.1	0.1	0.1	0.1	0.1	0.1	0	0	0	0	0	0
	0.1	0.1	0.1	0.1	0.1	0.1	0	0	0	0	0	0
	0.1	0.1	0.1	0.4	0.4	0.1	0	0	0	0	0	0
	0.1	0.1	0.1	0.1	0.1	0.1	0	0	0	0	0	0
	0.1	0.1	0.1	0.1	0.1	0.1	0	0	0	0	0	0
	0.1	0.1	0.1	0.1	0.1	0.1	0	0	0	0	0	0
	0.1	0.1	0.1	0.1	0.1	0.1	0	0	0	0	0	0
	0.1	0.1	0.1	0.1	0.1	0.1	0	0	0	0	0	0
	0.1	0.1	0.1	0.2	0.2	0.2	0.1	0.1	0.1	0	0	0
	0.1	0.1	0.1	0.1	0.1	0.1	0	0	0	0	0	0
	0.1	0.1	0.1	0.1	0.1	0.1	0	0	0	0	0	0
	0.1	0.1	0.1	0.1	0.1	0.1	0	0	0	0	0	0
	0.1	0.1	0.1	0.1	0.1	0.1	0	0	0	0	0	0
	0.1	0.1	0.1	0	0	0	0	0	0	0	0	0
	0.1	0.1	0.1	0.1	0.1	0.1	0	0	0	0	0	0
	0.1	0.1	0.1	0.1	0.1	0.1	0	0	0	0	0	0
	0.1	0.1	0.1	0.1	0.1	0.1	0	0	0	0	0	0
	0.1	0.1	0.1	0	0	0	0	0	0	0	0	0
	0.1	0.1	0.1	0	0	0	0	0	0	0	0	0
	0.1	0.1	0.1	0.1	0.1	0.1	0	0	0	0	0	0
	0.1	0.1	0.1	0.1	0.1	0.1	0	0	0	0	0	0
	0.1	0.1	0.1	0.1	0.1	0.1	0	0	0	0	0	0
	0.1	0.1	0.1	0.1	0.1	0.1	0	0	0	0	0	0
	0.1	0.1	0.1	0.1	0.1	0.1	0.1	0.1	0.1	0	0	0
	0.1	0.1	0.1	0.1	0.1	0.1	0	0	0	0	0	0
	0.1	0.1	0.1	0.1	0.1	0.1	0	0	0	0	0	0
	0.1	0.1	0.1	0.1	0.1	0.1	0	0	0	0	0	0
	0.1	0.1	0.1	0.1	0.1	0.1	0	0	0	0	0	0
	0.1	0.1	0.1	0.1	0.1	0.1	0	0	0	0	0	0
	0.1	0.1	0.1	0.1	0.1	0.1	0	0	0	0	0	0
	0.1	0.1	0.1	0.1	0.1	0.1	0	0	0	0	0	0
	0.1	0.1	0.1	0.1	0.1	0.1	0	0	0	0	0	0
	0.1	0.1	0.1	0.8	0.6	0.1	0	0	0	0.1	0.1	0.1
	0.1	0.1	0.1	0.1	0.1	0.1	0	0	0	0	0	0
	0.1	0.1	0.1	0.1	0.1	0.1	0	0	0	0	0	0
	0.1	0.1	0.1	0.1	0.1	0.1	0	0	0	0	0	0
	0.1	0.1	0.1	0.1	0.1	0.1	0	0	0	0	0	0
	0.1	0.1	0.1	0.1	0.1	0.1	0	0	0	0	0	0
	0	0	0	0.1	0.1	0.1	0	0	0	0	0	0
	0.1	0.1	0.1	0.1	0.1	0.1	0	0	0	0	0	0
	0.1	0.1	0.1	0.1	0.1	0.1	0	0	0	0	0	0
	0.1	0.1	0.1	0.1	0.1	0.1	0	0	0	0.1	0.1	0.1
	0.1	0.1	0.1	0.1	0.1	0.1	0	0	0	0	0	0
	0.1	0.1	0.1	0.1	0.1	0.1	0	0	0	0	0	0
	0.1	0.1	0.1	0	0	0	0	0	0	0	0	0
	0.1	0.1	0.1	0.1	0.1	0.1	0	0	0	0	0	0
	0.2	0.2	0.2	0.1	0.1	0.1	0	0	0	0	0	0
	0.1	0.1	0.1	0.1	0.1	0.1	0	0	0	0	0	0
	0.1	0.1	0.1	0	0	0	0	0	0	0	0	0
	0.1	0.1	0.1	0.1	0.1	0.1	0	0	0	0	0	0
	0.1	0.1	0.1	0.1	0.1	0.1	0	0	0	0	0	0
	0.1	0.1	0.1	0.1	0.1	0.1	0	0	0	0	0	0
	0.1	0.1	0.1	0.1	0.1	0.1	0	0	0	0	0	0
	0.1	0.1	0.1	0.1	0.1	0.1	0	0	0	0	0	0
	0.1	0.1	0.1	0.1	0.1	0.1	0	0	0	0	0	0
	0.1	0.1	0.1	0.2	0.2	0.1	0	0	0	0	0	0
	0.1	0.1	0.1	0.1	0.1	0.1	0	0	0	0	0	0
	0.1	0.1	0.1	0.1	0.1	0.1	0	0	0	0	0	0
	0.1	0.1	0.1	0.1	0.1	0.1	0	0	0	0.1	0.1	0.1
	0.1	0.1	0.1	0.1	0.1	0.1	0	0	0	0	0	0
	0.1	0.1	0.1	0.1	0.1	0.1	0	0	0	0	0	0
	0.1	0.1	0.1	0.1	0.1	0.1	0	0	0	0	0	0
	0.1	0.1	0.1	0.1	0.1	0.1	0	0	0	0.1	0.1	0.1
	0.2	0.2	0.2	0	0	0	0	0	0	0	0	0
	0.1	0.1	0.1	0.1	0.1	0.1	0	0	0	0	0	0
	0	0	0	0.1	0.1	0.1	0	0	0	0	0	0
	0.1	0.1	0.1	0.1	0.1	0.1	0	0	0	0	0	0
	0.1	0.1	0.1	0.1	0.1	0.1	0	0	0	0	0	0
	0.1	0.1	0.1	0.1	0.1	0.1	0	0	0	0	0	0
	0.1	0.1	0.1	0.1	0.1	0.1	0	0	0	0	0	0
	0.1	0.1	0.1	0.1	0.1	0.1	0	0	0	0.1	0.1	0.1
	0.1	0.1	0.1	0.1	0.1	0.1	0	0	0	0.1	0.1	0.1
	0.1	0.1	0.1	0.1	0.1	0.1	0	0	0	0.1	0.1	0.1
	0.1	0.1	0.1	0.1	0.1	0.1	0	0	0	0	0	0
	0.1	0.1	0.1	0.1	0.1	0.1	0	0	0	0	0	0
	0.2	0.2	0.2	0.1	0.1	0.1	0	0	0	0	0	0
	0	0	0	0.1	0.1	0.1	0	0	0	0	0	0
	0.1	0.1	0.1	0.1	0.1	0.1	0	0	0	0.1	0.1	0.1
	0.1	0.1	0.1	0.1	0.1	0.1	0	0	0	0.1	0.1	0.1
	0.1	0.1	0.1	0.4	0.4	0.1	0	0	0	0	0	0
	0.1	0.1	0.1	0.1	0.1	0.1	0	0	0	0	0	0
	0.1	0.1	0.1	0.1	0.1	0.1	0	0	0	0	0	0
	0.1	0.1	0.1	0.1	0.1	0.1	0	0	0	0	0	0
	0.1	0.1	0.1	0.1	0.1	0.1	0	0	0	0	0	0
	0.1	0.1	0.1	0.1	0.1	0.1	0	0	0	0	0	0
	0.1	0.1	0.1	0.1	0.1	0.1	0	0	0	0	0	0
	0.1	0.1	0.1	0.1	0.1	0.1	0	0	0	0	0	0
	0.1	0.1	0.1	0.1	0.1	0.1	0	0	0	0	0	0
	0.1	0.1	0.1	0.1	0.1	0.1	0	0	0	0	0	0
	0.1	0.1	0.1	0.1	0.1	0.1	0.1	0.1	0.1	0	0	0
	0	0	0	0.1	0.1	0.1	0	0	0	0.1	0.1	0.1
	0.1	0.1	0.1	0	0	0	0.1	0.1	0.1	0	0	0
	0.1	0.1	0.1	0.1	0.1	0.1	0	0	0	0	0	0
	0.1	0.1	0.1	0.1	0.1	0.1	0	0	0	0	0	0
	0.1	0.1	0.1	0.1	0.1	0.1	0	0	0	0	0	0
	0.1	0.1	0.1	0.1	0.1	0.1	0	0	0	0	0	0
	0.1	0.1	0.1	0	0	0	0	0	0	0	0	0
	0.1	0.1	0.1	0.1	0.1	0.1	0	0	0	0	0	0
	0.1	0.1	0.1	0.1	0.1	0.1	0	0	0	0	0	0
	0.1	0.1	0.1	0.1	0.1	0.1	0	0	0	0	0	0
	0.1	0.1	0.1	0.1	0.1	0.1	0	0	0	0	0	0
	0.1	0.1	0.1	0.1	0.1	0.1	0	0	0	0	0	0
	0.1	0.1	0.1	0.1	0.1	0.1	0	0	0	0	0	0
	0.1	0.1	0.1	0	0	0	0.1	0.1	0.1	0	0	0
	0.1	0.1	0.1	0.1	0.1	0.1	0	0	0	0	0	0
	0.1	0.1	0.1	0.1	0.1	0.1	0.1	0.1	0.1	0	0	0
	0.1	0.1	0.1	0.1	0.1	0.1	0	0	0	0	0	0
	0.1	0.1	0.1	0.1	0.1	0.1	0	0	0	0	0	0
	0.1	0.1	0.1	0.1	0.1	0.1	0	0	0	0	0	0
	0.1	0.1	0.1	0.1	0.1	0.1	0	0	0	0	0	0
	0.1	0.1	0.1	0.1	0.1	0.1	0.1	0.1	0.1	0	0	0
	0.1	0.1	0.1	0.1	0.1	0.1	0	0	0	0	0	0
	0.1	0.1	0.1	0.1	0.1	0.1	0	0	0	0	0	0
	0.1	0.1	0.1	0.1	0.1	0.1	0	0	0	0.1	0.1	0.1
	0.1	0.1	0.1	0.1	0.1	0.1	0	0	0	0	0	0
	0.1	0.1	0.1	0.1	0.1	0.1	0	0	0	0	0	0
	0.1	0.1	0.1	0.1	0.1	0.1	0	0	0	0.4	0.4	0.1
	0.1	0.1	0.1	0.1	0.1	0.1	0	0	0	0.1	0.1	0.1
	0.1	0.1	0.1	0.1	0.1	0.1	0	0	0	0	0	0
	0.1	0.1	0.1	0	0	0	0	0	0	0.1	0.1	0.1
	0.1	0.1	0.1	0.1	0.1	0.1	0	0	0	0	0	0
	0.1	0.1	0.1	0.1	0.1	0.1	0	0	0	0	0	0
	0.1	0.1	0.1	0.8	0.6	0.1	0	0	0	0	0	0
	0.1	0.1	0.1	0.1	0.1	0.1	0.1	0.1	0.1	0	0	0
	0.1	0.1	0.1	0.1	0.1	0.1	0	0	0	0	0	0
	0.1	0.1	0.1	0.1	0.1	0.1	0	0	0	0	0	0
	0.1	0.1	0.1	0.1	0.1	0.1	0	0	0	0	0	0
	0	0	0	0.1	0.1	0.1	0	0	0	0	0	0
	0.1	0.1	0.1	0.1	0.1	0.1	0	0	0	0	0	0
	0.1	0.1	0.1	0.1	0.1	0.1	0	0	0	0	0	0
	0.1	0.1	0.1	0.1	0.1	0.1	0	0	0	0	0	0
	0.1	0.1	0.1	0	0	0	0	0	0	0	0	0
	0.1	0.1	0.1	0.1	0.1	0.1	0	0	0	0	0	0
	0.1	0.1	0.1	0.1	0.1	0.1	0	0	0	0	0	0
	0.1	0.1	0.1	0.1	0.1	0.1	0	0	0	0	0	0
	0.1	0.1	0.1	0.1	0.1	0.1	0	0	0	0	0	0
	0.1	0.1	0.1	0.1	0.1	0.1	0	0	0	0	0	0
	0.1	0.1	0.1	0.1	0.1	0.1	0	0	0	0	0	0
	0.1	0.1	0.1	0.1	0.1	0.1	0	0	0	0	0	0
	0.1	0.1	0.1	0	0	0	0	0	0	0	0	0
	0.1	0.1	0.1	0.2	0.2	0.2	0	0	0	0	0	0
	0.1	0.1	0.1	0.1	0.1	0.1	0	0	0	0.1	0.1	0.1
	0.1	0.1	0.1	0.1	0.1	0.1	0	0	0	0	0	0
	0.1	0.1	0.1	0.1	0.1	0.1	0	0	0	0	0	0
	0.1	0.1	0.1	0.1	0.1	0.1	0	0	0	0	0	0
	0.1	0.1	0.1	0.1	0.1	0.1	0	0	0	0	0	0
	0.1	0.1	0.1	0.1	0.1	0.1	0	0	0	0	0	0
	0.1	0.1	0.1	0.1	0.1	0.1	0	0	0	0	0	0
	0.1	0.1	0.1	0.1	0.1	0.1	0	0	0	0	0	0
	0.1	0.1	0.1	0.1	0.1	0.1	0	0	0	0	0	0
	0.3	0.3	0.2	0.1	0.1	0.1	0	0	0	0	0	0
	0.1	0.1	0.1	0.1	0.1	0.1	0	0	0	0	0	0
	0.1	0.1	0.1	0	0	0	0	0	0	0	0	0
	0.1	0.1	0.1	0.1	0.1	0.1	0	0	0	0	0	0
	0.2	0.2	0.2	0.1	0.1	0.1	0	0	0	0	0	0
	0.1	0.1	0.1	0.1	0.1	0.1	0	0	0	0	0	0
	0.1	0.1	0.1	0.1	0.1	0.1	0	0	0	0	0	0
	0.1	0.1	0.1	0.1	0.1	0.1	0	0	0	0	0	0
	0.1	0.1	0.1	0.1	0.1	0.1	0	0	0	0.1	0.1	0.1
	0.1	0.1	0.1	0.1	0.1	0.1	0	0	0	0	0	0
	0.2	0.2	0.2	0.1	0.1	0.1	0.1	0.1	0.1	0	0	0
	0.1	0.1	0.1	0.1	0.1	0.1	0	0	0	0	0	0
	0.1	0.1	0.1	0.1	0.1	0.1	0	0	0	0	0	0
	0.1	0.1	0.1	0.1	0.1	0.1	0	0	0	0	0	0
	0.1	0.1	0.1	0.1	0.1	0.1	0.1	0.1	0.1	0	0	0
	0.1	0.1	0.1	0.1	0.1	0.1	0	0	0	0.1	0.1	0.1
	0.1	0.1	0.1	0.1	0.1	0.1	0.1	0.1	0.1	0	0	0
	0.1	0.1	0.1	0.1	0.1	0.1	0	0	0	0	0	0
	0.1	0.1	0.1	0.1	0.1	0.1	0	0	0	0	0	0
	0.1	0.1	0.1	0.1	0.1	0.1	0	0	0	0.1	0.1	0.1
	0.1	0.1	0.1	0.1	0.1	0.1	0	0	0	0	0	0
	0.1	0.1	0.1	0.1	0.1	0.1	0	0	0	0	0	0
	0.1	0.1	0.1	0.2	0.2	0.2	0	0	0	0	0	0
	0.2	0.2	0.2	0.1	0.1	0.1	0	0	0	0	0	0
	0.1	0.1	0.1	0.1	0.1	0.1	0	0	0	0	0	0
	0.2	0.2	0.2	0.1	0.1	0.1	0	0	0	0	0	0
	0.1	0.1	0.1	0.1	0.1	0.1	0	0	0	0	0	0
	0.1	0.1	0.1	0.1	0.1	0.1	0	0	0	0	0	0
	0.1	0.1	0.1	0.2	0.2	0.2	0	0	0	0	0	0
	0.1	0.1	0.1	0.1	0.1	0.1	0.1	0.1	0.1	0	0	0
	0.1	0.1	0.1	0.1	0.1	0.1	0	0	0	0	0	0
	0.1	0.1	0.1	0.1	0.1	0.1	0	0	0	0.1	0.1	0.1
	0.1	0.1	0.1	0.2	0.2	0.2	0	0	0	0	0	0
	0.1	0.1	0.1	0.1	0.1	0.1	0	0	0	0	0	0
	0.1	0.1	0.1	0	0	0	0	0	0	0	0	0
	0.1	0.1	0.1	0.1	0.1	0.1	0	0	0	0	0	0
	0.1	0.1	0.1	0.1	0.1	0.1	0	0	0	0	0	0
	0.1	0.1	0.1	0.1	0.1	0.1	0	0	0	0	0	0
	0.1	0.1	0.1	0.1	0.1	0.1	0	0	0	0	0	0
	0.2	0.2	0.2	0.1	0.1	0.1	0	0	0	0	0	0
	0.1	0.1	0.1	0.1	0.1	0.1	0	0	0	0	0	0
	0.1	0.1	0.1	0.1	0.1	0.1	0	0	0	0	0	0
	0.1	0.1	0.1	0.1	0.1	0.1	0	0	0	0	0	0
	0.1	0.1	0.1	0.1	0.1	0.1	0.1	0.1	0.1	0	0	0
	0.1	0.1	0.1	0.1	0.1	0.1	0	0	0	0	0	0
	0.1	0.1	0.1	0.1	0.1	0.1	0	0	0	0	0	0
	0.1	0.1	0.1	0.1	0.1	0.1	0	0	0	0	0	0
	0.2	0.2	0.1	0.1	0.1	0.1	0	0	0	0	0	0
	0.1	0.1	0.1	0.1	0.1	0.1	0	0	0	0	0	0
	0.1	0.1	0.1	0.1	0.1	0.1	0	0	0	0	0	0
	0.2	0.2	0.2	0.1	0.1	0.1	0	0	0	0	0	0
	0.1	0.1	0.1	0.1	0.1	0.1	0	0	0	0	0	0
	0.1	0.1	0.1	0.2	0.2	0.2	0	0	0	0	0	0
	0.1	0.1	0.1	0.1	0.1	0.1	0	0	0	0	0	0
	0.1	0.1	0.1	0.1	0.1	0.1	0	0	0	0	0	0
	0.1	0.1	0.1	0.1	0.1	0.1	0	0	0	0	0	0
	0.1	0.1	0.1	0.1	0.1	0.1	0	0	0	0	0	0
	0.1	0.1	0.1	0.1	0.1	0.1	0	0	0	0	0	0
	0.1	0.1	0.1	0.1	0.1	0.1	0	0	0	0	0	0
	0.2	0.2	0.1	0.1	0.1	0.1	0	0	0	0	0	0
	0.1	0.1	0.1	0.1	0.1	0.1	0	0	0	0	0	0
	0.1	0.1	0.1	0.1	0.1	0.1	0	0	0	0	0	0
	0.1	0.1	0.1	0.1	0.1	0.1	0	0	0	0	0	0
	0.1	0.1	0.1	0.1	0.1	0.1	0	0	0	0	0	0
	0.1	0.1	0.1	0.1	0.1	0.1	0	0	0	0	0	0
	0.1	0.1	0.1	0.1	0.1	0.1	0	0	0	0	0	0
	0.1	0.1	0.1	0.1	0.1	0.1	0	0	0	0	0	0
	0.1	0.1	0.1	0.1	0.1	0.1	0	0	0	0	0	0
	0.1	0.1	0.1	0.1	0.1	0.1	0.1	0.1	0.1	0	0	0
	0.1	0.1	0.1	0.1	0.1	0.1	0	0	0	0	0	0
	0.1	0.1	0.1	0.1	0.1	0.1	0	0	0	0	0	0
	0.1	0.1	0.1	0.2	0.2	0.2	0	0	0	0	0	0
	0.1	0.1	0.1	0.1	0.1	0.1	0	0	0	0	0	0
	0.1	0.1	0.1	0.1	0.1	0.1	0	0	0	0	0	0
	0.1	0.1	0.1	0.1	0.1	0.1	0.1	0.1	0.1	0	0	0
	0.1	0.1	0.1	0.1	0.1	0.1	0	0	0	0	0	0
	0.1	0.1	0.1	0.1	0.1	0.1	0	0	0	0	0	0
	0.1	0.1	0.1	0.1	0.1	0.1	0	0	0	0	0	0
	0.1	0.1	0.1	0.1	0.1	0.1	0.1	0.1	0.1	0.4	0.3	0
	0.1	0.1	0.1	0.1	0.1	0.1	0	0	0	0	0	0
	0.1	0.1	0.1	0.1	0.1	0.1	0	0	0	0.1	0.1	0.1
	0.1	0.1	0.1	0.1	0.1	0.1	0.1	0.1	0.1	0	0	0
	0.1	0.1	0.1	0.1	0.1	0.1	0	0	0	0	0	0
	0.1	0.1	0.1	0	0	0	0	0	0	0	0	0
	0.1	0.1	0.1	0.1	0.1	0.1	0	0	0	0	0	0
	0.1	0.1	0.1	0.1	0.1	0.1	0	0	0	0	0	0
	0.1	0.1	0.1	0.1	0.1	0.1	0	0	0	0	0	0
	0.1	0.1	0.1	0.1	0.1	0.1	0	0	0	0.1	0.1	0.1
	0.1	0.1	0.1	0.1	0.1	0.1	0	0	0	0	0	0
	0	0	0	0.1	0.1	0.1	0	0	0	0	0	0
	0.1	0.1	0.1	0.1	0.1	0.1	0	0	0	0	0	0
	0.1	0.1	0.1	1.1	0.7	0.1	0.1	0.1	0.1	0	0	0
	0.1	0.1	0.1	0.2	0.2	0.1	0	0	0	0.1	0.1	0.1
	0.1	0.1	0.1	0.1	0.1	0.1	0	0	0	0	0	0
	0.1	0.1	0.1	0.1	0.1	0.1	0	0	0	0	0	0
	0.1	0.1	0.1	0.1	0.1	0.1	0	0	0	0	0	0
	0.1	0.1	0.1	0.1	0.1	0.1	0	0	0	0	0	0
	0.2	0.2	0.2	0.1	0.1	0.1	0	0	0	0	0	0
	0.1	0.1	0.1	0.1	0.1	0.1	0	0	0	0	0	0
	0.1	0.1	0.1	0.1	0.1	0.1	0	0	0	0	0	0
	0.1	0.1	0.1	0.1	0.1	0.1	0	0	0	0	0	0
	0.1	0.1	0.1	0.2	0.2	0.1	0	0	0	0	0	0
	0.1	0.1	0.1	0	0	0	0	0	0	0.1	0.1	0.1
	0.2	0.2	0.2	0.1	0.1	0.1	0	0	0	0	0	0
	0.1	0.1	0.1	1.1	0.7	0.2	0	0	0	0	0	0
	0.1	0.1	0.1	0.1	0.1	0.1	0	0	0	0	0	0
	0.1	0.1	0.1	0.1	0.1	0.1	0	0	0	0	0	0
	0.1	0.1	0.1	0.1	0.1	0.1	0	0	0	0.1	0.1	0.1
	0.1	0.1	0.1	0.1	0.1	0.1	0	0	0	0	0	0
	0.1	0.1	0.1	0.1	0.1	0.1	0	0	0	0	0	0
	0.1	0.1	0.1	0.1	0.1	0.1	0	0	0	0	0	0
	0.1	0.1	0.1	0.1	0.1	0.1	0	0	0	0	0	0
	0.1	0.1	0.1	0.1	0.1	0.1	0	0	0	0	0	0
	0.1	0.1	0.1	0.1	0.1	0.1	0	0	0	0.1	0.1	0
	0.1	0.1	0.1	0.1	0.1	0.1	0	0	0	0	0	0
	0.1	0.1	0.1	0.1	0.1	0.1	0	0	0	0.1	0.1	0.1
	0.1	0.1	0.1	0.1	0.1	0.1	0	0	0	0.1	0.1	0.1
	0.1	0.1	0.1	0.1	0.1	0.1	0.1	0.1	0.1	0	0	0
	0.2	0.2	0.2	0.1	0.1	0.1	0.1	0.1	0.1	0	0	0
	0.1	0.1	0.1	0.2	0.2	0.2	0	0	0	0	0	0
	0.1	0.1	0.1	0.1	0.1	0.1	0	0	0	0	0	0
	0.1	0.1	0.1	0.1	0.1	0.1	0	0	0	0	0	0
	0.1	0.1	0.1	0.1	0.1	0.1	0	0	0	0	0	0
	0.1	0.1	0.1	0.1	0.1	0.1	0	0	0	0	0	0
	0.1	0.1	0.1	0.1	0.1	0.1	0	0	0	0	0	0
	0.1	0.1	0.1	0.1	0.1	0.1	0	0	0	0	0	0
	0.1	0.1	0.1	0.1	0.1	0.1	0	0	0	0.1	0.1	0.1
	0.1	0.1	0.1	0.1	0.1	0.1	0	0	0	0.1	0.1	0.1
	0.1	0.1	0.1	0.1	0.1	0.1	0	0	0	0	0	0
	0.1	0.1	0.1	0.1	0.1	0.1	0	0	0	0	0	0
	0.1	0.1	0.1	0.1	0.1	0.1	0	0	0	0.1	0.1	0.1
	0.2	0.2	0.2	0.1	0.1	0.1	0	0	0	0	0	0
	0.1	0.1	0.1	0.2	0.2	0.2	0	0	0	0	0	0
	0.1	0.1	0.1	0.2	0.2	0.2	0	0	0	0	0	0
	0.1	0.1	0.1	0.1	0.1	0.1	0	0	0	0	0	0
	0.1	0.1	0.1	0.1	0.1	0.1	0	0	0	0	0	0
	0.1	0.1	0.1	0.1	0.1	0.1	0	0	0	0.1	0.1	0.1
	0.1	0.1	0.1	0.2	0.2	0.1	0.1	0.1	0.1	0	0	0
	0.2	0.2	0.2	0.1	0.1	0.1	0	0	0	0	0	0
	0.1	0.1	0.1	0.2	0.2	0.2	0	0	0	0	0	0
	0.1	0.1	0.1	0.2	0.2	0.2	0	0	0	0	0	0
	0.1	0.1	0.1	0.1	0.1	0.1	0	0	0	0.1	0.1	0.1
	0.1	0.1	0.1	0.1	0.1	0.1	0	0	0	0	0	0
	0.1	0.1	0.1	0.1	0.1	0.1	0	0	0	0	0	0
	0.1	0.1	0.1	0.1	0.1	0.1	0	0	0	0	0	0
	0.1	0.1	0.1	0.1	0.1	0.1	0	0	0	0	0	0
	0.1	0.1	0.1	0.1	0.1	0.1	0	0	0	0	0	0
	0.1	0.1	0.1	0.1	0.1	0.1	0	0	0	0	0	0
	0.1	0.1	0.1	0.1	0.1	0.1	0	0	0	0	0	0
	0.2	0.2	0.2	0.1	0.1	0.1	0	0	0	0	0	0
	0.1	0.1	0.1	0.1	0.1	0.1	0	0	0	0	0	0
	0.1	0.1	0.1	0.1	0.1	0.1	0	0	0	0	0	0
	0.1	0.1	0.1	0.2	0.2	0.2	0	0	0	0	0	0
	0.1	0.1	0.1	0.3	0.3	0.2	0	0	0	0	0	0
	0.2	0.2	0.2	0.1	0.1	0.1	0.1	0.1	0.1	0	0	0
	0.1	0.1	0.1	0.1	0.1	0.1	0	0	0	0	0	0
	0.1	0.1	0.1	0.1	0.1	0.1	0	0	0	0	0	0
	0.1	0.1	0.1	0.1	0.1	0.1	0	0	0	0	0	0
	0.1	0.1	0.1	0.1	0.1	0.1	0.1	0.1	0.1	0	0	0
	0.1	0.1	0.1	0.1	0.1	0.1	0	0	0	0	0	0
	0.1	0.1	0.1	0.1	0.1	0.1	0.1	0.1	0.1	0	0	0
	0.1	0.1	0.1	0.1	0.1	0.1	0	0	0	0	0	0
	0.1	0.1	0.1	0.1	0.1	0.1	0.1	0.1	0.1	0	0	0
	0.1	0.1	0.1	0.1	0.1	0.1	0	0	0	0.1	0.1	0.1
	0.1	0.1	0.1	0.1	0.1	0.1	0	0	0	0	0	0
	0.1	0.1	0.1	0.1	0.1	0.1	0	0	0	0.1	0.1	0.1
	0.1	0.1	0.1	0.1	0.1	0.1	0	0	0	0	0	0
	0.1	0.1	0.1	0.1	0.1	0.1	0	0	0	0	0	0
	0.1	0.1	0.1	0.1	0.1	0.1	0	0	0	0	0	0
	0.1	0.1	0.1	0.1	0.1	0.1	0	0	0	0	0	0
	0.1	0.1	0.1	0.2	0.2	0.2	0	0	0	0	0	0
	0.1	0.1	0.1	0.1	0.1	0.1	0	0	0	0	0	0
	0.1	0.1	0.1	0.1	0.1	0.1	0	0	0	0	0	0
	0.1	0.1	0.1	0.1	0.1	0.1	0	0	0	0	0	0
	0.1	0.1	0.1	1	0.7	0.2	0	0	0	0	0	0
	0.1	0.1	0.1	0.2	0.2	0.2	0	0	0	0	0	0
	0.1	0.1	0.1	0.1	0.1	0.1	0.1	0.1	0.1	0	0	0
	0.1	0.1	0.1	0.1	0.1	0.1	0	0	0	0	0	0
	0.1	0.1	0.1	0.1	0.1	0.1	0	0	0	0	0	0
	0.1	0.1	0.1	0.2	0.2	0.2	0	0	0	0	0	0
	0.2	0.2	0.1	0.1	0.1	0.1	0	0	0	0	0	0
	0.1	0.1	0.1	0.1	0.1	0.1	0	0	0	0	0	0
	0.1	0.1	0.1	0.1	0.1	0.1	0	0	0	0	0	0
	0.1	0.1	0.1	0.1	0.1	0.1	0	0	0	0	0	0
	0.1	0.1	0.1	0.1	0.1	0.1	0	0	0	0	0	0
	0.2	0.2	0.2	0.1	0.1	0.1	0	0	0	0	0	0
	0.1	0.1	0.1	0.8	0.6	0.1	0	0	0	0	0	0
	0.2	0.2	0.2	0.1	0.1	0.1	0	0	0	0	0	0
	0.1	0.1	0.1	0.1	0.1	0.1	0	0	0	0	0	0
	0.1	0.1	0.1	0.2	0.2	0.2	0	0	0	0	0	0
	0.1	0.1	0.1	0.2	0.2	0.2	0	0	0	0	0	0
	0.1	0.1	0.1	0.1	0.1	0.1	0	0	0	0	0	0
	0.1	0.1	0.1	0.1	0.1	0.1	0	0	0	0	0	0
	0.1	0.1	0.1	0.1	0.1	0.1	0	0	0	0.1	0.1	0.1
	0.1	0.1	0.1	0.2	0.2	0.2	0.1	0.1	0.1	0.1	0.1	0.1
	0.1	0.1	0.1	0.1	0.1	0.1	0.1	0.1	0.1	0	0	0
	0.1	0.1	0.1	0.1	0.1	0.1	0	0	0	0	0	0
	0.1	0.1	0.1	0.1	0.1	0.1	0	0	0	0	0	0
	0.1	0.1	0.1	0.1	0.1	0.1	0	0	0	0	0	0
	0.1	0.1	0.1	0.1	0.1	0.1	0	0	0	0	0	0
	0.2	0.2	0.2	0.1	0.1	0.1	0	0	0	0	0	0
	0.1	0.1	0.1	0.1	0.1	0.1	0	0	0	0	0	0
	0.1	0.1	0.1	0.1	0.1	0.1	0	0	0	0	0	0
	0.1	0.1	0.1	0.1	0.1	0.1	0	0	0	0	0	0
	0.1	0.1	0.1	0.1	0.1	0.1	0	0	0	0	0	0
	0.1	0.1	0.1	0.1	0.1	0.1	0	0	0	0	0	0
	0.1	0.1	0.1	0.1	0.1	0.1	0	0	0	0	0	0
	0.1	0.1	0.1	0.1	0.1	0.1	0	0	0	0	0	0
	0.1	0.1	0.1	0.1	0.1	0.1	0	0	0	0	0	0
	0.1	0.1	0.1	0.1	0.1	0.1	0	0	0	0	0	0
	0.1	0.1	0.1	0.1	0.1	0.1	0	0	0	0	0	0
	0.1	0.1	0.1	0.4	0.4	0.1	0.1	0.1	0.1	0.1	0.1	0.1
	0.1	0.1	0.1	0.1	0.1	0.1	0	0	0	0	0	0
	0.1	0.1	0.1	0.1	0.1	0.1	0	0	0	0	0	0
	0.1	0.1	0.1	0.2	0.2	0.2	0	0	0	0	0	0
	0.1	0.1	0.1	0.1	0.1	0.1	0	0	0	0.1	0.1	0.1
	0.1	0.1	0.1	0.1	0.1	0.1	0	0	0	0	0	0
	0.2	0.2	0.2	0.1	0.1	0.1	0	0	0	0	0	0
	0.1	0.1	0.1	0.8	0.6	0.1	0	0	0	0	0	0
	0.1	0.1	0.1	0.1	0.1	0.1	0.1	0.1	0.1	0	0	0
	0.1	0.1	0.1	0.2	0.2	0.2	0	0	0	0	0	0
	0.1	0.1	0.1	0.1	0.1	0.1	0	0	0	0.1	0.1	0.1
	0.1	0.1	0.1	0.1	0.1	0.1	0	0	0	0	0	0
	0.1	0.1	0.1	0.5	0.4	0.1	0.1	0.1	0.1	0	0	0
	0.1	0.1	0.1	0.1	0.1	0.1	0	0	0	0	0	0
	0.1	0.1	0.1	0.1	0.1	0.1	0	0	0	0	0	0
	0.2	0.2	0.2	0.1	0.1	0.1	0	0	0	0.1	0.1	0.1
	0.1	0.1	0.1	0.1	0.1	0.1	0	0	0	0	0	0
	0.1	0.1	0.1	0.2	0.2	0.2	0	0	0	0	0	0
	0.1	0.1	0.1	0.1	0.1	0.1	0.1	0.1	0.1	0	0	0
	0.2	0.2	0.2	0.1	0.1	0.1	0	0	0	0	0	0
	0.1	0.1	0.1	0.1	0.1	0.1	0	0	0	0	0	0
	0.1	0.1	0.1	0.1	0.1	0.1	0.1	0.1	0.1	0	0	0
	0	0	0	0.2	0.2	0.2	0	0	0	0	0	0
	0.2	0.2	0.1	0.2	0.2	0.2	0	0	0	0	0	0
	0.1	0.1	0.1	0.2	0.2	0.1	0	0	0	0	0	0
	0.1	0.1	0.1	0.1	0.1	0.1	0	0	0	0	0	0
	0.1	0.1	0.1	0.1	0.1	0.1	0	0	0	0.1	0.1	0.1
	0.1	0.1	0.1	0.1	0.1	0.1	0	0	0	0	0	0
	0.1	0.1	0.1	0.1	0.1	0.1	0	0	0	0	0	0
	0.1	0.1	0.1	0.5	0.4	0.1	0	0	0	0	0	0
	0.1	0.1	0.1	0.1	0.1	0.1	0	0	0	0.1	0.1	0.1
	0.1	0.1	0.1	0.1	0.1	0.1	0	0	0	0.1	0.1	0.1
	0.1	0.1	0.1	0.2	0.2	0.1	0	0	0	0.1	0.1	0.1
	0.1	0.1	0.1	0.1	0.1	0.1	0	0	0	0	0	0
	0.1	0.1	0.1	0.2	0.2	0.2	0	0	0	0.1	0.1	0.1
	0.1	0.1	0.1	0.1	0.1	0.1	0	0	0	0	0	0
	0.1	0.1	0.1	0.2	0.2	0.2	0	0	0	0	0	0
	0.1	0.1	0.1	0.1	0.1	0.1	0	0	0	0	0	0
	0.1	0.1	0.1	0.1	0.1	0.1	0	0	0	0	0	0
	0.1	0.1	0.1	0.1	0.1	0.1	0	0	0	0.2	0.2	0.1
	0.1	0.1	0.1	0.1	0.1	0.1	0	0	0	0	0	0
	0.2	0.2	0.2	0.1	0.1	0.1	0	0	0	0	0	0
	0.1	0.1	0.1	0.1	0.1	0.1	0	0	0	0	0	0
	0.1	0.1	0.1	0.1	0.1	0.1	0	0	0	0.1	0.1	0.1
	0.1	0.1	0.1	0.1	0.1	0.1	0	0	0	0	0	0
	0.1	0.1	0.1	0.1	0.1	0.1	0	0	0	0.1	0.1	0.1
	0.1	0.1	0.1	0.1	0.1	0.1	0	0	0	0	0	0
	0.2	0.2	0.2	0.1	0.1	0.1	0	0	0	0	0	0
	0.1	0.1	0.1	0.1	0.1	0.1	0	0	0	0	0	0
	0.1	0.1	0.1	0.1	0.1	0.1	0	0	0	0	0	0
	0.1	0.1	0.1	0.1	0.1	0.1	0	0	0	0.1	0.1	0.1
	0.2	0.2	0.2	0.1	0.1	0.1	0	0	0	0	0	0
	0.1	0.1	0.1	0.1	0.1	0.1	0	0	0	0	0	0
	0.1	0.1	0.1	0.2	0.2	0.1	0	0	0	0	0	0
	0.1	0.1	0.1	0.1	0.1	0.1	0	0	0	0	0	0
	0.1	0.1	0.1	0.1	0.1	0.1	0	0	0	0	0	0
	0.2	0.2	0.2	0.1	0.1	0.1	0	0	0	0.1	0.1	0.1
	0.1	0.1	0.1	0.1	0.1	0.1	0	0	0	0	0	0
	0.1	0.1	0.1	0.2	0.2	0.2	0	0	0	0	0	0
	0.1	0.1	0.1	0.1	0.1	0.1	0	0	0	0	0	0
	0.1	0.1	0.1	0.1	0.1	0.1	0	0	0	0.1	0.1	0.1
	0.1	0.1	0.1	0.1	0.1	0.1	0	0	0	0	0	0
	0.1	0.1	0.1	0.2	0.2	0.2	0	0	0	0	0	0
	0.1	0.1	0.1	0.1	0.1	0.1	0	0	0	0	0	0
	0.1	0.1	0.1	0.1	0.1	0.1	0	0	0	0	0	0
	0.1	0.1	0.1	0.1	0.1	0.1	0	0	0	0.1	0.1	0.1
	0.1	0.1	0.1	0.1	0.1	0.1	0	0	0	0.1	0.1	0.1
	0.1	0.1	0.1	0.1	0.1	0.1	0	0	0	0.1	0.1	0.1
	0.1	0.1	0.1	0.1	0.1	0.1	0	0	0	0	0	0
	0.1	0.1	0.1	0.1	0.1	0.1	0	0	0	0.1	0.1	0.1
	0.1	0.1	0.1	0.1	0.1	0.1	0	0	0	0	0	0
	0.2	0.2	0.2	0.1	0.1	0.1	0	0	0	0	0	0
	0.1	0.1	0.1	0.1	0.1	0.1	0	0	0	0.1	0.1	0.1
	0.1	0.1	0.1	0.1	0.1	0.1	0	0	0	0	0	0
	0.1	0.1	0.1	0.1	0.1	0.1	0	0	0	0	0	0
	0.1	0.1	0.1	0.1	0.1	0.1	0	0	0	0.1	0.1	0.1
	0.1	0.1	0.1	0.1	0.1	0.1	0	0	0	0.1	0.1	0.1
	0.2	0.2	0.2	0.1	0.1	0.1	0	0	0	0	0	0
	0.1	0.1	0.1	0.1	0.1	0.1	0	0	0	0	0	0
	0.1	0.1	0.1	0.1	0.1	0.1	0	0	0	0	0	0
	0.2	0.2	0.2	0.1	0.1	0.1	0	0	0	0	0	0
	0.1	0.1	0.1	0.1	0.1	0.1	0	0	0	0.1	0.1	0.1
	0.2	0.2	0.2	0.1	0.1	0.1	0	0	0	0	0	0
	0.1	0.1	0.1	0.1	0.1	0.1	0	0	0	0	0	0
	0.2	0.2	0.2	0.2	0.2	0.2	0	0	0	0	0	0
	0.1	0.1	0.1	0.1	0.1	0.1	0	0	0	0	0	0
	0.1	0.1	0.1	0.1	0.1	0.1	0	0	0	0	0	0
	0.1	0.1	0.1	0.1	0.1	0.1	0	0	0	0	0	0
	0.2	0.2	0.2	0.1	0.1	0.1	0	0	0	0	0	0
	0.1	0.1	0.1	0.1	0.1	0.1	0	0	0	0	0	0
	0.1	0.1	0.1	0.1	0.1	0.1	0	0	0	0	0	0
	0.2	0.2	0.2	0.2	0.2	0.2	0	0	0	0.1	0.1	0.1
	0.1	0.1	0.1	0.1	0.1	0.1	0	0	0	0	0	0
	0.1	0.1	0.1	0.3	0.3	0.2	0	0	0	0	0	0
	0.1	0.1	0.1	0.1	0.1	0.1	0	0	0	0	0	0
	0.2	0.2	0.2	0.1	0.1	0.1	0	0	0	0.1	0.1	0.1
	0.1	0.1	0.1	0.1	0.1	0.1	0	0	0	0.1	0.1	0.1
	0.1	0.1	0.1	0.1	0.1	0.1	0.1	0.1	0.1	0	0	0
	0.1	0.1	0.1	0.1	0.1	0.1	0	0	0	0	0	0
	0.1	0.1	0.1	0.1	0.1	0.1	0	0	0	0.1	0.1	0.1
	0.1	0.1	0.1	0.1	0.1	0.1	0	0	0	0.1	0.1	0.1
	0.1	0.1	0.1	0.1	0.1	0.1	0	0	0	0	0	0
	0.1	0.1	0.1	0.1	0.1	0.1	0	0	0	0	0	0
	0.1	0.1	0.1	0.1	0.1	0.1	0	0	0	0	0	0
	0.1	0.1	0.1	0.1	0.1	0.1	0	0	0	0	0	0
	0.1	0.1	0.1	0.1	0.1	0.1	0	0	0	0	0	0
	0.1	0.1	0.1	0.1	0.1	0.1	0	0	0	0	0	0
	0.1	0.1	0.1	0.1	0.1	0.1	0	0	0	0.1	0.1	0.1
	0.1	0.1	0.1	0.1	0.1	0.1	0	0	0	0.1	0.1	0.1
	0.2	0.2	0.2	0.2	0.2	0.1	0	0	0	0	0	0
	0.2	0.2	0.2	0.1	0.1	0.1	0	0	0	0	0	0
	0.1	0.1	0.1	0.1	0.1	0.1	0	0	0	0	0	0
	0.1	0.1	0.1	0.2	0.2	0.2	0	0	0	0	0	0
	0.1	0.1	0.1	0.1	0.1	0.1	0	0	0	0	0	0
	0.1	0.1	0.1	0.1	0.1	0.1	0	0	0	0	0	0
	0.1	0.1	0.1	0.1	0.1	0.1	0	0	0	0	0	0
	0.1	0.1	0.1	0.1	0.1	0.1	0	0	0	0.1	0.1	0.1
	0.2	0.2	0.2	0.1	0.1	0.1	0	0	0	0.1	0.1	0.1
	0.1	0.1	0.1	0.1	0.1	0.1	0	0	0	0	0	0
	0.1	0.1	0.1	0.1	0.1	0.1	0.1	0.1	0.1	0.1	0.1	0.1
	0.2	0.2	0.2	0.1	0.1	0.1	0	0	0	0	0	0
	0.1	0.1	0.1	0.2	0.2	0.2	0	0	0	0	0	0
	0.1	0.1	0.1	0.1	0.1	0.1	0	0	0	0	0	0
	0.1	0.1	0.1	0.2	0.2	0.2	0	0	0	0	0	0
	0.2	0.2	0.1	0.1	0.1	0.1	0	0	0	0	0	0
	0.1	0.1	0.1	0.1	0.1	0.1	0	0	0	0	0	0
	0.2	0.2	0.2	0.1	0.1	0.1	0	0	0	0	0	0
	0.1	0.1	0.1	0.1	0.1	0.1	0	0	0	0	0	0
	0.1	0.1	0.1	0.1	0.1	0.1	0	0	0	0	0	0
	0.2	0.2	0.2	0.1	0.1	0.1	0.1	0.1	0.1	0	0	0
	0.1	0.1	0.1	0.1	0.1	0.1	0	0	0	0.1	0.1	0.1
	0.1	0.1	0.1	0.1	0.1	0.1	0	0	0	0	0	0
	0.1	0.1	0.1	0.1	0.1	0.1	0	0	0	0	0	0
	0.2	0.2	0.2	0.1	0.1	0.1	0	0	0	0	0	0
	0.1	0.1	0.1	0.1	0.1	0.1	0	0	0	0	0	0
	0.1	0.1	0.1	0.1	0.1	0.1	0	0	0	0	0	0
	0.2	0.2	0.2	0.1	0.1	0.1	0	0	0	0.1	0.1	0.1
	0.1	0.1	0.1	0.1	0.1	0.1	0	0	0	0	0	0
	0.1	0.1	0.1	0.1	0.1	0.1	0	0	0	0	0	0
	0.1	0.1	0.1	0.1	0.1	0.1	0	0	0	0	0	0
	0.1	0.1	0.1	0.1	0.1	0.1	0	0	0	0.1	0.1	0.1
	0.1	0.1	0.1	0.1	0.1	0.1	0	0	0	0	0	0
	0.1	0.1	0.1	0.1	0.1	0.1	0	0	0	0.1	0.1	0.1
	0.2	0.2	0.2	0.1	0.1	0.1	0	0	0	0	0	0
	0.1	0.1	0.1	0.1	0.1	0.1	0	0	0	0	0	0
	0.1	0.1	0.1	0.1	0.1	0.1	0	0	0	0.1	0.1	0.1
	0.1	0.1	0.1	0.1	0.1	0.1	0	0	0	0.1	0.1	0.1
	0.2	0.2	0.2	0.1	0.1	0.1	0	0	0	0	0	0
	0.1	0.1	0.1	0.1	0.1	0.1	0	0	0	0	0	0
	0.1	0.1	0.1	0.1	0.1	0.1	0	0	0	0	0	0
	0.1	0.1	0.1	0.1	0.1	0.1	0	0	0	0.1	0.1	0.1
	0.1	0.1	0.1	0.1	0.1	0.1	0	0	0	0.1	0.1	0.1
	0.1	0.1	0.1	0.1	0.1	0.1	0	0	0	0	0	0
	0.1	0.1	0.1	0.2	0.2	0.2	0	0	0	0	0	0
	0.1	0.1	0.1	0.1	0.1	0.1	0	0	0	0	0	0
	0.1	0.1	0.1	0.1	0.1	0.1	0	0	0	0.1	0.1	0.1
	0.1	0.1	0.1	0.1	0.1	0.1	0	0	0	0	0	0
	0.1	0.1	0.1	0.1	0.1	0.1	0	0	0	0.1	0.1	0.1
	0.1	0.1	0.1	0.1	0.1	0.1	0	0	0	0	0	0
	0.1	0.1	0.1	0.2	0.2	0.1	0	0	0	0	0	0
	0.1	0.1	0.1	0.2	0.2	0.2	0	0	0	0.1	0.1	0.1
	0.1	0.1	0.1	0.1	0.1	0.1	0	0	0	0.1	0.1	0.1
	0.2	0.2	0.2	0.1	0.1	0.1	0	0	0	0.1	0.1	0.1
	0.1	0.1	0.1	0.1	0.1	0.1	0.2	0.2	0.1	0	0	0
	0.2	0.2	0.2	0.1	0.1	0.1	0	0	0	0	0	0
	0.1	0.1	0.1	0.1	0.1	0.1	0	0	0	0	0	0
	0.1	0.1	0.1	0.1	0.1	0.1	0	0	0	0	0	0
	0.1	0.1	0.1	0.1	0.1	0.1	0	0	0	0	0	0
	0.1	0.1	0.1	0.3	0.3	0.2	0	0	0	0	0	0
	0.1	0.1	0.1	0.1	0.1	0.1	0	0	0	0	0	0
	0.1	0.1	0.1	0.2	0.2	0.2	0	0	0	0	0	0
	0.1	0.1	0.1	0.1	0.1	0.1	0	0	0	0.1	0.1	0.1
	0.1	0.1	0.1	0.1	0.1	0.1	0	0	0	0	0	0
	0.1	0.1	0.1	0.1	0.1	0.1	0	0	0	0	0	0
	0.1	0.1	0.1	0.1	0.1	0.1	0	0	0	0	0	0
	0.1	0.1	0.1	0.1	0.1	0.1	0	0	0	0.1	0.1	0.1
	0.2	0.2	0.2	0.1	0.1	0.1	0	0	0	0.1	0.1	0.1
	0.1	0.1	0.1	0.1	0.1	0.1	0	0	0	0	0	0
	0.1	0.1	0.1	0.1	0.1	0.1	0	0	0	0	0	0
	0.1	0.1	0.1	0.1	0.1	0.1	0	0	0	0	0	0
	0.1	0.1	0.1	0.1	0.1	0.1	0	0	0	0	0	0
	0.1	0.1	0.1	0.1	0.1	0.1	0	0	0	0	0	0
	0.1	0.1	0.1	0.1	0.1	0.1	0	0	0	0	0	0
	0.1	0.1	0.1	0.2	0.2	0.2	0	0	0	0	0	0
	0.1	0.1	0.1	0.1	0.1	0.1	0	0	0	0	0	0
	0.1	0.1	0.1	0.1	0.1	0.1	0	0	0	0	0	0
	0.1	0.1	0.1	0.2	0.2	0.2	0	0	0	0	0	0
	0.1	0.1	0.1	0.1	0.1	0.1	0	0	0	0.1	0.1	0.1
	0.1	0.1	0.1	0.1	0.1	0.1	0	0	0	0	0	0
	0.1	0.1	0.1	0.8	0.7	0.2	0	0	0	0	0	0
	0.1	0.1	0.1	0.1	0.1	0.1	0	0	0	0.1	0.1	0.1
	0.1	0.1	0.1	0.1	0.1	0.1	0	0	0	0	0	0
	0.1	0.1	0.1	0.2	0.2	0.2	0	0	0	0.1	0.1	0.1
	0.1	0.1	0.1	0.1	0.1	0.1	0	0	0	0.1	0.1	0.1
	0.1	0.1	0.1	0.1	0.1	0.1	0	0	0	0	0	0
	0.1	0.1	0.1	0.1	0.1	0.1	0	0	0	0.1	0.1	0.1
	0.1	0.1	0.1	0.1	0.1	0.1	0	0	0	0	0	0
	0.2	0.2	0.2	0.1	0.1	0.1	0	0	0	0	0	0
	0.1	0.1	0.1	0.1	0.1	0.1	0	0	0	0.1	0.1	0.1
	0.1	0.1	0.1	0.1	0.1	0.1	0	0	0	0	0	0
	0.1	0.1	0.1	0.2	0.2	0.2	0	0	0	0	0	0
	0.1	0.1	0.1	0.1	0.1	0.1	0	0	0	0.1	0.1	0.1
	0.1	0.1	0.1	0.2	0.2	0.1	0	0	0	0	0	0
	0.1	0.1	0.1	0.1	0.1	0.1	0	0	0	0.1	0.1	0.1
	0.2	0.2	0.2	0.1	0.1	0.1	0	0	0	0	0	0
	0.1	0.1	0.1	0.2	0.2	0.2	0	0	0	0	0	0
	0.1	0.1	0.1	0.1	0.1	0.1	0	0	0	0	0	0
	0.1	0.1	0.1	0.1	0.1	0.1	0	0	0	0.1	0.1	0.1
	0.1	0.1	0.1	0.1	0.1	0.1	0	0	0	0	0	0
	0.1	0.1	0.1	0.1	0.1	0.1	0	0	0	0	0	0
	0.1	0.1	0.1	0.1	0.1	0.1	0	0	0	0	0	0
	0.1	0.1	0.1	0.1	0.1	0.1	0	0	0	0	0	0
	0.1	0.1	0.1	0.1	0.1	0.1	0	0	0	0.1	0.1	0.1
	0.2	0.2	0.2	0.1	0.1	0.1	0	0	0	0	0	0
	0.1	0.1	0.1	0.1	0.1	0.1	0	0	0	0	0	0
	0.1	0.1	0.1	0.1	0.1	0.1	0	0	0	0	0	0
	0.1	0.1	0.1	0.1	0.1	0.1	0	0	0	0	0	0
	0.1	0.1	0.1	0.2	0.2	0.2	0	0	0	0	0	0
	0.2	0.2	0.2	0.1	0.1	0.1	0	0	0	0	0	0
	0.1	0.1	0.1	0.1	0.1	0.1	0	0	0	0	0	0
	0.2	0.2	0.2	0.1	0.1	0.1	0	0	0	0	0	0
	0.2	0.2	0.2	0.1	0.1	0.1	0	0	0	0.1	0.1	0.1
	0.1	0.1	0.1	0.1	0.1	0.1	0	0	0	0	0	0
	0.1	0.1	0.1	0.1	0.1	0.1	0	0	0	0.1	0.1	0.1
	0.1	0.1	0.1	0.1	0.1	0.1	0	0	0	0	0	0
	0.2	0.2	0.2	0.1	0.1	0.1	0	0	0	0	0	0
	0.1	0.1	0.1	0.1	0.1	0.1	0	0	0	0.1	0.1	0.1
	0.1	0.1	0.1	0.1	0.1	0.1	0	0	0	0.1	0.1	0.1
	0.2	0.2	0.2	0.2	0.2	0.2	0	0	0	0	0	0
	0.1	0.1	0.1	0.2	0.2	0.1	0	0	0	0	0	0
	0.1	0.1	0.1	0.1	0.1	0.1	0	0	0	0	0	0
	0.1	0.1	0.1	0.1	0.1	0.1	0	0	0	0.1	0.1	0.1
	0.2	0.2	0.2	0.2	0.2	0.2	0	0	0	0.1	0.1	0.1
	0.2	0.2	0.2	0.1	0.1	0.1	0	0	0	0.1	0.1	0.1
	0.2	0.2	0.2	0.2	0.2	0.2	0.1	0.1	0.1	0	0	0
	0.1	0.1	0.1	0.1	0.1	0.1	0	0	0	0	0	0
	0.1	0.1	0.1	0.2	0.2	0.2	0	0	0	0	0	0
	0.1	0.1	0.1	0.1	0.1	0.1	0	0	0	0	0	0
	0.1	0.1	0.1	0.2	0.2	0.2	0	0	0	0	0	0
	0.1	0.1	0.1	0.1	0.1	0.1	0	0	0	0	0	0
	0.1	0.1	0.1	0.1	0.1	0.1	0	0	0	0.1	0.1	0.1
	0.1	0.1	0.1	0.2	0.2	0.2	0	0	0	0.1	0.1	0.1
	0.2	0.2	0.2	0.2	0.2	0.2	0.1	0.1	0.1	0.1	0.1	0.1
	0.1	0.1	0.1	0.2	0.2	0.2	0	0	0	0.1	0.1	0.1
	0.1	0.1	0.1	0.1	0.1	0.1	0	0	0	0.1	0.1	0.1
	0.1	0.1	0.1	0.2	0.2	0.2	0	0	0	0	0	0
	0.1	0.1	0.1	0.1	0.1	0.1	0	0	0	0	0	0
	0.1	0.1	0.1	0.1	0.1	0.1	0	0	0	0	0	0
	0.1	0.1	0.1	0.2	0.2	0.2	0	0	0	0.1	0.1	0.1
	0.1	0.1	0.1	0.1	0.1	0.1	0	0	0	0	0	0
	0.2	0.2	0.2	0.1	0.1	0.1	0	0	0	0	0	0
	0.1	0.1	0.1	0.2	0.2	0.2	0	0	0	0.1	0.1	0.1
	0.1	0.1	0.1	0.1	0.1	0.1	0	0	0	0	0	0
	0.1	0.1	0.1	0.1	0.1	0.1	0	0	0	0	0	0
	0.1	0.1	0.1	0.1	0.1	0.1	0	0	0	0.1	0.1	0.1
	0.1	0.1	0.1	0.2	0.2	0.2	0.1	0.1	0.1	0.1	0.1	0.1
	0.1	0.1	0.1	0.2	0.2	0.2	0	0	0	0.1	0.1	0.1
	0.1	0.1	0.1	0.1	0.1	0.1	0	0	0	0.1	0.1	0.1
	0.2	0.2	0.2	0.3	0.3	0.1	0	0	0	0	0	0
	0.1	0.1	0.1	0.1	0.1	0.1	0	0	0	0	0	0
	0.1	0.1	0.1	0.1	0.1	0.1	0	0	0	0	0	0
	0.2	0.2	0.2	0.1	0.1	0.1	0	0	0	0	0	0
	0.1	0.1	0.1	0.2	0.2	0.2	0	0	0	0	0	0
	0.2	0.2	0.2	0.1	0.1	0.1	0	0	0	0	0	0
	0.1	0.1	0.1	0.1	0.1	0.1	0	0	0	0	0	0
	0.1	0.1	0.1	0.1	0.1	0.1	0	0	0	0	0	0
	0.2	0.2	0.2	0.1	0.1	0.1	0	0	0	0.1	0.1	0.1
	0.1	0.1	0.1	0.1	0.1	0.1	0	0	0	0.1	0.1	0.1
	0.1	0.1	0.1	0.1	0.1	0.1	0	0	0	0.1	0.1	0.1
	0.1	0.1	0.1	0.1	0.1	0.1	0	0	0	0	0	0
	0.2	0.2	0.2	0.1	0.1	0.1	0	0	0	0	0	0
	0.2	0.2	0.2	0.1	0.1	0.1	0	0	0	0.1	0.1	0.1
	0.2	0.2	0.2	0.1	0.1	0.1	0	0	0	0	0	0
	0.1	0.1	0.1	0.2	0.2	0.2	0	0	0	0	0	0
	0.1	0.1	0.1	0.1	0.1	0.1	0	0	0	0.1	0.1	0.1
	0.1	0.1	0.1	0.1	0.1	0.1	0	0	0	0	0	0
	0.1	0.1	0.1	0.1	0.1	0.1	0	0	0	0	0	0
	0.1	0.1	0.1	0.1	0.1	0.1	0	0	0	0	0	0
	0.1	0.1	0.1	0.1	0.1	0.1	0	0	0	0.1	0.1	0.1
	0.1	0.1	0.1	0.1	0.1	0.1	0	0	0	0	0	0
	0.2	0.2	0.2	0.1	0.1	0.1	0	0	0	0	0	0
	0.2	0.2	0.2	0.1	0.1	0.1	0	0	0	0.1	0.1	0.1
	0.2	0.2	0.2	0.1	0.1	0.1	0	0	0	0.1	0.1	0.1
	0.1	0.1	0.1	0.1	0.1	0.1	0.1	0.1	0.1	0.1	0.1	0.1
	0.2	0.2	0.2	0.1	0.1	0.1	0	0	0	0	0	0
	0.1	0.1	0.1	0.1	0.1	0.1	0	0	0	0.2	0.2	0.1
	0.2	0.2	0.2	0.1	0.1	0.1	0	0	0	0	0	0
	0.1	0.1	0.1	0.8	0.7	0.2	0	0	0	0.1	0.1	0.1
	0.1	0.1	0.1	0.1	0.1	0.1	0	0	0	0.1	0.1	0.1
	0.1	0.1	0.1	0.1	0.1	0.1	0	0	0	0	0	0
	0.1	0.1	0.1	0.1	0.1	0.1	0	0	0	0.1	0.1	0.1
	0.1	0.1	0.1	0.1	0.1	0.1	0	0	0	0	0	0
	0.1	0.1	0.1	0.2	0.2	0.2	0	0	0	0	0	0
	0.1	0.1	0.1	0.1	0.1	0.1	0	0	0	0.1	0.1	0.1
	0.1	0.1	0.1	0.1	0.1	0.1	0	0	0	0.1	0.1	0.1
	0.1	0.1	0.1	0.1	0.1	0.1	0	0	0	0.1	0.1	0.1
	0.1	0.1	0.1	0.1	0.1	0.1	0	0	0	0.1	0.1	0.1
	0.1	0.1	0.1	0.1	0.1	0.1	0	0	0	0.1	0.1	0.1
	0.1	0.1	0.1	0.1	0.1	0.1	0.1	0.1	0.1	0.1	0.1	0.1
	0.1	0.1	0.1	0.1	0.1	0.1	0	0	0	0	0	0
	0.1	0.1	0.1	0.1	0.1	0.1	0	0	0	0	0	0
	0.1	0.1	0.1	0.1	0.1	0.1	0	0	0	0.1	0.1	0.1
	0.1	0.1	0.1	0.2	0.2	0.2	0	0	0	0	0	0
	0.1	0.1	0.1	1	0.6	0.1	0	0	0	0.1	0.1	0.1
	0.1	0.1	0.1	0.1	0.1	0.1	0	0	0	0	0	0
	0.1	0.1	0.1	0.2	0.2	0.2	0	0	0	0	0	0
	0.2	0.2	0.2	0.1	0.1	0.1	0	0	0	0	0	0
	0.1	0.1	0.1	0.1	0.1	0.1	0	0	0	0	0	0
	0.2	0.2	0.2	0.2	0.2	0.2	0	0	0	0	0	0
	0.1	0.1	0.1	0.1	0.1	0.1	0	0	0	0	0	0
	0.1	0.1	0.1	0.1	0.1	0.1	0	0	0	0	0	0
	0.1	0.1	0.1	0.1	0.1	0.1	0	0	0	0	0	0
	0.1	0.1	0.1	0.1	0.1	0.1	0.1	0.1	0.1	0.1	0.1	0.1
	0.1	0.1	0.1	0.1	0.1	0.1	0.1	0.1	0.1	0	0	0
	0.2	0.2	0.2	0.1	0.1	0.1	0	0	0	0.1	0.1	0.1
	0.1	0.1	0.1	0.1	0.1	0.1	0	0	0	0	0	0
	0.1	0.1	0.1	0.2	0.2	0.2	0	0	0	0.1	0.1	0.1
	0.1	0.1	0.1	1	0.7	0.1	0	0	0	0	0	0
	0.2	0.2	0.2	0	0	0	0	0	0	0.1	0.1	0.1
	0.1	0.1	0.1	0.8	0.7	0.2	0	0	0	0.1	0.1	0.1
	0.1	0.1	0.1	0.1	0.1	0.1	0	0	0	0	0	0
	0.1	0.1	0.1	0.1	0.1	0.1	0	0	0	0.1	0.1	0.1
	0.1	0.1	0.1	0.1	0.1	0.1	0	0	0	0	0	0
	0.1	0.1	0.1	0.1	0.1	0.1	0	0	0	0.1	0.1	0.1
	0.1	0.1	0.1	0.1	0.1	0.1	0	0	0	0	0	0
	0.1	0.1	0.1	0.1	0.1	0.1	0	0	0	0	0	0
	0.1	0.1	0.1	0.1	0.1	0.1	0	0	0	0.1	0.1	0.1
	0.2	0.2	0.2	0.1	0.1	0.1	0	0	0	0.1	0.1	0.1
	0.2	0.2	0.2	0.1	0.1	0.1	0	0	0	0.1	0.1	0.1
	0.2	0.2	0.2	0.1	0.1	0.1	0	0	0	0	0	0
	0.1	0.1	0.1	0.1	0.1	0.1	0	0	0	0	0	0
	0.1	0.1	0.1	0.1	0.1	0.1	0	0	0	0	0	0
	0.1	0.1	0.1	0.1	0.1	0.1	0	0	0	0.1	0.1	0.1
	0.1	0.1	0.1	1	0.7	0.1	0	0	0	0	0	0
	0.1	0.1	0.1	0.2	0.2	0.2	0	0	0	0	0	0
	0.1	0.1	0.1	0.1	0.1	0.1	0	0	0	0.1	0.1	0.1
	0.1	0.1	0.1	0.1	0.1	0.1	0.1	0.1	0.1	0.1	0.1	0.1
	0.1	0.1	0.1	0.1	0.1	0.1	0	0	0	0	0	0
	0.1	0.1	0.1	0.1	0.1	0.1	0	0	0	0	0	0
	0.1	0.1	0.1	0.1	0.1	0.1	0	0	0	0	0	0
	0.1	0.1	0.1	0.1	0.1	0.1	0	0	0	0.1	0.1	0.1
	0.1	0.1	0.1	0.1	0.1	0.1	0	0	0	0	0	0
	0.2	0.2	0.2	0.1	0.1	0.1	0	0	0	0.1	0.1	0.1
	0.1	0.1	0.1	0.1	0.1	0.1	0	0	0	0.1	0.1	0.1
	0.1	0.1	0.1	0.1	0.1	0.1	0	0	0	0.1	0.1	0.1
	0.2	0.2	0.2	0.1	0.1	0.1	0	0	0	0	0	0
	0.1	0.1	0.1	0.1	0.1	0.1	0	0	0	0	0	0
	0.2	0.2	0.2	0.2	0.2	0.2	0	0	0	0	0	0
	0.1	0.1	0.1	0.1	0.1	0.1	0	0	0	0	0	0
	0.1	0.1	0.1	0.1	0.1	0.1	0	0	0	0.1	0.1	0.1
	0.1	0.1	0.1	0.2	0.2	0.2	0	0	0	0	0	0
	0.2	0.2	0.2	0.1	0.1	0.1	0	0	0	0.1	0.1	0.1
	0.1	0.1	0.1	0.1	0.1	0.1	0	0	0	0.1	0.1	0.1
	0.1	0.1	0.1	0.2	0.2	0.2	0	0	0	0.1	0.1	0.1
	0.1	0.1	0.1	0.1	0.1	0.1	0	0	0	0.1	0.1	0.1
	0.1	0.1	0.1	0.2	0.2	0.2	0	0	0	0.1	0.1	0.1
	0.1	0.1	0.1	0.1	0.1	0.1	0	0	0	0	0	0
	0.1	0.1	0.1	0.1	0.1	0.1	0	0	0	0.1	0.1	0.1
	0.2	0.2	0.2	0.1	0.1	0.1	0	0	0	0.1	0.1	0.1
	0.1	0.1	0.1	0.1	0.1	0.1	0	0	0	0.1	0.1	0.1
	0.1	0.1	0.1	0.1	0.1	0.1	0	0	0	0	0	0
	0.1	0.1	0.1	0.1	0.1	0.1	0	0	0	0.1	0.1	0.1
	0.1	0.1	0.1	0.1	0.1	0.1	0	0	0	0	0	0
	0.2	0.2	0.2	0.1	0.1	0.1	0	0	0	0.1	0.1	0.1
	0.2	0.2	0.2	0.2	0.2	0.2	0	0	0	0	0	0
	0.2	0.2	0.2	0.1	0.1	0.1	0	0	0	0.1	0.1	0.1
	0.1	0.1	0.1	0.1	0.1	0.1	0	0	0	0	0	0
	0.1	0.1	0.1	0.2	0.2	0.2	0	0	0	0.1	0.1	0.1
	0.1	0.1	0.1	0.2	0.2	0.1	0	0	0	0	0	0
[truncated: 1,536 more rows]

## Sheet: broadleaf
ug/m^3	4ms	1/8
[truncated: 2,706 more rows]
